# Supplementary material for: A Reverse Engineering Approach to the Suppression of Citation Biases Reveals Universal Properties of Citation Distributions
Source: PubMed Central journal article supplement (PMC3315498; doi:10.1371/journal.pone.0033833), 2012-03-29
Supplement: pone.0033833.s001.pdf [file pone.0033833.s001.pdf]

| Pub. type                | Number of pub. | Percentage of pub. |
|--------------------------|----------------|--------------------|
| Art Exhibit Review       | 1              | 0.00%              |
| Article                  | 222,223        | 66.25%             |
| Biographical-Item        | 3              | 0.00%              |
| Book Review              | 3,206          | 0.96%              |
| Chronology               | 1              | 0.00%              |
| Correction               | 10             | 0.00%              |
| Correction, Addition     | 2,744          | 0.82%              |
| Discussion               | 687            | 0.20%              |
| Editorial Material       | 8,720          | 2.60%              |
| Item About an Individual | 117            | 0.03%              |
| Letter                   | 19,491         | 5.81%              |
| Meeting Abstract         | 48,489         | 14.46%             |
| Note                     | 25,596         | 7.63%              |
| Review                   | 4,133          | 1.23%              |
| <b>Total</b>             | <b>335,421</b> | <b>100.00%</b>     |

Table S1: Publication year 1980.

| Language       | Number of pub. | Percentage of pub. |
|----------------|----------------|--------------------|
| Afrikaans      | 3              | 0.00%              |
| Czech          | 382            | 0.11%              |
| Danish         | 1              | 0.00%              |
| Dutch          | 153            | 0.05%              |
| English        | 314,826        | 93.86%             |
| Finnish        | 41             | 0.01%              |
| French         | 4,872          | 1.45%              |
| German         | 9,520          | 2.84%              |
| Greek          | 1              | 0.00%              |
| Hungarian      | 215            | 0.06%              |
| Italian        | 462            | 0.14%              |
| Japanese       | 1,112          | 0.33%              |
| Multi-Language | 1              | 0.00%              |
| Norwegian      | 11             | 0.00%              |
| Polish         | 378            | 0.11%              |
| Portuguese     | 102            | 0.03%              |
| Rumanian       | 231            | 0.07%              |
| Russian        | 1,467          | 0.44%              |
| Serbo-Croatian | 35             | 0.01%              |
| Slovak         | 7              | 0.00%              |
| Spanish        | 1,601          | 0.48%              |
| <b>Total</b>   | <b>335,421</b> | <b>100.00%</b>     |

Table S2: Publication year 1980.

| Pub. type                | Number of pub. | Percentage of pub. |
|--------------------------|----------------|--------------------|
| Art Exhibit Review       | 1              | 0.00%              |
| Article                  | 288,673        | 65.27%             |
| Biographical-Item        | 10             | 0.00%              |
| Book Review              | 3,773          | 0.85%              |
| Chronology               | 7              | 0.00%              |
| Correction               | 21             | 0.00%              |
| Correction, Addition     | 3,690          | 0.83%              |
| Database Review          | 2              | 0.00%              |
| Discussion               | 1,159          | 0.26%              |
| Editorial Material       | 14,156         | 3.20%              |
| Hardware Review          | 6              | 0.00%              |
| Item About an Individual | 1,090          | 0.25%              |
| Letter                   | 25,335         | 5.73%              |
| Meeting Abstract         | 68,447         | 15.48%             |
| Not Specified            | 1              | 0.00%              |
| Note                     | 27,883         | 6.30%              |
| Review                   | 7,980          | 1.80%              |
| Software Review          | 68             | 0.02%              |
| <b>Total</b>             | <b>442,302</b> | <b>100.00%</b>     |

Table S3: Publication year 1985.

| Language       | Number of pub. | Percentage of pub. |
|----------------|----------------|--------------------|
| Afrikaans      | 18             | 0.00%              |
| Chinese        | 400            | 0.09%              |
| Czech          | 394            | 0.09%              |
| Danish         | 1              | 0.00%              |
| Dutch          | 216            | 0.05%              |
| English        | 416,332        | 94.13%             |
| Finnish        | 55             | 0.01%              |
| French         | 6,733          | 1.52%              |
| German         | 9,832          | 2.22%              |
| Hungarian      | 175            | 0.04%              |
| Italian        | 55             | 0.01%              |
| Japanese       | 3,054          | 0.69%              |
| Polish         | 248            | 0.06%              |
| Portuguese     | 393            | 0.09%              |
| Rumanian       | 193            | 0.04%              |
| Russian        | 1,810          | 0.41%              |
| Serbo-Croatian | 53             | 0.01%              |
| Slovene        | 11             | 0.00%              |
| Spanish        | 2,327          | 0.53%              |
| Swedish        | 1              | 0.00%              |
| <b>Total</b>   | <b>442,302</b> | <b>100.00%</b>     |

Table S4: Publication year 1985.

| Pub. type                | Number of pub. | Percentage of pub. |
|--------------------------|----------------|--------------------|
| Article                  | 338,398        | 65.44%             |
| Bibliography             | 156            | 0.03%              |
| Biographical-Item        | 18             | 0.00%              |
| Book Review              | 3,741          | 0.72%              |
| Chronology               | 2              | 0.00%              |
| Correction               | 12             | 0.00%              |
| Correction, Addition     | 4,088          | 0.79%              |
| Database Review          | 3              | 0.00%              |
| Discussion               | 1,266          | 0.24%              |
| Editorial Material       | 20,605         | 3.98%              |
| Hardware Review          | 21             | 0.00%              |
| Item About an Individual | 1,222          | 0.24%              |
| Letter                   | 29,722         | 5.75%              |
| Meeting Abstract         | 40,848         | 7.90%              |
| Note                     | 32,688         | 6.32%              |
| Proceedings Paper        | 33,523         | 6.48%              |
| Reprint                  | 2              | 0.00%              |
| Review                   | 10,500         | 2.03%              |
| Software Review          | 291            | 0.06%              |
| <b>Total</b>             | <b>517,106</b> | <b>100.00%</b>     |

Table S5: Publication year 1990.

| Language       | Number of pub. | Percentage of pub. |
|----------------|----------------|--------------------|
| Afrikaans      | 9              | 0.00%              |
| Arabic         | 2              | 0.00%              |
| Chinese        | 394            | 0.08%              |
| Czech          | 421            | 0.08%              |
| Dutch          | 166            | 0.03%              |
| English        | 496,887        | 96.09%             |
| Finnish        | 92             | 0.02%              |
| French         | 5,136          | 0.99%              |
| German         | 7,348          | 1.42%              |
| Hungarian      | 214            | 0.04%              |
| Italian        | 18             | 0.00%              |
| Japanese       | 1,804          | 0.35%              |
| Multi-Language | 2              | 0.00%              |
| Polish         | 210            | 0.04%              |
| Portuguese     | 288            | 0.06%              |
| Rumanian       | 154            | 0.03%              |
| Russian        | 1,801          | 0.35%              |
| Serbo-Croatian | 52             | 0.01%              |
| Slovak         | 20             | 0.00%              |
| Slovene        | 18             | 0.00%              |
| Spanish        | 2,070          | 0.40%              |
| <b>Total</b>   | <b>517,106</b> | <b>100.00%</b>     |

Table S6: Publication year 1990.

| Pub. type                | Number of pub. | Percentage of pub. |
|--------------------------|----------------|--------------------|
| Article                  | 423,885        | 58.43%             |
| Bibliography             | 188            | 0.03%              |
| Biographical-Item        | 31             | 0.00%              |
| Book Review              | 4,410          | 0.61%              |
| Chronology               | 2              | 0.00%              |
| Correction               | 83             | 0.01%              |
| Correction, Addition     | 5,388          | 0.74%              |
| Database Review          | 12             | 0.00%              |
| Discussion               | 1,484          | 0.20%              |
| Editorial Material       | 31,190         | 4.30%              |
| Hardware Review          | 54             | 0.01%              |
| Item About an Individual | 2,891          | 0.40%              |
| Letter                   | 35,967         | 4.96%              |
| Meeting Abstract         | 97,133         | 13.39%             |
| News Item                | 513            | 0.07%              |
| Note                     | 50,081         | 6.90%              |
| Proceedings Paper        | 54,690         | 7.54%              |
| Reprint                  | 525            | 0.07%              |
| Review                   | 16,514         | 2.28%              |
| Software Review          | 394            | 0.05%              |
| <b>Total</b>             | <b>725,435</b> | <b>100.00%</b>     |

Table S7: Publication year 1995.

| Language     | Number of pub. | Percentage of pub. |
|--------------|----------------|--------------------|
| Afrikaans    | 7              | 0.00%              |
| Chinese      | 1,140          | 0.16%              |
| Croatian     | 163            | 0.02%              |
| Czech        | 313            | 0.04%              |
| Danish       | 19             | 0.00%              |
| Dutch        | 268            | 0.04%              |
| English      | 702,690        | 96.86%             |
| Estonian     | 8              | 0.00%              |
| Finnish      | 79             | 0.01%              |
| French       | 6,007          | 0.83%              |
| German       | 8,401          | 1.16%              |
| Hungarian    | 191            | 0.03%              |
| Italian      | 18             | 0.00%              |
| Japanese     | 1,886          | 0.26%              |
| Korean       | 45             | 0.01%              |
| Latin        | 1              | 0.00%              |
| Norwegian    | 1              | 0.00%              |
| Polish       | 238            | 0.03%              |
| Portuguese   | 351            | 0.05%              |
| Rumanian     | 233            | 0.03%              |
| Russian      | 1,185          | 0.16%              |
| Slovak       | 27             | 0.00%              |
| Slovene      | 51             | 0.01%              |
| Spanish      | 2,109          | 0.29%              |
| Swedish      | 2              | 0.00%              |
| Ukrainian    | 1              | 0.00%              |
| Welsh        | 1              | 0.00%              |
| <b>Total</b> | <b>725,435</b> | <b>100.00%</b>     |

Table S8: Publication year 1995.



| Pub. type               | Number of pub. | Percentage of pub. |
|-------------------------|----------------|--------------------|
| Article                 | 545,308        | 63.28%             |
| Bibliography            | 205            | 0.02%              |
| Biographical-Item       | 3,460          | 0.40%              |
| Book Review             | 3,986          | 0.46%              |
| Correction              | 5,809          | 0.67%              |
| Database Review         | 8              | 0.00%              |
| Editorial Material      | 37,503         | 4.35%              |
| Fiction, Creative Prose | 2              | 0.00%              |
| Hardware Review         | 24             | 0.00%              |
| Letter                  | 34,756         | 4.03%              |
| Meeting Abstract        | 122,339        | 14.20%             |
| News Item               | 19,111         | 2.22%              |
| Note                    | 1              | 0.00%              |
| Poetry                  | 2              | 0.00%              |
| Proceedings Paper       | 65,322         | 7.58%              |
| Reprint                 | 573            | 0.07%              |
| Review                  | 22,946         | 2.66%              |
| Software Review         | 340            | 0.04%              |
| <b>Total</b>            | <b>861,695</b> | <b>100.00%</b>     |

Table S9: Publication year 1999.

| Language     | Number of pub. | Percentage of pub. |
|--------------|----------------|--------------------|
| Arabic       | 4              | 0.00%              |
| Chinese      | 3,155          | 0.37%              |
| Croatian     | 164            | 0.02%              |
| Czech        | 398            | 0.05%              |
| Dutch        | 195            | 0.02%              |
| English      | 834,760        | 96.87%             |
| Estonian     | 2              | 0.00%              |
| Finnish      | 61             | 0.01%              |
| French       | 6,443          | 0.75%              |
| Georgian     | 1              | 0.00%              |
| German       | 8,285          | 0.96%              |
| Hungarian    | 153            | 0.02%              |
| Italian      | 67             | 0.01%              |
| Japanese     | 2,041          | 0.24%              |
| Korean       | 109            | 0.01%              |
| Polish       | 419            | 0.05%              |
| Portuguese   | 901            | 0.10%              |
| Rumanian     | 183            | 0.02%              |
| Russian      | 932            | 0.11%              |
| Slovak       | 22             | 0.00%              |
| Slovene      | 47             | 0.01%              |
| Spanish      | 3,176          | 0.37%              |
| Swedish      | 1              | 0.00%              |
| Turkish      | 169            | 0.02%              |
| Welsh        | 7              | 0.00%              |
| <b>Total</b> | <b>861,695</b> | <b>100.00%</b>     |

Table S10: Publication year 1999.

| Pub. type                  | Number of pub.   | Percentage of pub. |
|----------------------------|------------------|--------------------|
| Abstract of Published Item | 1                | 0.00%              |
| Article                    | 655,980          | 60.59%             |
| Bibliography               | 102              | 0.01%              |
| Biographical-Item          | 3,781            | 0.35%              |
| Book Review                | 3,560            | 0.33%              |
| Correction                 | 7,764            | 0.72%              |
| Database Review            | 5                | 0.00%              |
| Editorial Material         | 48,964           | 4.52%              |
| Hardware Review            | 17               | 0.00%              |
| Letter                     | 33,591           | 3.10%              |
| Meeting Abstract           | 190,524          | 17.60%             |
| News Item                  | 18,994           | 1.75%              |
| Not Specified              | 1                | 0.00%              |
| Proceedings Paper          | 81,656           | 7.54%              |
| Reprint                    | 526              | 0.05%              |
| Review                     | 37,092           | 3.43%              |
| Software Review            | 153              | 0.01%              |
| <b>Total</b>               | <b>1,082,711</b> | <b>100.00%</b>     |

Table S11: Publication year 2004.

| Language     | Number of pub.   | Percentage of pub. |
|--------------|------------------|--------------------|
| Afrikaans    | 1                | 0.00%              |
| Chinese      | 5,875            | 0.54%              |
| Croatian     | 156              | 0.01%              |
| Czech        | 285              | 0.03%              |
| Danish       | 13               | 0.00%              |
| Dutch        | 172              | 0.02%              |
| English      | 1,054,224        | 97.37%             |
| Finnish      | 76               | 0.01%              |
| French       | 5,769            | 0.53%              |
| Georgian     | 2                | 0.00%              |
| German       | 7,761            | 0.72%              |
| Greek        | 1                | 0.00%              |
| Hungarian    | 134              | 0.01%              |
| Italian      | 70               | 0.01%              |
| Japanese     | 1,603            | 0.15%              |
| Korean       | 71               | 0.01%              |
| Persian      | 1                | 0.00%              |
| Polish       | 493              | 0.05%              |
| Portuguese   | 1,220            | 0.11%              |
| Rumanian     | 236              | 0.02%              |
| Russian      | 1,036            | 0.10%              |
| Slovak       | 12               | 0.00%              |
| Slovene      | 56               | 0.01%              |
| Spanish      | 3,363            | 0.31%              |
| Turkish      | 57               | 0.01%              |
| Ukrainian    | 8                | 0.00%              |
| Welsh        | 15               | 0.00%              |
| <b>Total</b> | <b>1,082,711</b> | <b>100.00%</b>     |

Table S12: Publication year 2004.
