# Supplementary material for: A Reverse Engineering Approach to the Suppression of Citation Biases Reveals Universal Properties of Citation Distributions
Source: PubMed Central journal article supplement (PMC3315498; doi:10.1371/journal.pone.0033833), 2012-03-29
Supplement: pone.0033833.s002.pdf [file pone.0033833.s002.pdf]

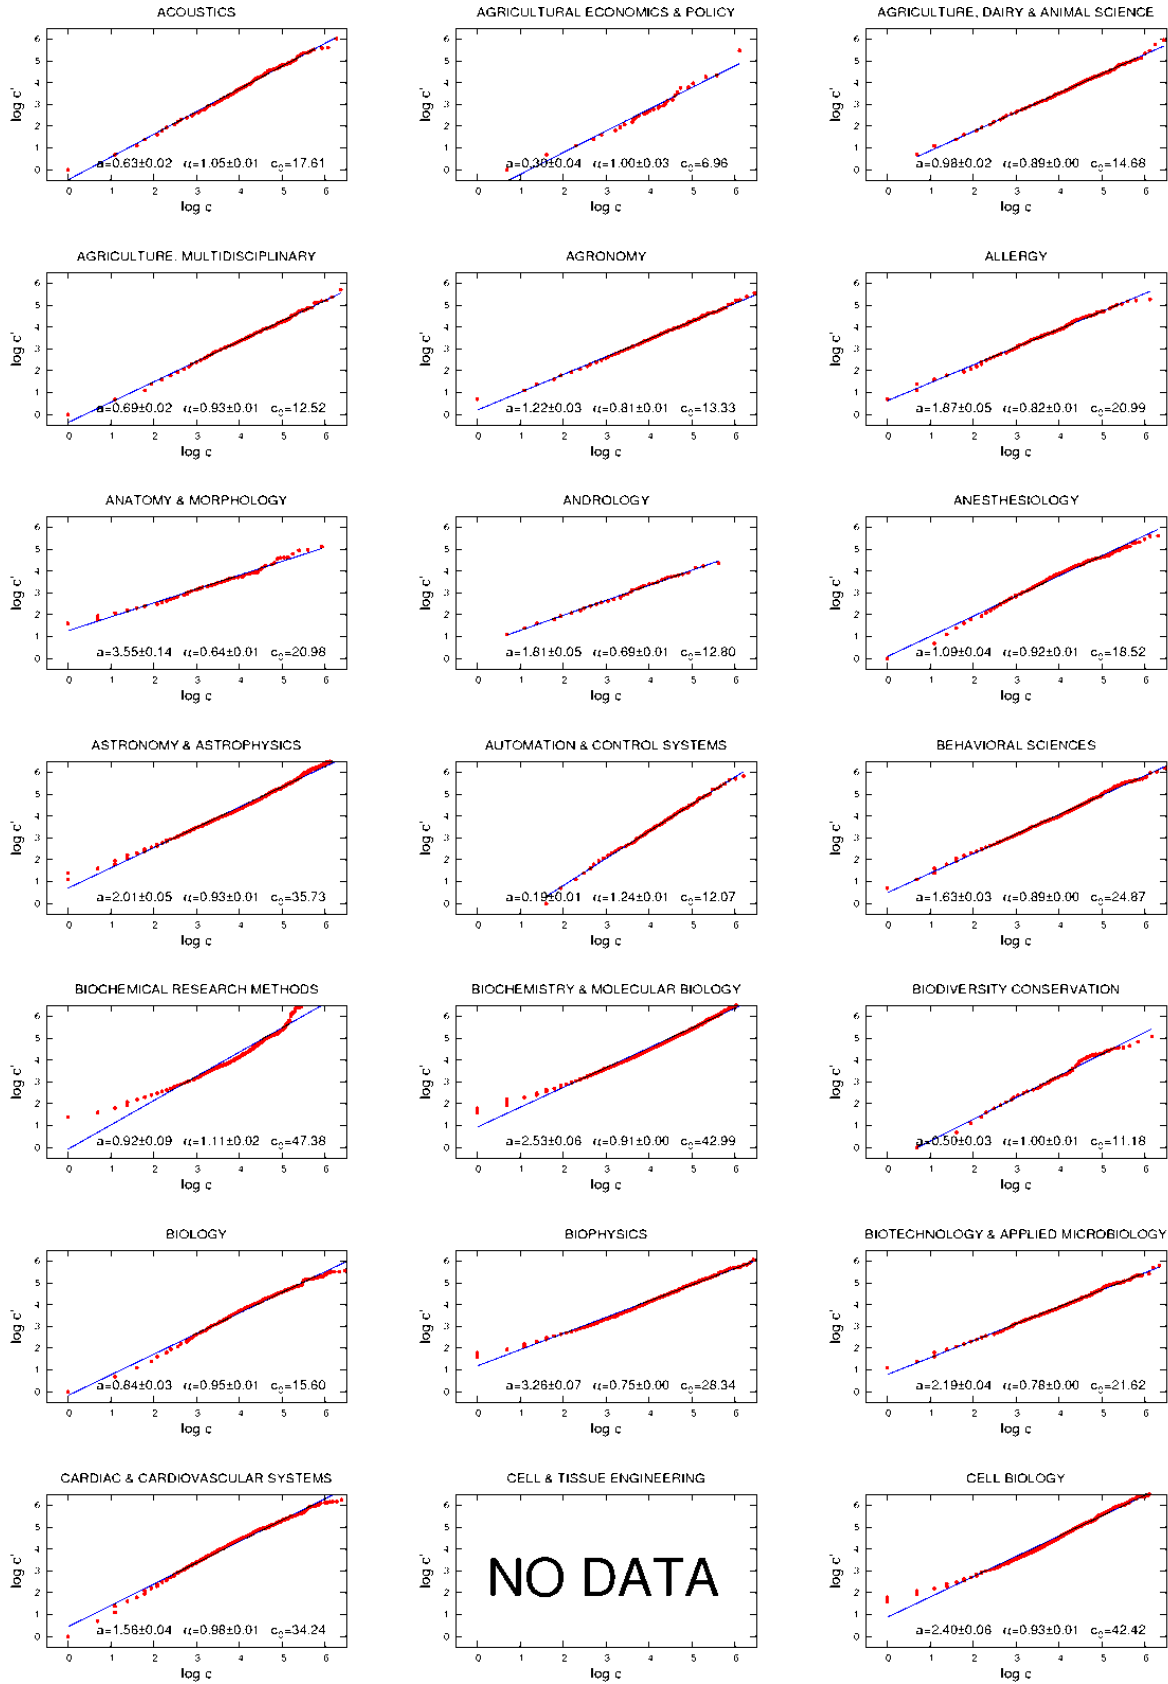

Figure S1: Publication year 1980.

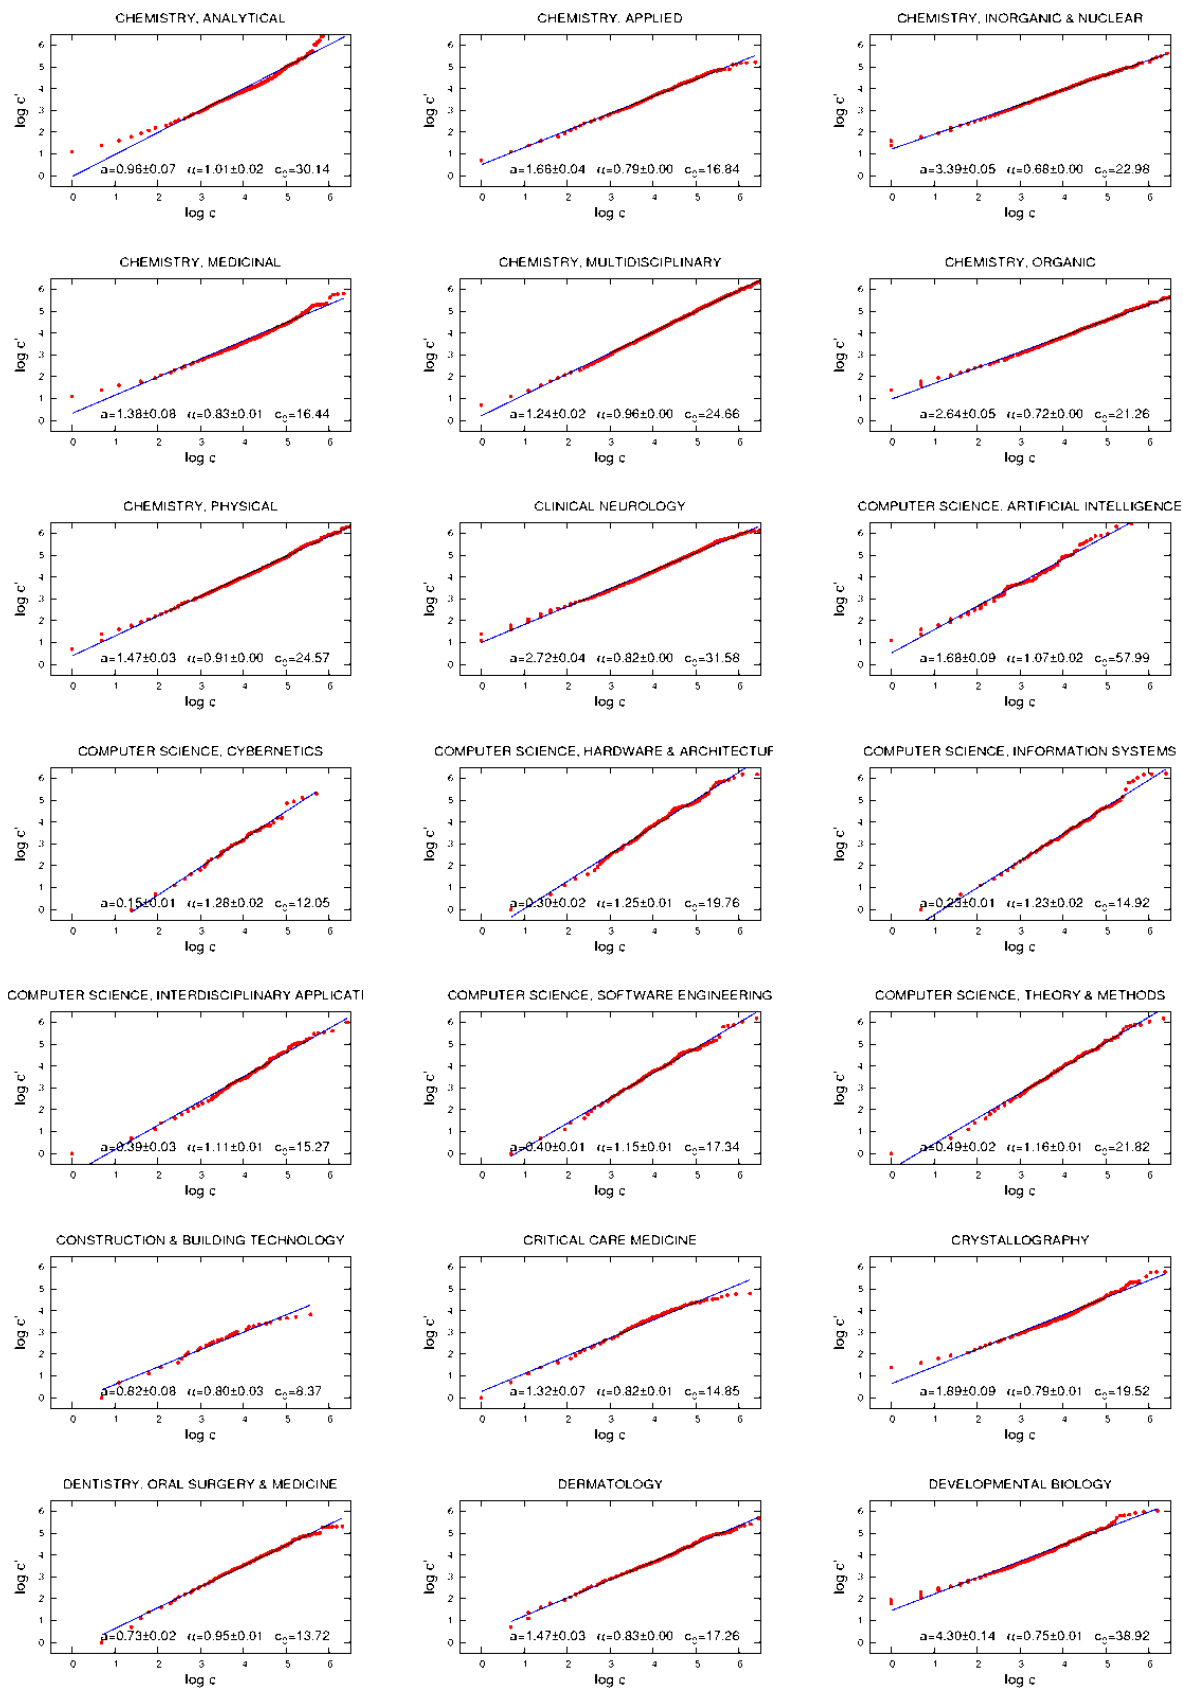

Figure S2: Publication year 1980.

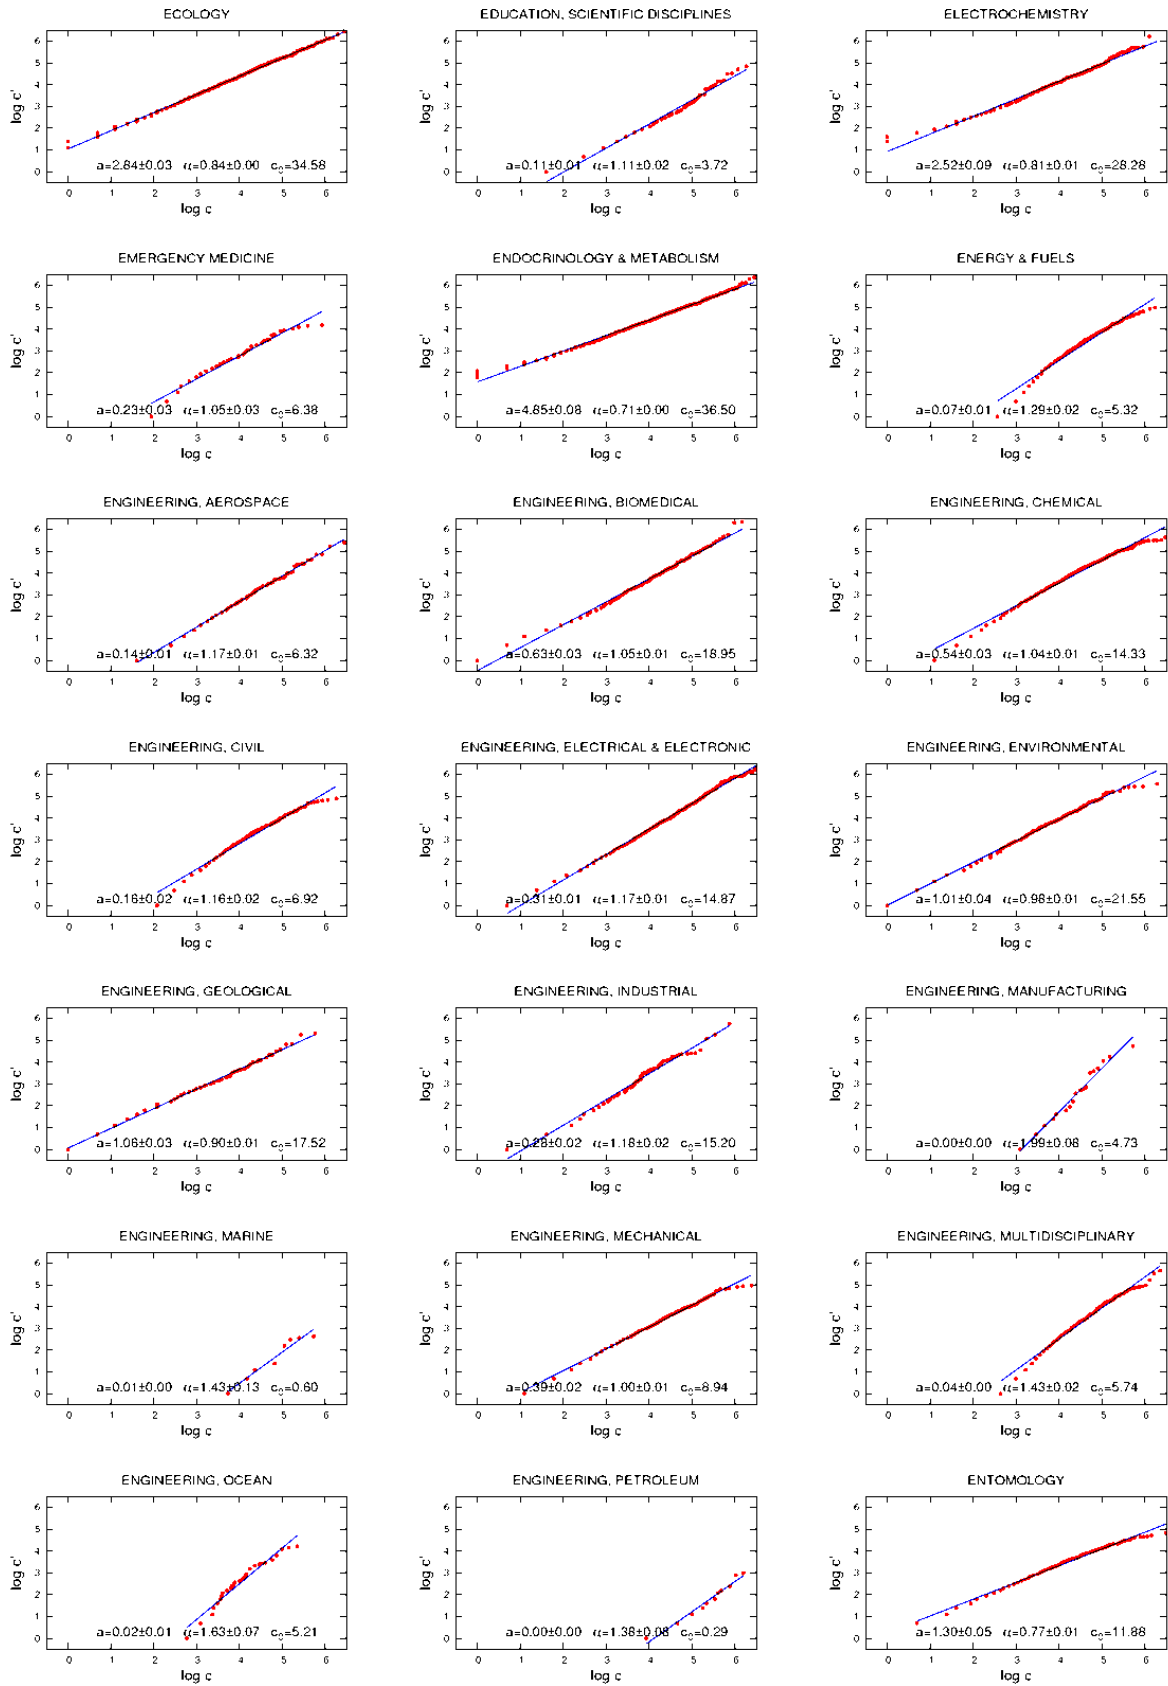

Figure S3: Publication year 1980.

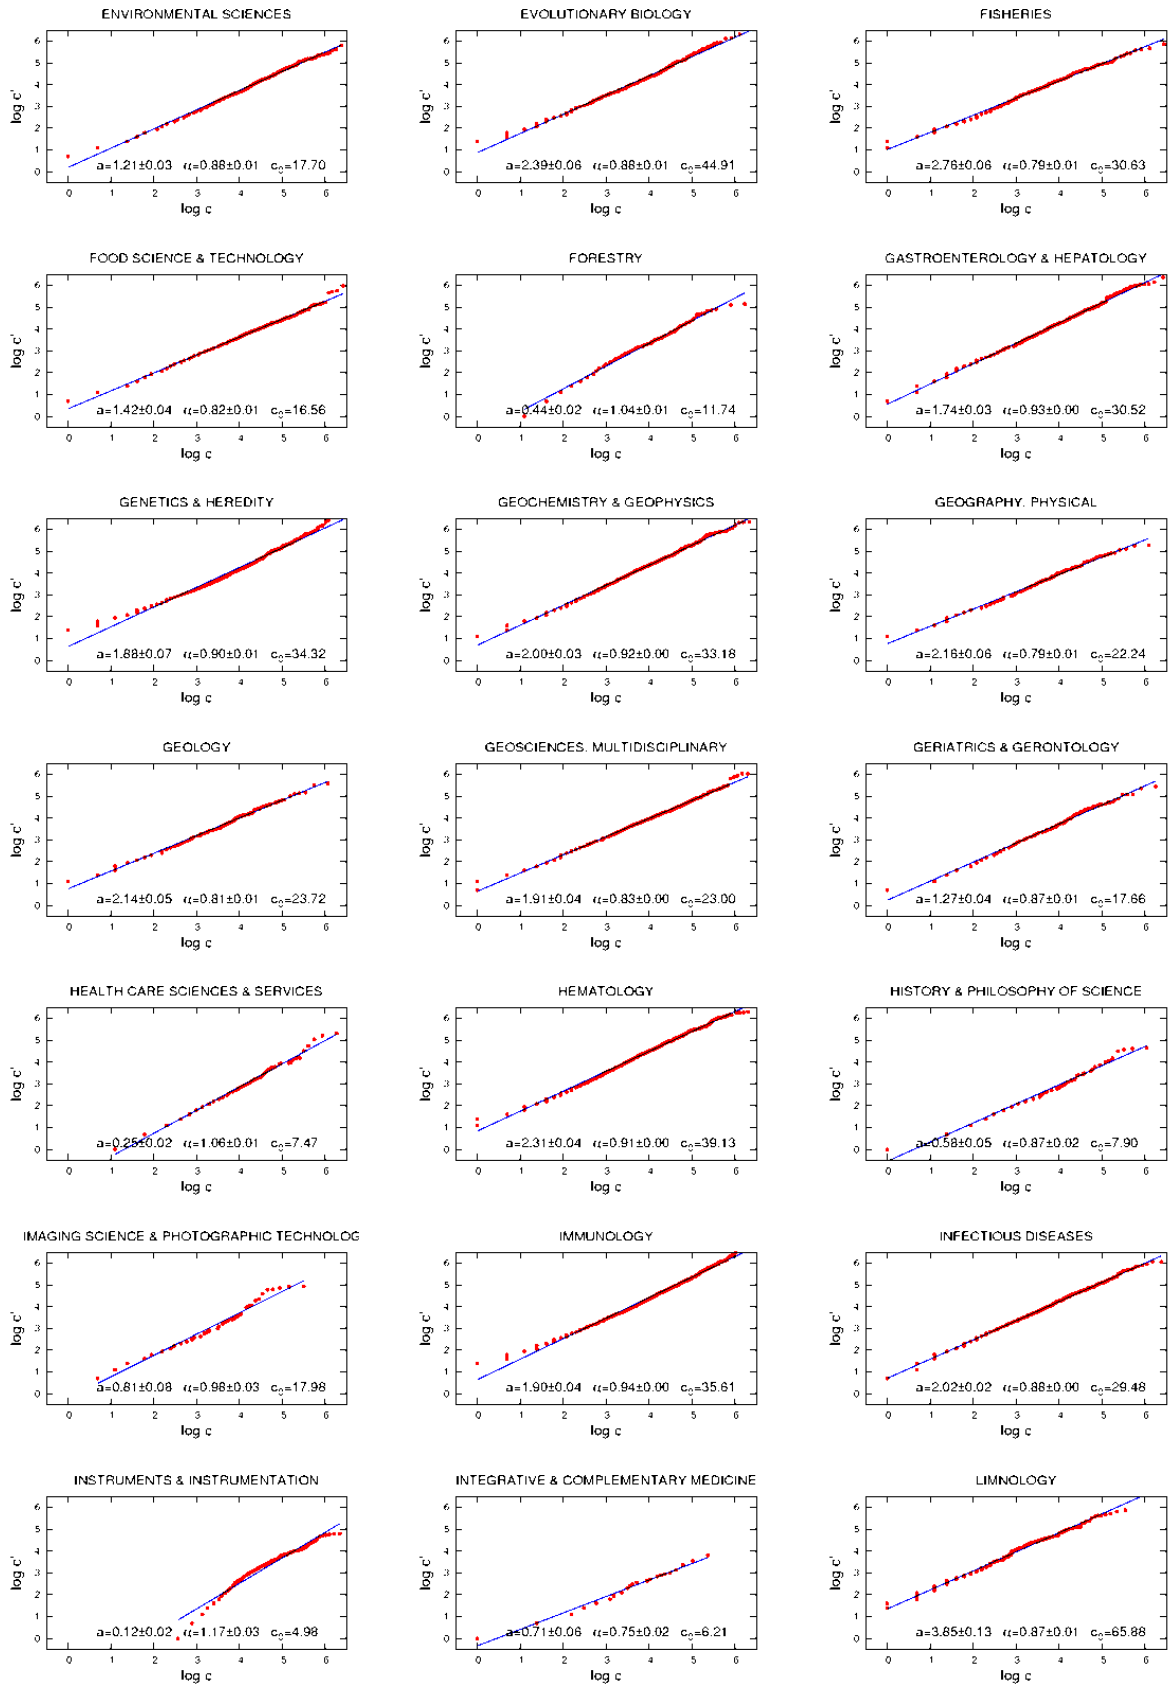

Figure S4: Publication year 1980.

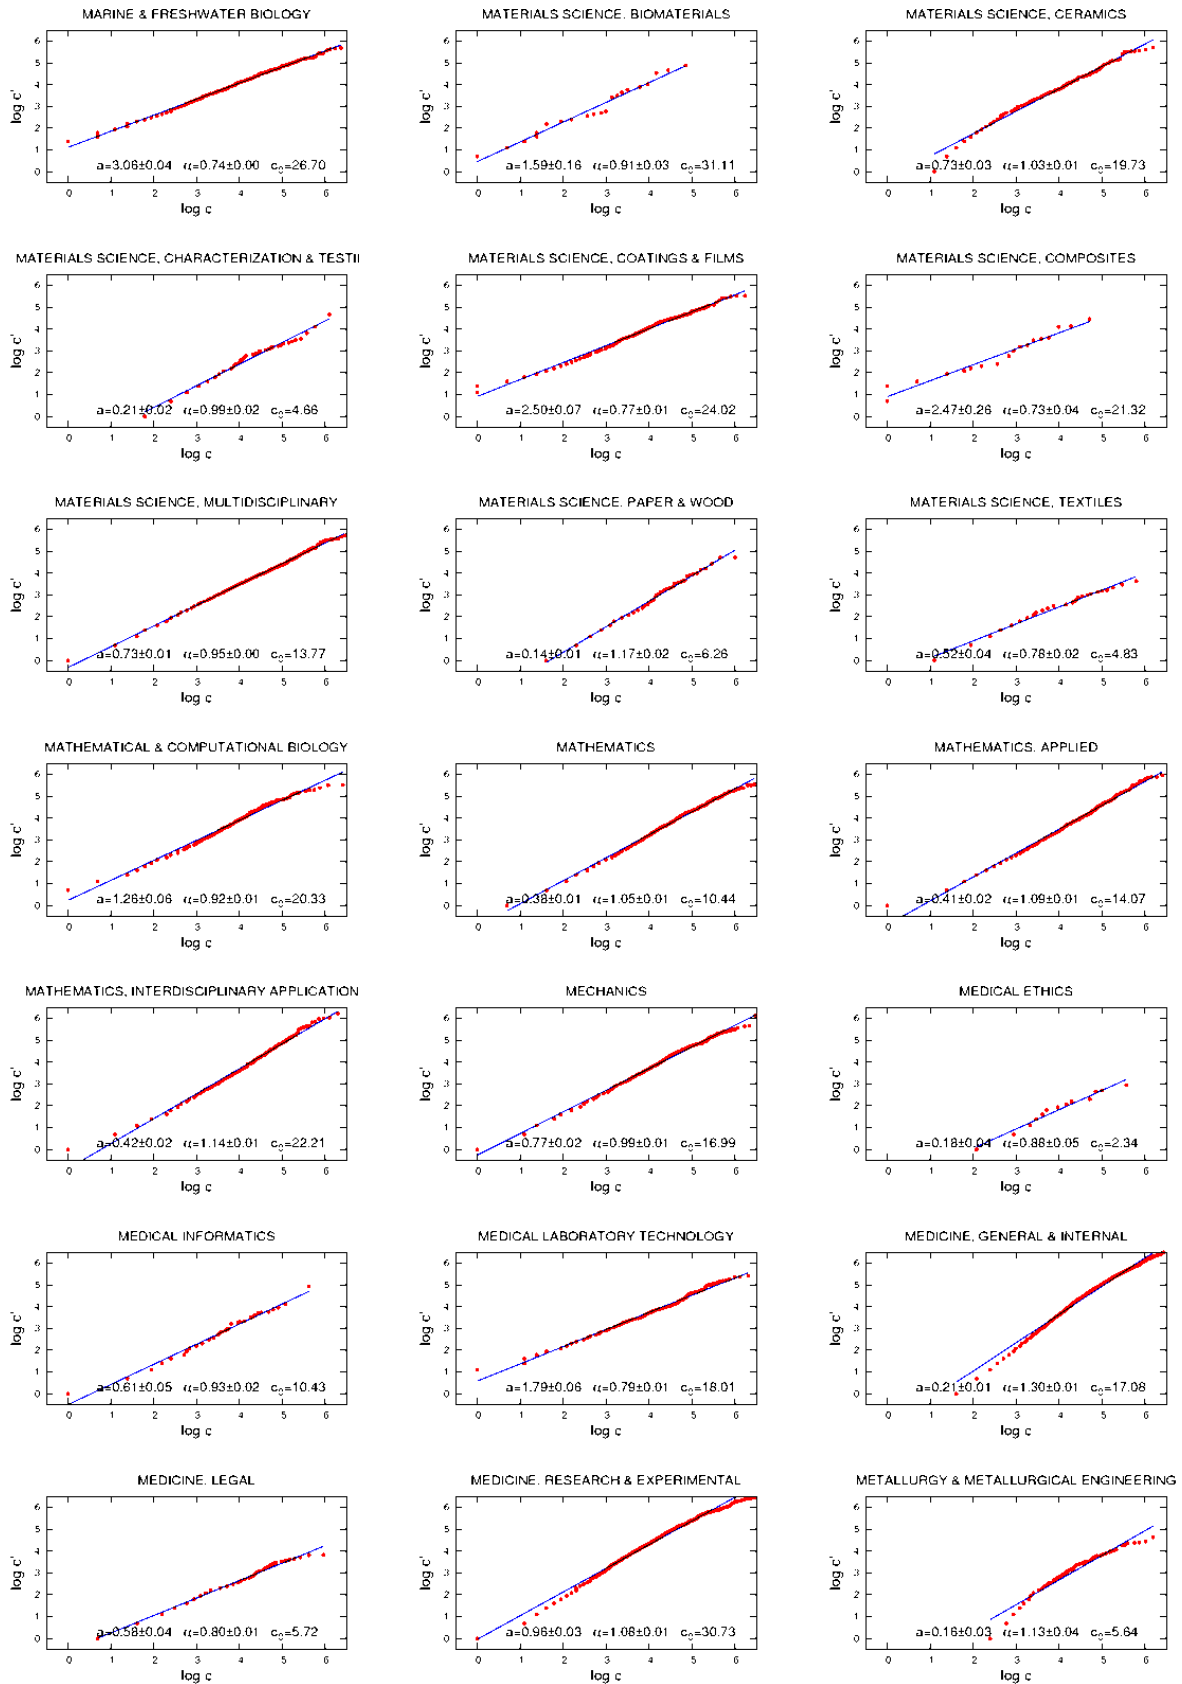

Figure S5: Publication year 1980.

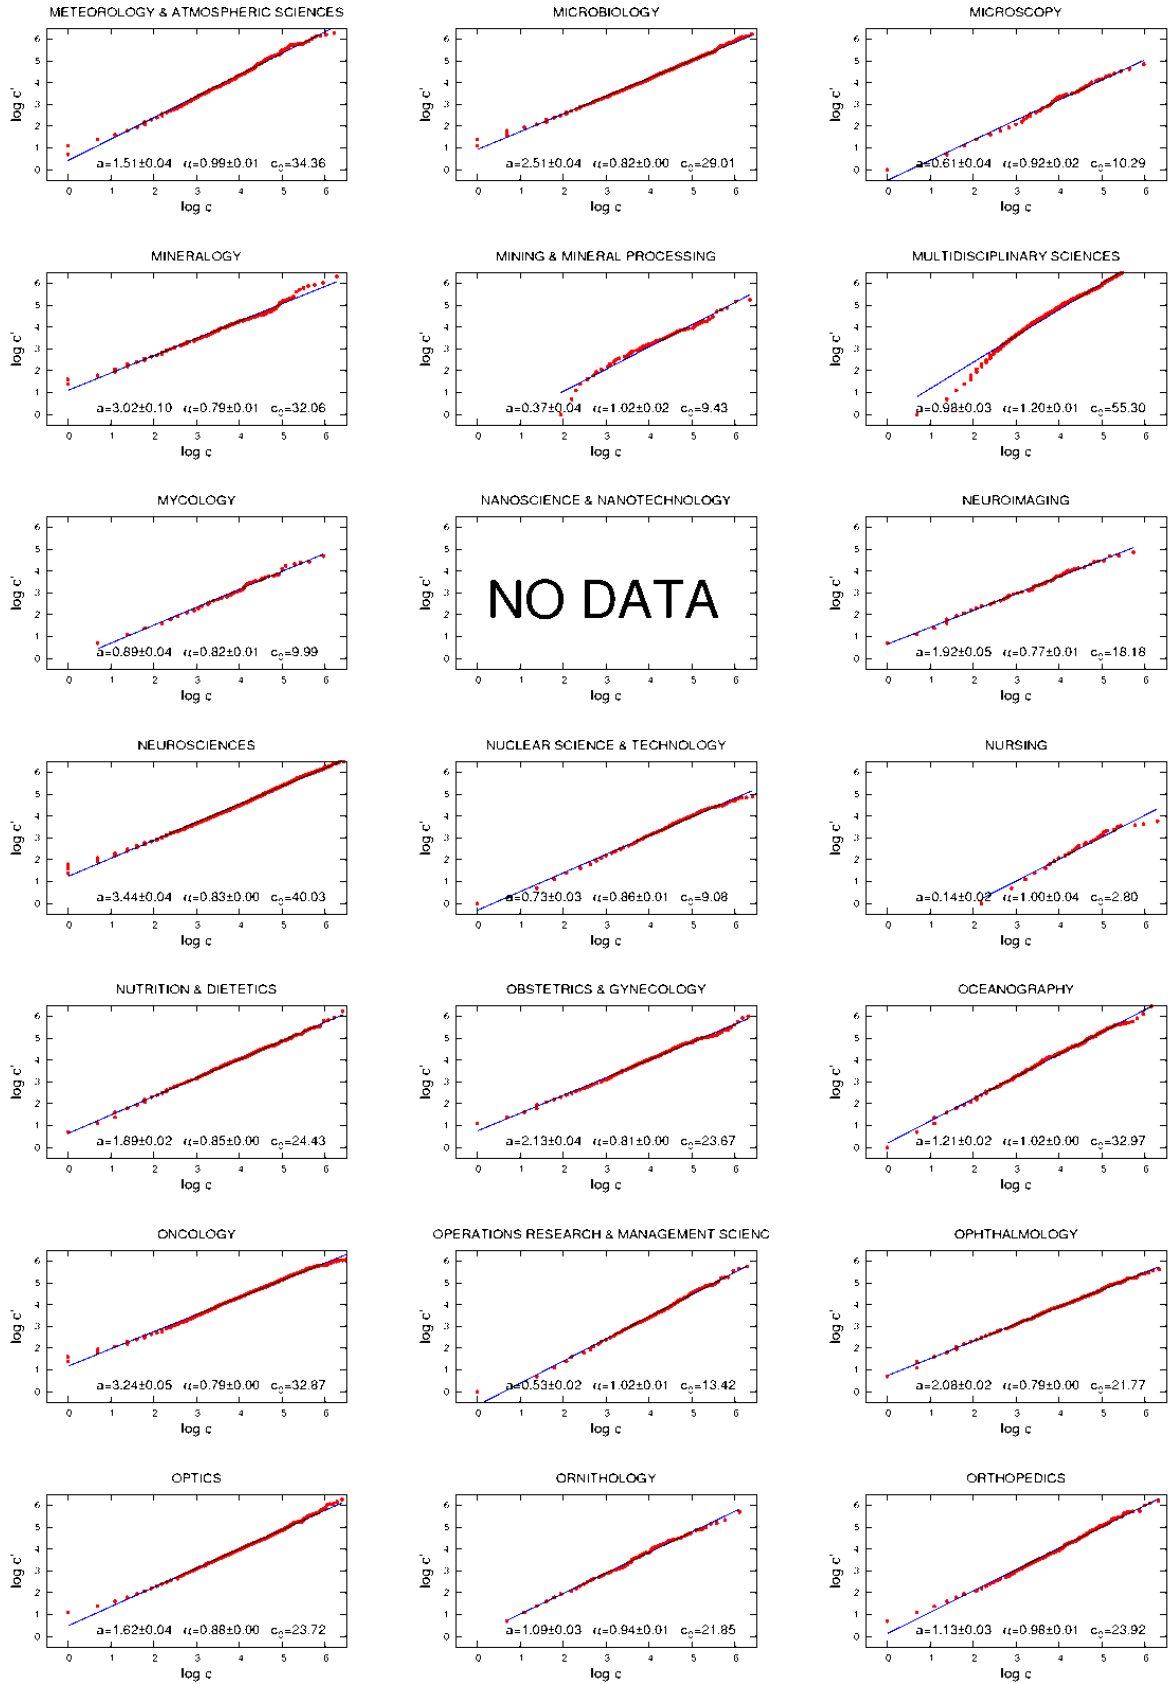

Figure S6: Publication year 1980.

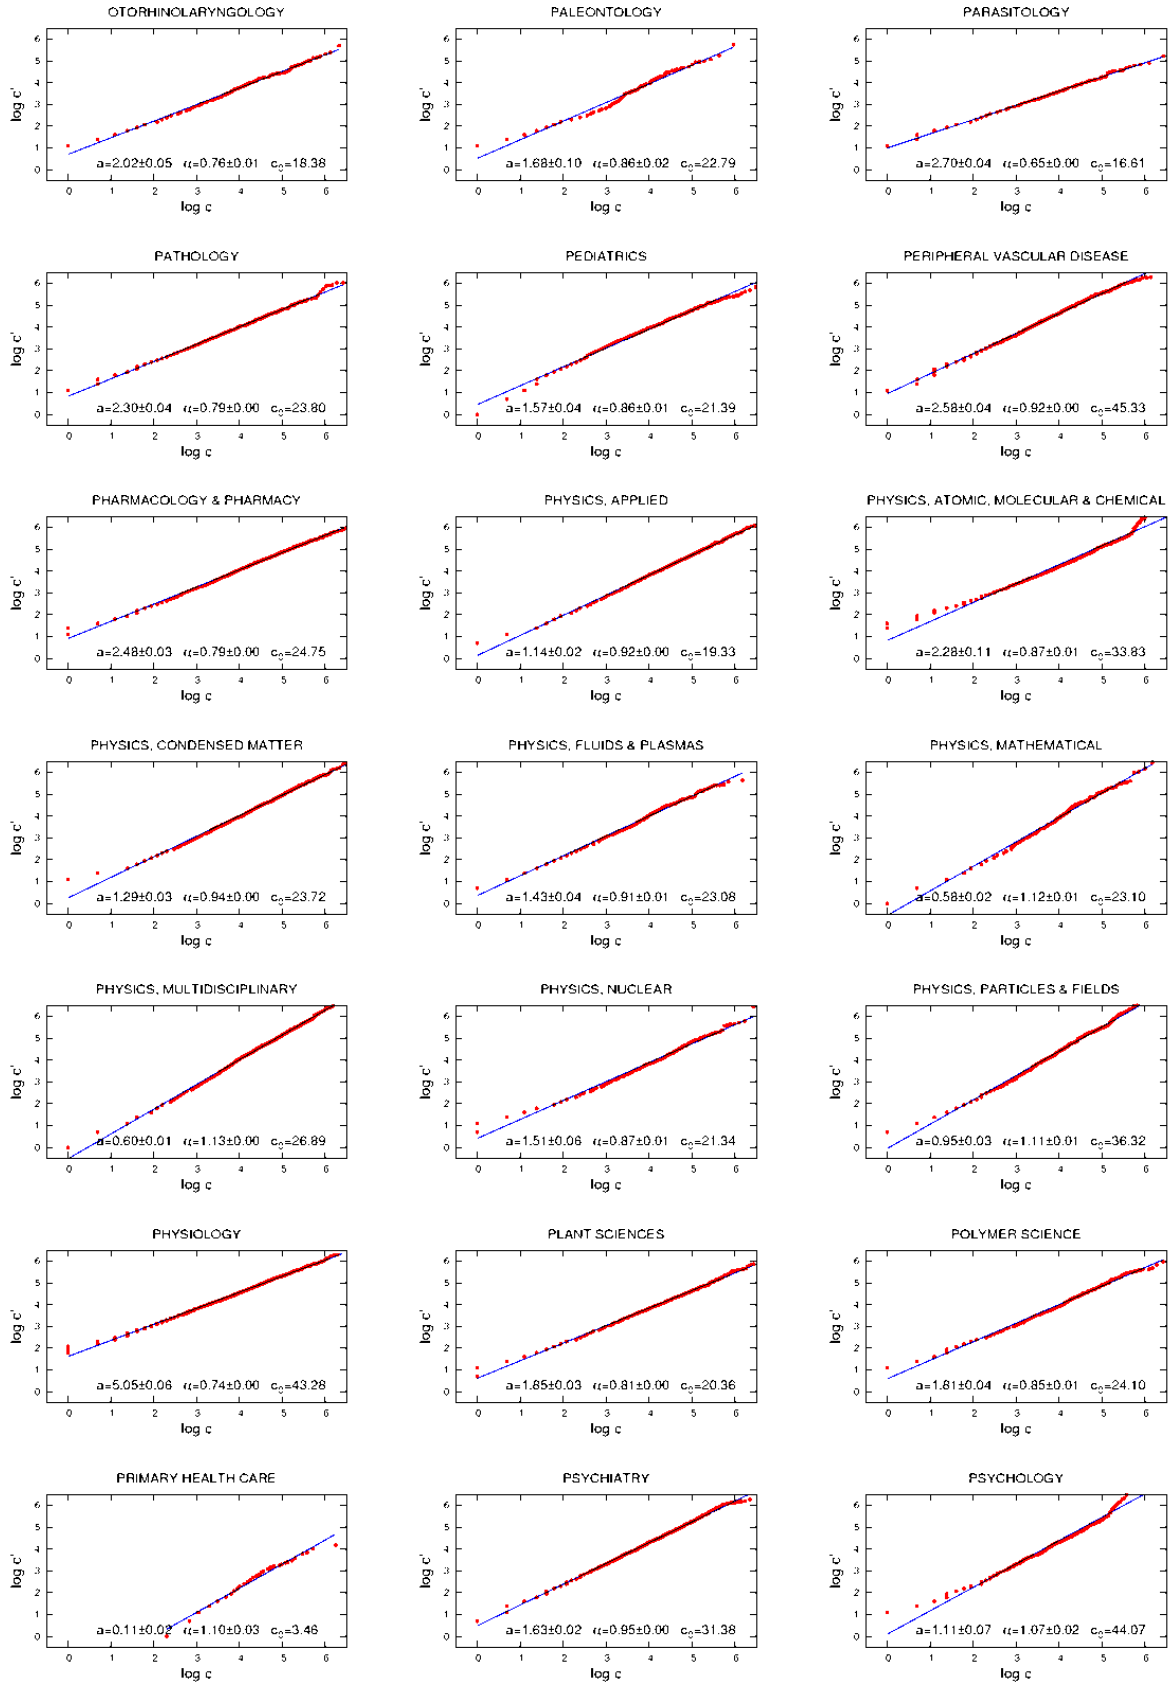

Figure S7: Publication year 1980.

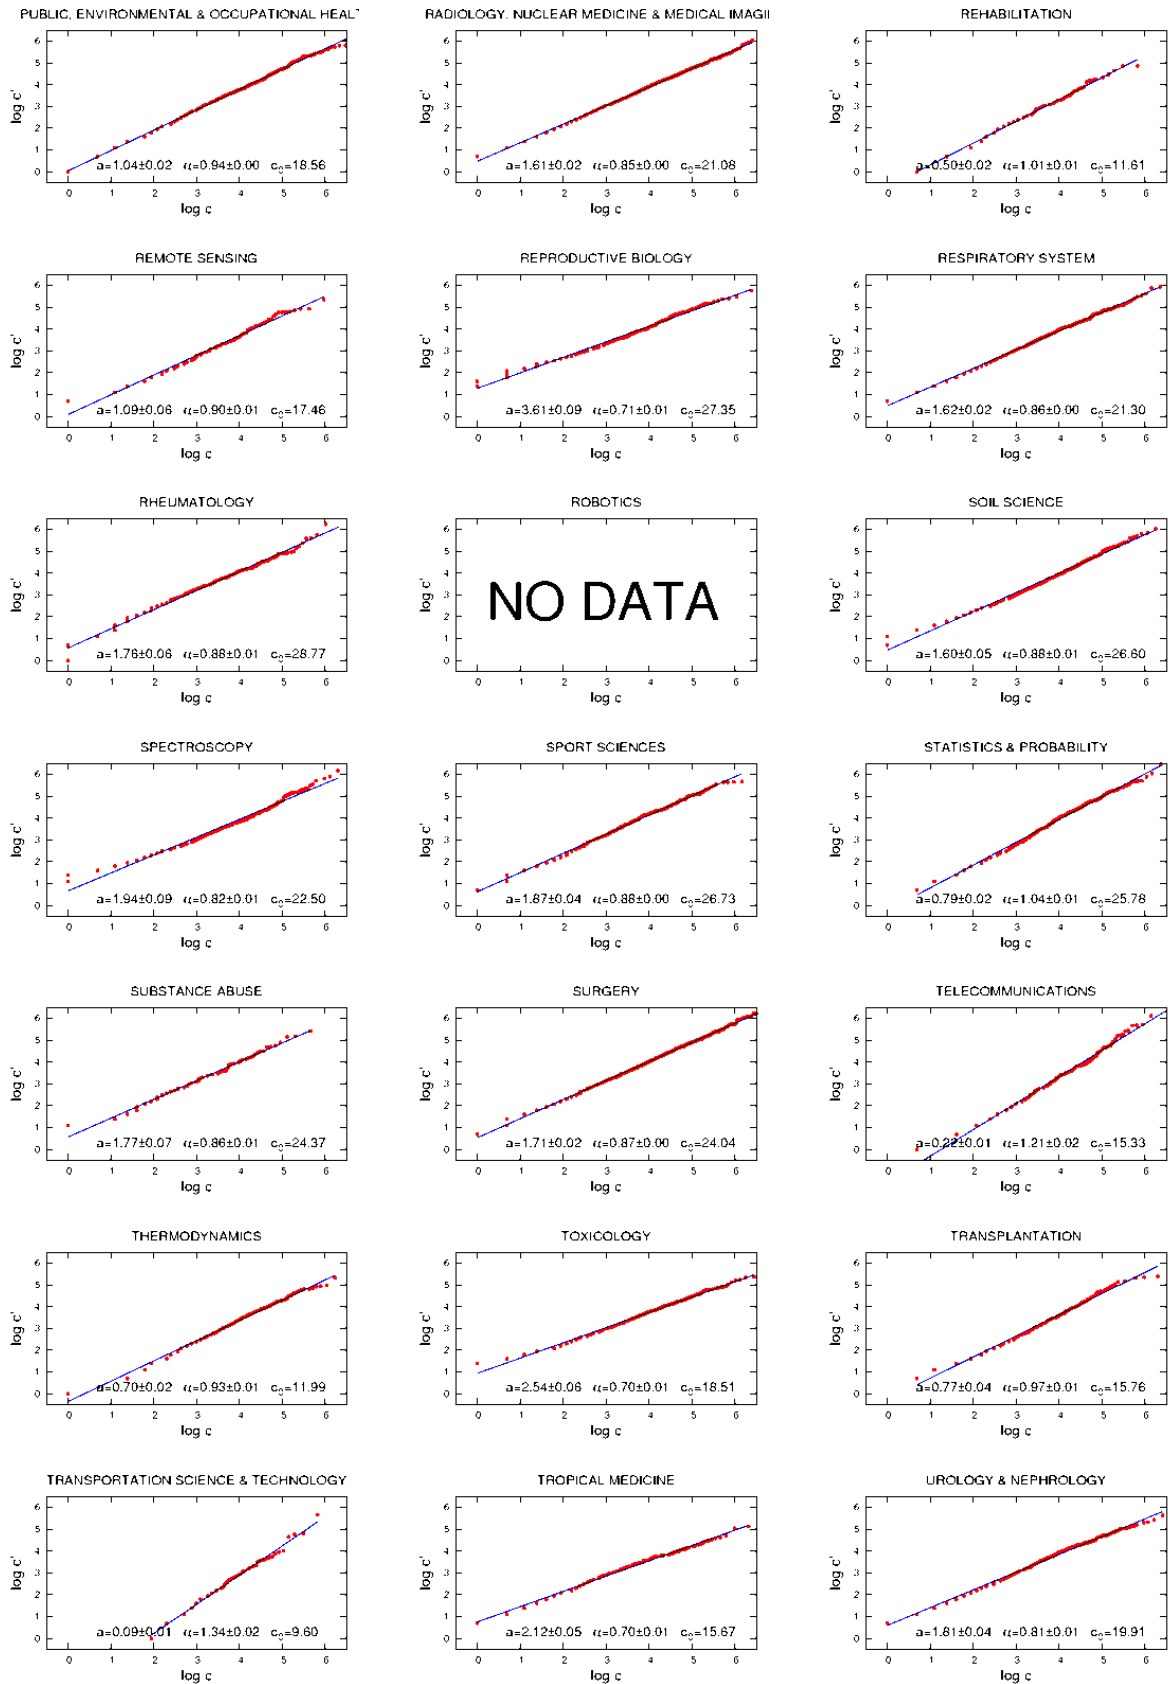

Figure S8: Publication year 1980.



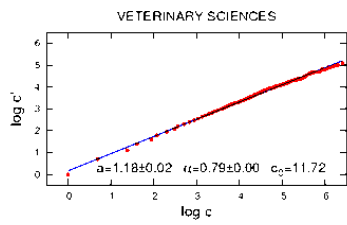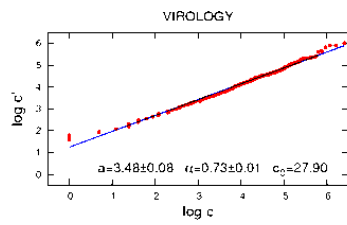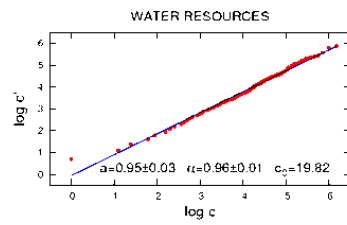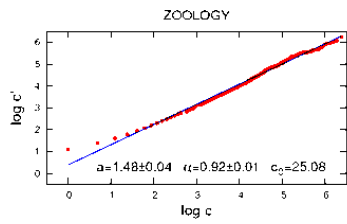

Figure S9: Publication year 1980.

| Subject-category                                 | $a$             | $\alpha$        | $\langle c \rangle$ | $N$    |
|--------------------------------------------------|-----------------|-----------------|---------------------|--------|
| ACOUSTICS                                        | $0.63 \pm 0.02$ | $1.05 \pm 0.01$ | 17.61               | 1,232  |
| AGRICULTURAL ECONOMICS & POLICY                  | $0.30 \pm 0.04$ | $1.00 \pm 0.03$ | 6.96                | 444    |
| AGRICULTURE, DAIRY & ANIMAL SCIENCE              | $0.98 \pm 0.02$ | $0.89 \pm 0.00$ | 14.68               | 1,763  |
| AGRICULTURE, MULTIDISCIPLINARY                   | $0.69 \pm 0.02$ | $0.93 \pm 0.01$ | 12.52               | 1,518  |
| AGRONOMY                                         | $1.22 \pm 0.03$ | $0.81 \pm 0.01$ | 13.33               | 1,858  |
| ALLERGY                                          | $1.87 \pm 0.05$ | $0.82 \pm 0.01$ | 20.99               | 461    |
| ANATOMY & MORPHOLOGY                             | $3.55 \pm 0.14$ | $0.64 \pm 0.01$ | 20.98               | 305    |
| ANDROLOGY                                        | $1.81 \pm 0.05$ | $0.69 \pm 0.01$ | 12.79               | 161    |
| ANESTHESIOLOGY                                   | $1.09 \pm 0.04$ | $0.92 \pm 0.01$ | 18.52               | 1,375  |
| ASTRONOMY & ASTROPHYSICS                         | $2.01 \pm 0.05$ | $0.93 \pm 0.01$ | 35.73               | 4,146  |
| AUTOMATION & CONTROL SYSTEMS                     | $0.19 \pm 0.01$ | $1.24 \pm 0.01$ | 12.07               | 1,082  |
| BEHAVIORAL SCIENCES                              | $1.63 \pm 0.03$ | $0.89 \pm 0.00$ | 24.87               | 1,908  |
| BIOCHEMICAL RESEARCH METHODS                     | $0.92 \pm 0.09$ | $1.11 \pm 0.02$ | 47.38               | 1,589  |
| BIOCHEMISTRY & MOLECULAR BIOLOGY                 | $2.53 \pm 0.06$ | $0.91 \pm 0.00$ | 42.99               | 14,673 |
| BIODIVERSITY CONSERVATION                        | $0.50 \pm 0.03$ | $1.00 \pm 0.01$ | 11.18               | 504    |
| BIOLOGY                                          | $0.84 \pm 0.03$ | $0.95 \pm 0.01$ | 15.60               | 2,834  |
| BIOPHYSICS                                       | $3.26 \pm 0.07$ | $0.75 \pm 0.00$ | 28.34               | 4,364  |
| BIOTECHNOLOGY & APPLIED MICROBIOLOGY             | $2.19 \pm 0.04$ | $0.78 \pm 0.00$ | 21.62               | 2,159  |
| CARDIAC & CARDIOVASCULAR SYSTEMS                 | $1.56 \pm 0.04$ | $0.98 \pm 0.01$ | 34.24               | 3,144  |
| CELL & TISSUE ENGINEERING                        | —               | —               | —                   | 0      |
| CELL BIOLOGY                                     | $2.40 \pm 0.06$ | $0.93 \pm 0.01$ | 42.42               | 5,255  |
| CHEMISTRY, ANALYTICAL                            | $0.96 \pm 0.07$ | $1.01 \pm 0.02$ | 30.14               | 3,174  |
| CHEMISTRY, APPLIED                               | $1.66 \pm 0.04$ | $0.79 \pm 0.00$ | 16.84               | 1,569  |
| CHEMISTRY, INORGANIC & NUCLEAR                   | $3.39 \pm 0.05$ | $0.68 \pm 0.00$ | 22.98               | 2,552  |
| CHEMISTRY, MEDICINAL                             | $1.38 \pm 0.08$ | $0.83 \pm 0.01$ | 16.44               | 2,185  |
| CHEMISTRY, MULTIDISCIPLINARY                     | $1.24 \pm 0.02$ | $0.96 \pm 0.00$ | 24.66               | 8,653  |
| CHEMISTRY, ORGANIC                               | $2.64 \pm 0.05$ | $0.72 \pm 0.00$ | 21.26               | 5,772  |
| CHEMISTRY, PHYSICAL                              | $1.47 \pm 0.03$ | $0.91 \pm 0.00$ | 24.57               | 6,711  |
| CLINICAL NEUROLOGY                               | $2.72 \pm 0.04$ | $0.82 \pm 0.00$ | 31.58               | 3,736  |
| COMPUTER SCIENCE, ARTIFICIAL INTELLIGENCE        | $1.68 \pm 0.09$ | $1.07 \pm 0.02$ | 57.99               | 152    |
| COMPUTER SCIENCE, CYBERNETICS                    | $0.15 \pm 0.01$ | $1.28 \pm 0.02$ | 12.05               | 197    |
| COMPUTER SCIENCE, HARDWARE & ARCHITECTURE        | $0.30 \pm 0.02$ | $1.25 \pm 0.01$ | 19.76               | 848    |
| COMPUTER SCIENCE, INFORMATION SYSTEMS            | $0.23 \pm 0.01$ | $1.23 \pm 0.02$ | 14.92               | 816    |
| COMPUTER SCIENCE, INTERDISCIPLINARY APPLICATIONS | $0.39 \pm 0.03$ | $1.11 \pm 0.01$ | 15.27               | 845    |
| COMPUTER SCIENCE, SOFTWARE ENGINEERING           | $0.40 \pm 0.01$ | $1.15 \pm 0.01$ | 17.34               | 831    |
| COMPUTER SCIENCE, THEORY & METHODS               | $0.49 \pm 0.02$ | $1.16 \pm 0.01$ | 21.82               | 722    |
| CONSTRUCTION & BUILDING TECHNOLOGY               | $0.82 \pm 0.08$ | $0.80 \pm 0.03$ | 8.37                | 146    |
| CRITICAL CARE MEDICINE                           | $1.32 \pm 0.07$ | $0.82 \pm 0.01$ | 14.85               | 609    |
| CRYSTALLOGRAPHY                                  | $1.89 \pm 0.09$ | $0.79 \pm 0.01$ | 19.52               | 1,551  |
| DENTISTRY, ORAL SURGERY & MEDICINE               | $0.73 \pm 0.02$ | $0.95 \pm 0.01$ | 13.72               | 2,077  |
| DERMATOLOGY                                      | $1.47 \pm 0.03$ | $0.83 \pm 0.00$ | 17.26               | 1,866  |
| DEVELOPMENTAL BIOLOGY                            | $4.30 \pm 0.14$ | $0.75 \pm 0.01$ | 38.92               | 546    |
| ECOLOGY                                          | $2.84 \pm 0.03$ | $0.84 \pm 0.00$ | 34.58               | 2,667  |
| EDUCATION, SCIENTIFIC DISCIPLINES                | $0.11 \pm 0.01$ | $1.11 \pm 0.02$ | 3.72                | 1,234  |
| ELECTROCHEMISTRY                                 | $2.52 \pm 0.09$ | $0.81 \pm 0.01$ | 28.28               | 1,302  |
| EMERGENCY MEDICINE                               | $0.23 \pm 0.03$ | $1.05 \pm 0.03$ | 6.38                | 306    |
| ENDOCRINOLOGY & METABOLISM                       | $4.85 \pm 0.08$ | $0.71 \pm 0.00$ | 36.50               | 3,617  |
| ENERGY & FUELS                                   | $0.07 \pm 0.01$ | $1.29 \pm 0.02$ | 5.32                | 2,294  |
| ENGINEERING, AEROSPACE                           | $0.14 \pm 0.01$ | $1.17 \pm 0.01$ | 6.32                | 918    |
| ENGINEERING, BIOMEDICAL                          | $0.63 \pm 0.03$ | $1.05 \pm 0.01$ | 18.95               | 1,018  |

Table S13: Publication year 1980.

| Subject-category                              | $a$             | $\alpha$        | $\langle c \rangle$ | $N$   |
|-----------------------------------------------|-----------------|-----------------|---------------------|-------|
| ENGINEERING, CHEMICAL                         | $0.54 \pm 0.03$ | $1.04 \pm 0.01$ | 14.33               | 3,802 |
| ENGINEERING, CIVIL                            | $0.16 \pm 0.02$ | $1.16 \pm 0.02$ | 6.92                | 1,232 |
| ENGINEERING, ELECTRICAL & ELECTRONIC          | $0.31 \pm 0.01$ | $1.17 \pm 0.01$ | 14.87               | 5,755 |
| ENGINEERING, ENVIRONMENTAL                    | $1.01 \pm 0.04$ | $0.98 \pm 0.01$ | 21.55               | 647   |
| ENGINEERING, GEOLOGICAL                       | $1.06 \pm 0.03$ | $0.90 \pm 0.01$ | 17.52               | 220   |
| ENGINEERING, INDUSTRIAL                       | $0.28 \pm 0.02$ | $1.18 \pm 0.02$ | 15.20               | 274   |
| ENGINEERING, MANUFACTURING                    | $0.00 \pm 0.00$ | $1.99 \pm 0.08$ | 4.73                | 198   |
| ENGINEERING, MARINE                           | $0.01 \pm 0.00$ | $1.43 \pm 0.13$ | 0.60                | 205   |
| ENGINEERING, MECHANICAL                       | $0.39 \pm 0.02$ | $1.00 \pm 0.01$ | 8.94                | 1,583 |
| ENGINEERING, MULTIDISCIPLINARY                | $0.04 \pm 0.00$ | $1.43 \pm 0.02$ | 5.74                | 2,211 |
| ENGINEERING, OCEAN                            | $0.02 \pm 0.01$ | $1.63 \pm 0.07$ | 5.21                | 188   |
| ENGINEERING, PETROLEUM                        | $0.00 \pm 0.00$ | $1.38 \pm 0.08$ | 0.29                | 1,092 |
| ENTOMOLOGY                                    | $1.30 \pm 0.05$ | $0.77 \pm 0.01$ | 11.88               | 1,985 |
| ENVIRONMENTAL SCIENCES                        | $1.21 \pm 0.03$ | $0.88 \pm 0.01$ | 17.70               | 3,048 |
| EVOLUTIONARY BIOLOGY                          | $2.39 \pm 0.06$ | $0.88 \pm 0.01$ | 44.91               | 898   |
| FISHERIES                                     | $2.76 \pm 0.06$ | $0.79 \pm 0.01$ | 30.63               | 893   |
| FOOD SCIENCE & TECHNOLOGY                     | $1.42 \pm 0.04$ | $0.82 \pm 0.01$ | 16.56               | 2,548 |
| FORESTRY                                      | $0.44 \pm 0.02$ | $1.04 \pm 0.01$ | 11.74               | 576   |
| GASTROENTEROLOGY & HEPATOLOGY                 | $1.74 \pm 0.03$ | $0.93 \pm 0.00$ | 30.52               | 1,708 |
| GENETICS & HEREDITY                           | $1.88 \pm 0.07$ | $0.90 \pm 0.01$ | 34.32               | 2,515 |
| GEOCHEMISTRY & GEOPHYSICS                     | $2.00 \pm 0.03$ | $0.92 \pm 0.00$ | 33.18               | 2,177 |
| GEOGRAPHY, PHYSICAL                           | $2.16 \pm 0.06$ | $0.79 \pm 0.01$ | 22.24               | 428   |
| GEOLOGY                                       | $2.14 \pm 0.05$ | $0.81 \pm 0.01$ | 23.72               | 413   |
| GEOSCIENCES, MULTIDISCIPLINARY                | $1.91 \pm 0.04$ | $0.83 \pm 0.00$ | 23.00               | 2,026 |
| GERIATRICS & GERONTOLOGY                      | $1.27 \pm 0.04$ | $0.87 \pm 0.01$ | 17.66               | 599   |
| HEALTH CARE SCIENCES & SERVICES               | $0.25 \pm 0.02$ | $1.06 \pm 0.01$ | 7.47                | 629   |
| HEMATOLOGY                                    | $2.31 \pm 0.04$ | $0.91 \pm 0.00$ | 39.13               | 2,725 |
| HISTORY & PHILOSOPHY OF SCIENCE               | $0.58 \pm 0.05$ | $0.87 \pm 0.02$ | 7.90                | 386   |
| IMAGING SCIENCE & PHOTOGRAPHIC TECHNOLOGY     | $0.81 \pm 0.08$ | $0.98 \pm 0.03$ | 17.98               | 128   |
| IMMUNOLOGY                                    | $1.90 \pm 0.04$ | $0.94 \pm 0.00$ | 35.61               | 6,467 |
| INFECTIOUS DISEASES                           | $2.02 \pm 0.02$ | $0.88 \pm 0.00$ | 29.48               | 1,561 |
| INSTRUMENTS & INSTRUMENTATION                 | $0.12 \pm 0.02$ | $1.17 \pm 0.03$ | 4.98                | 2,197 |
| INTEGRATIVE & COMPLEMENTARY MEDICINE          | $0.71 \pm 0.06$ | $0.75 \pm 0.02$ | 6.21                | 97    |
| LIMNOLOGY                                     | $3.85 \pm 0.13$ | $0.87 \pm 0.01$ | 65.88               | 277   |
| MARINE & FRESHWATER BIOLOGY                   | $3.06 \pm 0.04$ | $0.74 \pm 0.00$ | 26.70               | 2,297 |
| MATERIALS SCIENCE, BIOMATERIALS               | $1.59 \pm 0.16$ | $0.91 \pm 0.03$ | 31.11               | 36    |
| MATERIALS SCIENCE, CERAMICS                   | $0.73 \pm 0.03$ | $1.03 \pm 0.01$ | 19.73               | 1,076 |
| MATERIALS SCIENCE, CHARACTERIZATION & TESTING | $0.21 \pm 0.02$ | $0.99 \pm 0.02$ | 4.66                | 442   |
| MATERIALS SCIENCE, COATINGS & FILMS           | $2.50 \pm 0.07$ | $0.77 \pm 0.01$ | 24.02               | 1,152 |
| MATERIALS SCIENCE, COMPOSITES                 | $2.47 \pm 0.26$ | $0.73 \pm 0.04$ | 21.32               | 28    |
| MATERIALS SCIENCE, MULTIDISCIPLINARY          | $0.73 \pm 0.01$ | $0.95 \pm 0.00$ | 13.77               | 5,489 |
| MATERIALS SCIENCE, PAPER & WOOD               | $0.14 \pm 0.01$ | $1.17 \pm 0.02$ | 6.26                | 349   |
| MATERIALS SCIENCE, TEXTILES                   | $0.52 \pm 0.04$ | $0.78 \pm 0.02$ | 4.83                | 235   |
| MATHEMATICAL & COMPUTATIONAL BIOLOGY          | $1.26 \pm 0.06$ | $0.92 \pm 0.01$ | 20.33               | 834   |
| MATHEMATICS                                   | $0.38 \pm 0.01$ | $1.05 \pm 0.01$ | 10.44               | 5,421 |
| MATHEMATICS, APPLIED                          | $0.41 \pm 0.02$ | $1.09 \pm 0.01$ | 14.07               | 2,480 |
| MATHEMATICS, INTERDISCIPLINARY APPLICATIONS   | $0.42 \pm 0.02$ | $1.14 \pm 0.01$ | 22.21               | 1,323 |
| MECHANICS                                     | $0.77 \pm 0.02$ | $0.99 \pm 0.01$ | 16.99               | 2,893 |
| MEDICAL ETHICS                                | $0.18 \pm 0.04$ | $0.88 \pm 0.05$ | 2.34                | 143   |
| MEDICAL INFORMATICS                           | $0.61 \pm 0.05$ | $0.93 \pm 0.02$ | 10.43               | 162   |

Table S14: Publication year 1980.

| Subject-category                              | $a$             | $\alpha$        | $\langle c \rangle$ | $N$    |
|-----------------------------------------------|-----------------|-----------------|---------------------|--------|
| MEDICAL LABORATORY TECHNOLOGY                 | $1.79 \pm 0.06$ | $0.79 \pm 0.01$ | 18.01               | 1,379  |
| MEDICINE, GENERAL & INTERNAL                  | $0.21 \pm 0.01$ | $1.30 \pm 0.01$ | 17.08               | 14,744 |
| MEDICINE, LEGAL                               | $0.58 \pm 0.04$ | $0.80 \pm 0.01$ | 5.72                | 326    |
| MEDICINE, RESEARCH & EXPERIMENTAL             | $0.96 \pm 0.03$ | $1.08 \pm 0.01$ | 30.73               | 4,480  |
| METALLURGY & METALLURGICAL ENGINEERING        | $0.16 \pm 0.03$ | $1.13 \pm 0.04$ | 5.64                | 1,076  |
| METEOROLOGY & ATMOSPHERIC SCIENCES            | $1.51 \pm 0.04$ | $0.99 \pm 0.01$ | 34.36               | 1,123  |
| MICROBIOLOGY                                  | $2.51 \pm 0.04$ | $0.82 \pm 0.00$ | 29.01               | 4,039  |
| MICROSCOPY                                    | $0.61 \pm 0.04$ | $0.92 \pm 0.02$ | 10.29               | 334    |
| MINERALOGY                                    | $3.02 \pm 0.10$ | $0.79 \pm 0.01$ | 32.06               | 634    |
| MINING & MINERAL PROCESSING                   | $0.37 \pm 0.04$ | $1.02 \pm 0.02$ | 9.43                | 736    |
| MULTIDISCIPLINARY SCIENCES                    | $0.98 \pm 0.03$ | $1.20 \pm 0.01$ | 55.30               | 4,879  |
| MYCOLOGY                                      | $0.89 \pm 0.04$ | $0.82 \pm 0.01$ | 9.99                | 329    |
| NANOSCIENCE & NANOTECHNOLOGY                  | —               | —               | —                   | 0      |
| NEUROIMAGING                                  | $1.92 \pm 0.05$ | $0.77 \pm 0.01$ | 18.18               | 203    |
| NEUROSCIENCES                                 | $3.44 \pm 0.04$ | $0.83 \pm 0.00$ | 40.03               | 7,751  |
| NUCLEAR SCIENCE & TECHNOLOGY                  | $0.73 \pm 0.03$ | $0.86 \pm 0.01$ | 9.08                | 2,477  |
| NURSING                                       | $0.14 \pm 0.02$ | $1.00 \pm 0.04$ | 2.80                | 660    |
| NUTRITION & DIETETICS                         | $1.89 \pm 0.02$ | $0.85 \pm 0.00$ | 24.43               | 1,677  |
| OBSTETRICS & GYNECOLOGY                       | $2.13 \pm 0.04$ | $0.81 \pm 0.00$ | 23.67               | 2,060  |
| OCEANOGRAPHY                                  | $1.21 \pm 0.02$ | $1.02 \pm 0.00$ | 32.97               | 979    |
| ONCOLOGY                                      | $3.24 \pm 0.05$ | $0.79 \pm 0.00$ | 32.87               | 4,938  |
| OPERATIONS RESEARCH & MANAGEMENT SCIENCE      | $0.53 \pm 0.02$ | $1.02 \pm 0.01$ | 13.42               | 1,297  |
| OPHTHALMOLOGY                                 | $2.08 \pm 0.02$ | $0.79 \pm 0.00$ | 21.77               | 2,123  |
| OPTICS                                        | $1.62 \pm 0.04$ | $0.88 \pm 0.00$ | 23.72               | 3,226  |
| ORNITHOLOGY                                   | $1.09 \pm 0.03$ | $0.94 \pm 0.01$ | 21.85               | 443    |
| ORTHOPEDICS                                   | $1.13 \pm 0.03$ | $0.98 \pm 0.01$ | 23.92               | 1,383  |
| OTORHINOLARYNGOLOGY                           | $2.02 \pm 0.05$ | $0.76 \pm 0.01$ | 18.38               | 1,413  |
| PALEONTOLOGY                                  | $1.68 \pm 0.10$ | $0.86 \pm 0.02$ | 22.79               | 330    |
| PARASITOLOGY                                  | $2.70 \pm 0.04$ | $0.65 \pm 0.00$ | 16.61               | 858    |
| PATHOLOGY                                     | $2.30 \pm 0.04$ | $0.79 \pm 0.00$ | 23.80               | 2,557  |
| PEDIATRICS                                    | $1.57 \pm 0.04$ | $0.86 \pm 0.01$ | 21.39               | 2,936  |
| PERIPHERAL VASCULAR DISEASE                   | $2.58 \pm 0.04$ | $0.92 \pm 0.00$ | 45.33               | 1,929  |
| PHARMACOLOGY & PHARMACY                       | $2.48 \pm 0.03$ | $0.79 \pm 0.00$ | 24.75               | 10,063 |
| PHYSICS, APPLIED                              | $1.14 \pm 0.02$ | $0.92 \pm 0.00$ | 19.33               | 6,240  |
| PHYSICS, ATOMIC, MOLECULAR & CHEMICAL         | $2.28 \pm 0.11$ | $0.87 \pm 0.01$ | 33.83               | 5,959  |
| PHYSICS, CONDENSED MATTER                     | $1.29 \pm 0.03$ | $0.94 \pm 0.00$ | 23.72               | 5,820  |
| PHYSICS, FLUIDS & PLASMAS                     | $1.43 \pm 0.04$ | $0.91 \pm 0.01$ | 23.08               | 1,042  |
| PHYSICS, MATHEMATICAL                         | $0.58 \pm 0.02$ | $1.12 \pm 0.01$ | 23.10               | 1,048  |
| PHYSICS, MULTIDISCIPLINARY                    | $0.60 \pm 0.01$ | $1.13 \pm 0.00$ | 26.89               | 6,870  |
| PHYSICS, NUCLEAR                              | $1.51 \pm 0.06$ | $0.87 \pm 0.01$ | 21.34               | 1,719  |
| PHYSICS, PARTICLES & FIELDS                   | $0.95 \pm 0.03$ | $1.11 \pm 0.01$ | 36.32               | 1,480  |
| PHYSIOLOGY                                    | $5.05 \pm 0.06$ | $0.74 \pm 0.00$ | 43.28               | 3,330  |
| PLANT SCIENCES                                | $1.85 \pm 0.03$ | $0.81 \pm 0.00$ | 20.36               | 6,050  |
| POLYMER SCIENCE                               | $1.81 \pm 0.04$ | $0.85 \pm 0.01$ | 24.10               | 2,573  |
| PRIMARY HEALTH CARE                           | $0.11 \pm 0.02$ | $1.10 \pm 0.03$ | 3.46                | 595    |
| PSYCHIATRY                                    | $1.63 \pm 0.02$ | $0.95 \pm 0.00$ | 31.38               | 2,919  |
| PSYCHOLOGY                                    | $1.11 \pm 0.07$ | $1.07 \pm 0.02$ | 44.07               | 1,186  |
| PUBLIC, ENVIRONMENTAL & OCCUPATIONAL HEALTH   | $1.04 \pm 0.02$ | $0.94 \pm 0.00$ | 18.56               | 2,876  |
| RADIOLOGY, NUCLEAR MEDICINE & MEDICAL IMAGING | $1.61 \pm 0.02$ | $0.85 \pm 0.00$ | 21.08               | 4,132  |
| REHABILITATION                                | $0.50 \pm 0.02$ | $1.01 \pm 0.01$ | 11.61               | 247    |

Table S15: Publication year 1980.

| Subject-category                    | $a$                               | $\alpha$                          | $\langle c \rangle$ | $N$            |
|-------------------------------------|-----------------------------------|-----------------------------------|---------------------|----------------|
| REMOTE SENSING                      | $1.09 \pm 0.06$                   | $0.90 \pm 0.01$                   | 17.46               | 329            |
| REPRODUCTIVE BIOLOGY                | $3.61 \pm 0.09$                   | $0.71 \pm 0.01$                   | 27.35               | 780            |
| RESPIRATORY SYSTEM                  | $1.62 \pm 0.02$                   | $0.86 \pm 0.00$                   | 21.30               | 1,497          |
| RHEUMATOLOGY                        | $1.76 \pm 0.06$                   | $0.88 \pm 0.01$                   | 28.77               | 720            |
| ROBOTICS                            | —                                 | —                                 | —                   | 0              |
| SOIL SCIENCE                        | $1.60 \pm 0.05$                   | $0.88 \pm 0.01$                   | 26.60               | 1,207          |
| SPECTROSCOPY                        | $1.94 \pm 0.09$                   | $0.82 \pm 0.01$                   | 22.50               | 1,367          |
| SPORT SCIENCES                      | $1.87 \pm 0.04$                   | $0.88 \pm 0.00$                   | 26.73               | 1,008          |
| STATISTICS & PROBABILITY            | $0.79 \pm 0.02$                   | $1.04 \pm 0.01$                   | 25.78               | 1,524          |
| SUBSTANCE ABUSE                     | $1.77 \pm 0.07$                   | $0.86 \pm 0.01$                   | 24.37               | 175            |
| SURGERY                             | $1.71 \pm 0.02$                   | $0.87 \pm 0.00$                   | 24.04               | 6,954          |
| TELECOMMUNICATIONS                  | $0.22 \pm 0.01$                   | $1.21 \pm 0.02$                   | 15.33               | 967            |
| THERMODYNAMICS                      | $0.70 \pm 0.02$                   | $0.93 \pm 0.01$                   | 11.99               | 1,160          |
| TOXICOLOGY                          | $2.54 \pm 0.06$                   | $0.70 \pm 0.01$                   | 18.51               | 1,804          |
| TRANSPLANTATION                     | $0.77 \pm 0.04$                   | $0.97 \pm 0.01$                   | 15.76               | 680            |
| TRANSPORTATION SCIENCE & TECHNOLOGY | $0.09 \pm 0.01$                   | $1.34 \pm 0.02$                   | 9.60                | 250            |
| TROPICAL MEDICINE                   | $2.12 \pm 0.05$                   | $0.70 \pm 0.01$                   | 15.67               | 698            |
| UROLOGY & NEPHROLOGY                | $1.81 \pm 0.04$                   | $0.81 \pm 0.01$                   | 19.91               | 1,656          |
| VETERINARY SCIENCES                 | $1.18 \pm 0.02$                   | $0.79 \pm 0.00$                   | 11.72               | 3,318          |
| VIROLOGY                            | $3.48 \pm 0.08$                   | $0.73 \pm 0.01$                   | 27.90               | 1,648          |
| WATER RESOURCES                     | $0.95 \pm 0.03$                   | $0.96 \pm 0.01$                   | 19.82               | 1,046          |
| ZOOLOGY                             | $1.48 \pm 0.04$                   | $0.92 \pm 0.01$                   | 25.08               | 3,147          |
| <b>TOTAL</b>                        | <b><math>1.00 \pm 0.00</math></b> | <b><math>1.00 \pm 0.00</math></b> | <b>24.55</b>        | <b>355,140</b> |

Table S16: Publication year 1980.

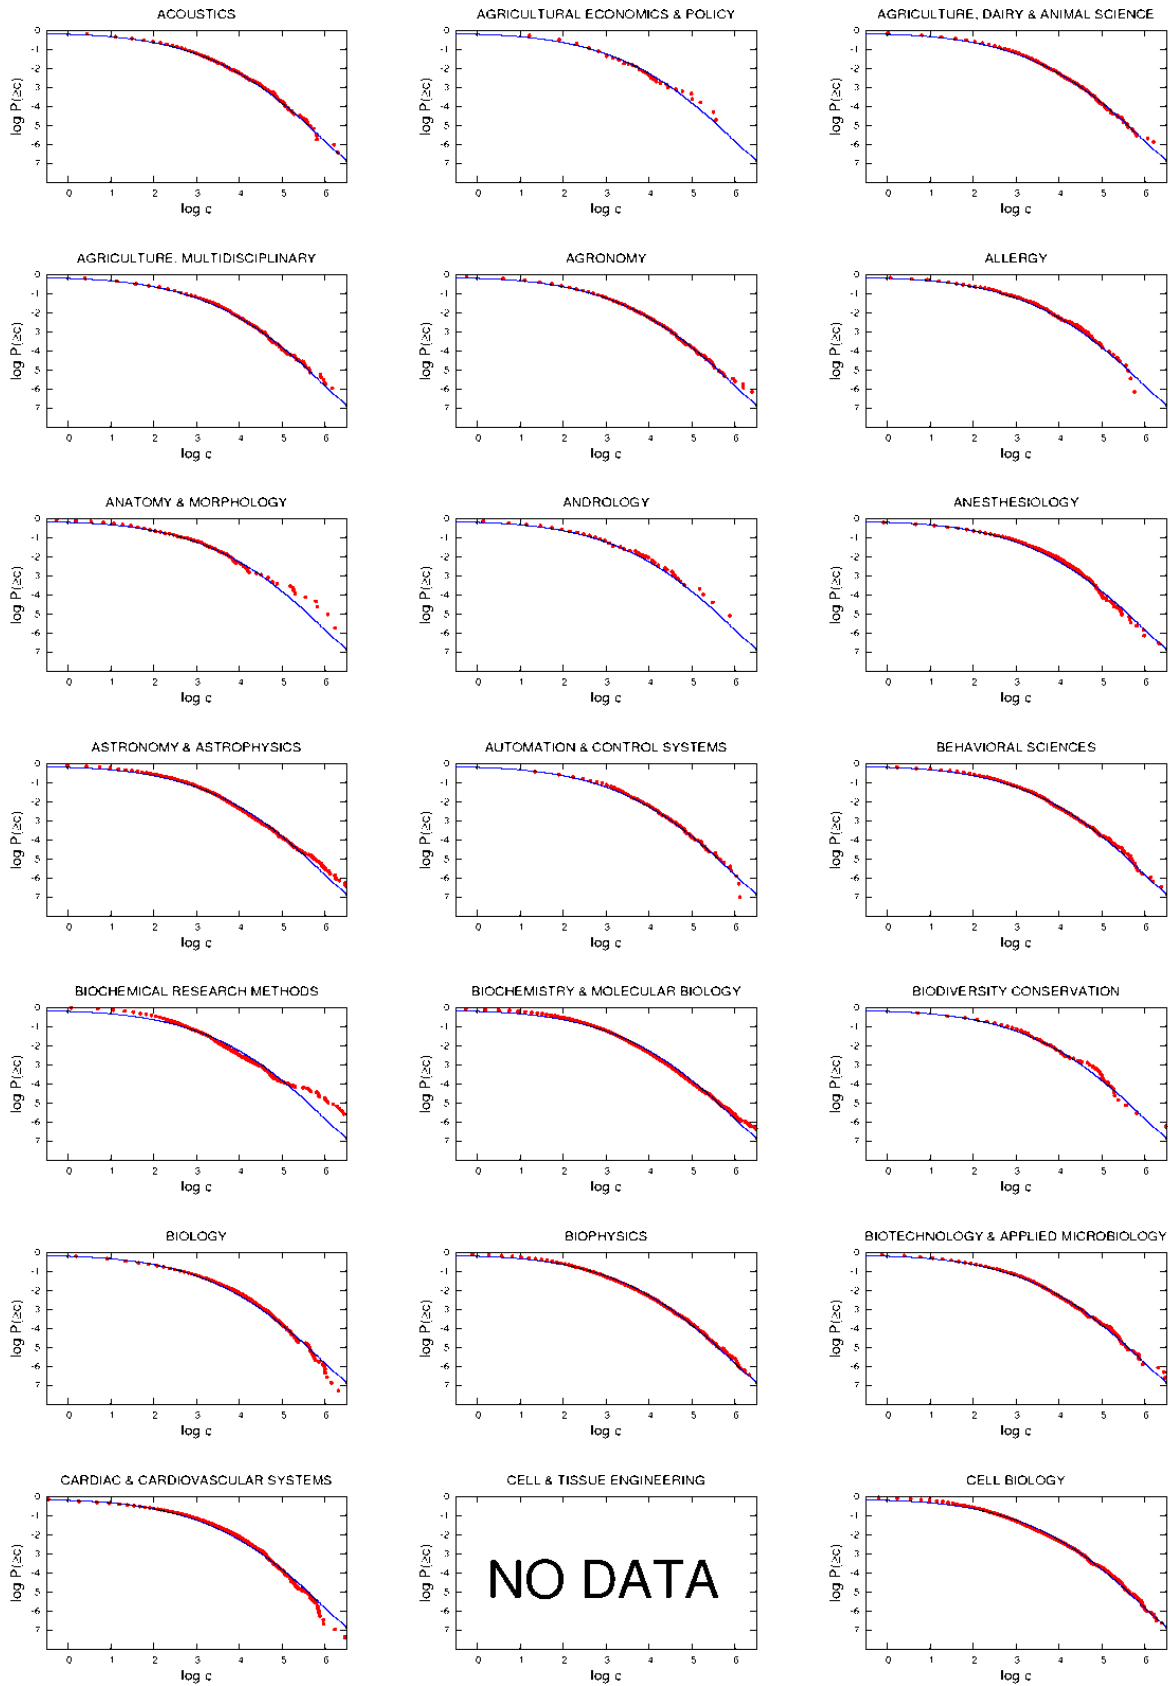

Figure S10: Publication year 1980.

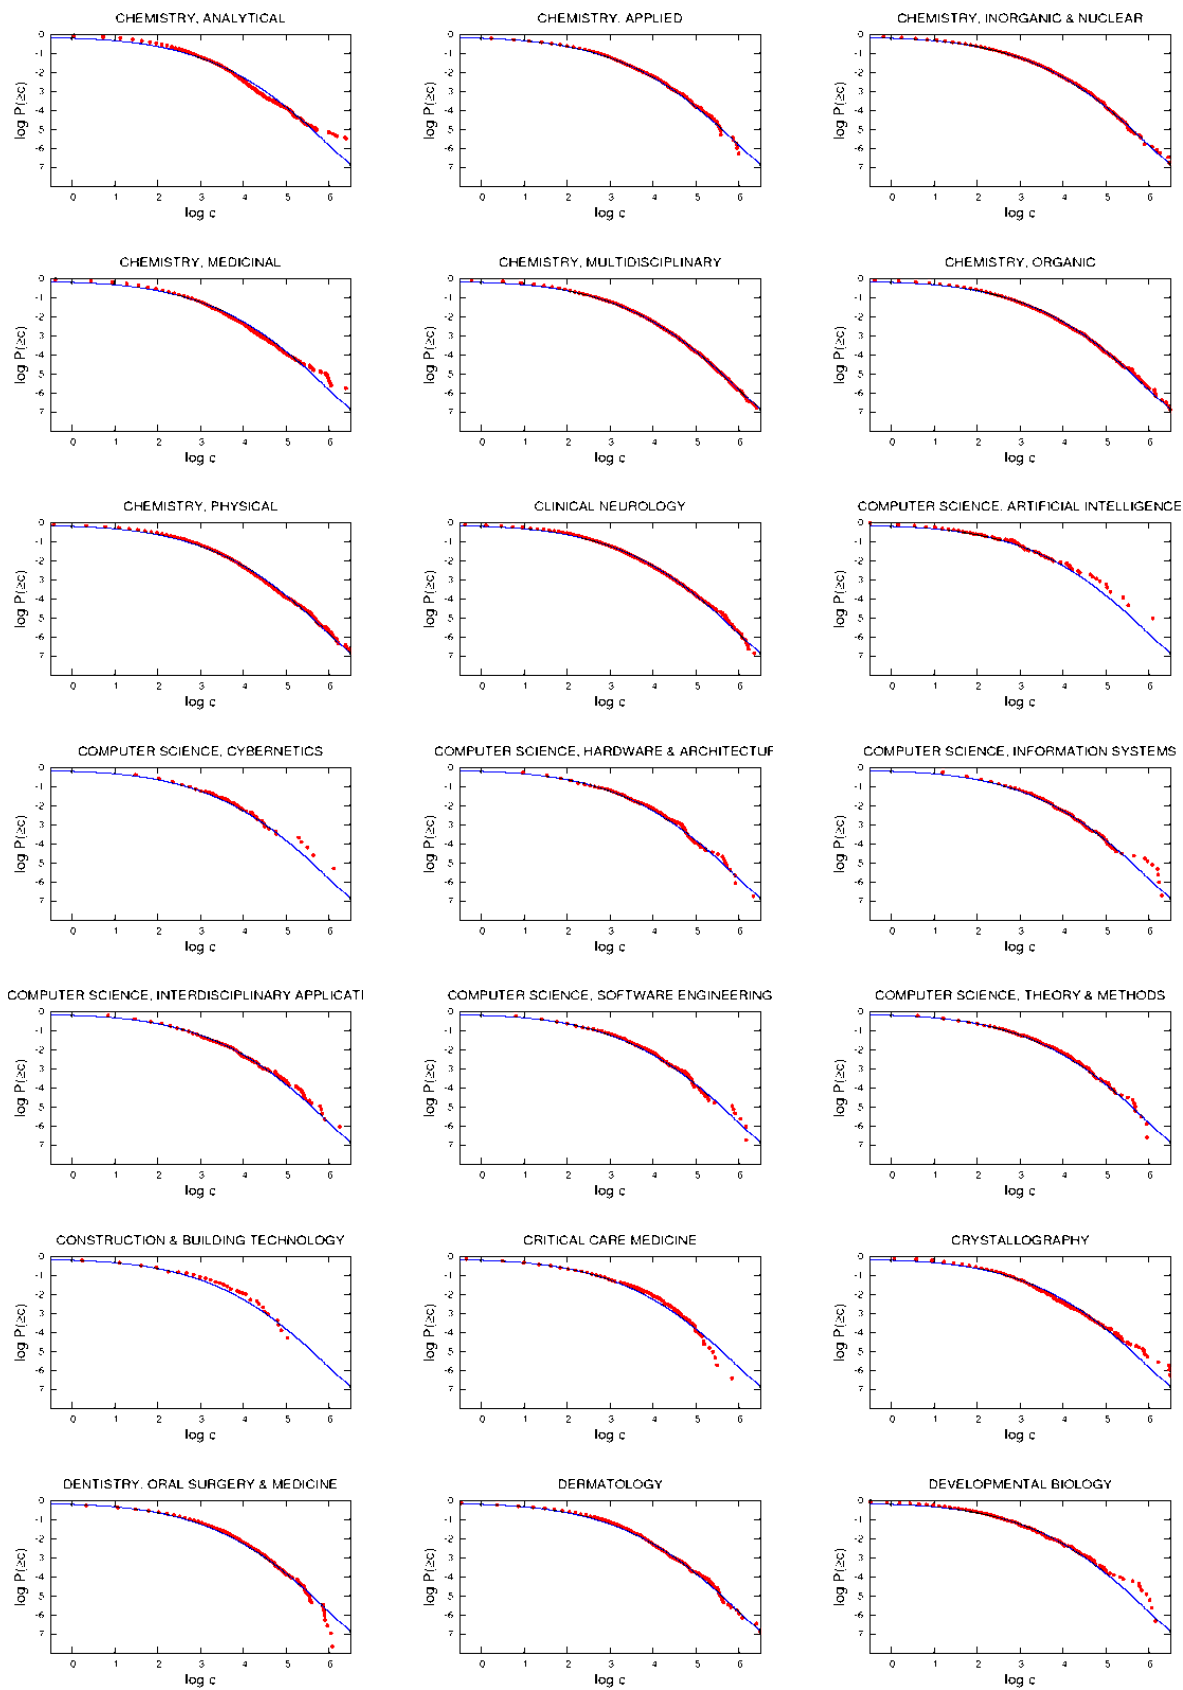

Figure S11: Publication year 1980.

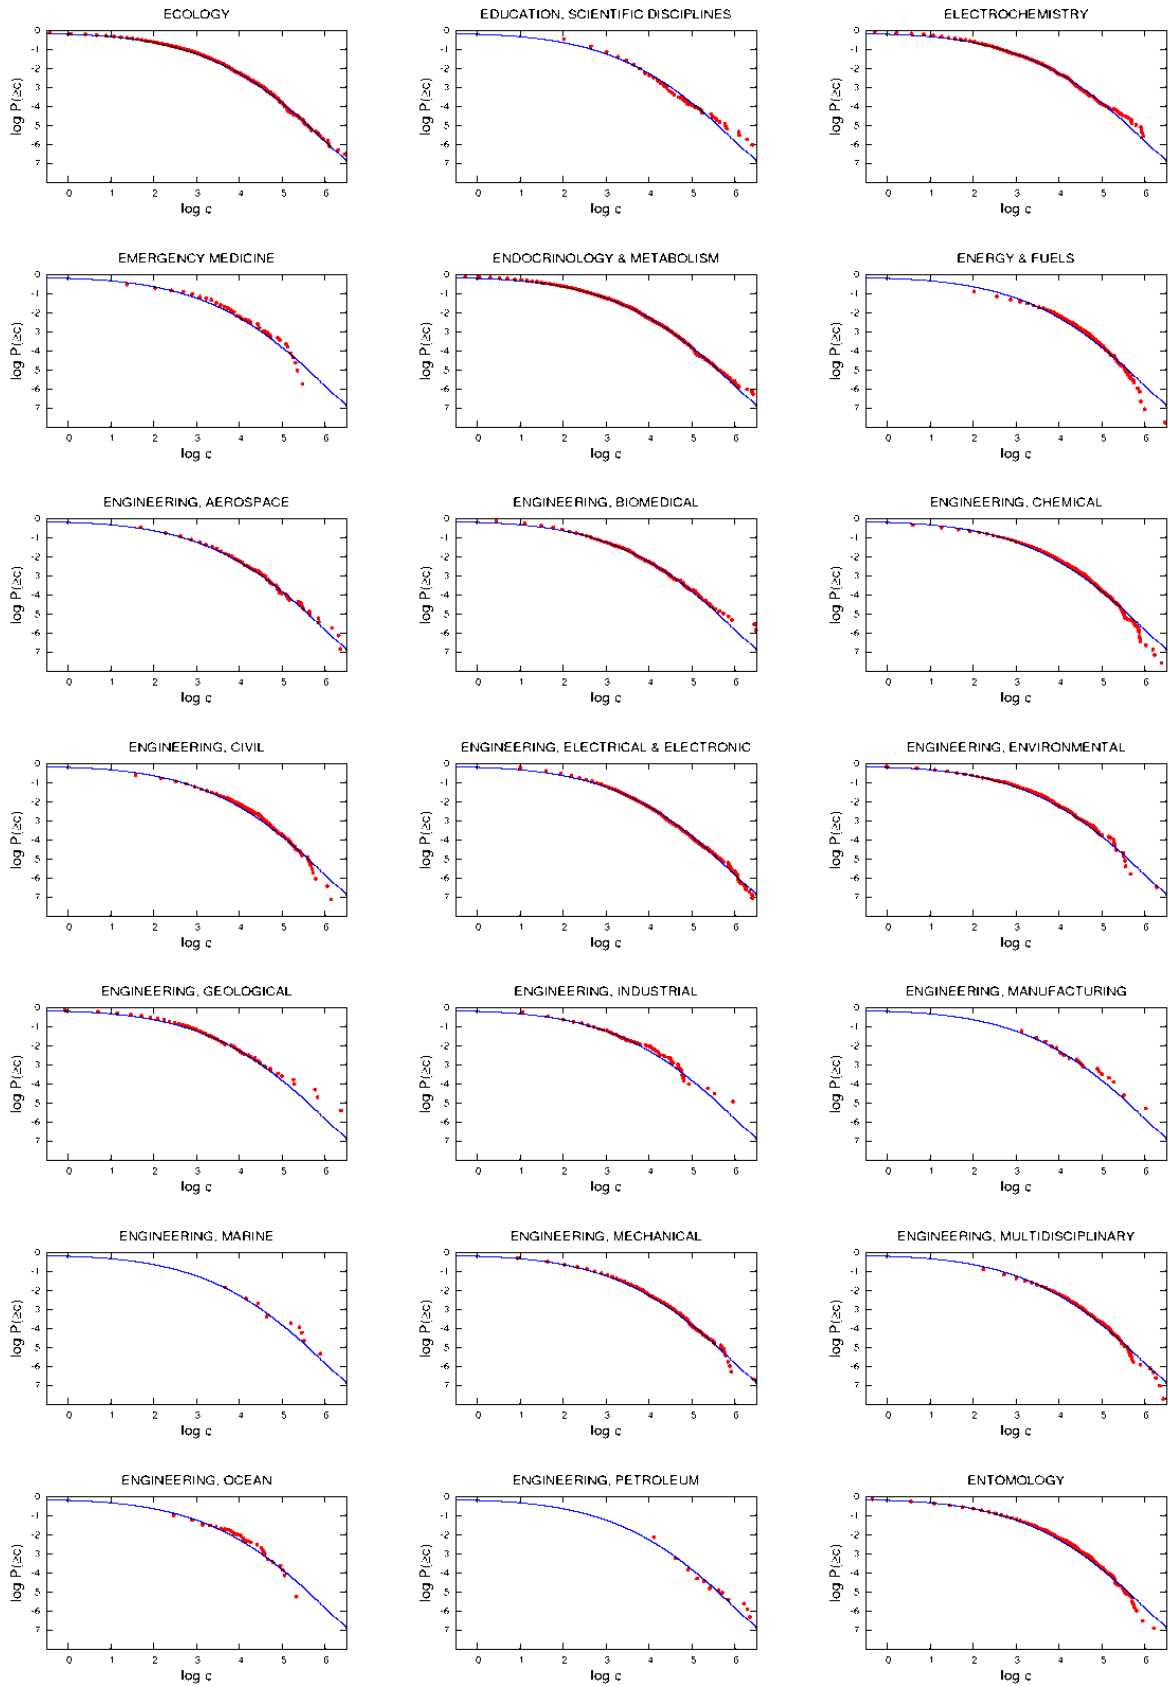

Figure S12: Publication year 1980.



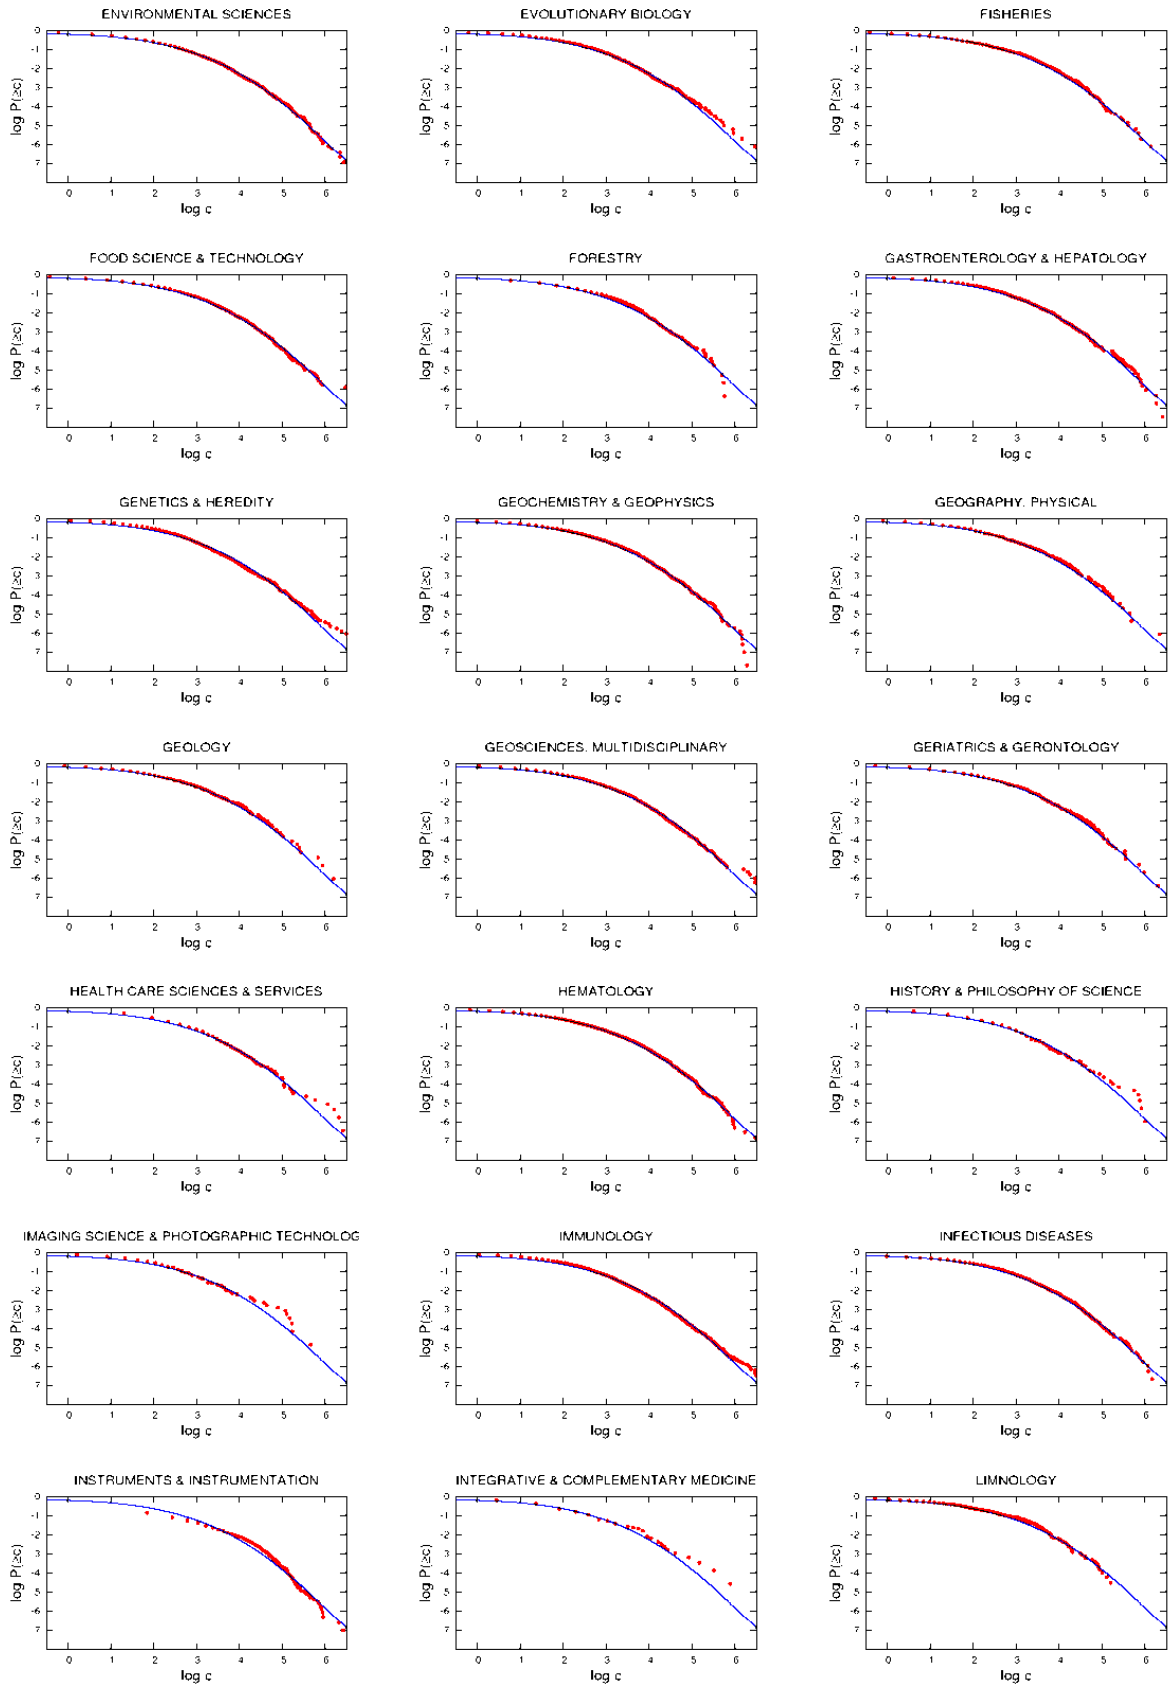

Figure S13: Publication year 1980.

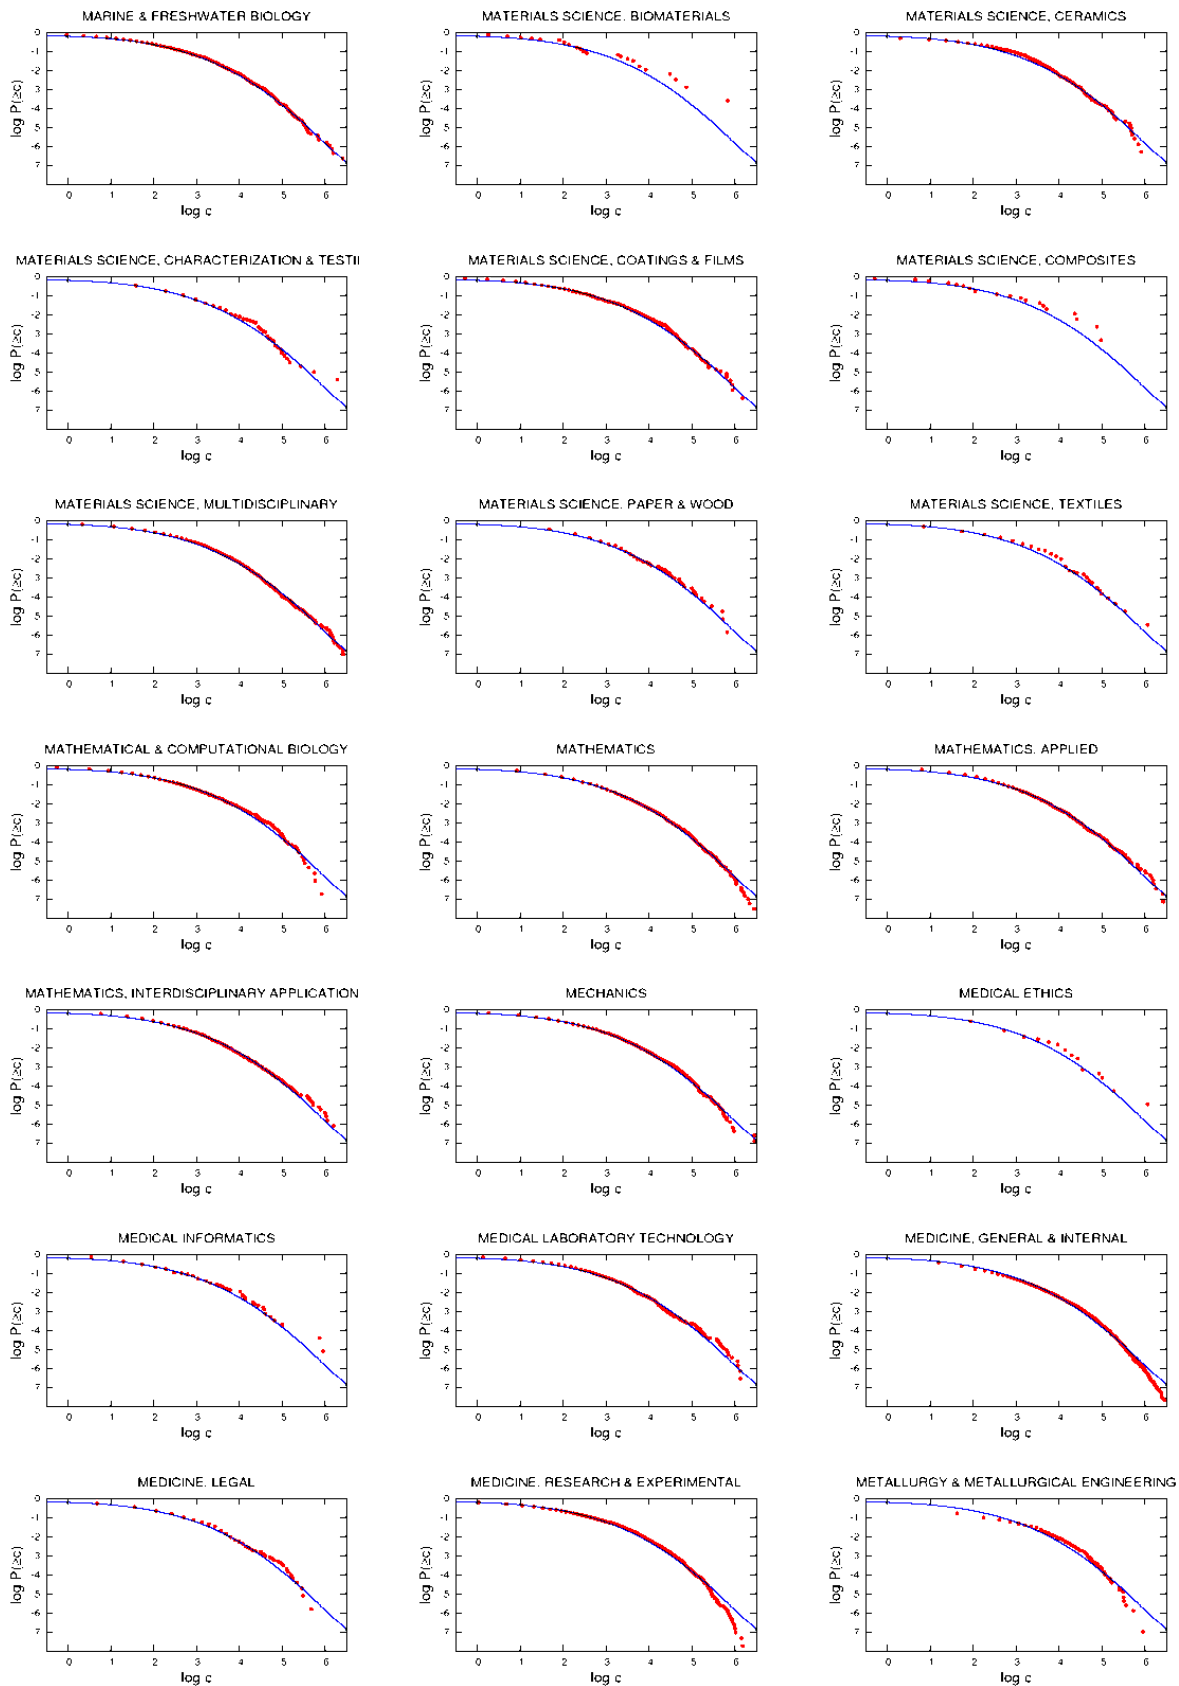

Figure S14: Publication year 1980.

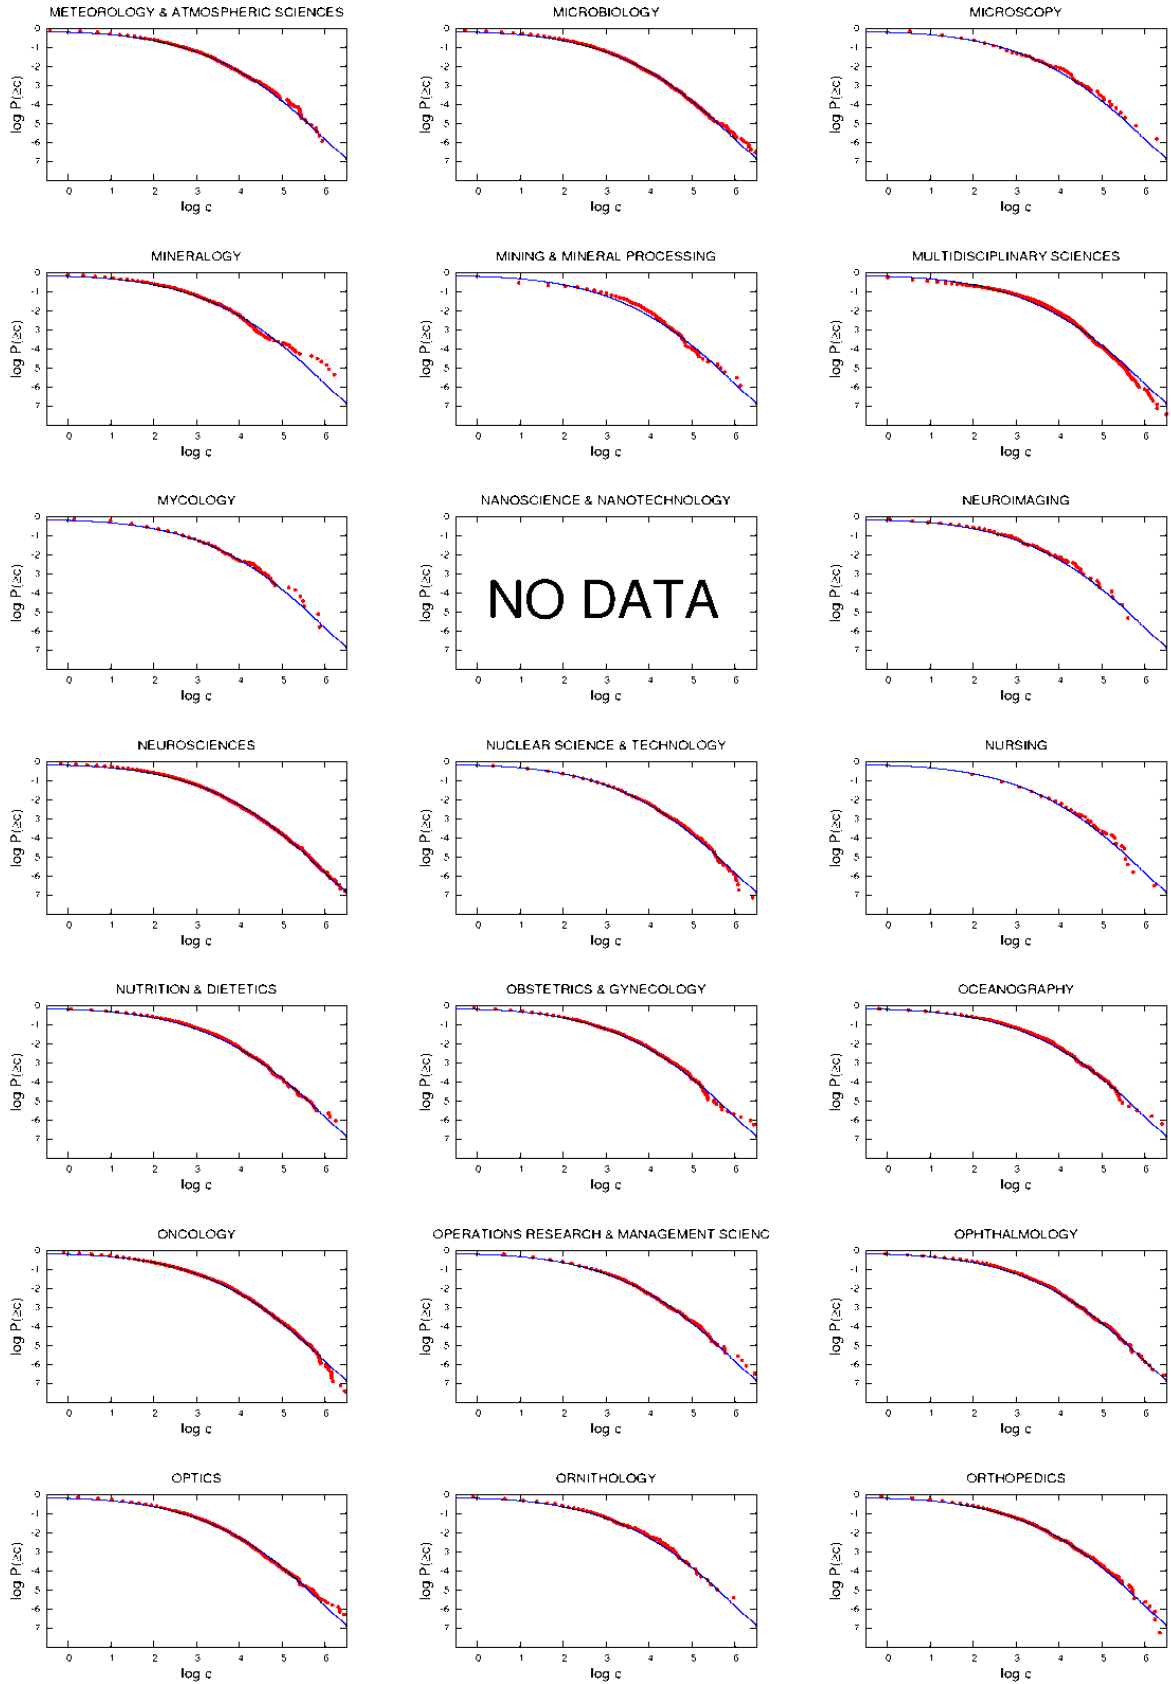

Figure S15: Publication year 1980.

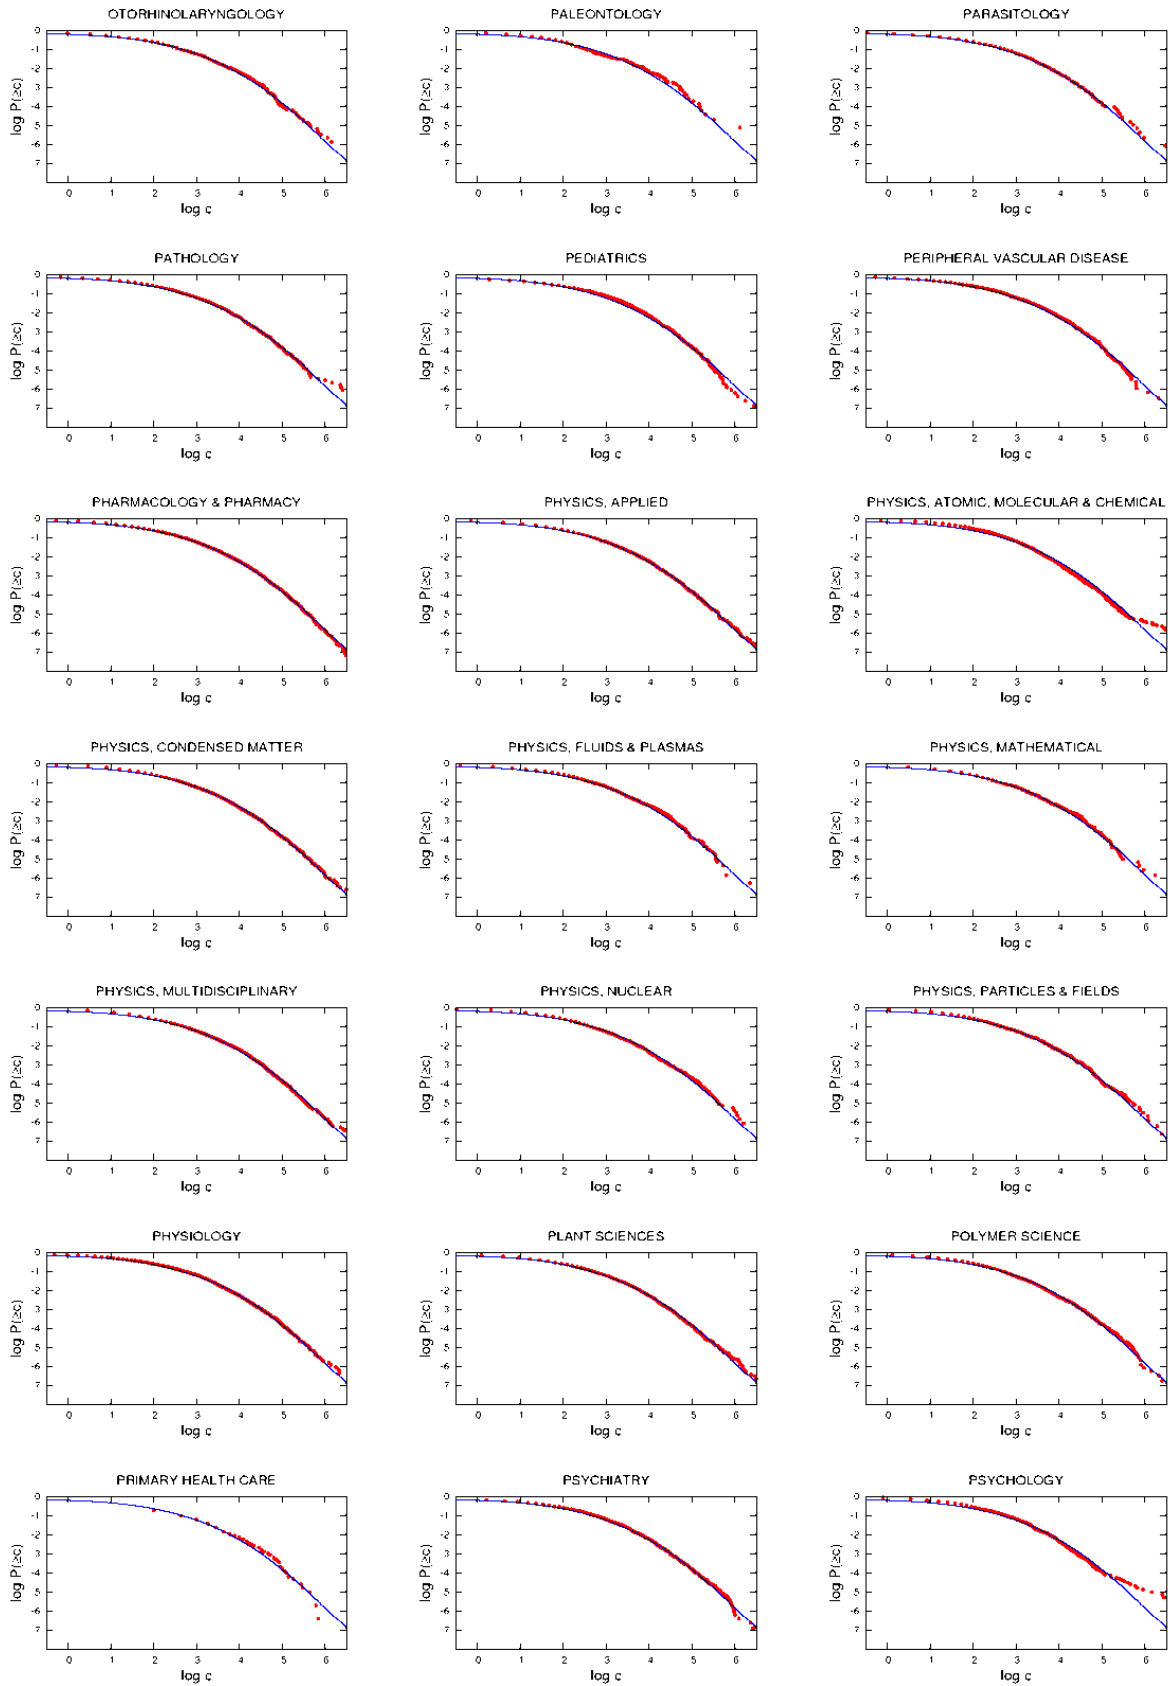

Figure S16: Publication year 1980.

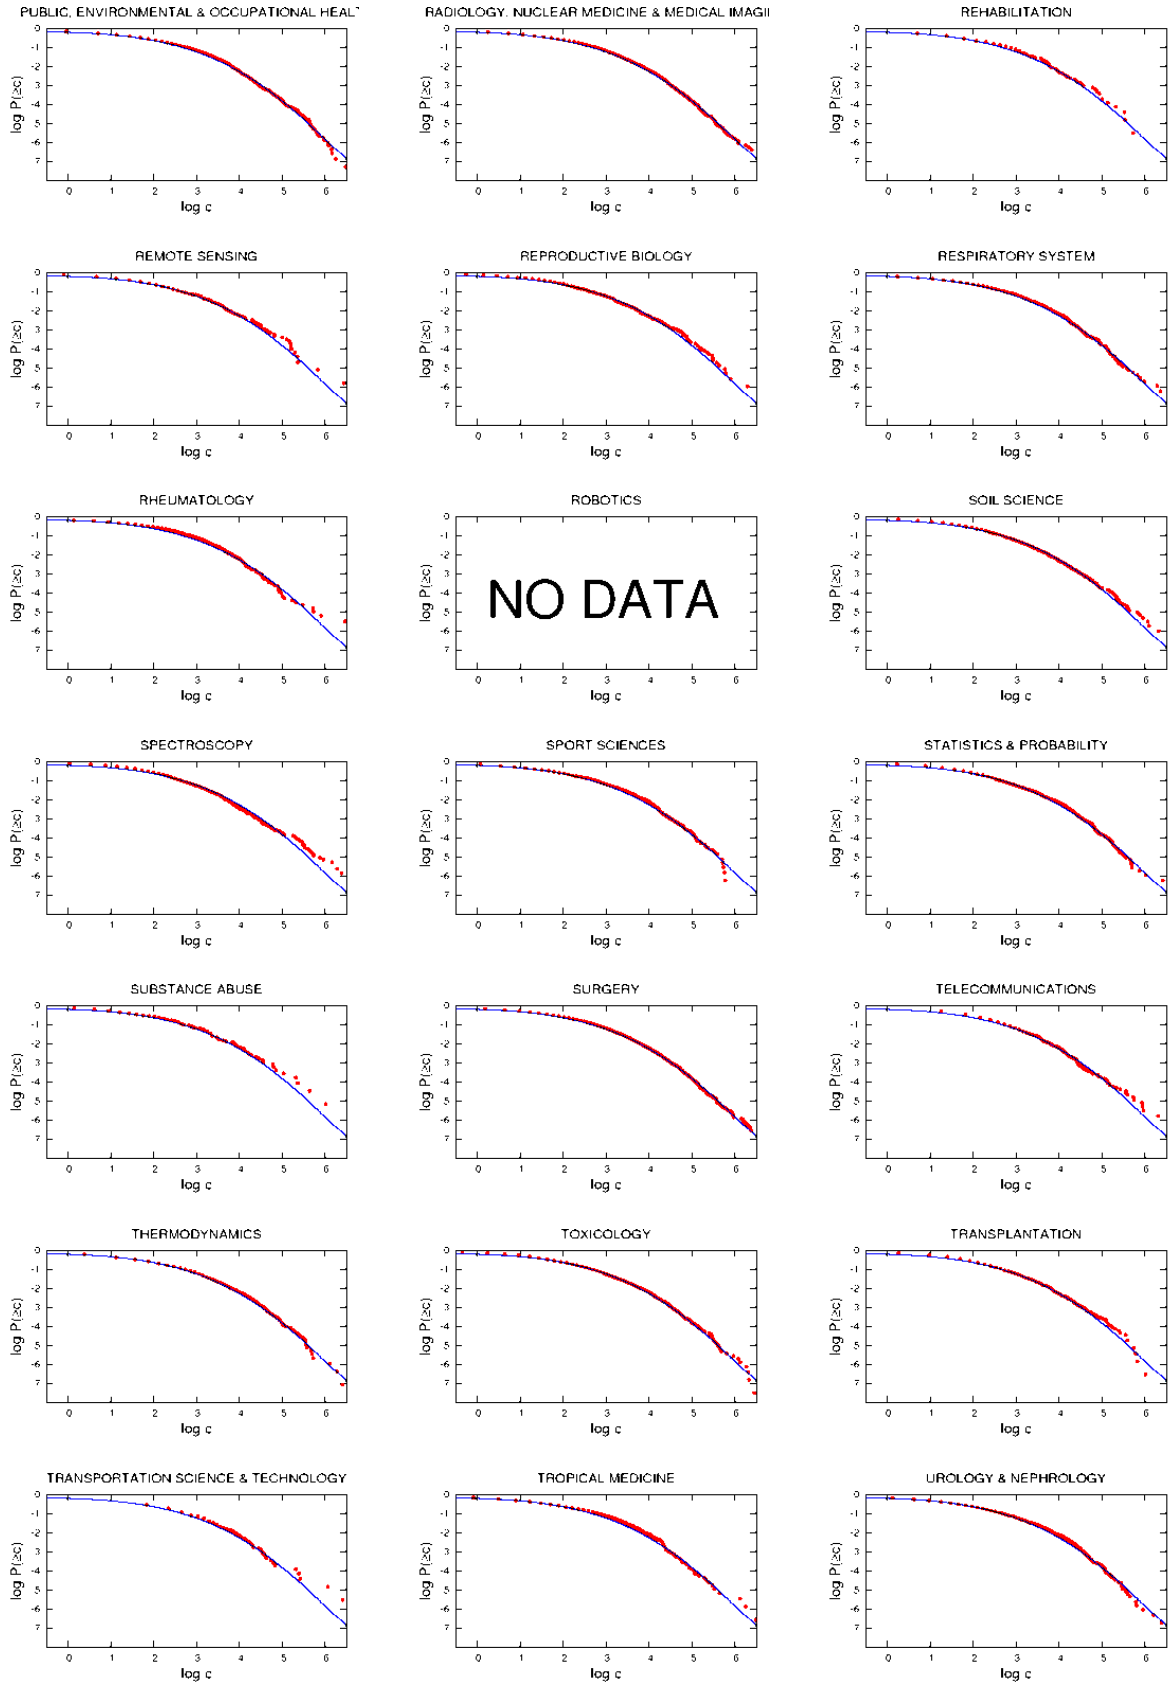

Figure S17: Publication year 1980.

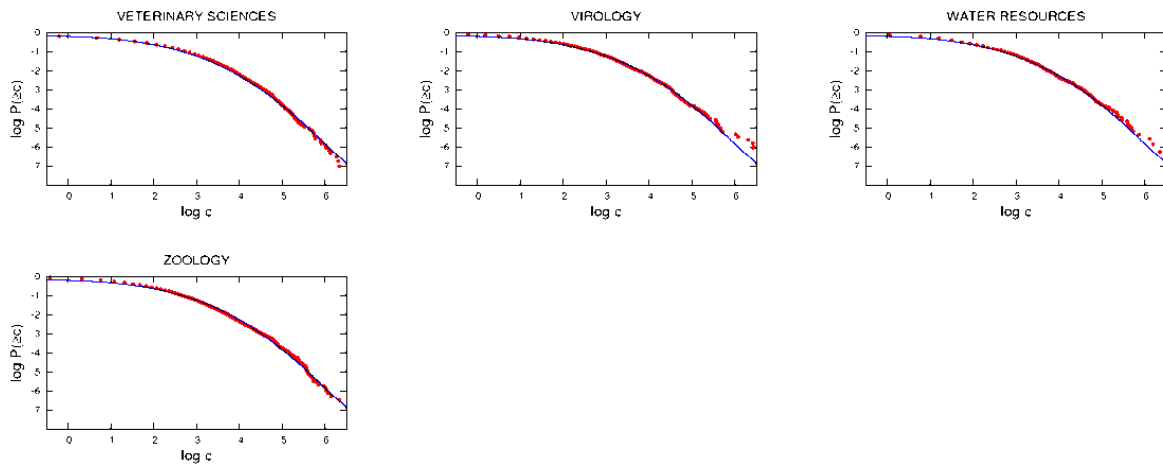

Figure S18: Publication year 1980.

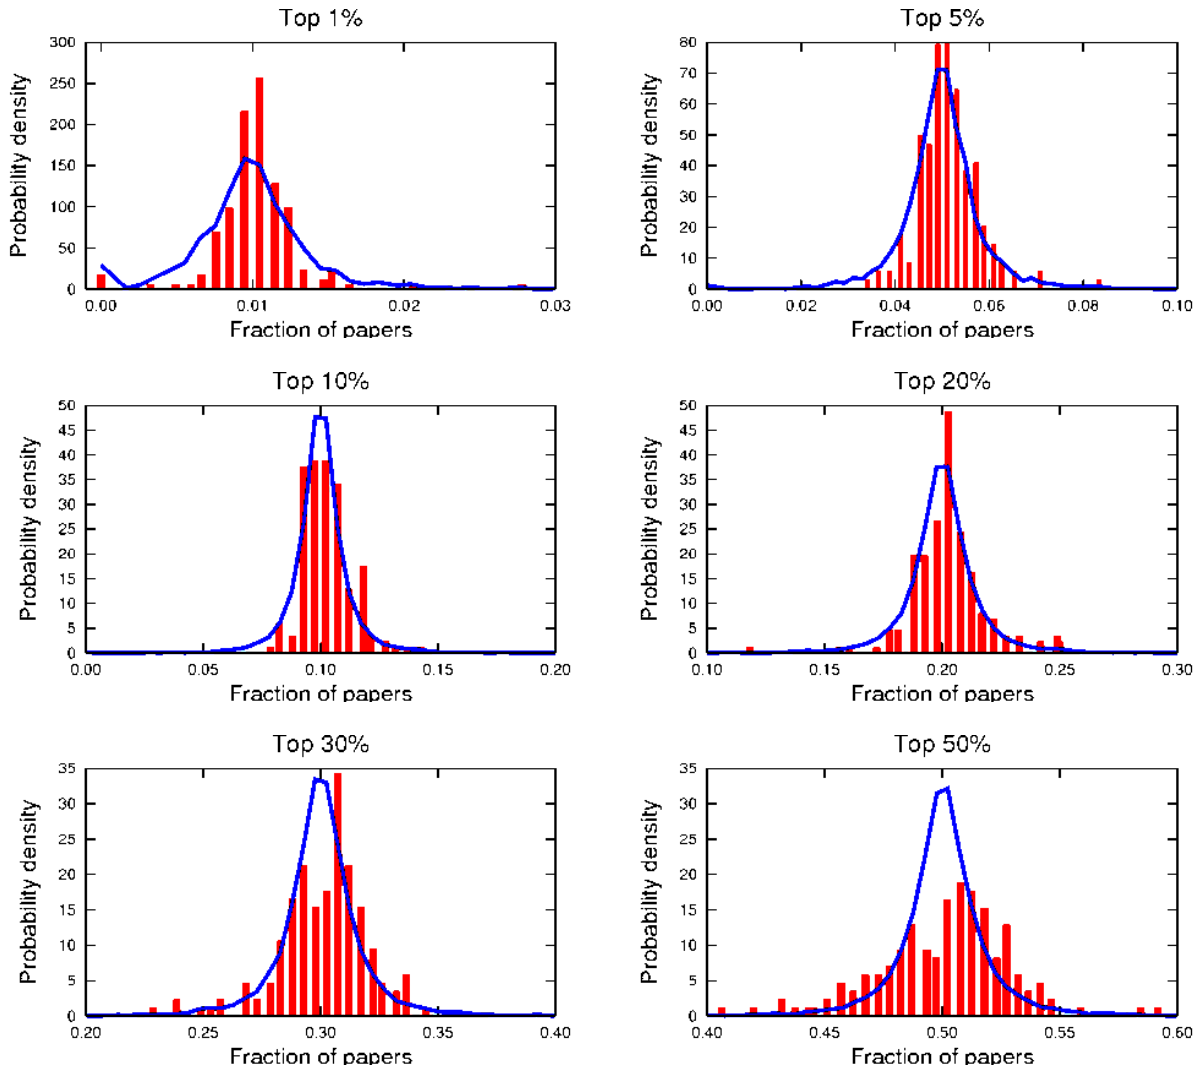

Figure S19: Publication year 1980.
