# Supplementary material for: A Reverse Engineering Approach to the Suppression of Citation Biases Reveals Universal Properties of Citation Distributions
Source: PubMed Central journal article supplement (PMC3315498; doi:10.1371/journal.pone.0033833), 2012-03-29
Supplement: pone.0033833.s003.pdf [file pone.0033833.s003.pdf]

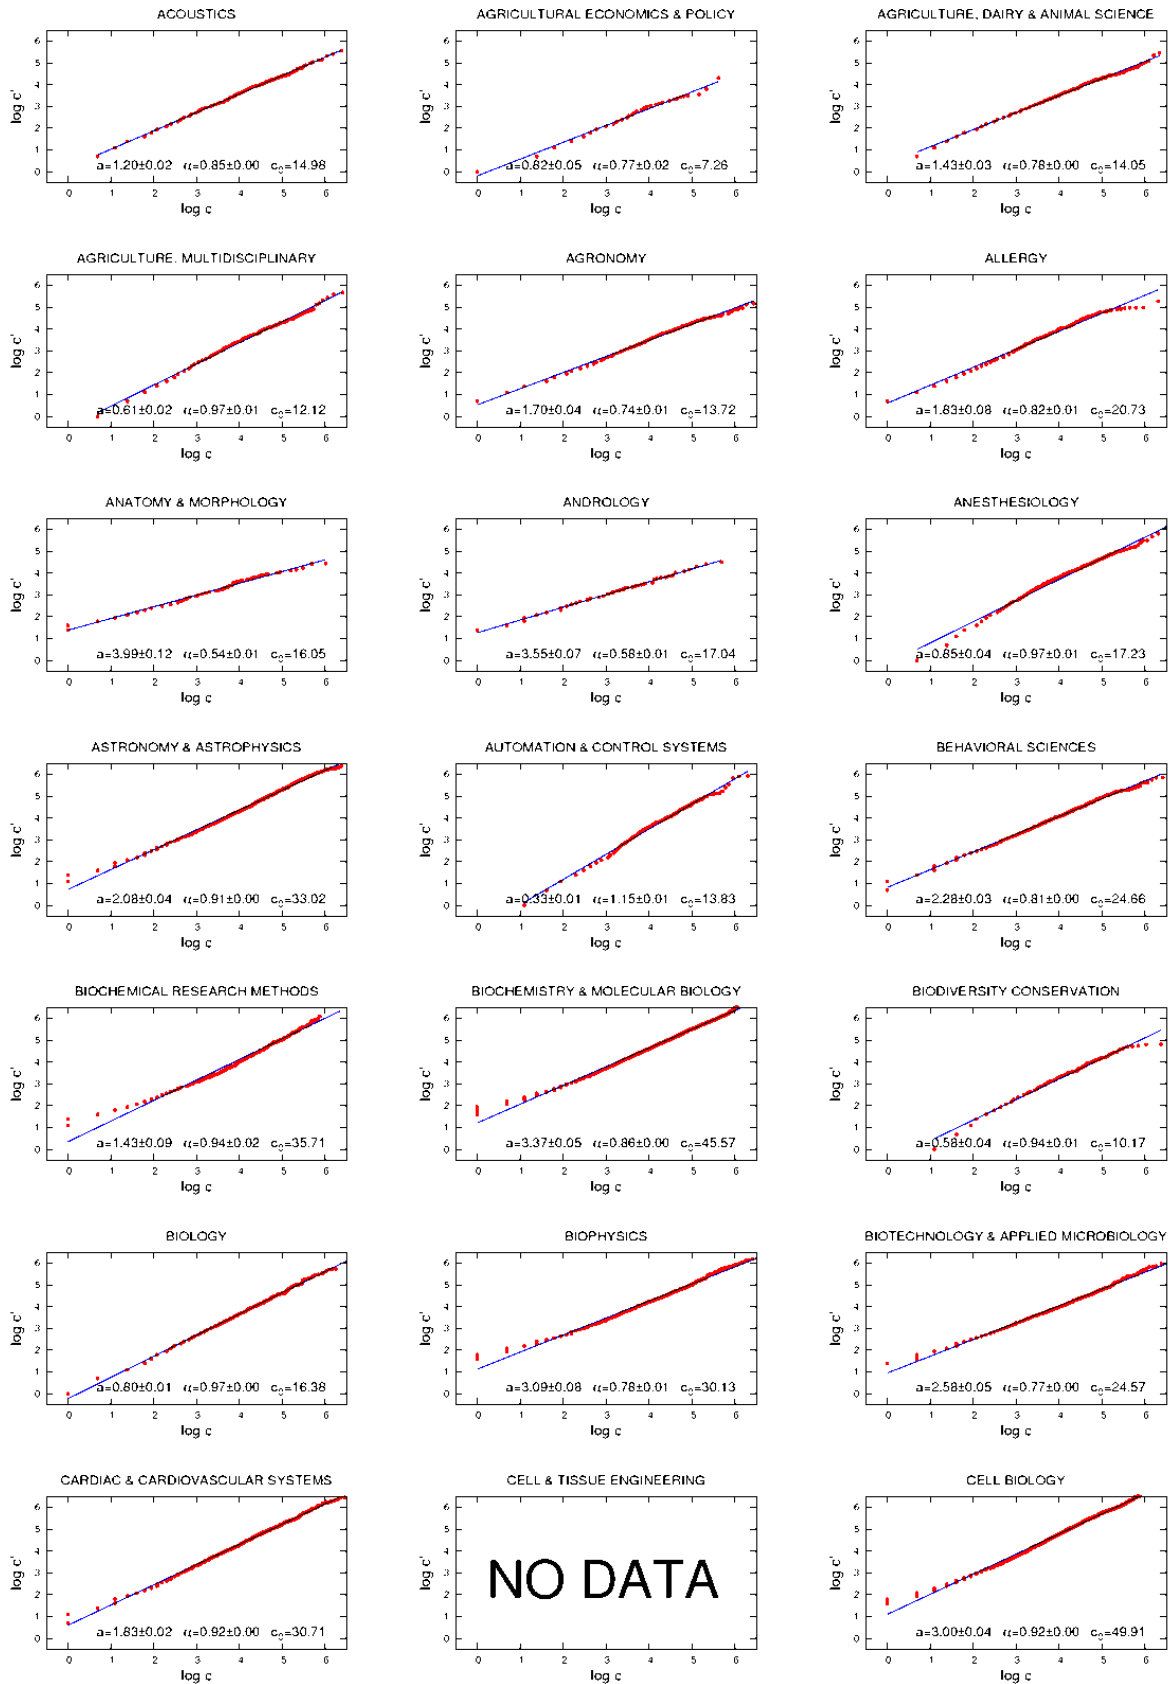

Figure S20: Publication year 1985.

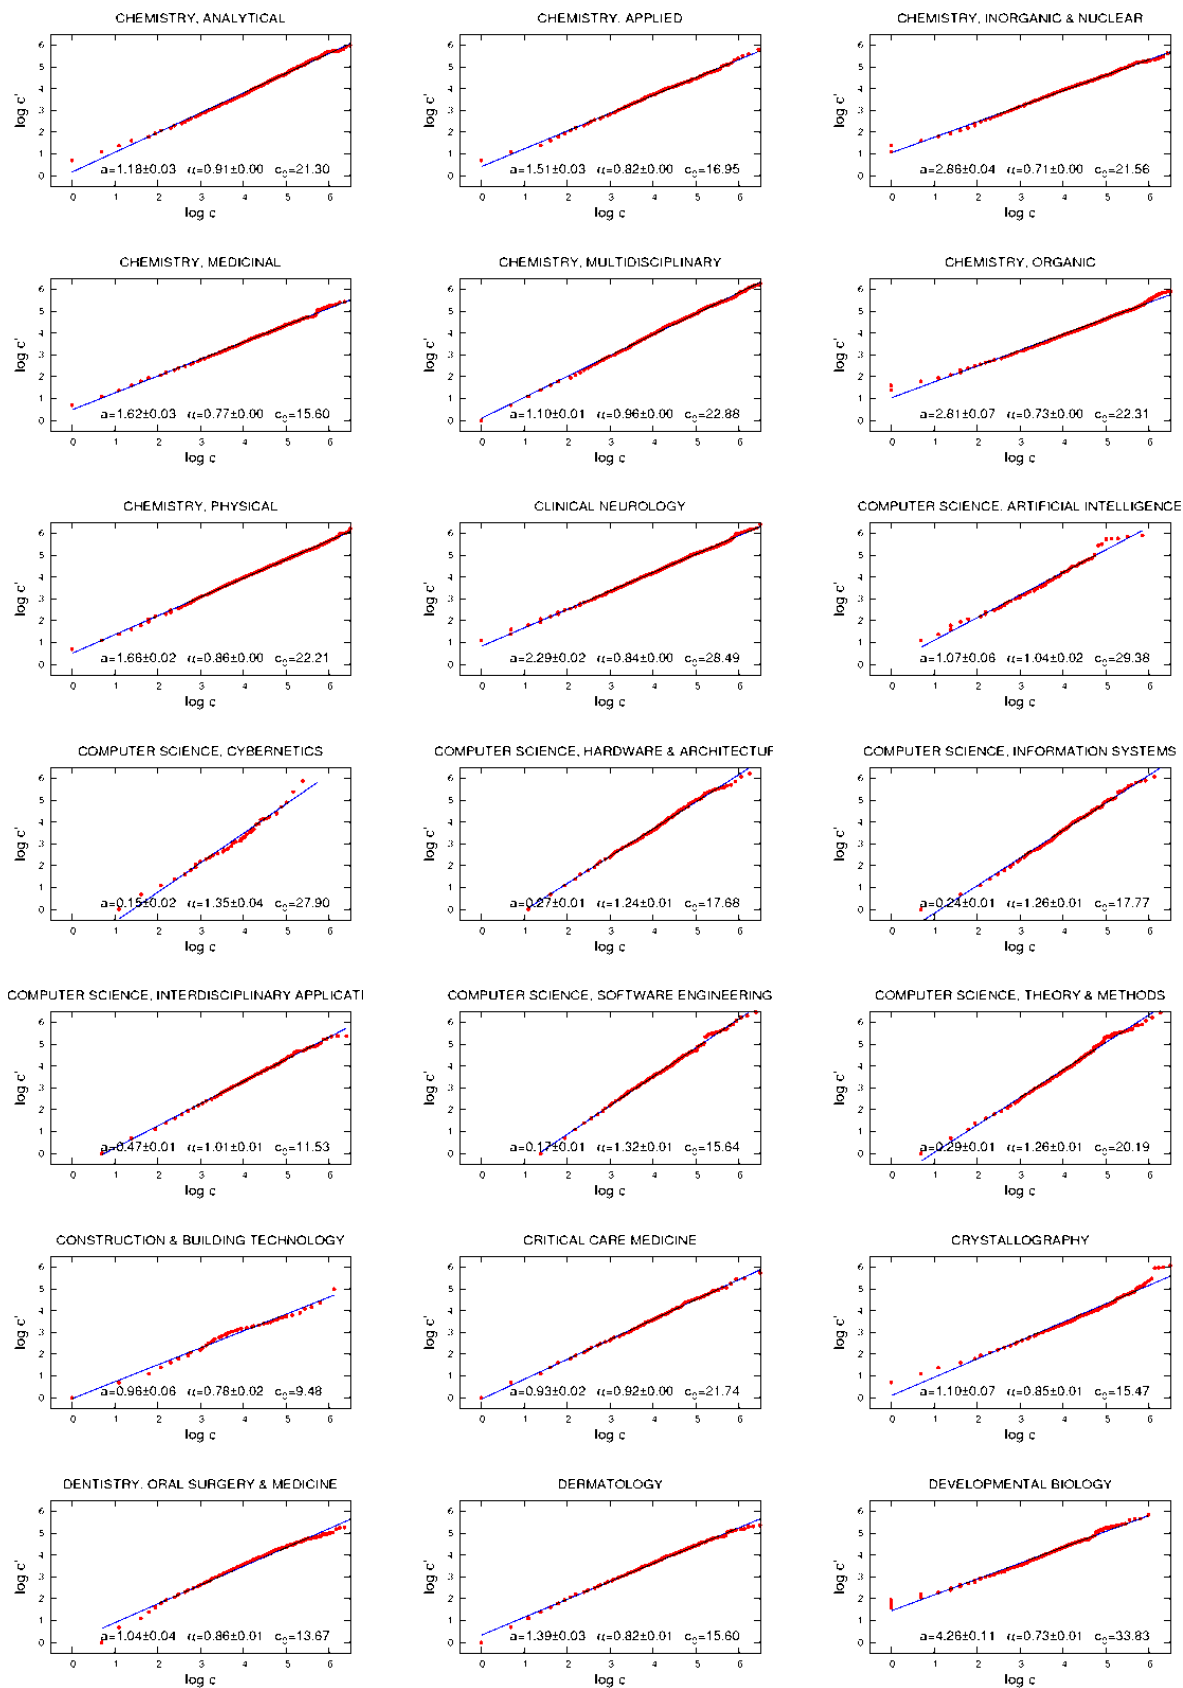

Figure S21: Publication year 1985.

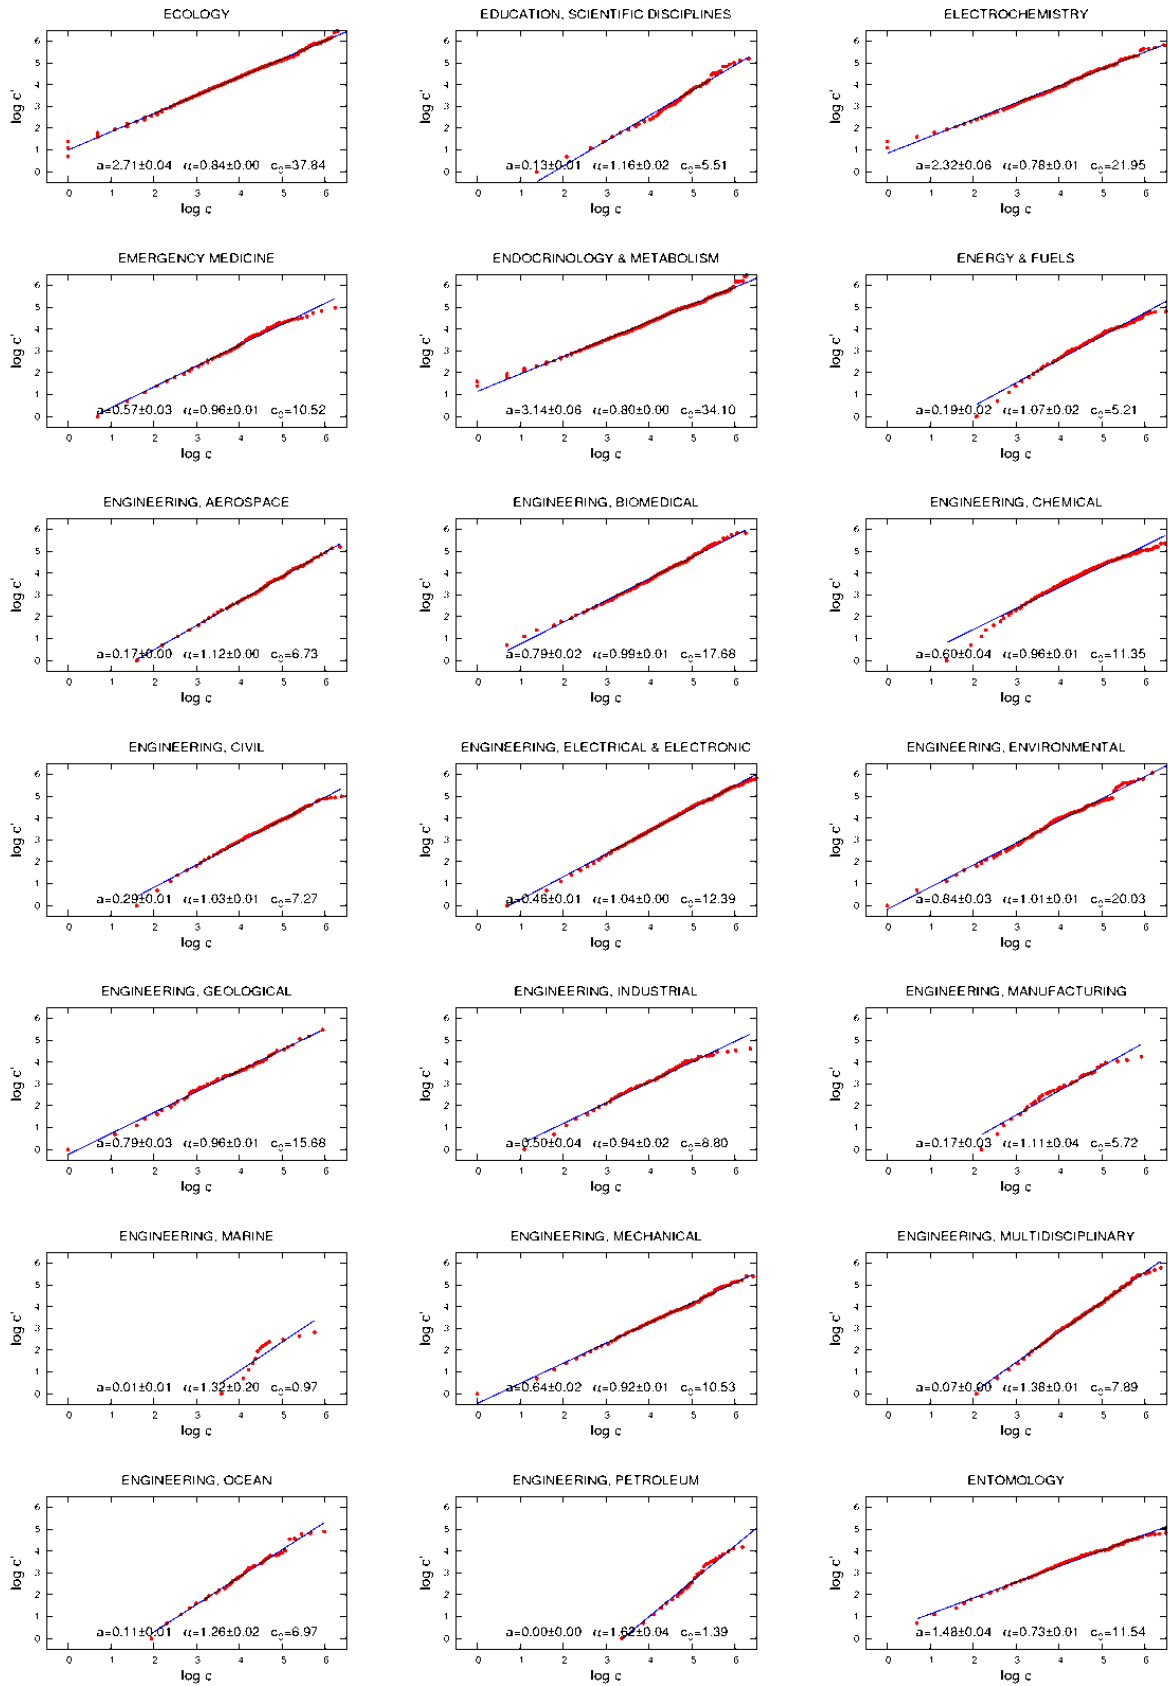

Figure S22: Publication year 1985.

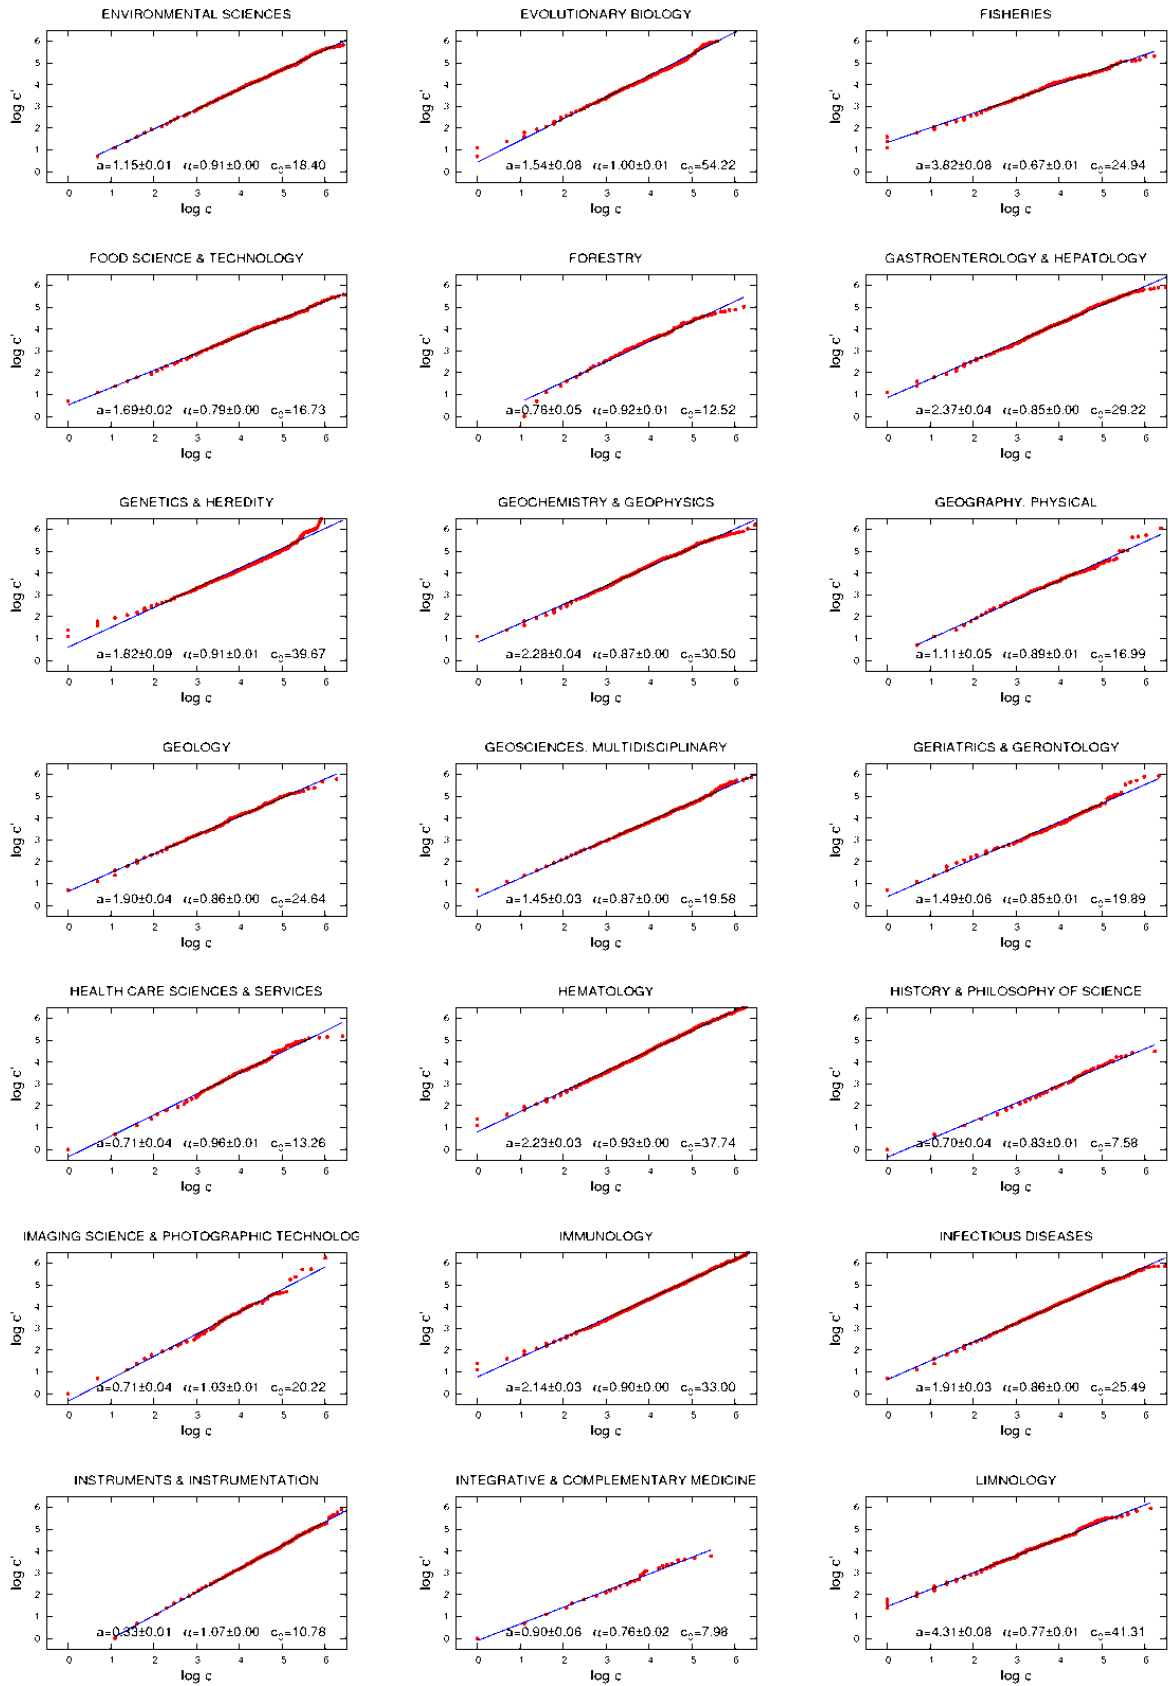

Figure S23: Publication year 1985.

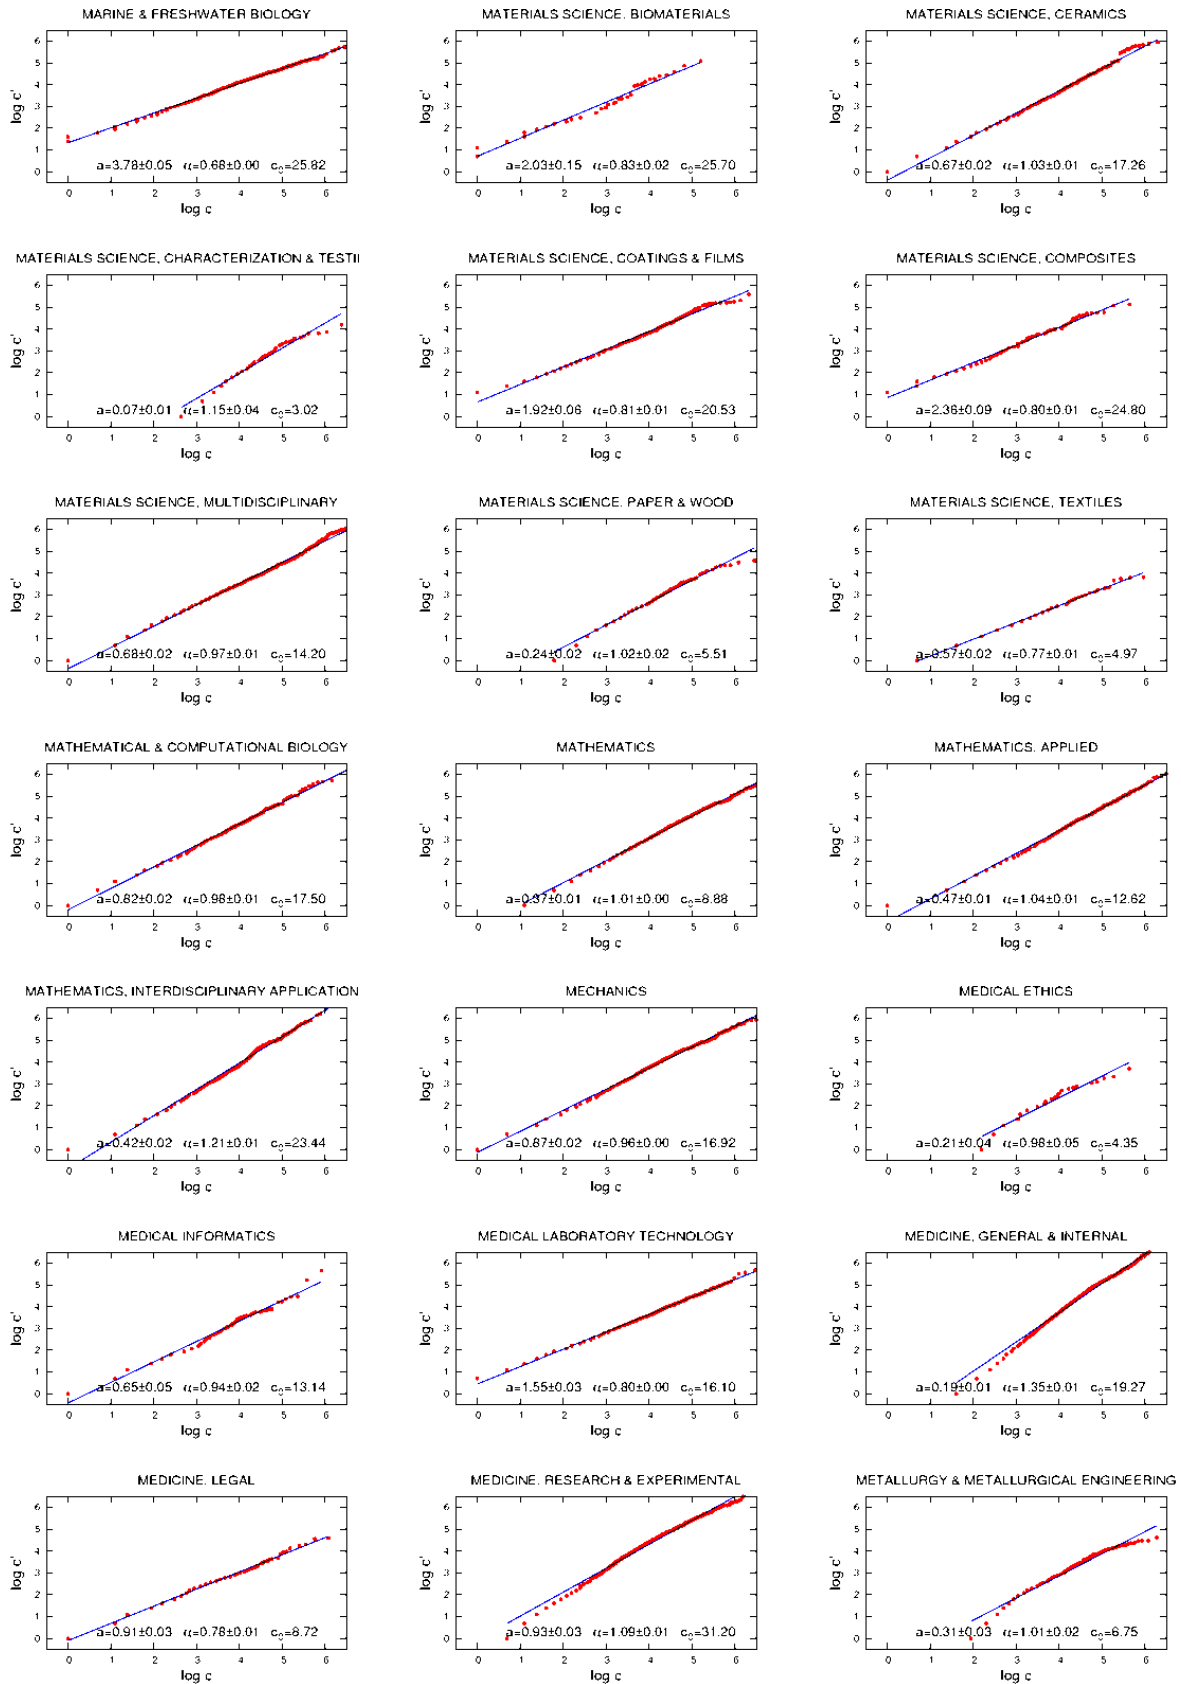

Figure S24: Publication year 1985.

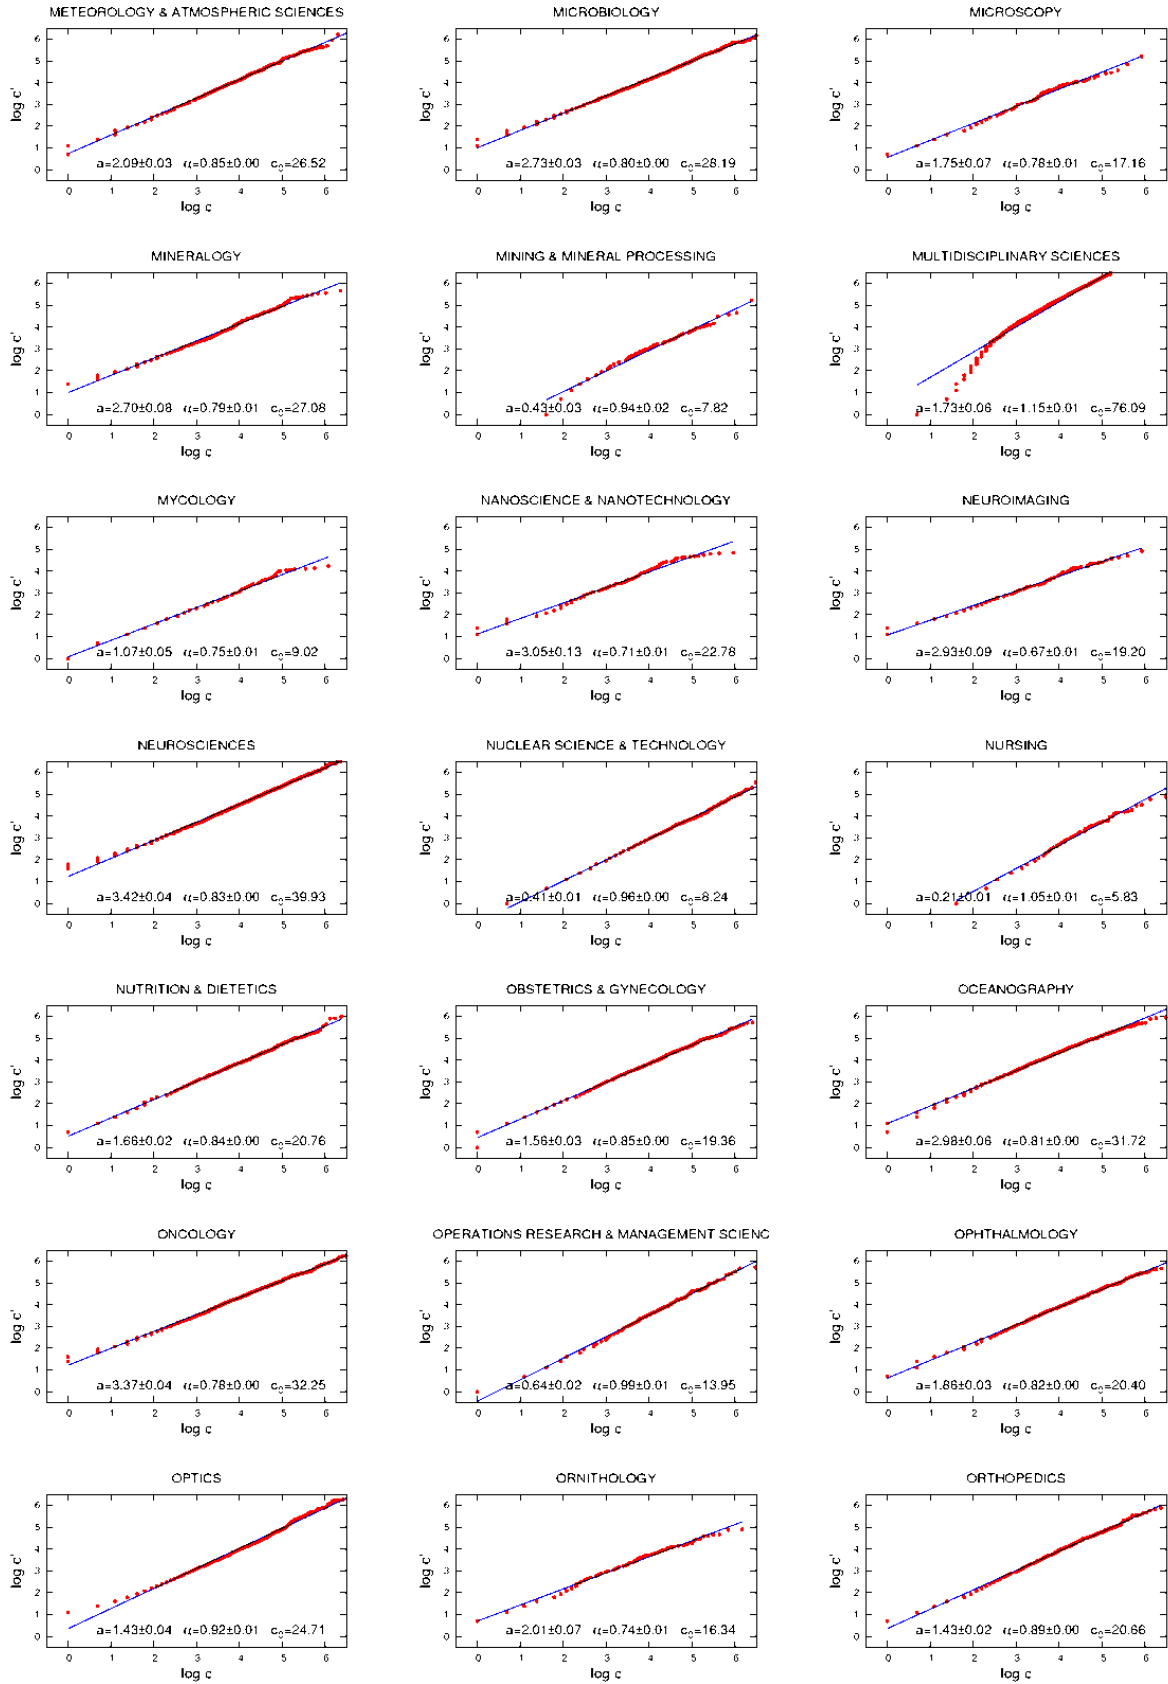

Figure S25: Publication year 1985.

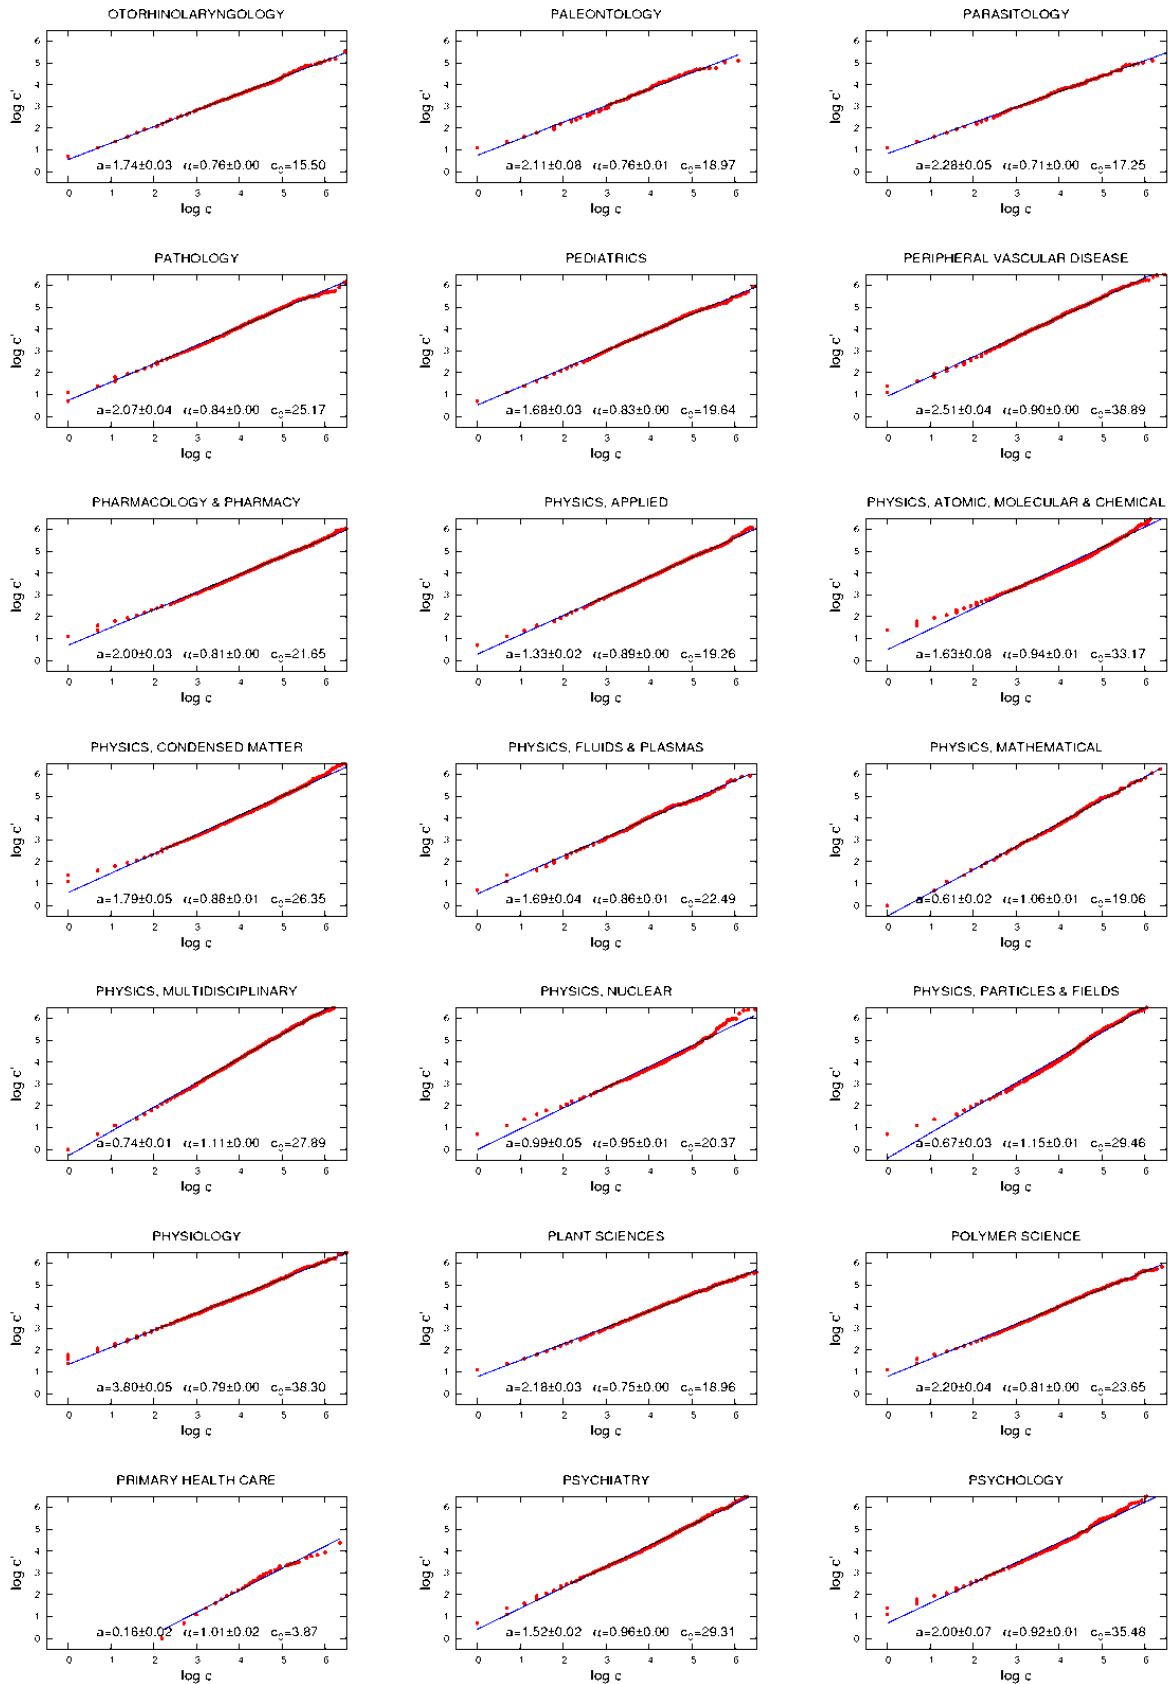

Figure S26: Publication year 1985.

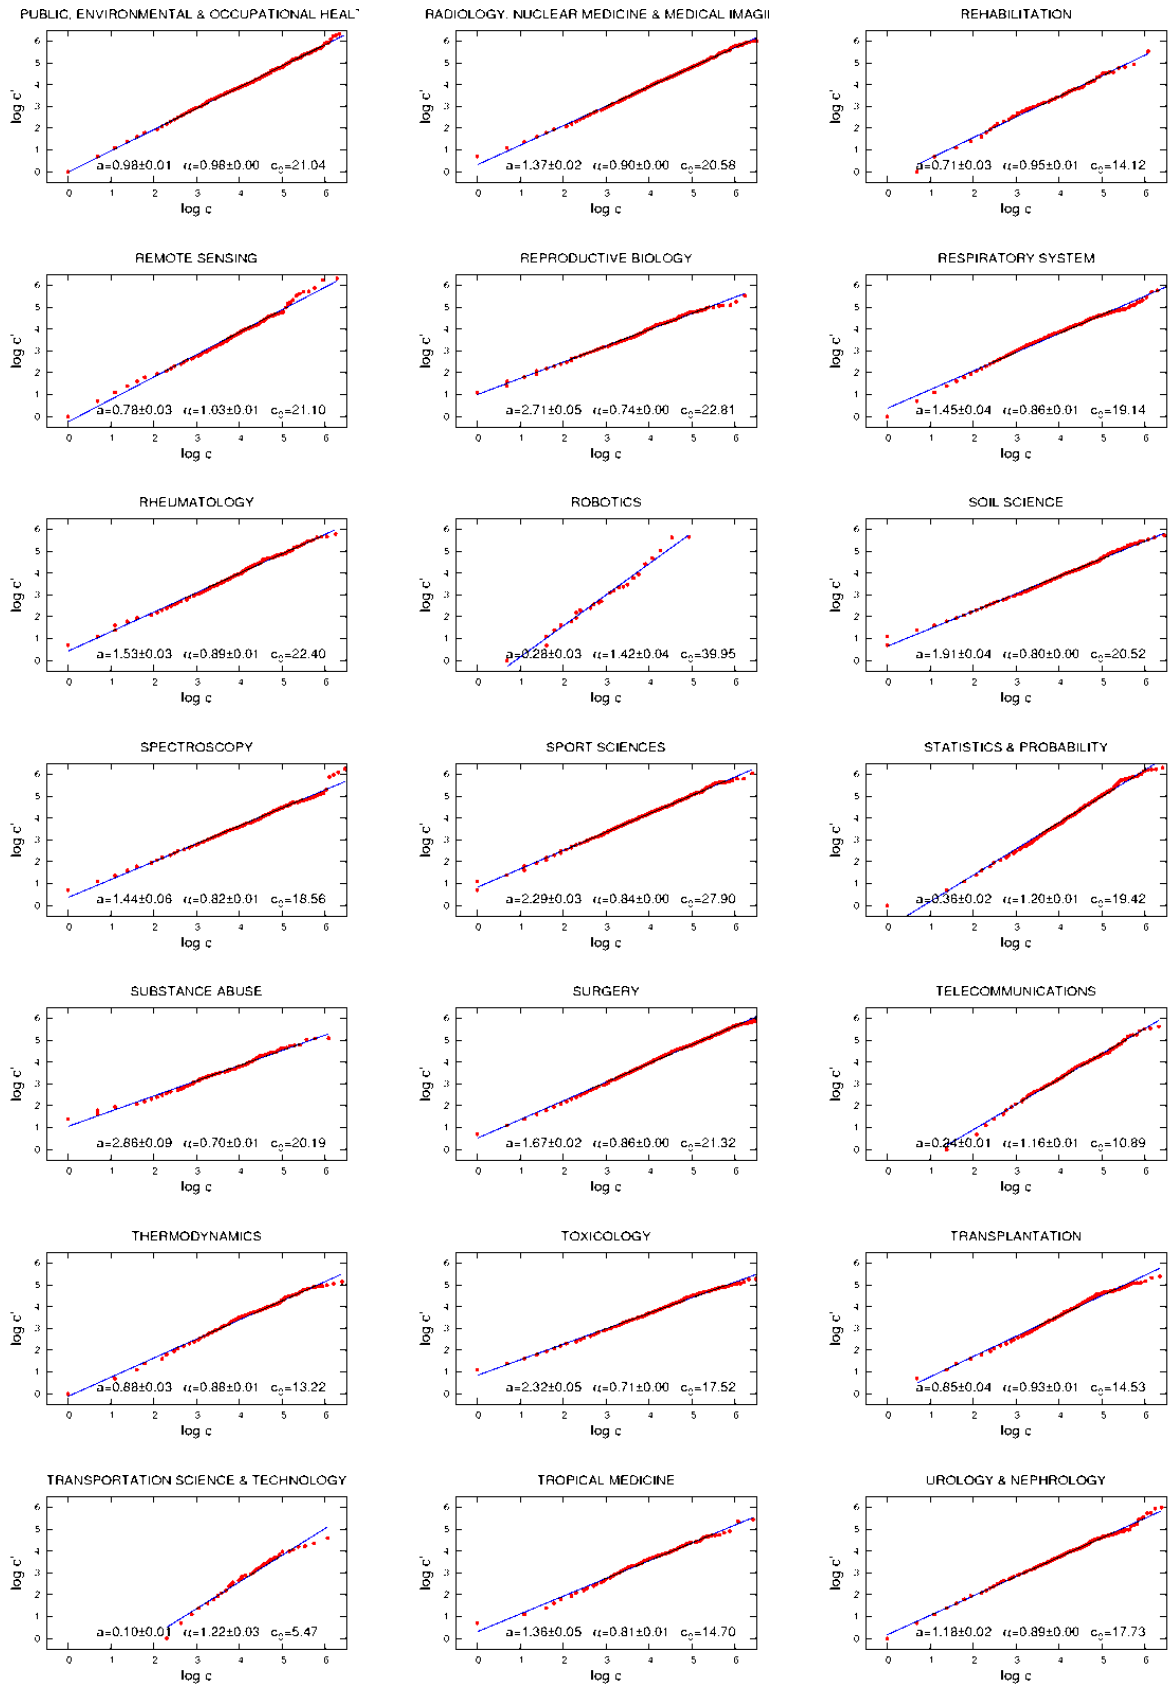

Figure S27: Publication year 1985.



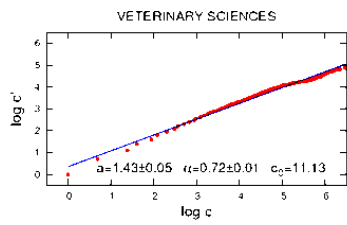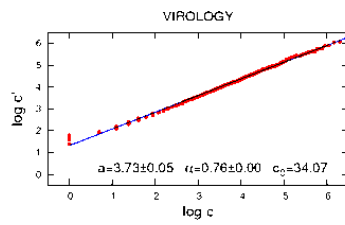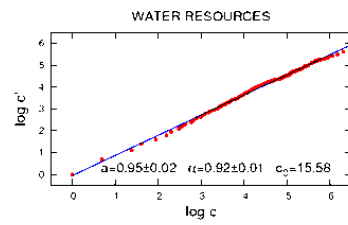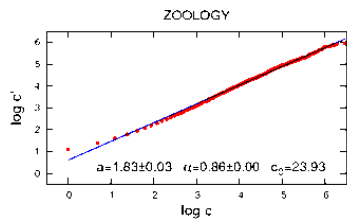

Figure S28: Publication year 1985.

| Subject-category                                 | $a$         | $\alpha$    | $\langle c \rangle$ | $N$    |
|--------------------------------------------------|-------------|-------------|---------------------|--------|
| ACOUSTICS                                        | 1.20 ± 0.02 | 0.85 ± 0.00 | 14.98               | 1,468  |
| AGRICULTURAL ECONOMICS & POLICY                  | 0.82 ± 0.05 | 0.77 ± 0.02 | 7.26                | 450    |
| AGRICULTURE, DAIRY & ANIMAL SCIENCE              | 1.43 ± 0.03 | 0.78 ± 0.00 | 14.05               | 2,034  |
| AGRICULTURE, MULTIDISCIPLINARY                   | 0.61 ± 0.02 | 0.97 ± 0.01 | 12.12               | 1,529  |
| AGRONOMY                                         | 1.70 ± 0.04 | 0.74 ± 0.01 | 13.72               | 2,384  |
| ALLERGY                                          | 1.83 ± 0.08 | 0.82 ± 0.01 | 20.73               | 636    |
| ANATOMY & MORPHOLOGY                             | 3.99 ± 0.12 | 0.54 ± 0.01 | 16.05               | 351    |
| ANDROLOGY                                        | 3.55 ± 0.07 | 0.58 ± 0.01 | 17.04               | 174    |
| ANESTHESIOLOGY                                   | 0.85 ± 0.04 | 0.97 ± 0.01 | 17.23               | 1,911  |
| ASTRONOMY & ASTROPHYSICS                         | 2.08 ± 0.04 | 0.91 ± 0.00 | 33.02               | 5,153  |
| AUTOMATION & CONTROL SYSTEMS                     | 0.33 ± 0.01 | 1.15 ± 0.01 | 13.83               | 1,257  |
| BEHAVIORAL SCIENCES                              | 2.28 ± 0.03 | 0.81 ± 0.00 | 24.66               | 2,331  |
| BIOCHEMICAL RESEARCH METHODS                     | 1.43 ± 0.09 | 0.94 ± 0.02 | 35.71               | 2,078  |
| BIOCHEMISTRY & MOLECULAR BIOLOGY                 | 3.37 ± 0.05 | 0.86 ± 0.00 | 45.57               | 18,570 |
| BIODIVERSITY CONSERVATION                        | 0.58 ± 0.04 | 0.94 ± 0.01 | 10.17               | 716    |
| BIOLOGY                                          | 0.80 ± 0.01 | 0.97 ± 0.00 | 16.38               | 2,868  |
| BIOPHYSICS                                       | 3.09 ± 0.08 | 0.78 ± 0.01 | 30.13               | 4,662  |
| BIOTECHNOLOGY & APPLIED MICROBIOLOGY             | 2.58 ± 0.05 | 0.77 ± 0.00 | 24.57               | 2,917  |
| CARDIAC & CARDIOVASCULAR SYSTEMS                 | 1.83 ± 0.02 | 0.92 ± 0.00 | 30.71               | 4,995  |
| CELL & TISSUE ENGINEERING                        | —           | —           | —                   | 0      |
| CELL BIOLOGY                                     | 3.00 ± 0.04 | 0.92 ± 0.00 | 49.91               | 7,420  |
| CHEMISTRY, ANALYTICAL                            | 1.18 ± 0.03 | 0.91 ± 0.00 | 21.30               | 5,321  |
| CHEMISTRY, APPLIED                               | 1.51 ± 0.03 | 0.82 ± 0.00 | 16.95               | 1,628  |
| CHEMISTRY, INORGANIC & NUCLEAR                   | 2.86 ± 0.04 | 0.71 ± 0.00 | 21.56               | 3,977  |
| CHEMISTRY, MEDICINAL                             | 1.62 ± 0.03 | 0.77 ± 0.00 | 15.60               | 2,840  |
| CHEMISTRY, MULTIDISCIPLINARY                     | 1.10 ± 0.01 | 0.96 ± 0.00 | 22.88               | 9,962  |
| CHEMISTRY, ORGANIC                               | 2.81 ± 0.07 | 0.73 ± 0.00 | 22.31               | 7,231  |
| CHEMISTRY, PHYSICAL                              | 1.66 ± 0.02 | 0.86 ± 0.00 | 22.21               | 8,988  |
| CLINICAL NEUROLOGY                               | 2.29 ± 0.02 | 0.84 ± 0.00 | 28.49               | 5,375  |
| COMPUTER SCIENCE, ARTIFICIAL INTELLIGENCE        | 1.07 ± 0.06 | 1.04 ± 0.02 | 29.38               | 243    |
| COMPUTER SCIENCE, CYBERNETICS                    | 0.15 ± 0.02 | 1.35 ± 0.04 | 27.90               | 195    |
| COMPUTER SCIENCE, HARDWARE & ARCHITECTURE        | 0.27 ± 0.01 | 1.24 ± 0.01 | 17.68               | 1,134  |
| COMPUTER SCIENCE, INFORMATION SYSTEMS            | 0.24 ± 0.01 | 1.26 ± 0.01 | 17.77               | 876    |
| COMPUTER SCIENCE, INTERDISCIPLINARY APPLICATIONS | 0.47 ± 0.01 | 1.01 ± 0.01 | 11.53               | 1,529  |
| COMPUTER SCIENCE, SOFTWARE ENGINEERING           | 0.17 ± 0.01 | 1.32 ± 0.01 | 15.64               | 1,502  |
| COMPUTER SCIENCE, THEORY & METHODS               | 0.29 ± 0.01 | 1.26 ± 0.01 | 20.19               | 1,180  |
| CONSTRUCTION & BUILDING TECHNOLOGY               | 0.96 ± 0.06 | 0.78 ± 0.02 | 9.48                | 433    |
| CRITICAL CARE MEDICINE                           | 0.93 ± 0.02 | 0.92 ± 0.00 | 21.74               | 891    |
| CRYSTALLOGRAPHY                                  | 1.10 ± 0.07 | 0.85 ± 0.01 | 15.47               | 2,672  |
| DENTISTRY, ORAL SURGERY & MEDICINE               | 1.04 ± 0.04 | 0.86 ± 0.01 | 13.67               | 2,833  |
| DERMATOLOGY                                      | 1.39 ± 0.03 | 0.82 ± 0.01 | 15.60               | 2,651  |
| DEVELOPMENTAL BIOLOGY                            | 4.25 ± 0.11 | 0.73 ± 0.01 | 33.83               | 665    |
| ECOLOGY                                          | 2.71 ± 0.04 | 0.84 ± 0.00 | 37.84               | 3,726  |
| EDUCATION, SCIENTIFIC DISCIPLINES                | 0.13 ± 0.01 | 1.16 ± 0.02 | 5.51                | 1,310  |
| ELECTROCHEMISTRY                                 | 2.32 ± 0.06 | 0.78 ± 0.01 | 21.95               | 1,616  |
| EMERGENCY MEDICINE                               | 0.57 ± 0.03 | 0.96 ± 0.01 | 10.52               | 560    |
| ENDOCRINOLOGY & METABOLISM                       | 3.14 ± 0.06 | 0.80 ± 0.00 | 34.10               | 4,871  |
| ENERGY & FUELS                                   | 0.19 ± 0.02 | 1.07 ± 0.02 | 5.21                | 2,698  |
| ENGINEERING, AEROSPACE                           | 0.17 ± 0.00 | 1.12 ± 0.00 | 6.73                | 1,395  |
| ENGINEERING, BIOMEDICAL                          | 0.79 ± 0.02 | 0.99 ± 0.01 | 17.68               | 1,128  |

Table S17: Publication year 1985.

| Subject-category                              | $a$         | $\alpha$    | $\langle c \rangle$ | $N$   |
|-----------------------------------------------|-------------|-------------|---------------------|-------|
| ENGINEERING, CHEMICAL                         | 0.60 ± 0.04 | 0.96 ± 0.01 | 11.35               | 5,088 |
| ENGINEERING, CIVIL                            | 0.29 ± 0.01 | 1.03 ± 0.01 | 7.27                | 2,239 |
| ENGINEERING, ELECTRICAL & ELECTRONIC          | 0.46 ± 0.01 | 1.04 ± 0.00 | 12.39               | 9,114 |
| ENGINEERING, ENVIRONMENTAL                    | 0.84 ± 0.03 | 1.01 ± 0.01 | 20.03               | 964   |
| ENGINEERING, GEOLOGICAL                       | 0.79 ± 0.03 | 0.96 ± 0.01 | 15.68               | 307   |
| ENGINEERING, INDUSTRIAL                       | 0.50 ± 0.04 | 0.94 ± 0.02 | 8.80                | 705   |
| ENGINEERING, MANUFACTURING                    | 0.17 ± 0.03 | 1.11 ± 0.04 | 5.72                | 282   |
| ENGINEERING, MARINE                           | 0.01 ± 0.01 | 1.32 ± 0.20 | 0.97                | 200   |
| ENGINEERING, MECHANICAL                       | 0.64 ± 0.02 | 0.92 ± 0.01 | 10.53               | 2,334 |
| ENGINEERING, MULTIDISCIPLINARY                | 0.07 ± 0.00 | 1.38 ± 0.01 | 7.89                | 2,129 |
| ENGINEERING, OCEAN                            | 0.11 ± 0.01 | 1.26 ± 0.02 | 6.97                | 329   |
| ENGINEERING, PETROLEUM                        | 0.00 ± 0.00 | 1.62 ± 0.04 | 1.39                | 961   |
| ENTOMOLOGY                                    | 1.48 ± 0.04 | 0.73 ± 0.01 | 11.54               | 2,664 |
| ENVIRONMENTAL SCIENCES                        | 1.15 ± 0.01 | 0.91 ± 0.00 | 18.40               | 4,750 |
| EVOLUTIONARY BIOLOGY                          | 1.54 ± 0.08 | 1.00 ± 0.01 | 54.22               | 1,138 |
| FISHERIES                                     | 3.82 ± 0.08 | 0.67 ± 0.01 | 24.94               | 1,058 |
| FOOD SCIENCE & TECHNOLOGY                     | 1.69 ± 0.02 | 0.79 ± 0.00 | 16.73               | 3,196 |
| FORESTRY                                      | 0.76 ± 0.05 | 0.92 ± 0.01 | 12.52               | 1,030 |
| GASTROENTEROLOGY & HEPATOLOGY                 | 2.37 ± 0.04 | 0.85 ± 0.00 | 29.22               | 2,602 |
| GENETICS & HEREDITY                           | 1.82 ± 0.09 | 0.91 ± 0.01 | 39.67               | 3,136 |
| GEOCHEMISTRY & GEOPHYSICS                     | 2.28 ± 0.04 | 0.87 ± 0.00 | 30.50               | 2,507 |
| GEOGRAPHY, PHYSICAL                           | 1.11 ± 0.05 | 0.89 ± 0.01 | 16.99               | 718   |
| GEOLOGY                                       | 1.90 ± 0.04 | 0.86 ± 0.00 | 24.64               | 595   |
| GEOSCIENCES, MULTIDISCIPLINARY                | 1.45 ± 0.03 | 0.87 ± 0.00 | 19.58               | 2,968 |
| GERIATRICS & GERONTOLOGY                      | 1.49 ± 0.06 | 0.85 ± 0.01 | 19.89               | 663   |
| HEALTH CARE SCIENCES & SERVICES               | 0.71 ± 0.04 | 0.96 ± 0.01 | 13.26               | 762   |
| HEMATOLOGY                                    | 2.23 ± 0.03 | 0.93 ± 0.00 | 37.74               | 3,406 |
| HISTORY & PHILOSOPHY OF SCIENCE               | 0.70 ± 0.04 | 0.83 ± 0.01 | 7.58                | 540   |
| IMAGING SCIENCE & PHOTOGRAPHIC TECHNOLOGY     | 0.71 ± 0.04 | 1.03 ± 0.01 | 20.22               | 342   |
| IMMUNOLOGY                                    | 2.14 ± 0.03 | 0.90 ± 0.00 | 33.00               | 8,667 |
| INFECTIOUS DISEASES                           | 1.91 ± 0.03 | 0.86 ± 0.00 | 25.49               | 2,547 |
| INSTRUMENTS & INSTRUMENTATION                 | 0.33 ± 0.01 | 1.07 ± 0.00 | 10.78               | 3,692 |
| INTEGRATIVE & COMPLEMENTARY MEDICINE          | 0.90 ± 0.06 | 0.76 ± 0.02 | 7.98                | 108   |
| LIMNOLOGY                                     | 4.31 ± 0.08 | 0.77 ± 0.01 | 41.31               | 444   |
| MARINE & FRESHWATER BIOLOGY                   | 3.78 ± 0.05 | 0.68 ± 0.00 | 25.82               | 3,267 |
| MATERIALS SCIENCE, BIOMATERIALS               | 2.03 ± 0.15 | 0.83 ± 0.02 | 25.70               | 70    |
| MATERIALS SCIENCE, CERAMICS                   | 0.67 ± 0.02 | 1.03 ± 0.01 | 17.26               | 1,250 |
| MATERIALS SCIENCE, CHARACTERIZATION & TESTING | 0.07 ± 0.01 | 1.15 ± 0.04 | 3.02                | 737   |
| MATERIALS SCIENCE, COATINGS & FILMS           | 1.92 ± 0.06 | 0.81 ± 0.01 | 20.53               | 1,315 |
| MATERIALS SCIENCE, COMPOSITES                 | 2.36 ± 0.09 | 0.80 ± 0.01 | 24.80               | 158   |
| MATERIALS SCIENCE, MULTIDISCIPLINARY          | 0.68 ± 0.02 | 0.97 ± 0.01 | 14.20               | 5,919 |
| MATERIALS SCIENCE, PAPER & WOOD               | 0.24 ± 0.02 | 1.02 ± 0.02 | 5.51                | 817   |
| MATERIALS SCIENCE, TEXTILES                   | 0.57 ± 0.02 | 0.77 ± 0.01 | 4.97                | 322   |
| MATHEMATICAL & COMPUTATIONAL BIOLOGY          | 0.82 ± 0.02 | 0.98 ± 0.01 | 17.50               | 931   |
| MATHEMATICS                                   | 0.37 ± 0.01 | 1.01 ± 0.00 | 8.88                | 7,895 |
| MATHEMATICS, APPLIED                          | 0.47 ± 0.01 | 1.04 ± 0.01 | 12.62               | 3,619 |
| MATHEMATICS, INTERDISCIPLINARY APPLICATIONS   | 0.42 ± 0.02 | 1.21 ± 0.01 | 23.44               | 1,332 |
| MECHANICS                                     | 0.87 ± 0.02 | 0.96 ± 0.00 | 16.92               | 3,640 |
| MEDICAL ETHICS                                | 0.21 ± 0.04 | 0.98 ± 0.05 | 4.35                | 158   |
| MEDICAL INFORMATICS                           | 0.65 ± 0.05 | 0.94 ± 0.02 | 13.14               | 283   |

Table S18: Publication year 1985.

| Subject-category                              | $a$         | $\alpha$    | $\langle c \rangle$ | $N$    |
|-----------------------------------------------|-------------|-------------|---------------------|--------|
| MEDICAL LABORATORY TECHNOLOGY                 | 1.55 ± 0.03 | 0.80 ± 0.00 | 16.10               | 1,657  |
| MEDICINE, GENERAL & INTERNAL                  | 0.19 ± 0.01 | 1.35 ± 0.01 | 19.27               | 15,623 |
| MEDICINE, LEGAL                               | 0.91 ± 0.03 | 0.78 ± 0.01 | 8.72                | 403    |
| MEDICINE, RESEARCH & EXPERIMENTAL             | 0.93 ± 0.03 | 1.09 ± 0.01 | 31.20               | 4,958  |
| METALLURGY & METALLURGICAL ENGINEERING        | 0.31 ± 0.03 | 1.01 ± 0.02 | 6.75                | 1,198  |
| METEOROLOGY & ATMOSPHERIC SCIENCES            | 2.09 ± 0.03 | 0.85 ± 0.00 | 26.52               | 1,880  |
| MICROBIOLOGY                                  | 2.73 ± 0.03 | 0.80 ± 0.00 | 28.19               | 5,452  |
| MICROSCOPY                                    | 1.75 ± 0.07 | 0.78 ± 0.01 | 17.16               | 286    |
| MINERALOGY                                    | 2.70 ± 0.08 | 0.79 ± 0.01 | 27.08               | 708    |
| MINING & MINERAL PROCESSING                   | 0.43 ± 0.03 | 0.94 ± 0.02 | 7.82                | 740    |
| MULTIDISCIPLINARY SCIENCES                    | 1.73 ± 0.06 | 1.15 ± 0.01 | 76.09               | 7,785  |
| MYCOLOGY                                      | 1.07 ± 0.05 | 0.75 ± 0.01 | 9.02                | 401    |
| NANOSCIENCE & NANOTECHNOLOGY                  | 3.05 ± 0.13 | 0.71 ± 0.01 | 22.78               | 316    |
| NEUROIMAGING                                  | 2.93 ± 0.09 | 0.67 ± 0.01 | 19.20               | 292    |
| NEUROSCIENCES                                 | 3.42 ± 0.04 | 0.83 ± 0.00 | 39.93               | 10,403 |
| NUCLEAR SCIENCE & TECHNOLOGY                  | 0.41 ± 0.01 | 0.96 ± 0.00 | 8.24                | 5,203  |
| NURSING                                       | 0.21 ± 0.01 | 1.05 ± 0.01 | 5.83                | 877    |
| NUTRITION & DIETETICS                         | 1.66 ± 0.02 | 0.84 ± 0.00 | 20.76               | 2,159  |
| OBSTETRICS & GYNECOLOGY                       | 1.56 ± 0.03 | 0.85 ± 0.00 | 19.36               | 3,074  |
| OCEANOGRAPHY                                  | 2.98 ± 0.06 | 0.81 ± 0.00 | 31.72               | 1,746  |
| ONCOLOGY                                      | 3.37 ± 0.04 | 0.78 ± 0.00 | 32.25               | 6,156  |
| OPERATIONS RESEARCH & MANAGEMENT SCIENCE      | 0.64 ± 0.02 | 0.99 ± 0.01 | 13.95               | 1,712  |
| OPHTHALMOLOGY                                 | 1.86 ± 0.03 | 0.82 ± 0.00 | 20.40               | 2,914  |
| OPTICS                                        | 1.43 ± 0.04 | 0.92 ± 0.01 | 24.71               | 4,696  |
| ORNITHOLOGY                                   | 2.01 ± 0.07 | 0.74 ± 0.01 | 16.34               | 475    |
| ORTHOPEDICS                                   | 1.43 ± 0.02 | 0.89 ± 0.00 | 20.66               | 2,167  |
| OTORHINOLARYNGOLOGY                           | 1.74 ± 0.03 | 0.76 ± 0.00 | 15.50               | 1,689  |
| PALEONTOLOGY                                  | 2.11 ± 0.08 | 0.76 ± 0.01 | 18.97               | 406    |
| PARASITOLOGY                                  | 2.28 ± 0.05 | 0.71 ± 0.00 | 17.25               | 958    |
| PATHOLOGY                                     | 2.07 ± 0.04 | 0.84 ± 0.00 | 25.17               | 3,345  |
| PEDIATRICS                                    | 1.68 ± 0.03 | 0.83 ± 0.00 | 19.64               | 3,886  |
| PERIPHERAL VASCULAR DISEASE                   | 2.51 ± 0.04 | 0.90 ± 0.00 | 38.89               | 2,446  |
| PHARMACOLOGY & PHARMACY                       | 2.00 ± 0.03 | 0.81 ± 0.00 | 21.65               | 13,427 |
| PHYSICS, APPLIED                              | 1.33 ± 0.02 | 0.89 ± 0.00 | 19.26               | 7,536  |
| PHYSICS, ATOMIC, MOLECULAR & CHEMICAL         | 1.63 ± 0.08 | 0.94 ± 0.01 | 33.17               | 6,966  |
| PHYSICS, CONDENSED MATTER                     | 1.79 ± 0.05 | 0.88 ± 0.01 | 26.35               | 6,787  |
| PHYSICS, FLUIDS & PLASMAS                     | 1.69 ± 0.04 | 0.86 ± 0.01 | 22.49               | 1,383  |
| PHYSICS, MATHEMATICAL                         | 0.61 ± 0.02 | 1.06 ± 0.01 | 19.06               | 1,394  |
| PHYSICS, MULTIDISCIPLINARY                    | 0.74 ± 0.01 | 1.11 ± 0.00 | 27.89               | 7,853  |
| PHYSICS, NUCLEAR                              | 0.99 ± 0.05 | 0.95 ± 0.01 | 20.37               | 2,516  |
| PHYSICS, PARTICLES & FIELDS                   | 0.67 ± 0.03 | 1.15 ± 0.01 | 29.46               | 2,596  |
| PHYSIOLOGY                                    | 3.80 ± 0.05 | 0.79 ± 0.00 | 38.30               | 4,505  |
| PLANT SCIENCES                                | 2.18 ± 0.03 | 0.75 ± 0.00 | 18.96               | 7,989  |
| POLYMER SCIENCE                               | 2.20 ± 0.04 | 0.81 ± 0.00 | 23.65               | 3,010  |
| PRIMARY HEALTH CARE                           | 0.16 ± 0.02 | 1.01 ± 0.02 | 3.87                | 690    |
| PSYCHIATRY                                    | 1.52 ± 0.02 | 0.96 ± 0.00 | 29.31               | 4,330  |
| PSYCHOLOGY                                    | 2.00 ± 0.07 | 0.92 ± 0.01 | 35.48               | 1,442  |
| PUBLIC, ENVIRONMENTAL & OCCUPATIONAL HEALTH   | 0.98 ± 0.01 | 0.98 ± 0.00 | 21.04               | 4,024  |
| RADIOLOGY, NUCLEAR MEDICINE & MEDICAL IMAGING | 1.37 ± 0.02 | 0.90 ± 0.00 | 20.58               | 5,504  |
| REHABILITATION                                | 0.71 ± 0.03 | 0.95 ± 0.01 | 14.12               | 392    |

Table S19: Publication year 1985.

| Subject-category                    | $a$                               | $\alpha$                          | $\langle c \rangle$ | $N$            |
|-------------------------------------|-----------------------------------|-----------------------------------|---------------------|----------------|
| REMOTE SENSING                      | $0.78 \pm 0.03$                   | $1.03 \pm 0.01$                   | 21.10               | 611            |
| REPRODUCTIVE BIOLOGY                | $2.71 \pm 0.05$                   | $0.74 \pm 0.00$                   | 22.81               | 1,085          |
| RESPIRATORY SYSTEM                  | $1.45 \pm 0.04$                   | $0.86 \pm 0.01$                   | 19.14               | 1,844          |
| RHEUMATOLOGY                        | $1.53 \pm 0.03$                   | $0.89 \pm 0.01$                   | 22.40               | 1,126          |
| ROBOTICS                            | $0.28 \pm 0.03$                   | $1.42 \pm 0.04$                   | 39.95               | 43             |
| SOIL SCIENCE                        | $1.91 \pm 0.04$                   | $0.80 \pm 0.00$                   | 20.52               | 1,603          |
| SPECTROSCOPY                        | $1.44 \pm 0.06$                   | $0.82 \pm 0.01$                   | 18.56               | 2,549          |
| SPORT SCIENCES                      | $2.29 \pm 0.03$                   | $0.84 \pm 0.00$                   | 27.90               | 1,517          |
| STATISTICS & PROBABILITY            | $0.36 \pm 0.02$                   | $1.20 \pm 0.01$                   | 19.42               | 2,295          |
| SUBSTANCE ABUSE                     | $2.86 \pm 0.09$                   | $0.70 \pm 0.01$                   | 20.19               | 410            |
| SURGERY                             | $1.67 \pm 0.02$                   | $0.86 \pm 0.00$                   | 21.32               | 9,570          |
| TELECOMMUNICATIONS                  | $0.24 \pm 0.01$                   | $1.16 \pm 0.01$                   | 10.89               | 1,319          |
| THERMODYNAMICS                      | $0.88 \pm 0.03$                   | $0.88 \pm 0.01$                   | 13.22               | 1,500          |
| TOXICOLOGY                          | $2.32 \pm 0.05$                   | $0.71 \pm 0.00$                   | 17.52               | 2,618          |
| TRANSPLANTATION                     | $0.85 \pm 0.04$                   | $0.93 \pm 0.01$                   | 14.53               | 1,375          |
| TRANSPORTATION SCIENCE & TECHNOLOGY | $0.10 \pm 0.01$                   | $1.22 \pm 0.03$                   | 5.47                | 386            |
| TROPICAL MEDICINE                   | $1.36 \pm 0.05$                   | $0.81 \pm 0.01$                   | 14.70               | 790            |
| UROLOGY & NEPHROLOGY                | $1.18 \pm 0.02$                   | $0.89 \pm 0.00$                   | 17.73               | 2,238          |
| VETERINARY SCIENCES                 | $1.43 \pm 0.05$                   | $0.72 \pm 0.01$                   | 11.13               | 4,175          |
| VIROLOGY                            | $3.73 \pm 0.05$                   | $0.76 \pm 0.00$                   | 34.07               | 1,862          |
| WATER RESOURCES                     | $0.95 \pm 0.02$                   | $0.92 \pm 0.01$                   | 15.58               | 1,944          |
| ZOOLOGY                             | $1.83 \pm 0.03$                   | $0.86 \pm 0.00$                   | 23.93               | 4,233          |
| <b>TOTAL</b>                        | <b><math>1.00 \pm 0.00</math></b> | <b><math>1.00 \pm 0.00</math></b> | <b>24.13</b>        | <b>470,680</b> |

Table S20: Publication year 1985.

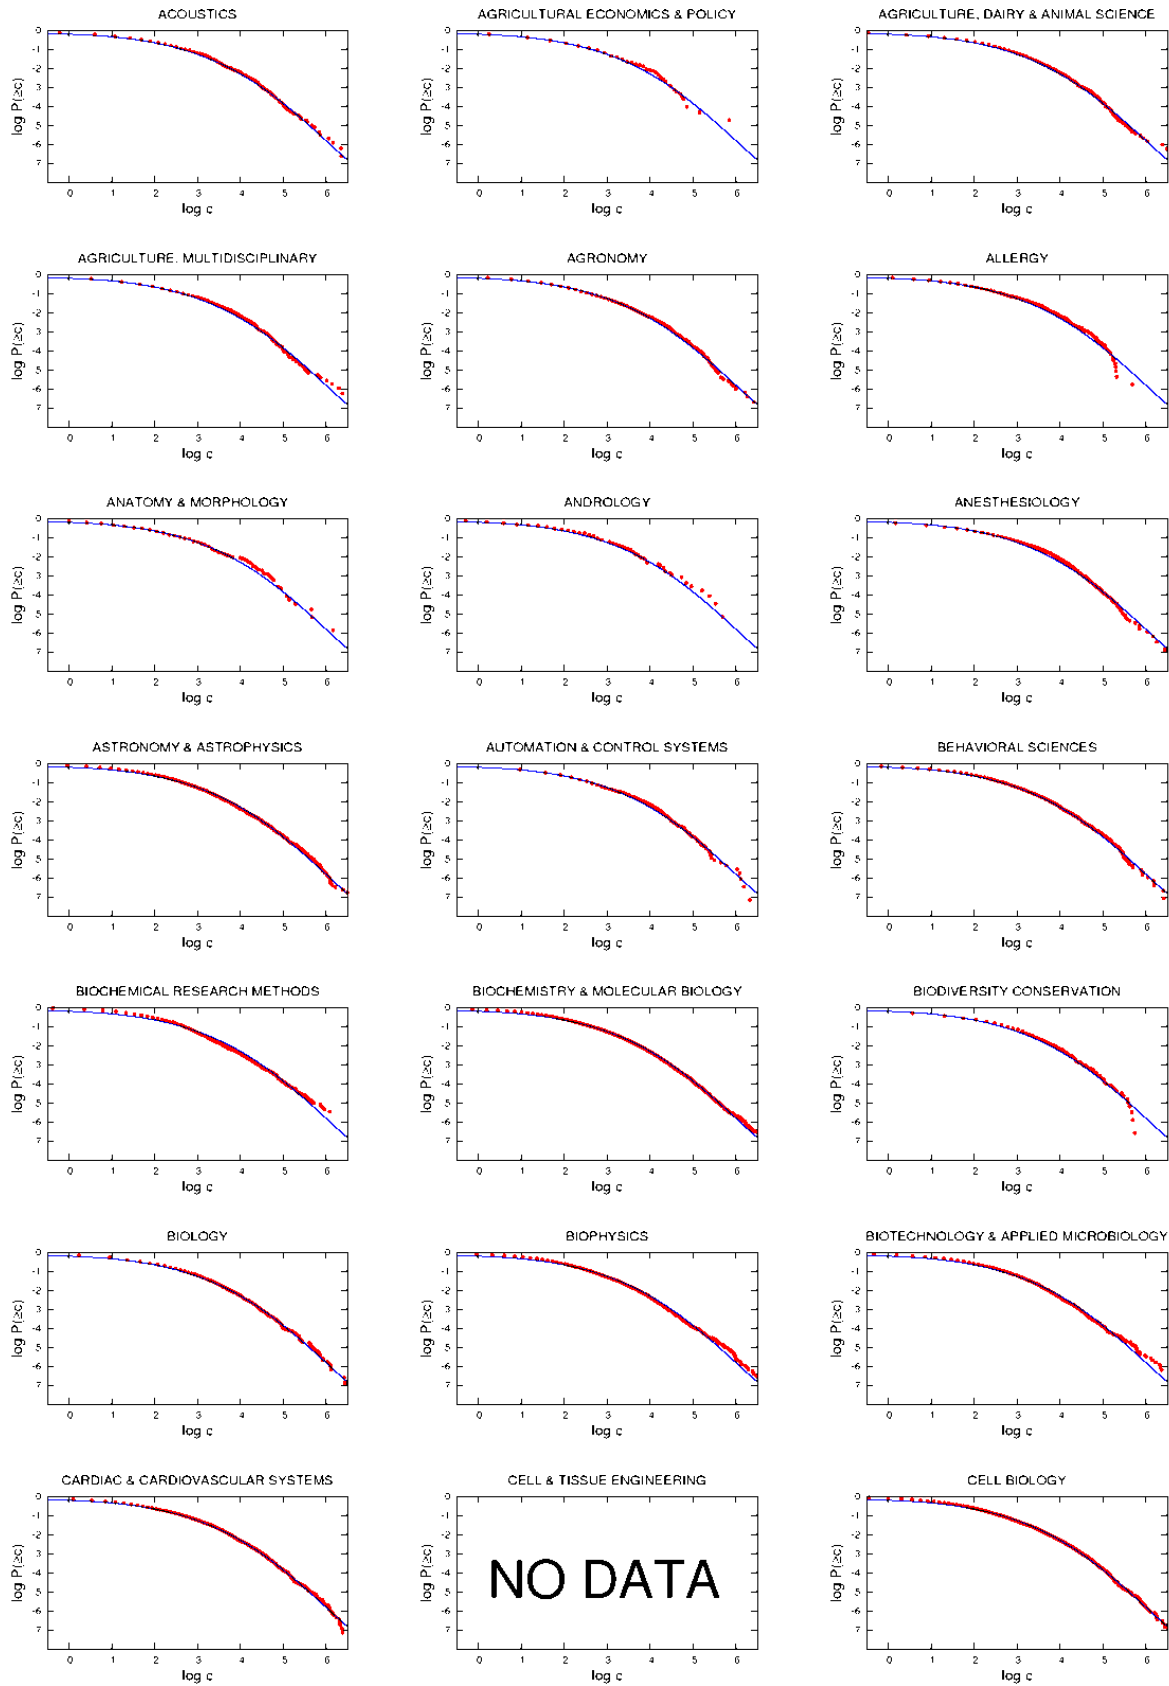

Figure S29: Publication year 1985.

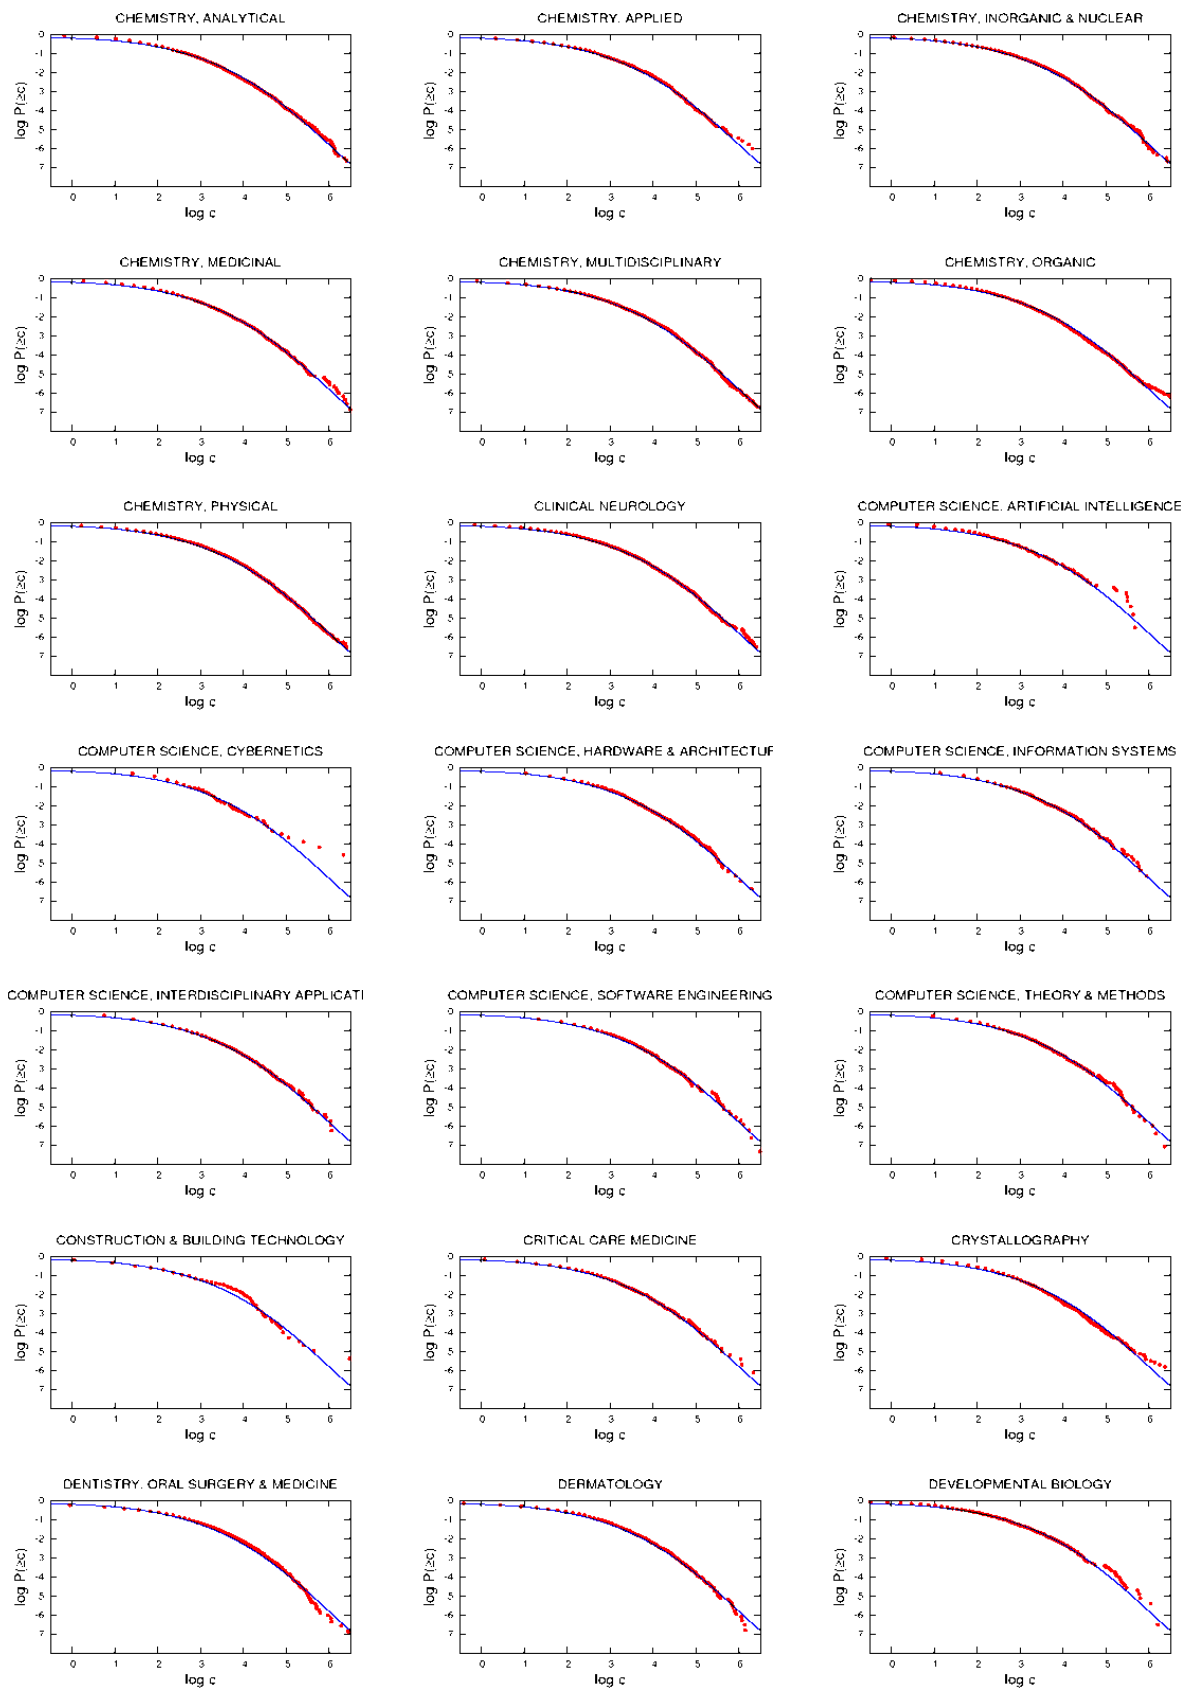

Figure S30: Publication year 1985.

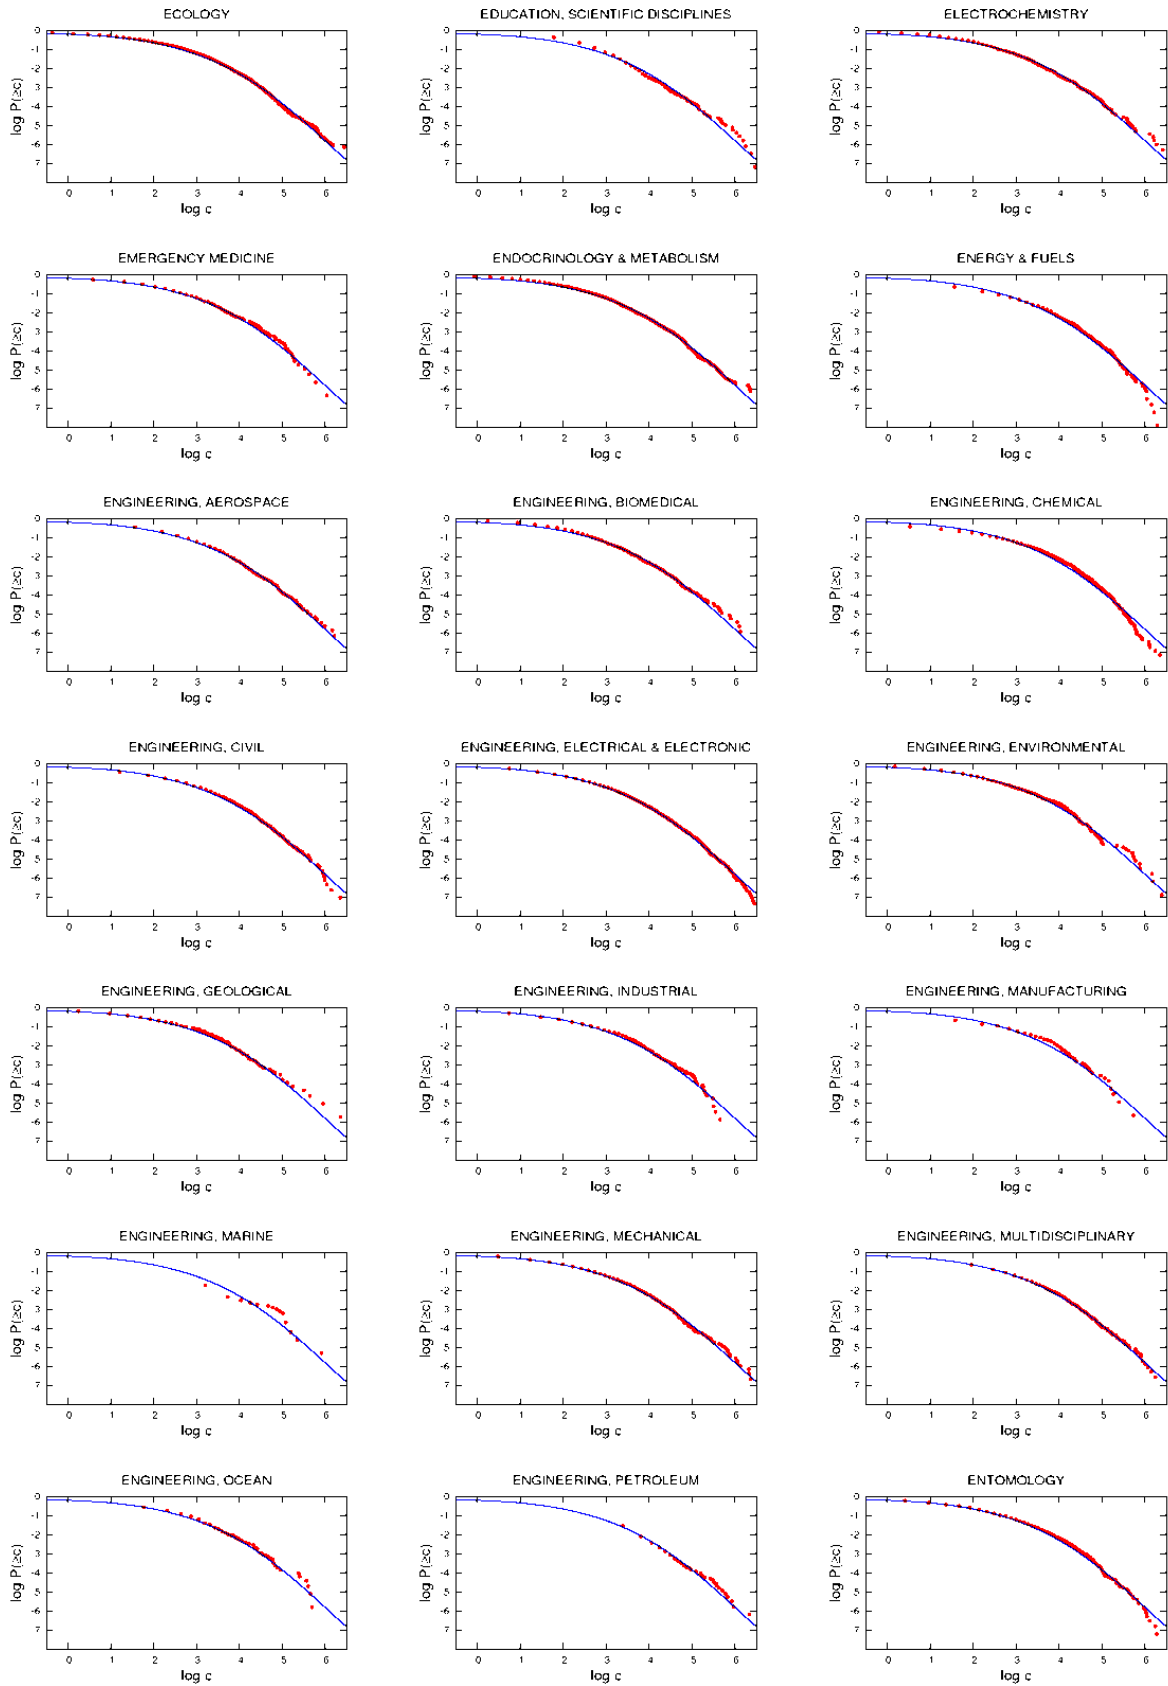

Figure S31: Publication year 1985.



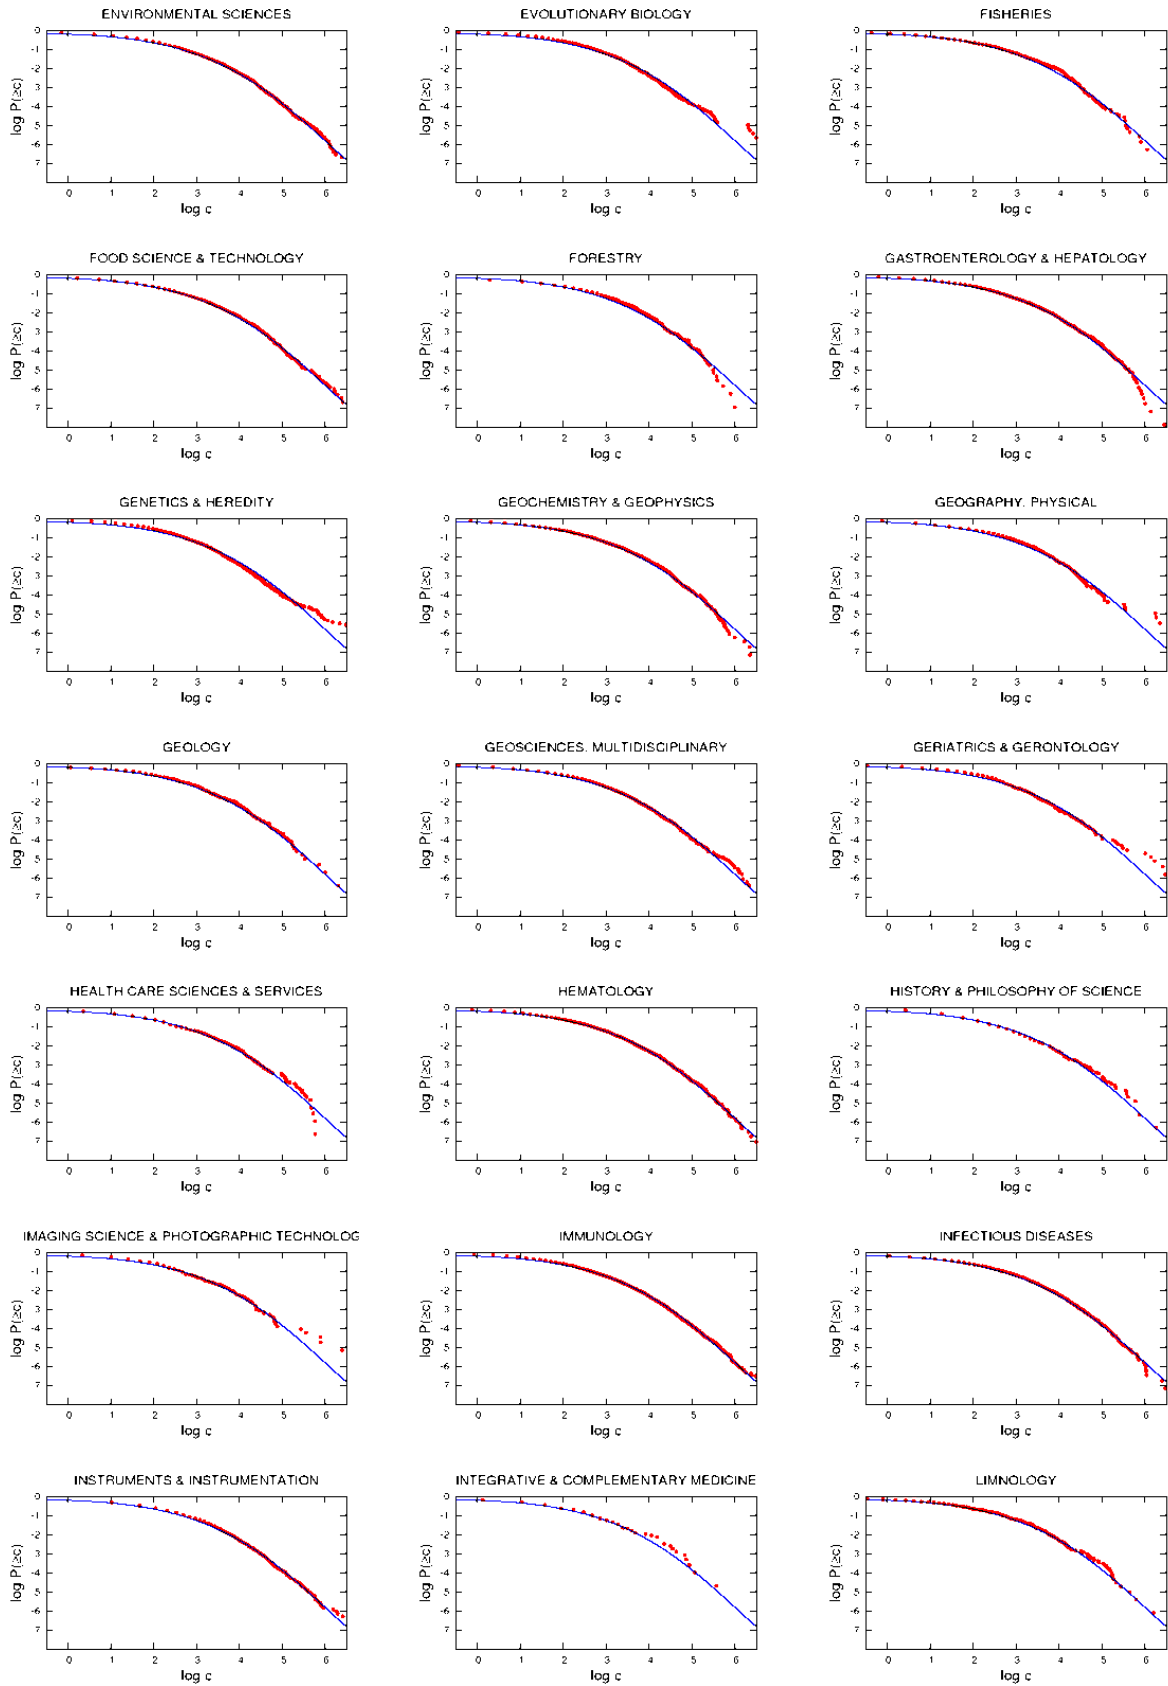

Figure S32: Publication year 1985.

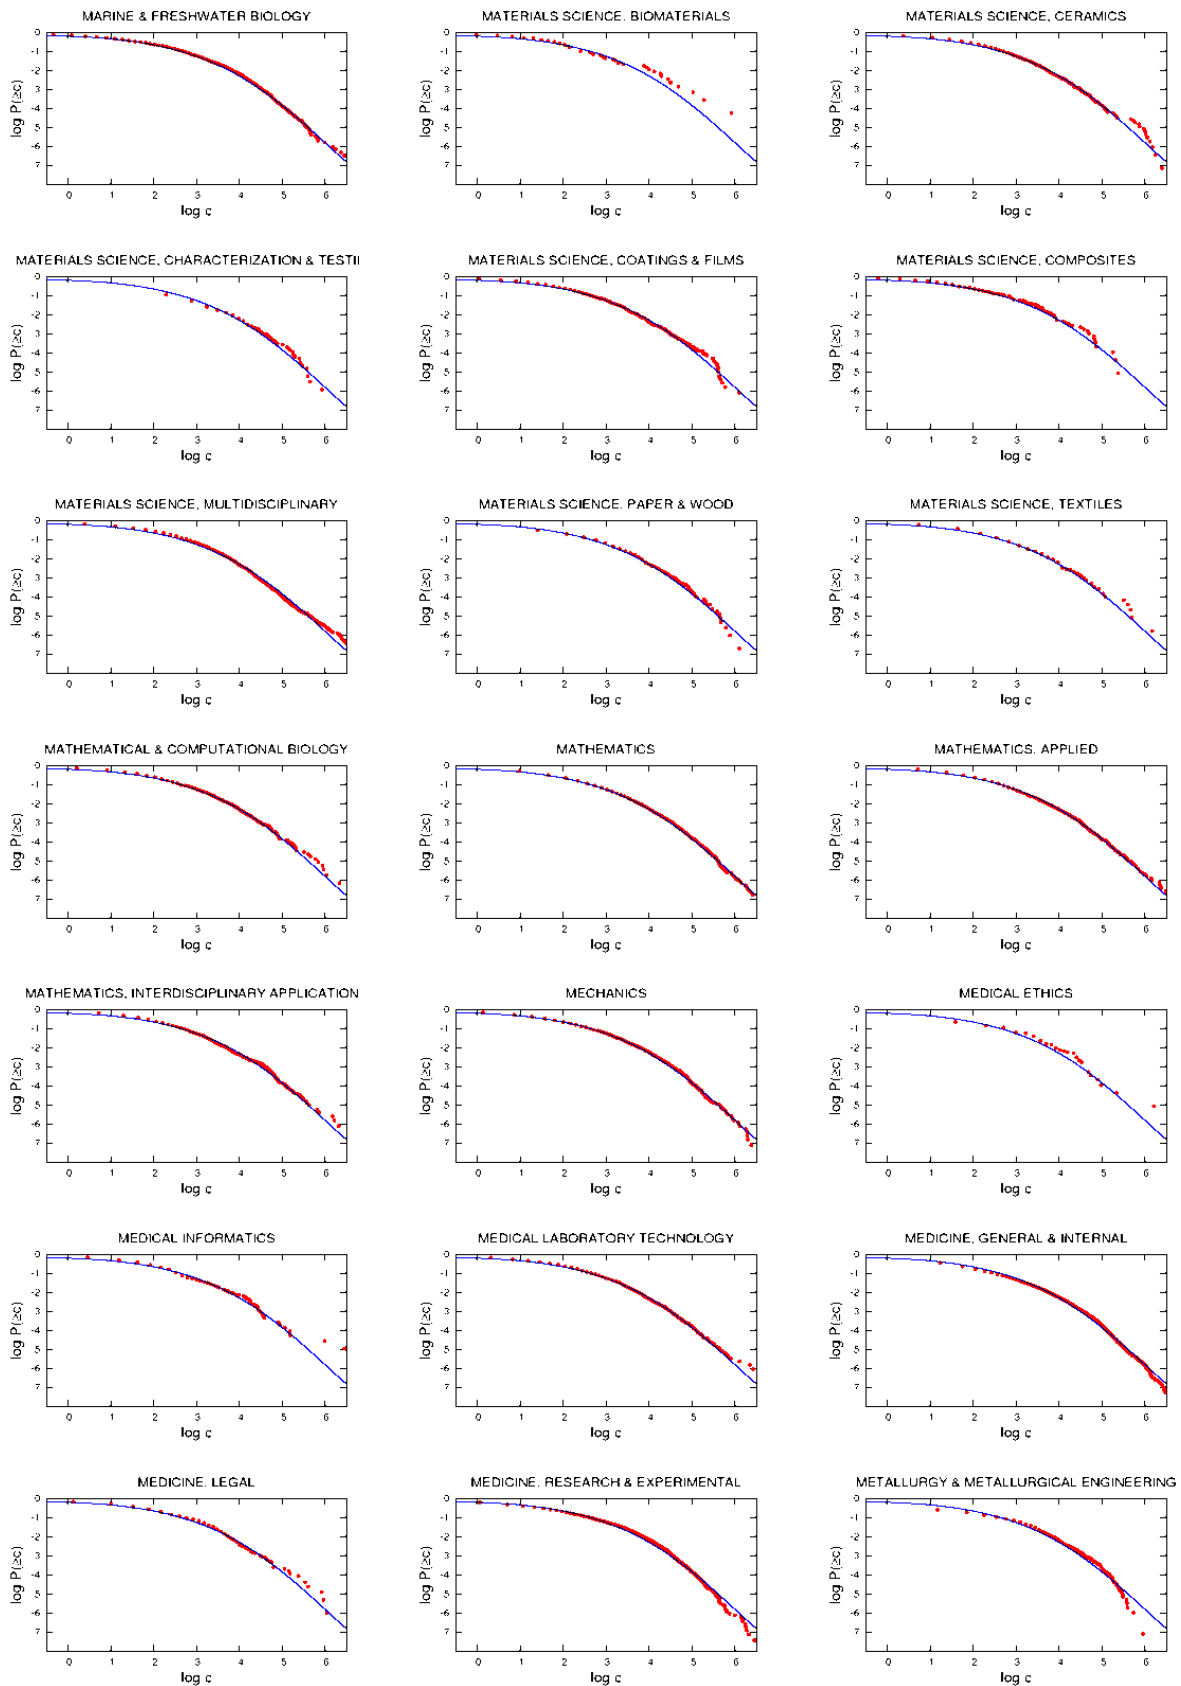

Figure S33: Publication year 1985.

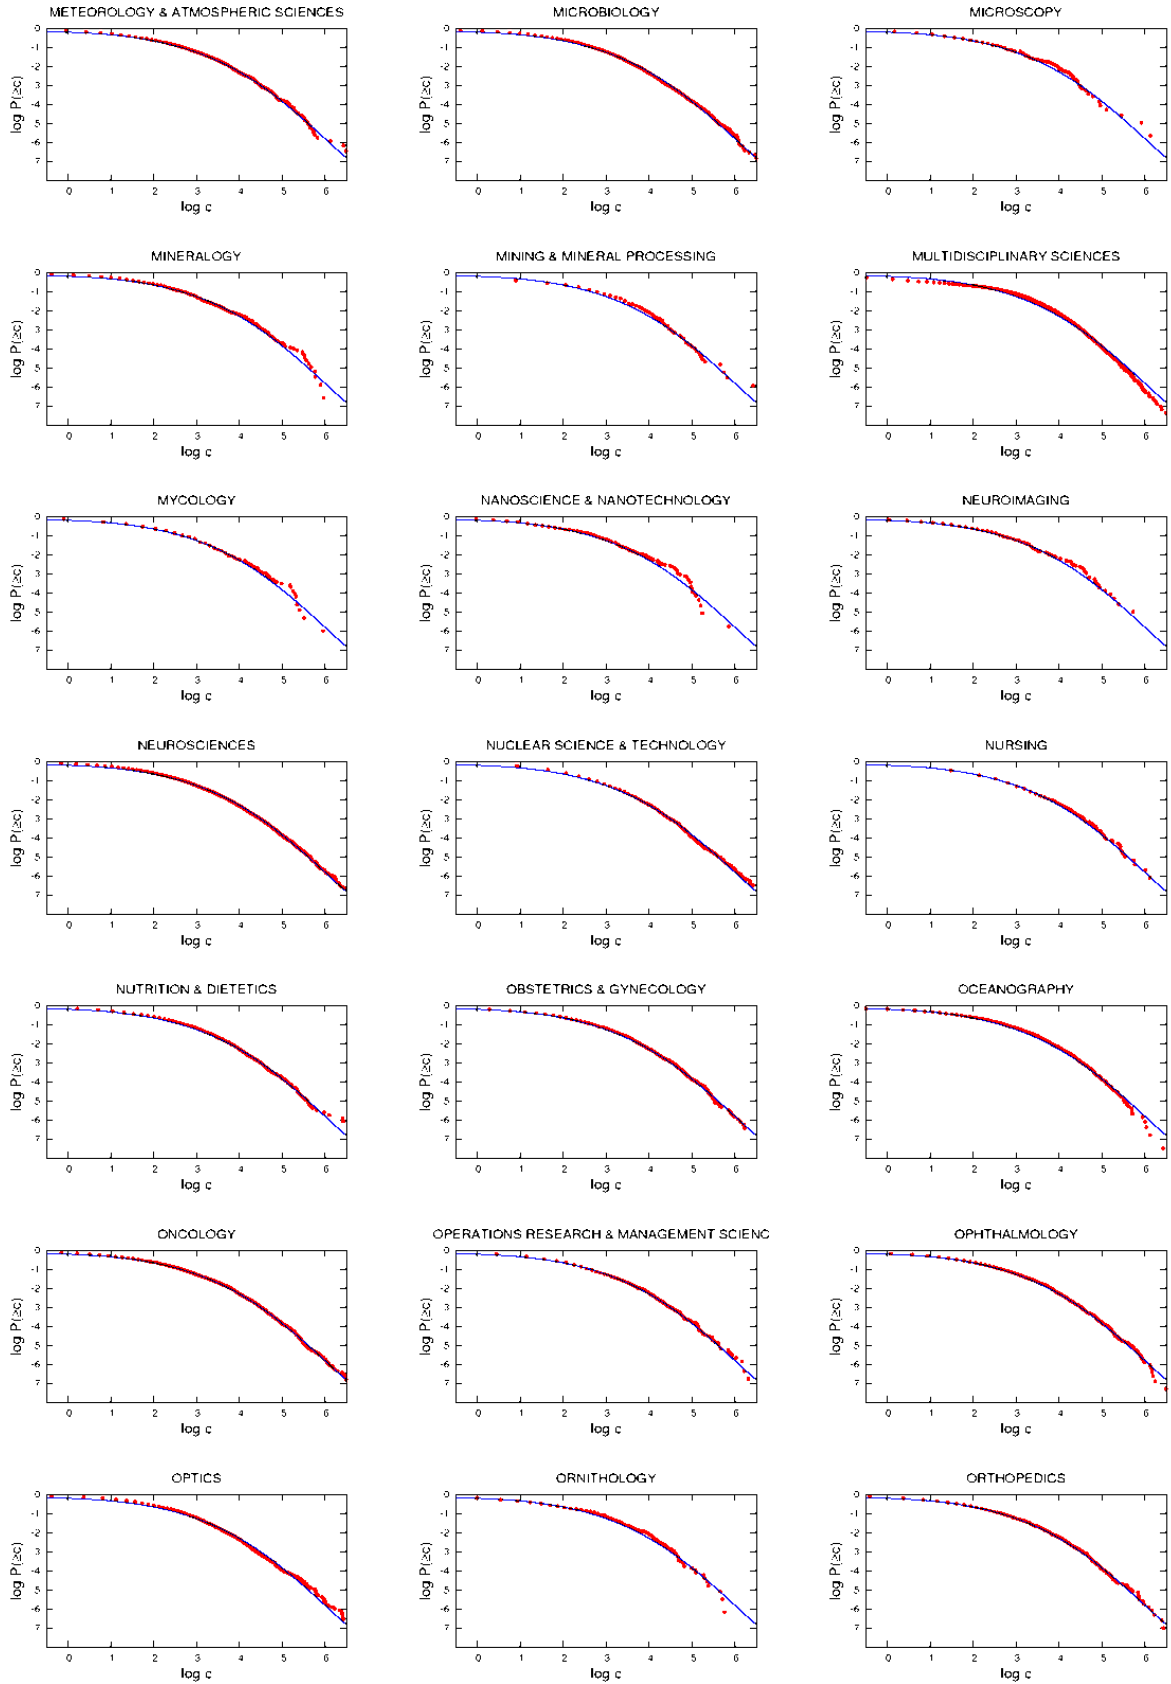

Figure S34: Publication year 1985.

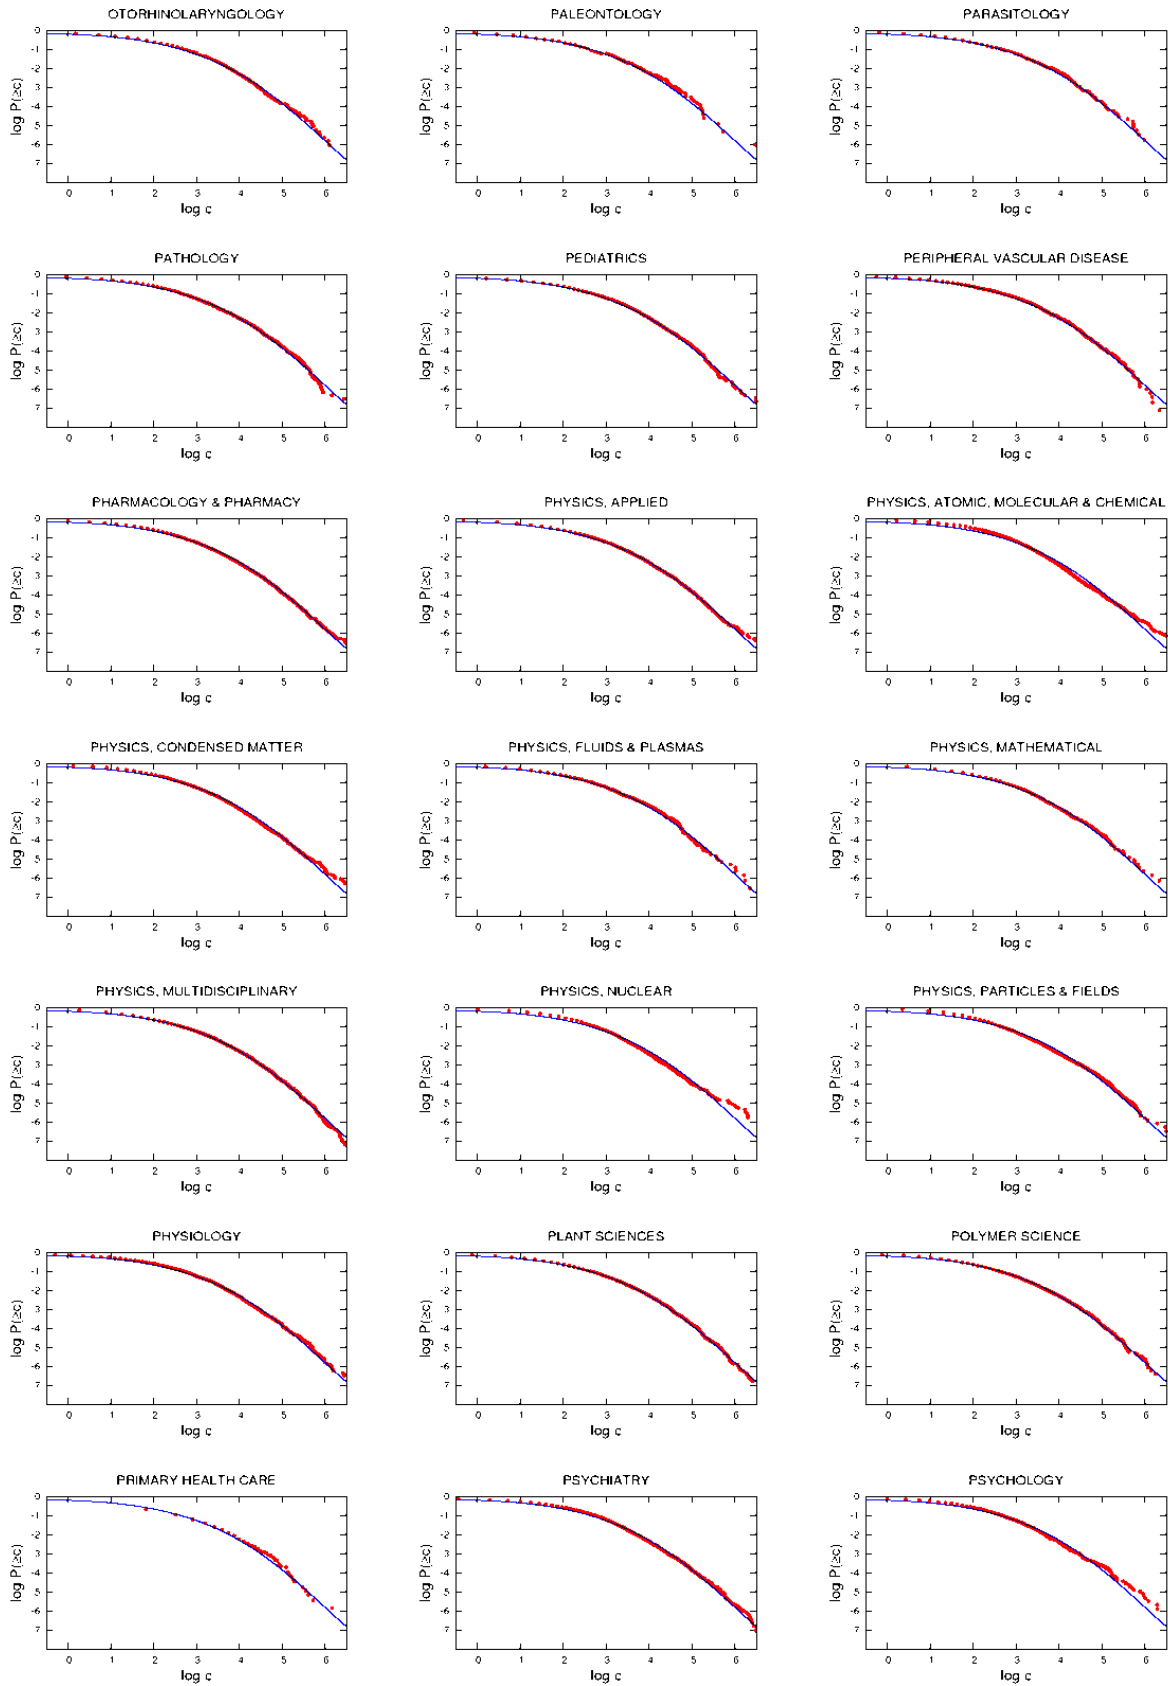

Figure S35: Publication year 1985.

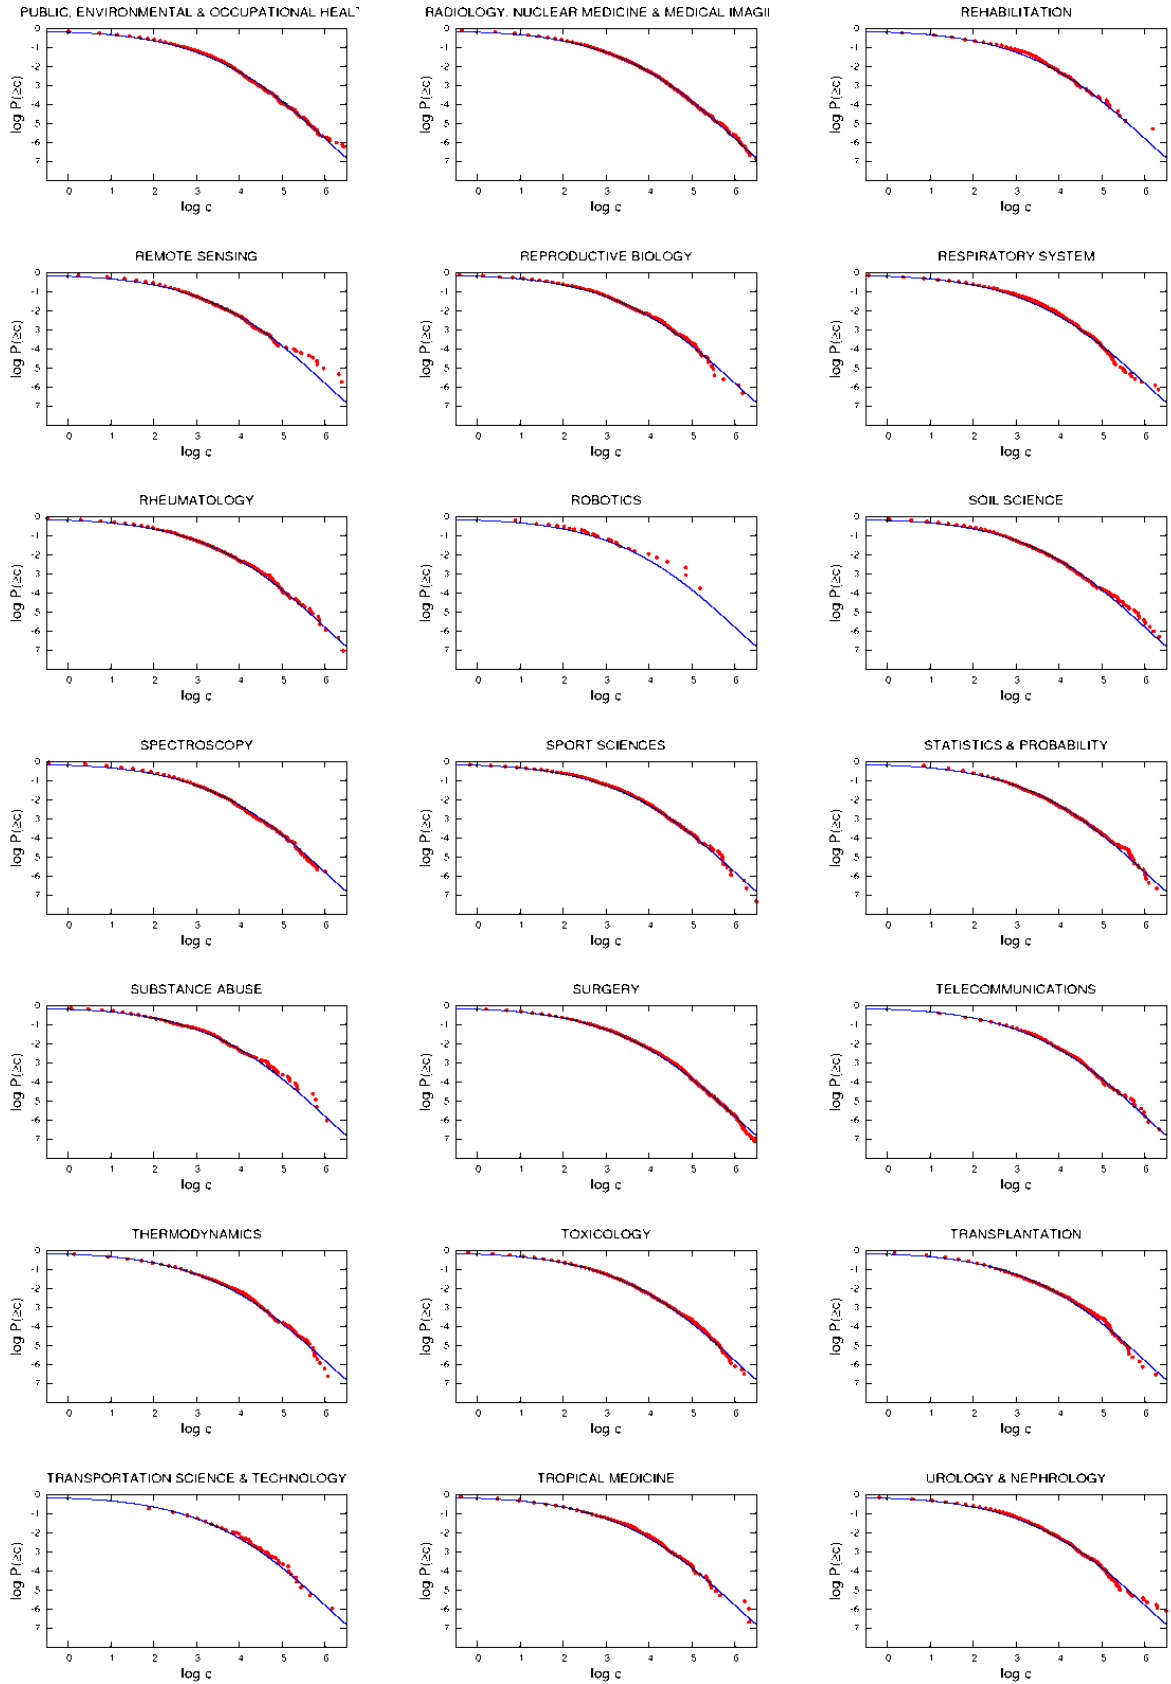

Figure S36: Publication year 1985.

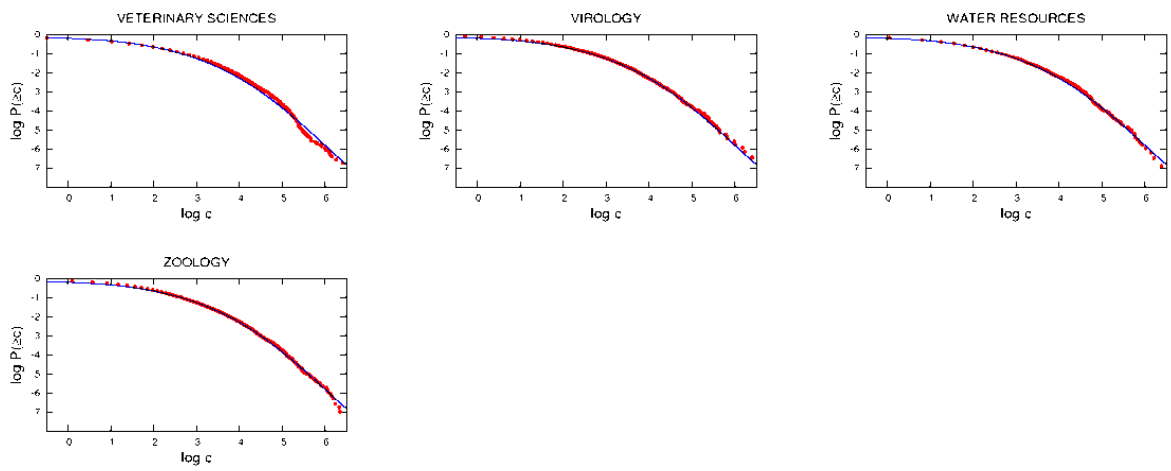

Figure S37: Publication year 1985.

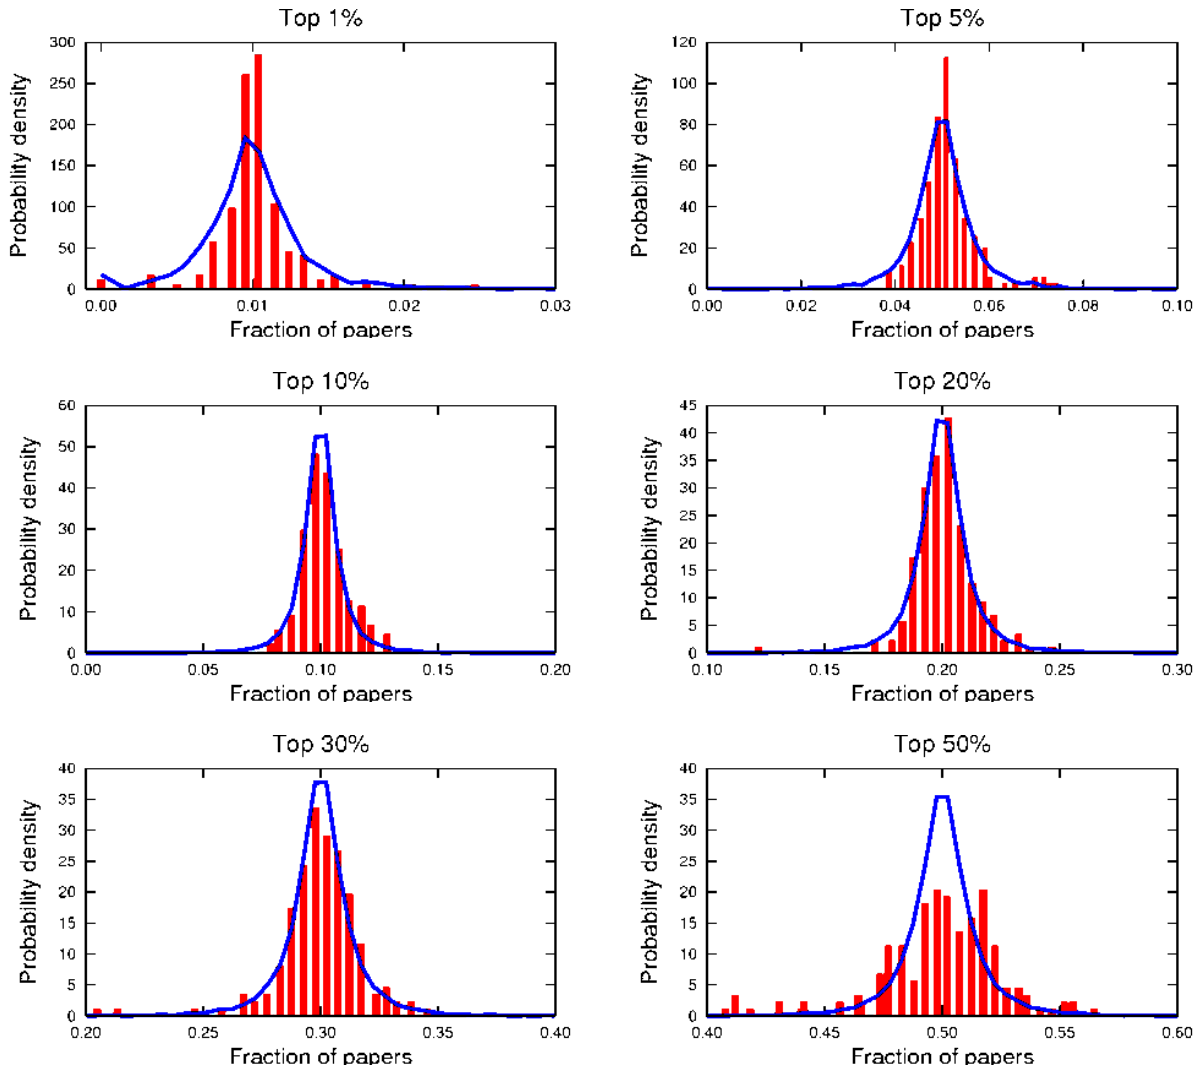

Figure S38: Publication year 1985.
