# Supplementary material for: A Reverse Engineering Approach to the Suppression of Citation Biases Reveals Universal Properties of Citation Distributions
Source: PubMed Central journal article supplement (PMC3315498; doi:10.1371/journal.pone.0033833), 2012-03-29
Supplement: pone.0033833.s004.pdf [file pone.0033833.s004.pdf]

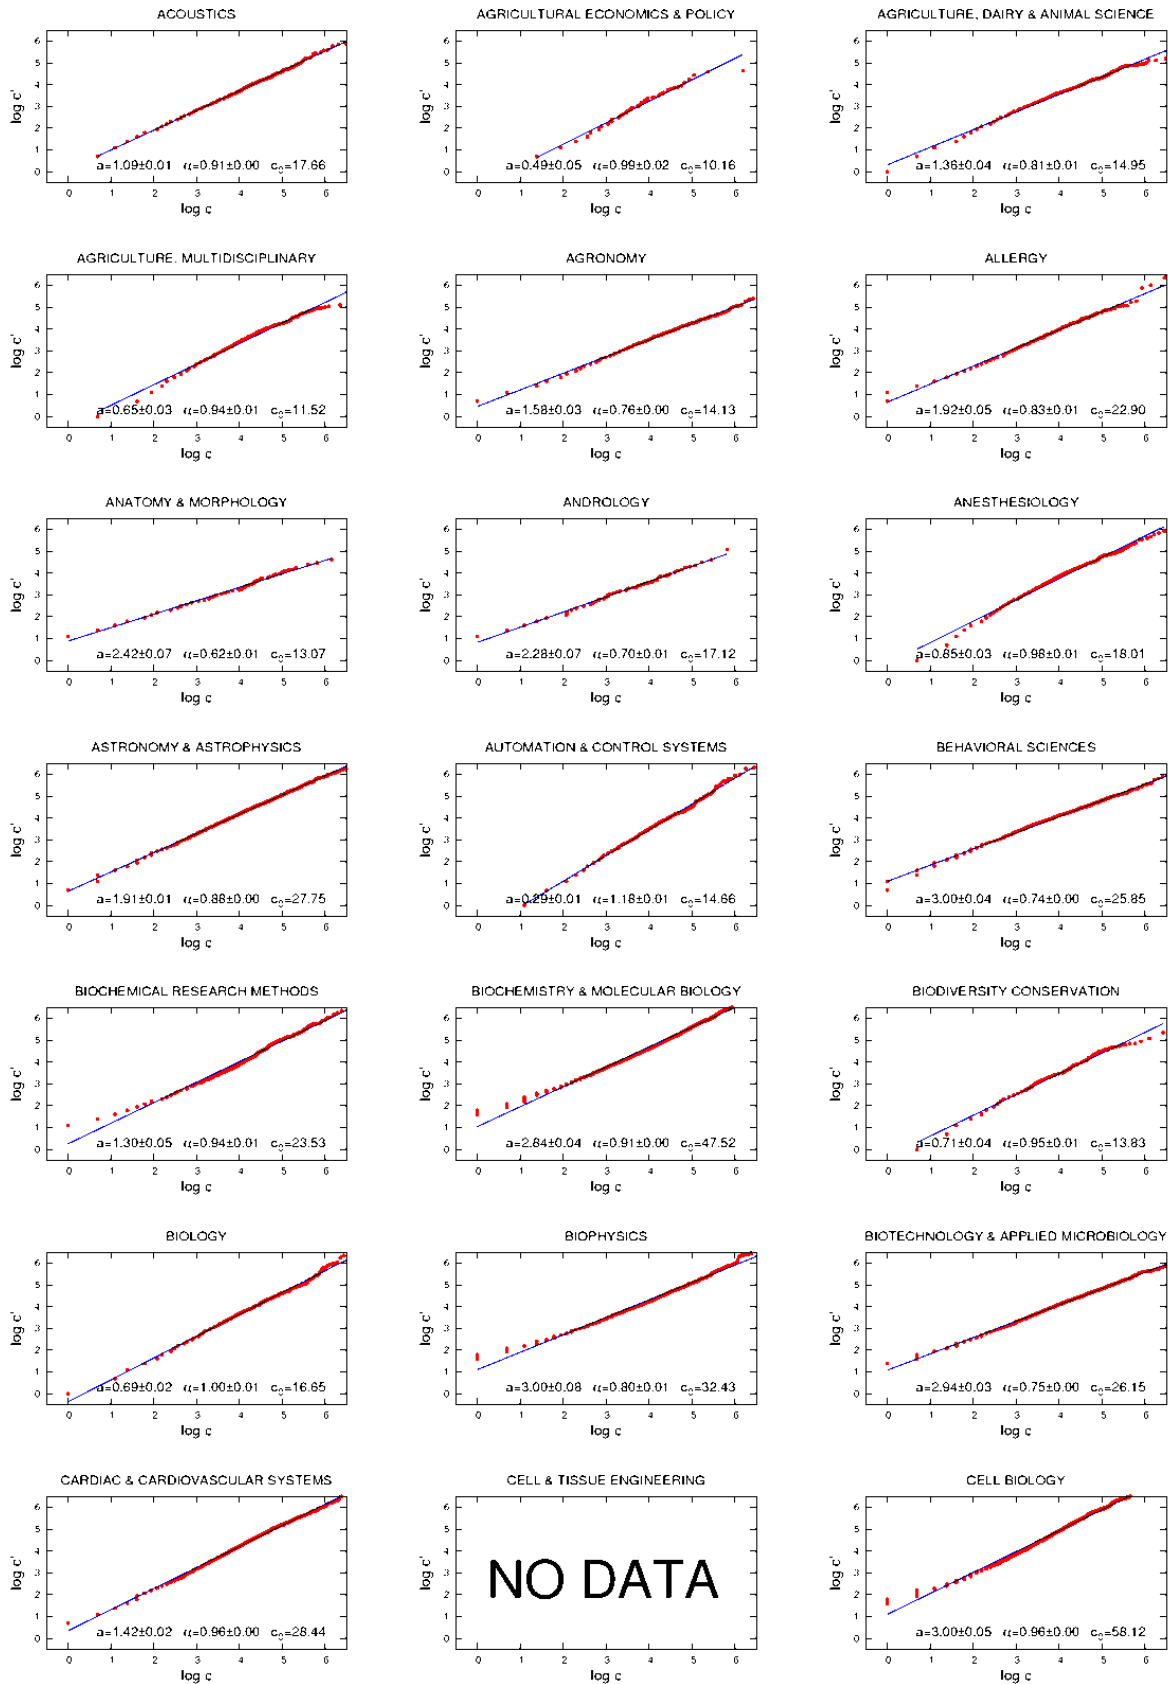

Figure S39: Publication year 1990.

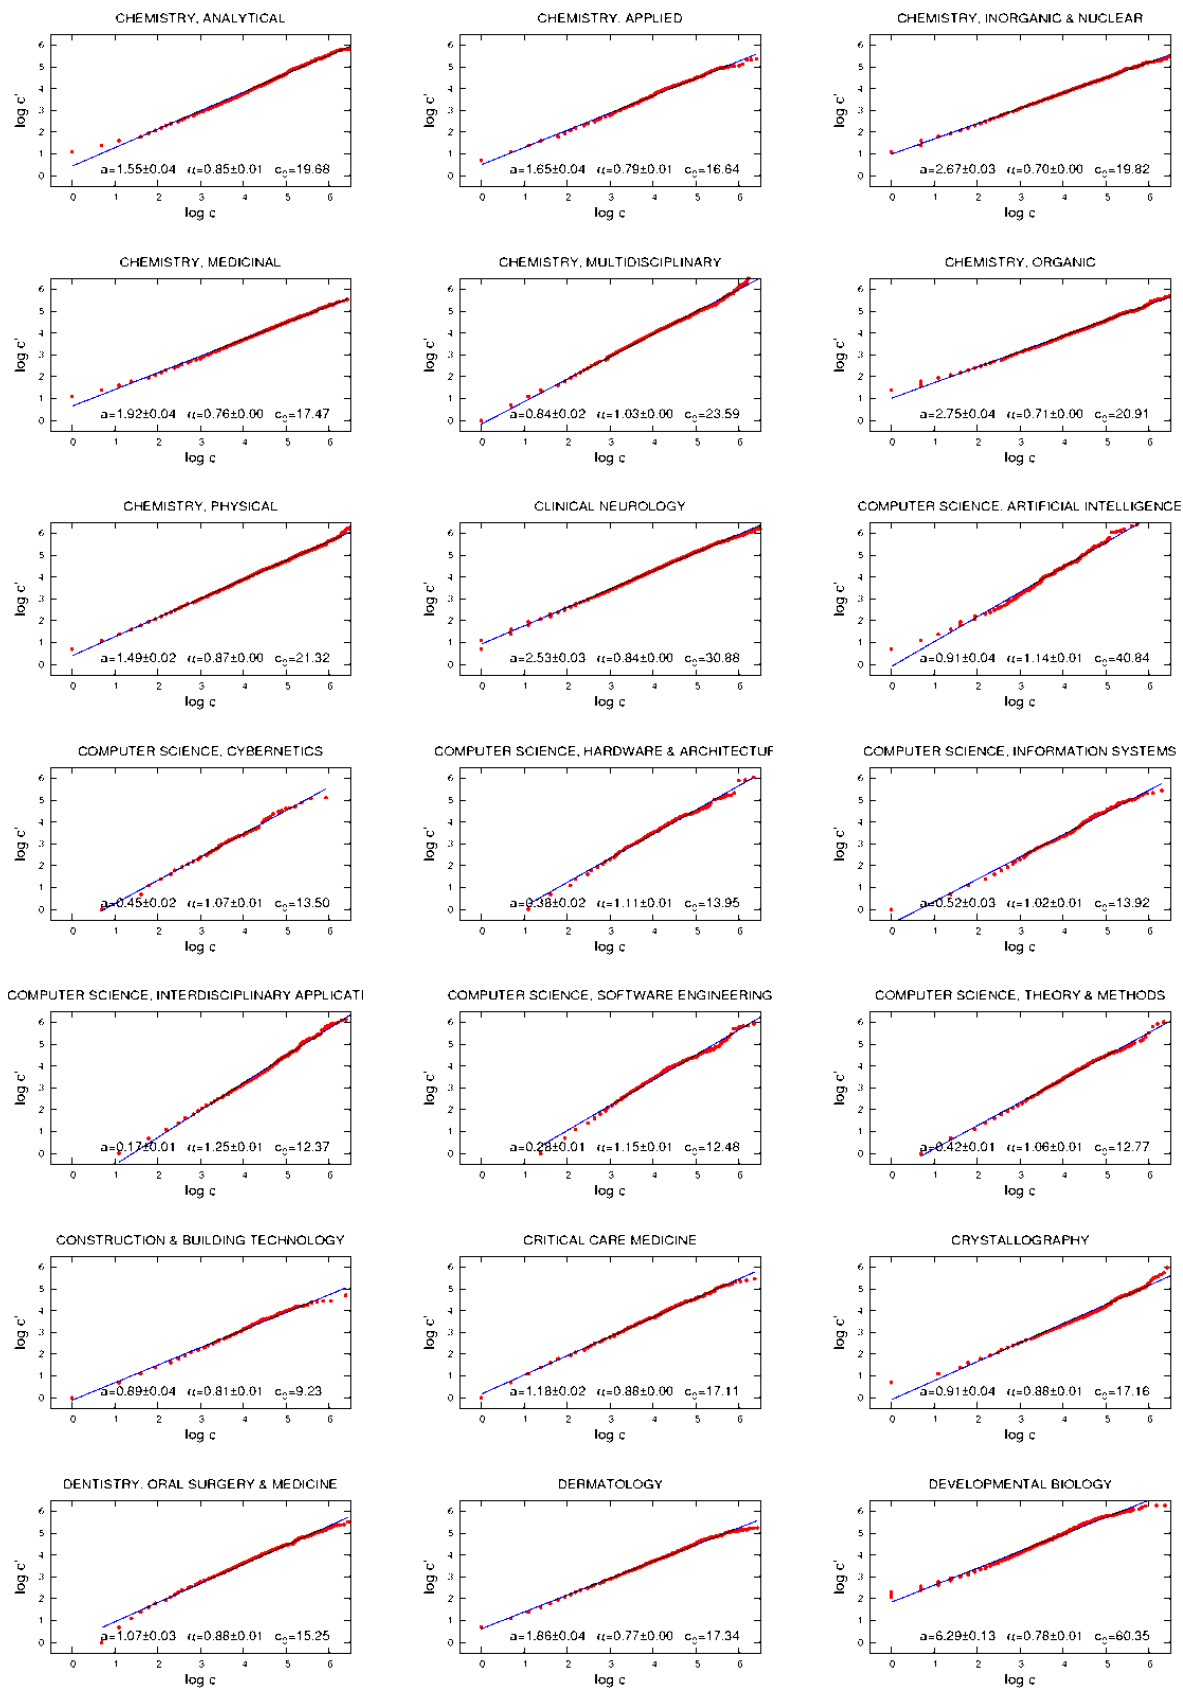

Figure S40: Publication year 1990.

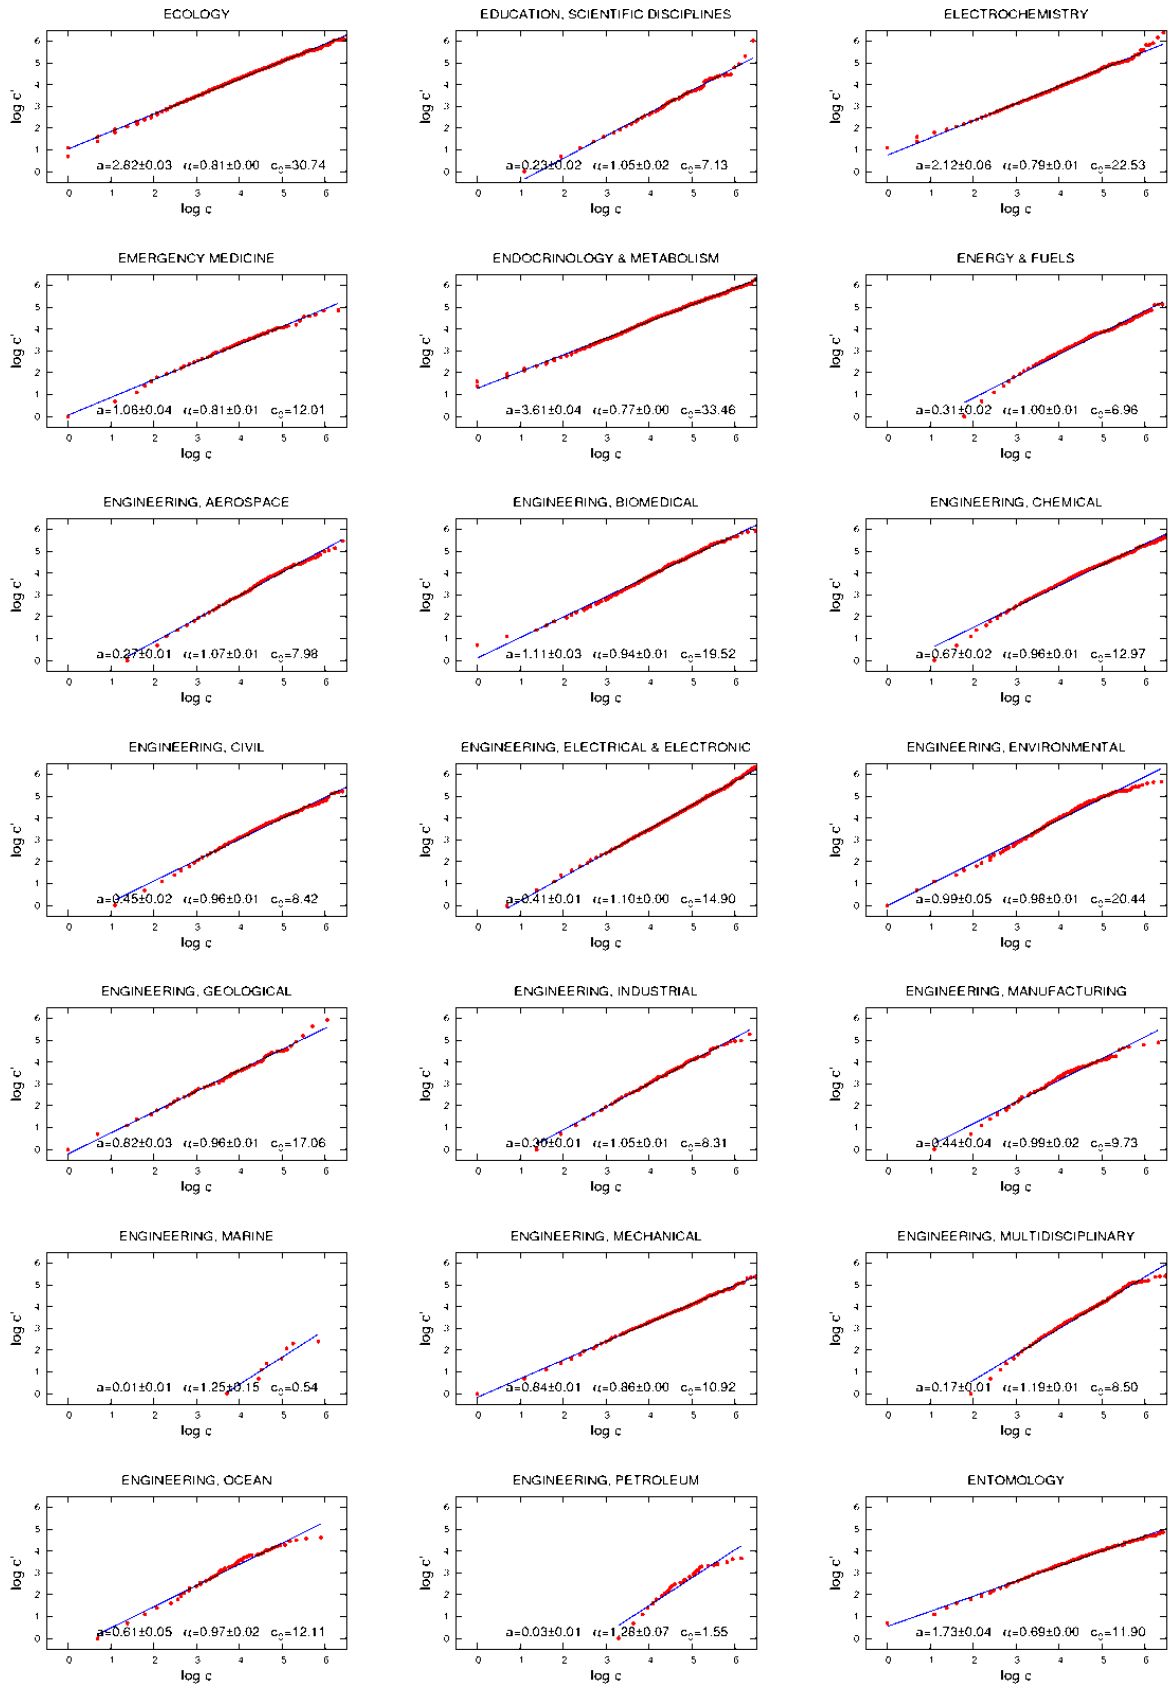

Figure S41: Publication year 1990.

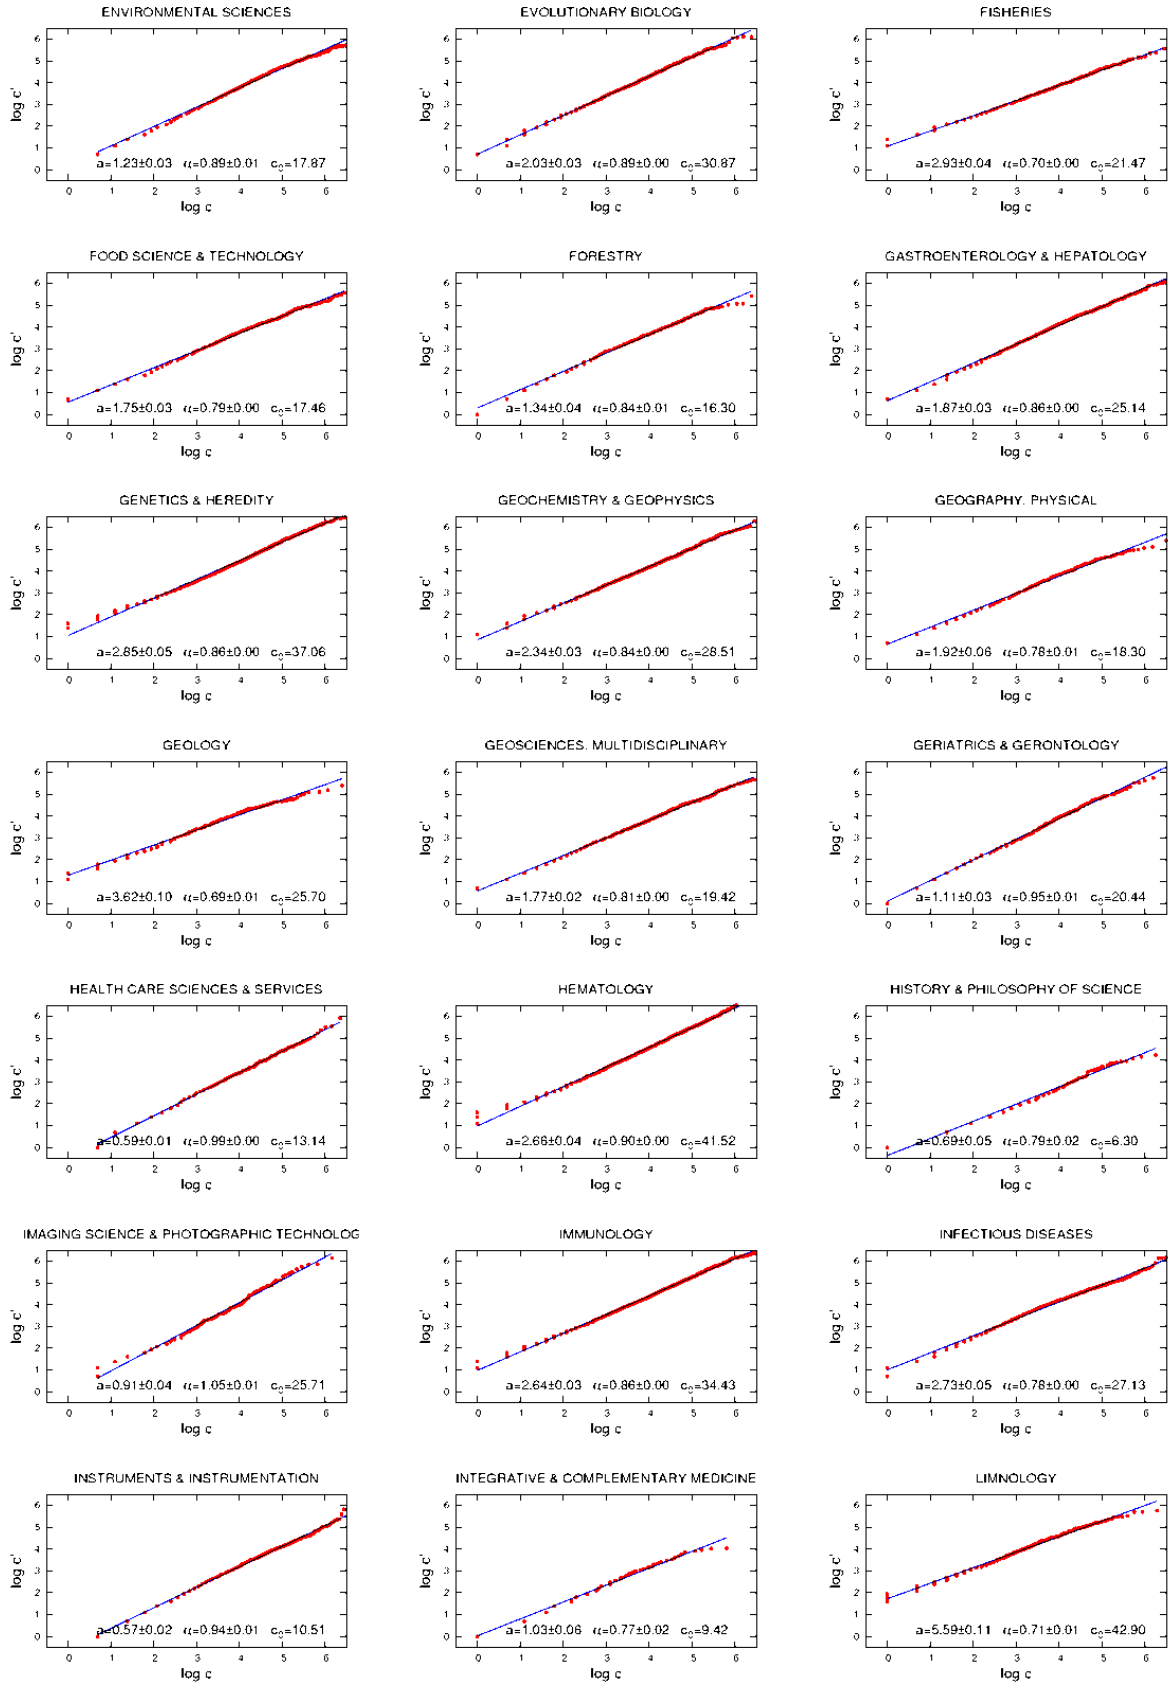

Figure S42: Publication year 1990.

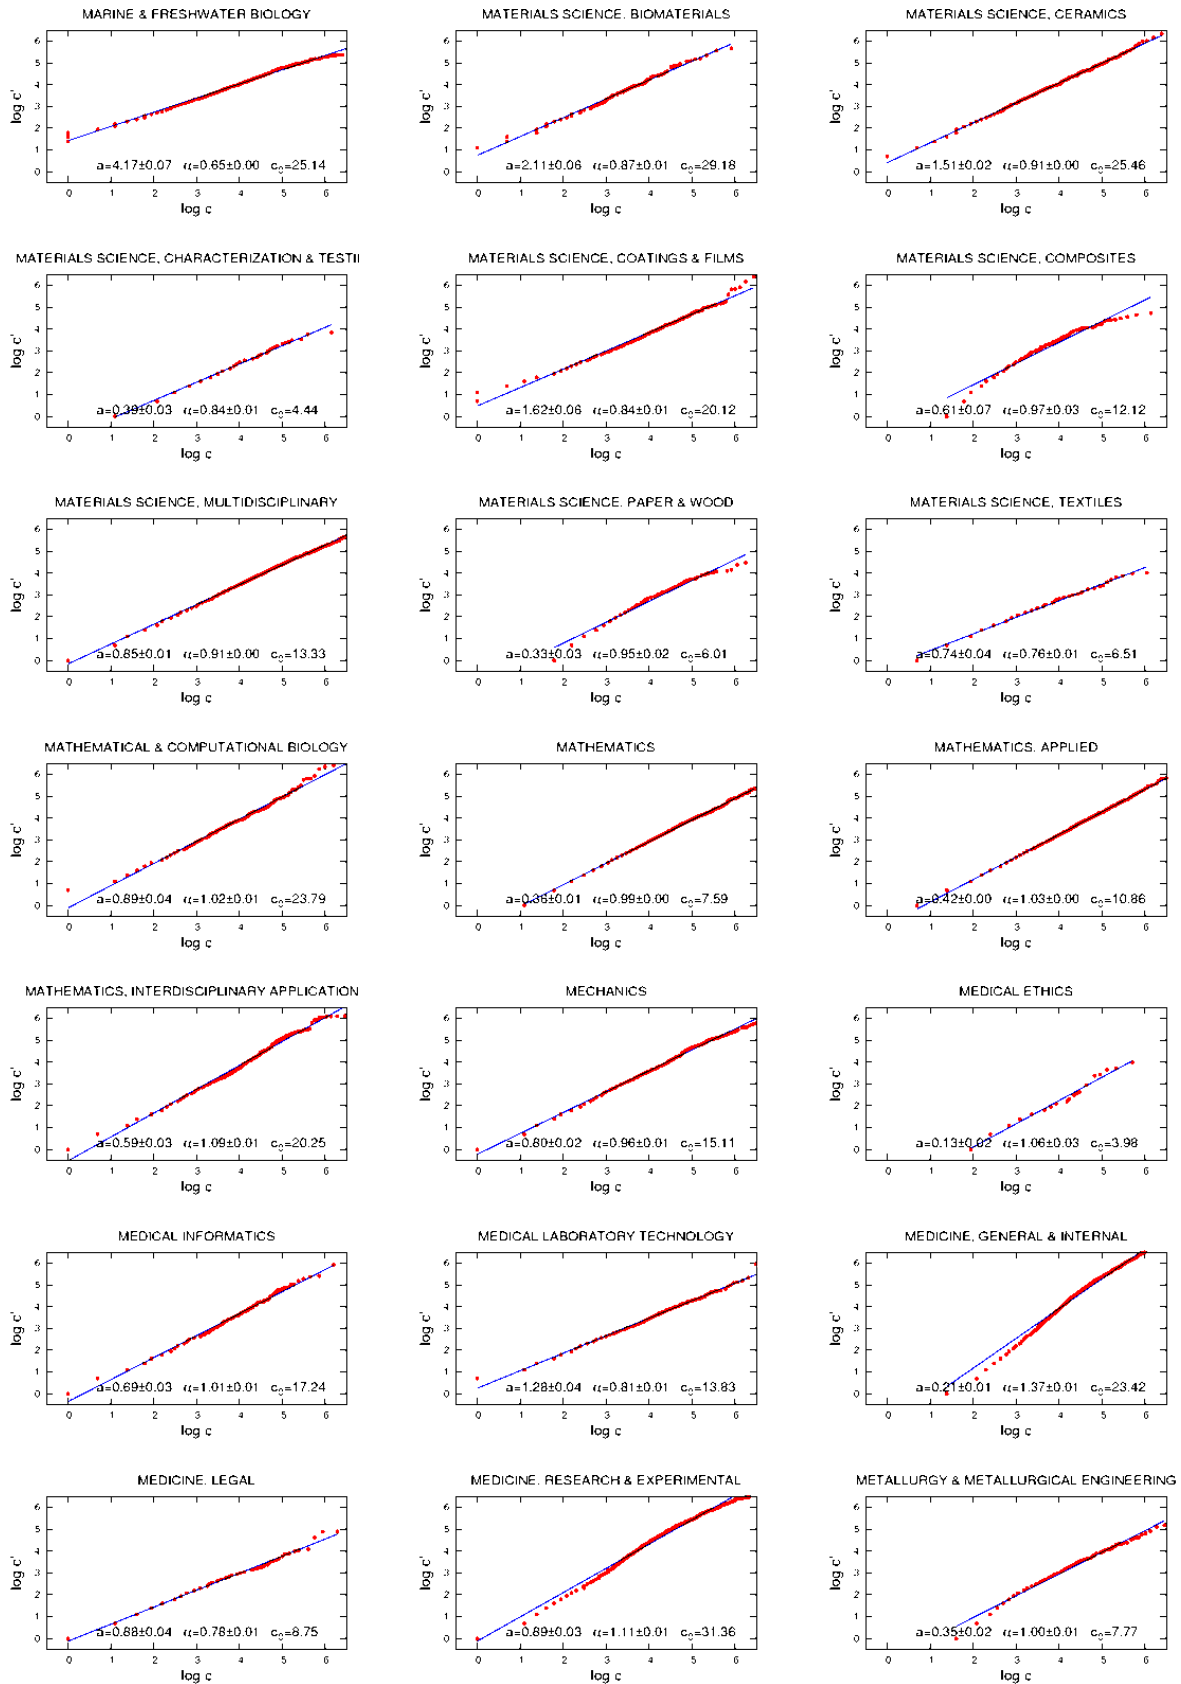

Figure S43: Publication year 1990.

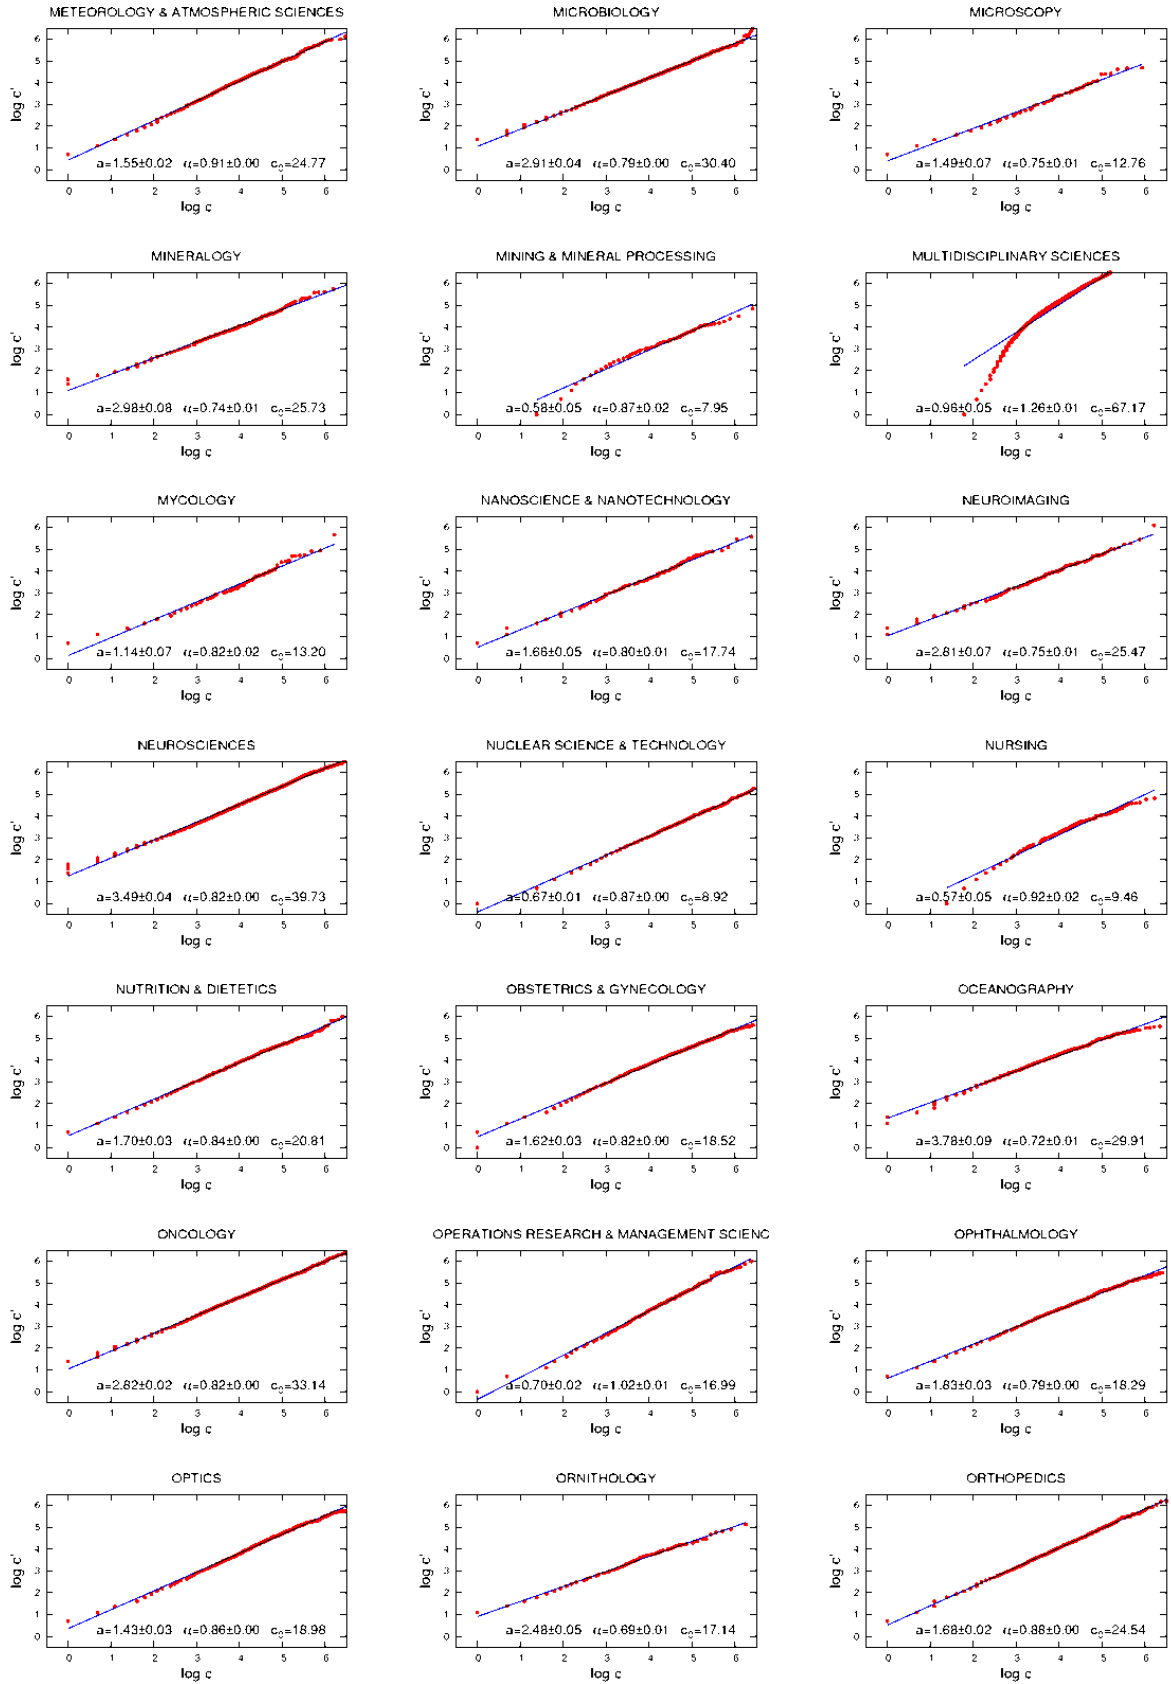

Figure S44: Publication year 1990.

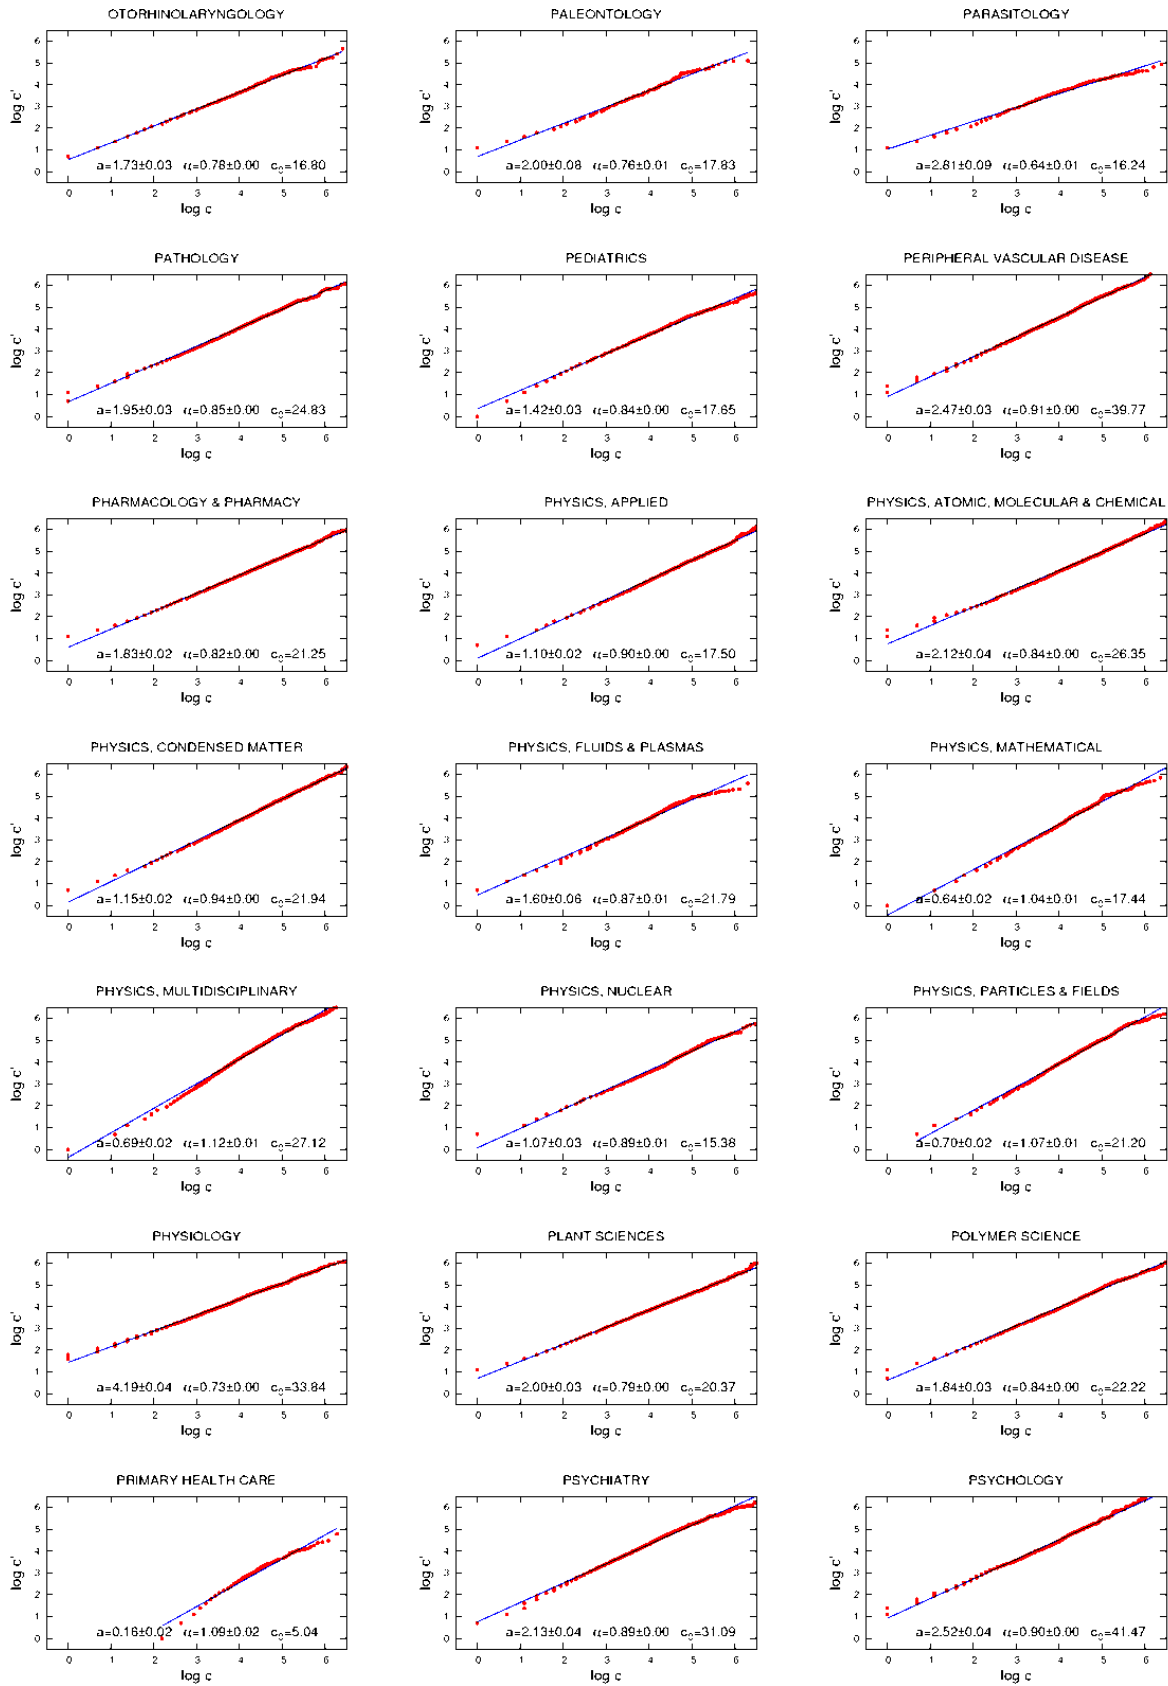

Figure S45: Publication year 1990.

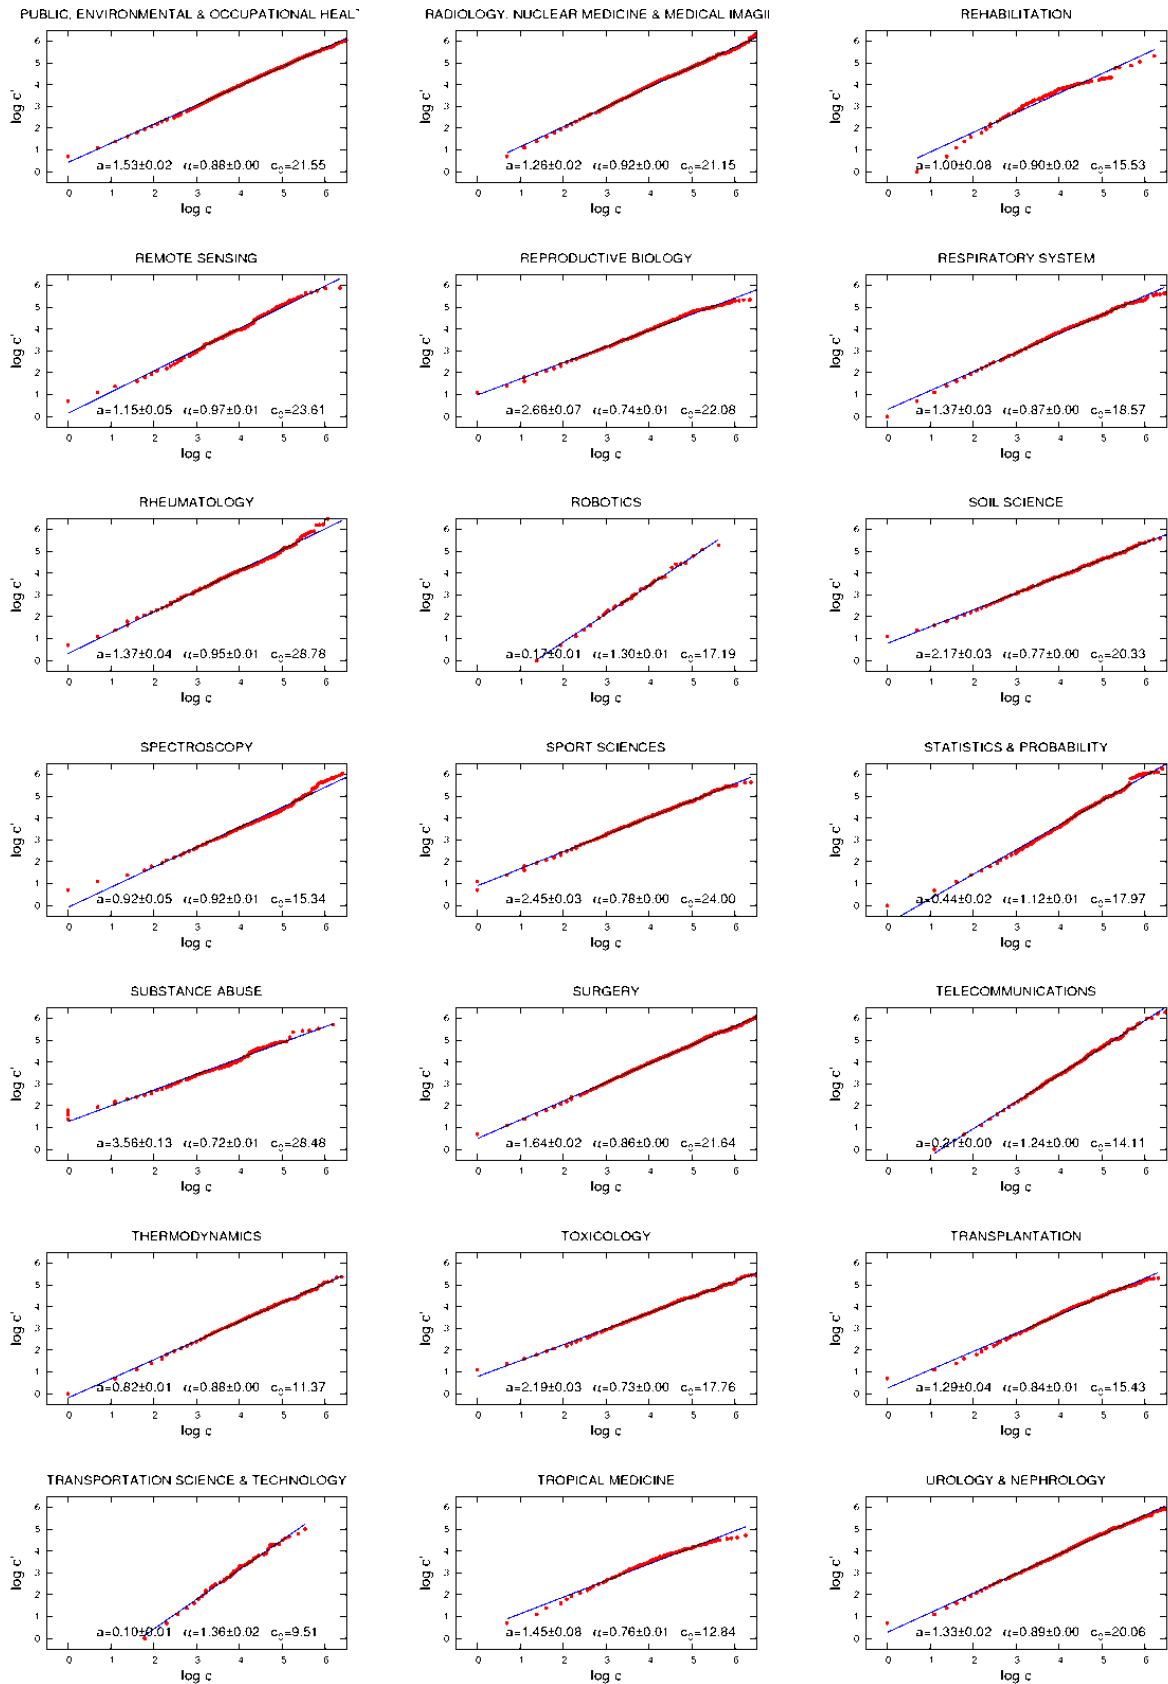

Figure S46: Publication year 1990.



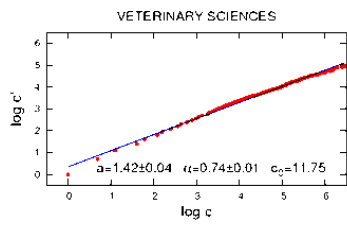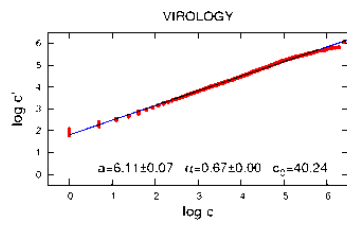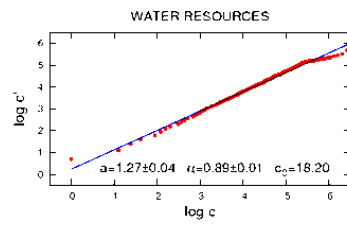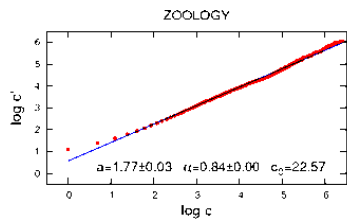

Figure S47: Publication year 1990.

| Subject-category                                 | $a$         | $\alpha$    | $\langle c \rangle$ | $N$    |
|--------------------------------------------------|-------------|-------------|---------------------|--------|
| ACOUSTICS                                        | 1.09 ± 0.01 | 0.91 ± 0.00 | 17.66               | 1,789  |
| AGRICULTURAL ECONOMICS & POLICY                  | 0.49 ± 0.05 | 0.99 ± 0.02 | 10.16               | 460    |
| AGRICULTURE, DAIRY & ANIMAL SCIENCE              | 1.36 ± 0.04 | 0.81 ± 0.01 | 14.95               | 2,656  |
| AGRICULTURE, MULTIDISCIPLINARY                   | 0.65 ± 0.03 | 0.94 ± 0.01 | 11.52               | 1,918  |
| AGRONOMY                                         | 1.58 ± 0.03 | 0.76 ± 0.00 | 14.13               | 3,094  |
| ALLERGY                                          | 1.92 ± 0.05 | 0.83 ± 0.01 | 22.90               | 831    |
| ANATOMY & MORPHOLOGY                             | 2.42 ± 0.07 | 0.62 ± 0.01 | 13.07               | 427    |
| ANDROLOGY                                        | 2.28 ± 0.07 | 0.70 ± 0.01 | 17.12               | 215    |
| ANESTHESIOLOGY                                   | 0.85 ± 0.03 | 0.98 ± 0.01 | 18.01               | 2,459  |
| ASTRONOMY & ASTROPHYSICS                         | 1.91 ± 0.01 | 0.88 ± 0.00 | 27.75               | 6,250  |
| AUTOMATION & CONTROL SYSTEMS                     | 0.29 ± 0.01 | 1.18 ± 0.01 | 14.66               | 1,600  |
| BEHAVIORAL SCIENCES                              | 3.00 ± 0.04 | 0.74 ± 0.00 | 25.85               | 2,977  |
| BIOCHEMICAL RESEARCH METHODS                     | 1.30 ± 0.05 | 0.94 ± 0.01 | 23.53               | 2,820  |
| BIOCHEMISTRY & MOLECULAR BIOLOGY                 | 2.84 ± 0.04 | 0.91 ± 0.00 | 47.52               | 25,535 |
| BIODIVERSITY CONSERVATION                        | 0.71 ± 0.04 | 0.95 ± 0.01 | 13.83               | 780    |
| BIOLOGY                                          | 0.69 ± 0.02 | 1.00 ± 0.01 | 16.65               | 3,933  |
| BIOPHYSICS                                       | 3.00 ± 0.08 | 0.80 ± 0.01 | 32.43               | 5,508  |
| BIOTECHNOLOGY & APPLIED MICROBIOLOGY             | 2.94 ± 0.03 | 0.75 ± 0.00 | 26.15               | 4,788  |
| CARDIAC & CARDIOVASCULAR SYSTEMS                 | 1.42 ± 0.02 | 0.96 ± 0.00 | 28.44               | 6,922  |
| CELL & TISSUE ENGINEERING                        | —           | —           | —                   | 0      |
| CELL BIOLOGY                                     | 3.00 ± 0.05 | 0.96 ± 0.00 | 58.12               | 10,030 |
| CHEMISTRY, ANALYTICAL                            | 1.55 ± 0.04 | 0.85 ± 0.01 | 19.68               | 6,050  |
| CHEMISTRY, APPLIED                               | 1.65 ± 0.04 | 0.79 ± 0.01 | 16.64               | 2,267  |
| CHEMISTRY, INORGANIC & NUCLEAR                   | 2.67 ± 0.03 | 0.70 ± 0.00 | 19.82               | 5,132  |
| CHEMISTRY, MEDICINAL                             | 1.92 ± 0.04 | 0.76 ± 0.00 | 17.47               | 3,137  |
| CHEMISTRY, MULTIDISCIPLINARY                     | 0.84 ± 0.02 | 1.03 ± 0.00 | 23.59               | 11,327 |
| CHEMISTRY, ORGANIC                               | 2.75 ± 0.04 | 0.71 ± 0.00 | 20.91               | 8,867  |
| CHEMISTRY, PHYSICAL                              | 1.49 ± 0.02 | 0.87 ± 0.00 | 21.32               | 11,078 |
| CLINICAL NEUROLOGY                               | 2.53 ± 0.03 | 0.84 ± 0.00 | 30.88               | 7,212  |
| COMPUTER SCIENCE, ARTIFICIAL INTELLIGENCE        | 0.91 ± 0.04 | 1.14 ± 0.01 | 40.84               | 715    |
| COMPUTER SCIENCE, CYBERNETICS                    | 0.45 ± 0.02 | 1.07 ± 0.01 | 13.50               | 276    |
| COMPUTER SCIENCE, HARDWARE & ARCHITECTURE        | 0.38 ± 0.02 | 1.11 ± 0.01 | 13.95               | 1,265  |
| COMPUTER SCIENCE, INFORMATION SYSTEMS            | 0.52 ± 0.03 | 1.02 ± 0.01 | 13.92               | 1,159  |
| COMPUTER SCIENCE, INTERDISCIPLINARY APPLICATIONS | 0.17 ± 0.01 | 1.25 ± 0.01 | 12.37               | 2,886  |
| COMPUTER SCIENCE, SOFTWARE ENGINEERING           | 0.28 ± 0.01 | 1.15 ± 0.01 | 12.48               | 1,947  |
| COMPUTER SCIENCE, THEORY & METHODS               | 0.42 ± 0.01 | 1.06 ± 0.01 | 12.77               | 1,901  |
| CONSTRUCTION & BUILDING TECHNOLOGY               | 0.89 ± 0.04 | 0.81 ± 0.01 | 9.23                | 708    |
| CRITICAL CARE MEDICINE                           | 1.18 ± 0.02 | 0.88 ± 0.00 | 17.11               | 1,346  |
| CRYSTALLOGRAPHY                                  | 0.91 ± 0.04 | 0.88 ± 0.01 | 17.16               | 3,867  |
| DENTISTRY, ORAL SURGERY & MEDICINE               | 1.07 ± 0.03 | 0.88 ± 0.01 | 15.25               | 3,248  |
| DERMATOLOGY                                      | 1.86 ± 0.04 | 0.77 ± 0.00 | 17.34               | 3,136  |
| DEVELOPMENTAL BIOLOGY                            | 6.29 ± 0.13 | 0.78 ± 0.01 | 60.35               | 1,355  |
| ECOLOGY                                          | 2.82 ± 0.03 | 0.81 ± 0.00 | 30.74               | 4,718  |
| EDUCATION, SCIENTIFIC DISCIPLINES                | 0.23 ± 0.02 | 1.05 ± 0.02 | 7.13                | 1,543  |
| ELECTROCHEMISTRY                                 | 2.12 ± 0.06 | 0.79 ± 0.01 | 22.53               | 2,351  |
| EMERGENCY MEDICINE                               | 1.06 ± 0.04 | 0.81 ± 0.01 | 12.02               | 602    |
| ENDOCRINOLOGY & METABOLISM                       | 3.61 ± 0.04 | 0.77 ± 0.00 | 33.46               | 6,836  |
| ENERGY & FUELS                                   | 0.31 ± 0.02 | 1.00 ± 0.01 | 6.96                | 3,018  |
| ENGINEERING, AEROSPACE                           | 0.27 ± 0.01 | 1.07 ± 0.01 | 7.98                | 1,522  |
| ENGINEERING, BIOMEDICAL                          | 1.11 ± 0.03 | 0.94 ± 0.01 | 19.52               | 1,759  |

Table S21: Publication year 1990.

| Subject-category                              | $a$         | $\alpha$    | $\langle c \rangle$ | $N$    |
|-----------------------------------------------|-------------|-------------|---------------------|--------|
| ENGINEERING, CHEMICAL                         | 0.67 ± 0.02 | 0.96 ± 0.01 | 12.97               | 6,807  |
| ENGINEERING, CIVIL                            | 0.45 ± 0.02 | 0.96 ± 0.01 | 8.42                | 2,998  |
| ENGINEERING, ELECTRICAL & ELECTRONIC          | 0.41 ± 0.01 | 1.10 ± 0.00 | 14.90               | 12,081 |
| ENGINEERING, ENVIRONMENTAL                    | 0.99 ± 0.05 | 0.98 ± 0.01 | 20.44               | 1,409  |
| ENGINEERING, GEOLOGICAL                       | 0.82 ± 0.03 | 0.96 ± 0.01 | 17.06               | 347    |
| ENGINEERING, INDUSTRIAL                       | 0.30 ± 0.01 | 1.05 ± 0.01 | 8.31                | 1,274  |
| ENGINEERING, MANUFACTURING                    | 0.44 ± 0.04 | 0.99 ± 0.02 | 9.73                | 599    |
| ENGINEERING, MARINE                           | 0.01 ± 0.01 | 1.25 ± 0.15 | 0.54                | 228    |
| ENGINEERING, MECHANICAL                       | 0.84 ± 0.01 | 0.86 ± 0.00 | 10.92               | 3,390  |
| ENGINEERING, MULTIDISCIPLINARY                | 0.17 ± 0.01 | 1.19 ± 0.01 | 8.50                | 2,603  |
| ENGINEERING, OCEAN                            | 0.61 ± 0.05 | 0.97 ± 0.02 | 12.11               | 263    |
| ENGINEERING, PETROLEUM                        | 0.03 ± 0.01 | 1.28 ± 0.07 | 1.55                | 854    |
| ENTOMOLOGY                                    | 1.73 ± 0.04 | 0.69 ± 0.00 | 11.90               | 3,128  |
| ENVIRONMENTAL SCIENCES                        | 1.23 ± 0.03 | 0.89 ± 0.01 | 17.87               | 6,779  |
| EVOLUTIONARY BIOLOGY                          | 2.03 ± 0.03 | 0.89 ± 0.00 | 30.87               | 1,419  |
| FISHERIES                                     | 2.93 ± 0.04 | 0.70 ± 0.00 | 21.47               | 1,599  |
| FOOD SCIENCE & TECHNOLOGY                     | 1.75 ± 0.03 | 0.79 ± 0.00 | 17.46               | 4,094  |
| FORESTRY                                      | 1.34 ± 0.04 | 0.84 ± 0.01 | 16.30               | 1,388  |
| GASTROENTEROLOGY & HEPATOLOGY                 | 1.87 ± 0.03 | 0.86 ± 0.00 | 25.14               | 4,356  |
| GENETICS & HEREDITY                           | 2.85 ± 0.05 | 0.86 ± 0.00 | 37.06               | 5,260  |
| GEOCHEMISTRY & GEOPHYSICS                     | 2.34 ± 0.03 | 0.84 ± 0.00 | 28.51               | 3,314  |
| GEOGRAPHY, PHYSICAL                           | 1.92 ± 0.06 | 0.78 ± 0.01 | 18.30               | 911    |
| GEOLOGY                                       | 3.62 ± 0.10 | 0.69 ± 0.01 | 25.70               | 729    |
| GEOSCIENCES, MULTIDISCIPLINARY                | 1.77 ± 0.02 | 0.81 ± 0.00 | 19.42               | 4,037  |
| GERIATRICS & GERONTOLOGY                      | 1.11 ± 0.03 | 0.95 ± 0.01 | 20.44               | 948    |
| HEALTH CARE SCIENCES & SERVICES               | 0.59 ± 0.01 | 0.99 ± 0.00 | 13.14               | 1,301  |
| HEMATOLOGY                                    | 2.66 ± 0.04 | 0.90 ± 0.00 | 41.52               | 4,716  |
| HISTORY & PHILOSOPHY OF SCIENCE               | 0.69 ± 0.05 | 0.79 ± 0.02 | 6.30                | 533    |
| IMAGING SCIENCE & PHOTOGRAPHIC TECHNOLOGY     | 0.91 ± 0.04 | 1.05 ± 0.01 | 25.71               | 438    |
| IMMUNOLOGY                                    | 2.64 ± 0.03 | 0.86 ± 0.00 | 34.43               | 11,079 |
| INFECTIOUS DISEASES                           | 2.73 ± 0.05 | 0.78 ± 0.00 | 27.13               | 3,629  |
| INSTRUMENTS & INSTRUMENTATION                 | 0.57 ± 0.02 | 0.94 ± 0.01 | 10.51               | 5,576  |
| INTEGRATIVE & COMPLEMENTARY MEDICINE          | 1.03 ± 0.06 | 0.77 ± 0.02 | 9.42                | 213    |
| LIMNOLOGY                                     | 5.59 ± 0.11 | 0.71 ± 0.01 | 42.90               | 563    |
| MARINE & FRESHWATER BIOLOGY                   | 4.17 ± 0.07 | 0.65 ± 0.00 | 25.14               | 3,728  |
| MATERIALS SCIENCE, BIOMATERIALS               | 2.11 ± 0.06 | 0.87 ± 0.01 | 29.18               | 267    |
| MATERIALS SCIENCE, CERAMICS                   | 1.51 ± 0.02 | 0.91 ± 0.00 | 25.46               | 1,420  |
| MATERIALS SCIENCE, CHARACTERIZATION & TESTING | 0.39 ± 0.03 | 0.84 ± 0.01 | 4.44                | 429    |
| MATERIALS SCIENCE, COATINGS & FILMS           | 1.62 ± 0.06 | 0.84 ± 0.01 | 20.12               | 1,605  |
| MATERIALS SCIENCE, COMPOSITES                 | 0.61 ± 0.07 | 0.97 ± 0.03 | 12.12               | 419    |
| MATERIALS SCIENCE, MULTIDISCIPLINARY          | 0.85 ± 0.01 | 0.91 ± 0.00 | 13.33               | 11,074 |
| MATERIALS SCIENCE, PAPER & WOOD               | 0.33 ± 0.03 | 0.95 ± 0.02 | 6.01                | 1,071  |
| MATERIALS SCIENCE, TEXTILES                   | 0.74 ± 0.04 | 0.76 ± 0.01 | 6.51                | 348    |
| MATHEMATICAL & COMPUTATIONAL BIOLOGY          | 0.89 ± 0.04 | 1.02 ± 0.01 | 23.79               | 954    |
| MATHEMATICS                                   | 0.36 ± 0.01 | 0.99 ± 0.00 | 7.59                | 9,160  |
| MATHEMATICS, APPLIED                          | 0.42 ± 0.00 | 1.03 ± 0.00 | 10.86               | 5,492  |
| MATHEMATICS, INTERDISCIPLINARY APPLICATIONS   | 0.59 ± 0.03 | 1.09 ± 0.01 | 20.25               | 1,688  |
| MECHANICS                                     | 0.80 ± 0.02 | 0.96 ± 0.01 | 15.11               | 4,460  |
| MEDICAL ETHICS                                | 0.13 ± 0.02 | 1.06 ± 0.03 | 3.98                | 175    |
| MEDICAL INFORMATICS                           | 0.69 ± 0.03 | 1.01 ± 0.01 | 17.24               | 474    |

Table S22: Publication year 1990.

| Subject-category                              | $a$         | $\alpha$    | $\langle c \rangle$ | $N$    |
|-----------------------------------------------|-------------|-------------|---------------------|--------|
| MEDICAL LABORATORY TECHNOLOGY                 | 1.28 ± 0.04 | 0.81 ± 0.01 | 13.83               | 1,786  |
| MEDICINE, GENERAL & INTERNAL                  | 0.21 ± 0.01 | 1.37 ± 0.01 | 23.42               | 15,069 |
| MEDICINE, LEGAL                               | 0.88 ± 0.04 | 0.78 ± 0.01 | 8.75                | 573    |
| MEDICINE, RESEARCH & EXPERIMENTAL             | 0.89 ± 0.03 | 1.11 ± 0.01 | 31.36               | 5,578  |
| METALLURGY & METALLURGICAL ENGINEERING        | 0.35 ± 0.02 | 1.00 ± 0.01 | 7.77                | 1,652  |
| METEOROLOGY & ATMOSPHERIC SCIENCES            | 1.55 ± 0.02 | 0.91 ± 0.00 | 24.77               | 2,618  |
| MICROBIOLOGY                                  | 2.91 ± 0.04 | 0.79 ± 0.00 | 30.40               | 7,428  |
| MICROSCOPY                                    | 1.49 ± 0.07 | 0.75 ± 0.01 | 12.76               | 275    |
| MINERALOGY                                    | 2.98 ± 0.08 | 0.74 ± 0.01 | 25.73               | 924    |
| MINING & MINERAL PROCESSING                   | 0.58 ± 0.05 | 0.87 ± 0.02 | 7.95                | 751    |
| MULTIDISCIPLINARY SCIENCES                    | 0.96 ± 0.05 | 1.26 ± 0.01 | 67.17               | 11,404 |
| MYCOLOGY                                      | 1.14 ± 0.07 | 0.82 ± 0.02 | 13.20               | 500    |
| NANOSCIENCE & NANOTECHNOLOGY                  | 1.66 ± 0.05 | 0.80 ± 0.01 | 17.74               | 689    |
| NEUROIMAGING                                  | 2.81 ± 0.07 | 0.75 ± 0.01 | 25.47               | 487    |
| NEUROSCIENCES                                 | 3.49 ± 0.04 | 0.82 ± 0.00 | 39.73               | 13,815 |
| NUCLEAR SCIENCE & TECHNOLOGY                  | 0.67 ± 0.01 | 0.87 ± 0.00 | 8.92                | 5,555  |
| NURSING                                       | 0.57 ± 0.05 | 0.92 ± 0.02 | 9.46                | 1,007  |
| NUTRITION & DIETETICS                         | 1.70 ± 0.03 | 0.84 ± 0.00 | 20.81               | 2,929  |
| OBSTETRICS & GYNECOLOGY                       | 1.62 ± 0.03 | 0.82 ± 0.00 | 18.52               | 4,618  |
| OCEANOGRAPHY                                  | 3.78 ± 0.09 | 0.72 ± 0.01 | 29.91               | 1,969  |
| ONCOLOGY                                      | 2.82 ± 0.02 | 0.82 ± 0.00 | 33.14               | 9,443  |
| OPERATIONS RESEARCH & MANAGEMENT SCIENCE      | 0.70 ± 0.02 | 1.02 ± 0.01 | 16.99               | 2,047  |
| OPHTHALMOLOGY                                 | 1.83 ± 0.03 | 0.79 ± 0.00 | 18.29               | 3,787  |
| OPTICS                                        | 1.43 ± 0.03 | 0.86 ± 0.00 | 18.98               | 6,966  |
| ORNITHOLOGY                                   | 2.48 ± 0.05 | 0.69 ± 0.01 | 17.14               | 526    |
| ORTHOPEDICS                                   | 1.68 ± 0.02 | 0.88 ± 0.00 | 24.54               | 2,732  |
| OTORHINOLARYNGOLOGY                           | 1.73 ± 0.03 | 0.78 ± 0.00 | 16.80               | 2,259  |
| PALEONTOLOGY                                  | 2.00 ± 0.08 | 0.76 ± 0.01 | 17.83               | 589    |
| PARASITOLOGY                                  | 2.81 ± 0.09 | 0.64 ± 0.01 | 16.24               | 1,417  |
| PATHOLOGY                                     | 1.95 ± 0.03 | 0.85 ± 0.00 | 24.83               | 4,187  |
| PEDIATRICS                                    | 1.42 ± 0.03 | 0.84 ± 0.00 | 17.65               | 5,337  |
| PERIPHERAL VASCULAR DISEASE                   | 2.47 ± 0.03 | 0.91 ± 0.00 | 39.77               | 3,608  |
| PHARMACOLOGY & PHARMACY                       | 1.83 ± 0.02 | 0.82 ± 0.00 | 21.25               | 15,634 |
| PHYSICS, APPLIED                              | 1.10 ± 0.02 | 0.90 ± 0.00 | 17.50               | 12,359 |
| PHYSICS, ATOMIC, MOLECULAR & CHEMICAL         | 2.12 ± 0.04 | 0.84 ± 0.00 | 26.35               | 8,269  |
| PHYSICS, CONDENSED MATTER                     | 1.15 ± 0.02 | 0.94 ± 0.00 | 21.94               | 10,973 |
| PHYSICS, FLUIDS & PLASMAS                     | 1.60 ± 0.06 | 0.87 ± 0.01 | 21.79               | 1,175  |
| PHYSICS, MATHEMATICAL                         | 0.64 ± 0.02 | 1.04 ± 0.01 | 17.44               | 1,994  |
| PHYSICS, MULTIDISCIPLINARY                    | 0.69 ± 0.02 | 1.12 ± 0.01 | 27.12               | 9,178  |
| PHYSICS, NUCLEAR                              | 1.07 ± 0.03 | 0.89 ± 0.01 | 15.38               | 3,315  |
| PHYSICS, PARTICLES & FIELDS                   | 0.70 ± 0.02 | 1.07 ± 0.01 | 21.20               | 4,037  |
| PHYSIOLOGY                                    | 4.19 ± 0.04 | 0.73 ± 0.00 | 33.84               | 5,969  |
| PLANT SCIENCES                                | 2.00 ± 0.03 | 0.79 ± 0.00 | 20.37               | 10,016 |
| POLYMER SCIENCE                               | 1.84 ± 0.03 | 0.84 ± 0.00 | 22.22               | 4,380  |
| PRIMARY HEALTH CARE                           | 0.16 ± 0.02 | 1.09 ± 0.02 | 5.04                | 1,113  |
| PSYCHIATRY                                    | 2.13 ± 0.04 | 0.89 ± 0.00 | 31.09               | 5,029  |
| PSYCHOLOGY                                    | 2.52 ± 0.04 | 0.90 ± 0.00 | 41.47               | 1,600  |
| PUBLIC, ENVIRONMENTAL & OCCUPATIONAL HEALTH   | 1.53 ± 0.02 | 0.88 ± 0.00 | 21.55               | 5,378  |
| RADIOLOGY, NUCLEAR MEDICINE & MEDICAL IMAGING | 1.26 ± 0.02 | 0.92 ± 0.00 | 21.15               | 7,596  |
| REHABILITATION                                | 1.00 ± 0.08 | 0.90 ± 0.02 | 15.53               | 498    |

Table S23: Publication year 1990.

| Subject-category                    | $a$                               | $\alpha$                          | $\langle c \rangle$ | $N$            |
|-------------------------------------|-----------------------------------|-----------------------------------|---------------------|----------------|
| REMOTE SENSING                      | $1.15 \pm 0.05$                   | $0.97 \pm 0.01$                   | 23.61               | 649            |
| REPRODUCTIVE BIOLOGY                | $2.66 \pm 0.07$                   | $0.74 \pm 0.01$                   | 22.08               | 1,917          |
| RESPIRATORY SYSTEM                  | $1.37 \pm 0.03$                   | $0.87 \pm 0.00$                   | 18.57               | 3,254          |
| RHEUMATOLOGY                        | $1.37 \pm 0.04$                   | $0.95 \pm 0.01$                   | 28.78               | 1,462          |
| ROBOTICS                            | $0.17 \pm 0.01$                   | $1.30 \pm 0.01$                   | 17.19               | 149            |
| SOIL SCIENCE                        | $2.17 \pm 0.03$                   | $0.77 \pm 0.00$                   | 20.33               | 1,939          |
| SPECTROSCOPY                        | $0.92 \pm 0.05$                   | $0.92 \pm 0.01$                   | 15.34               | 3,760          |
| SPORT SCIENCES                      | $2.45 \pm 0.03$                   | $0.78 \pm 0.00$                   | 24.00               | 2,036          |
| STATISTICS & PROBABILITY            | $0.44 \pm 0.02$                   | $1.12 \pm 0.01$                   | 17.96               | 2,916          |
| SUBSTANCE ABUSE                     | $3.56 \pm 0.13$                   | $0.72 \pm 0.01$                   | 28.48               | 454            |
| SURGERY                             | $1.64 \pm 0.02$                   | $0.86 \pm 0.00$                   | 21.64               | 12,412         |
| TELECOMMUNICATIONS                  | $0.21 \pm 0.00$                   | $1.24 \pm 0.00$                   | 14.11               | 1,739          |
| THERMODYNAMICS                      | $0.82 \pm 0.01$                   | $0.88 \pm 0.00$                   | 11.37               | 2,175          |
| TOXICOLOGY                          | $2.19 \pm 0.03$                   | $0.73 \pm 0.00$                   | 17.76               | 3,532          |
| TRANSPLANTATION                     | $1.29 \pm 0.04$                   | $0.84 \pm 0.01$                   | 15.43               | 2,401          |
| TRANSPORTATION SCIENCE & TECHNOLOGY | $0.10 \pm 0.01$                   | $1.36 \pm 0.02$                   | 9.51                | 379            |
| TROPICAL MEDICINE                   | $1.45 \pm 0.08$                   | $0.76 \pm 0.01$                   | 12.84               | 1,072          |
| UROLOGY & NEPHROLOGY                | $1.33 \pm 0.02$                   | $0.89 \pm 0.00$                   | 20.06               | 3,403          |
| VETERINARY SCIENCES                 | $1.42 \pm 0.04$                   | $0.74 \pm 0.01$                   | 11.75               | 5,079          |
| VIROLOGY                            | $6.11 \pm 0.07$                   | $0.67 \pm 0.00$                   | 40.24               | 2,836          |
| WATER RESOURCES                     | $1.27 \pm 0.04$                   | $0.89 \pm 0.01$                   | 18.20               | 2,366          |
| ZOOLOGY                             | $1.77 \pm 0.03$                   | $0.84 \pm 0.00$                   | 22.57               | 4,615          |
| <b>TOTAL</b>                        | <b><math>1.00 \pm 0.00</math></b> | <b><math>1.00 \pm 0.00</math></b> | <b>24.16</b>        | <b>619,430</b> |

Table S24: Publication year 1990.

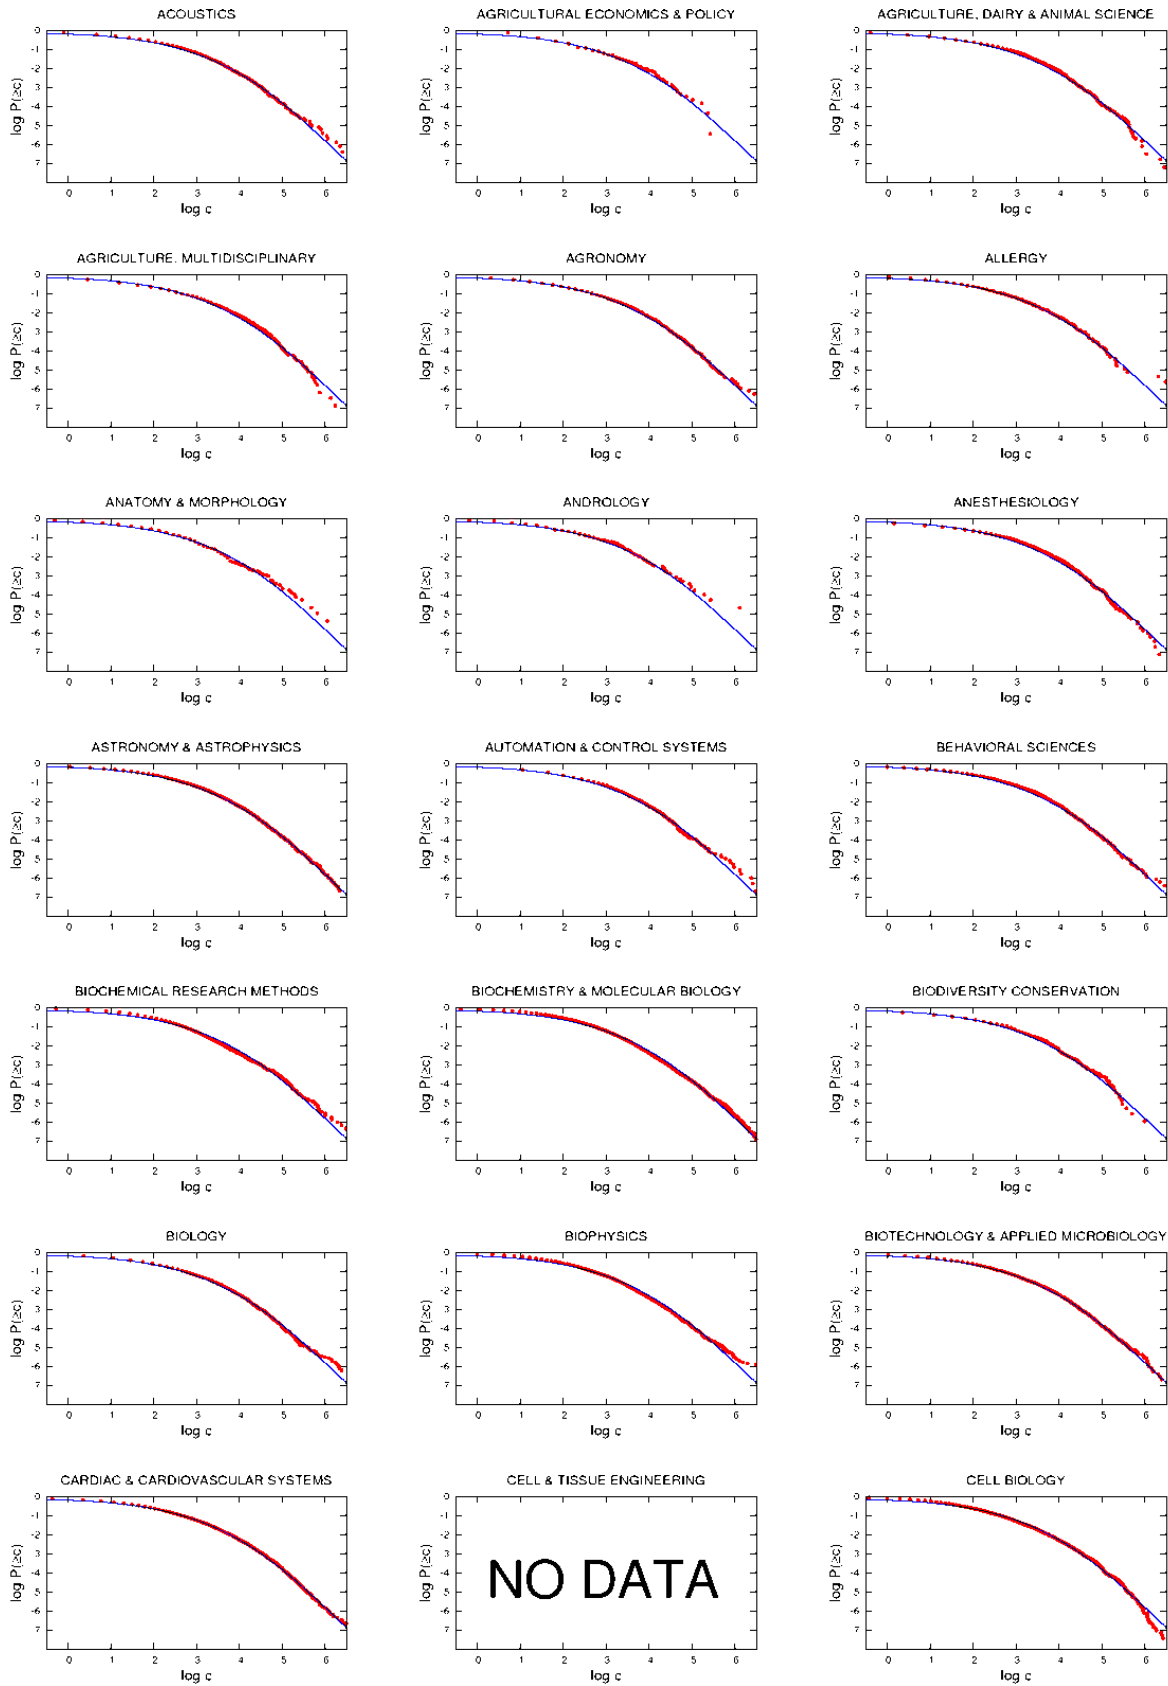

Figure S48: Publication year 1990.

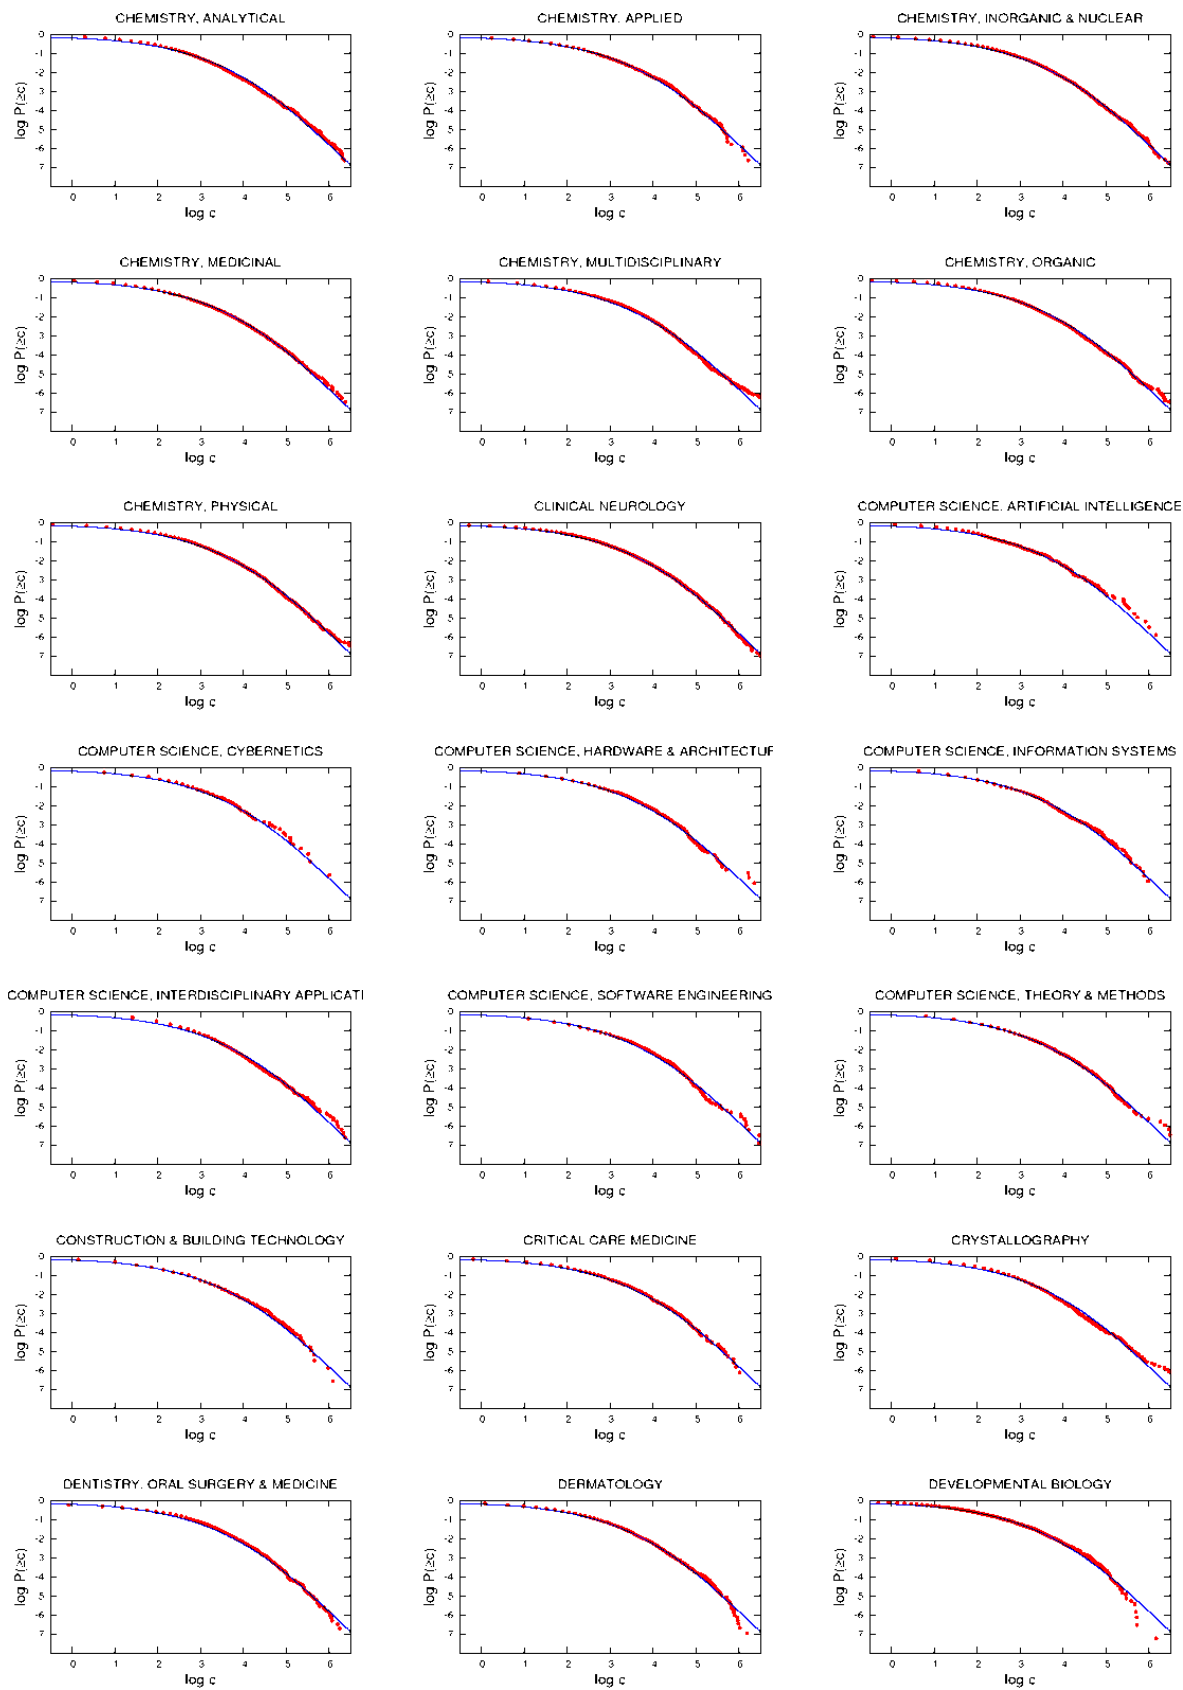

Figure S49: Publication year 1990.

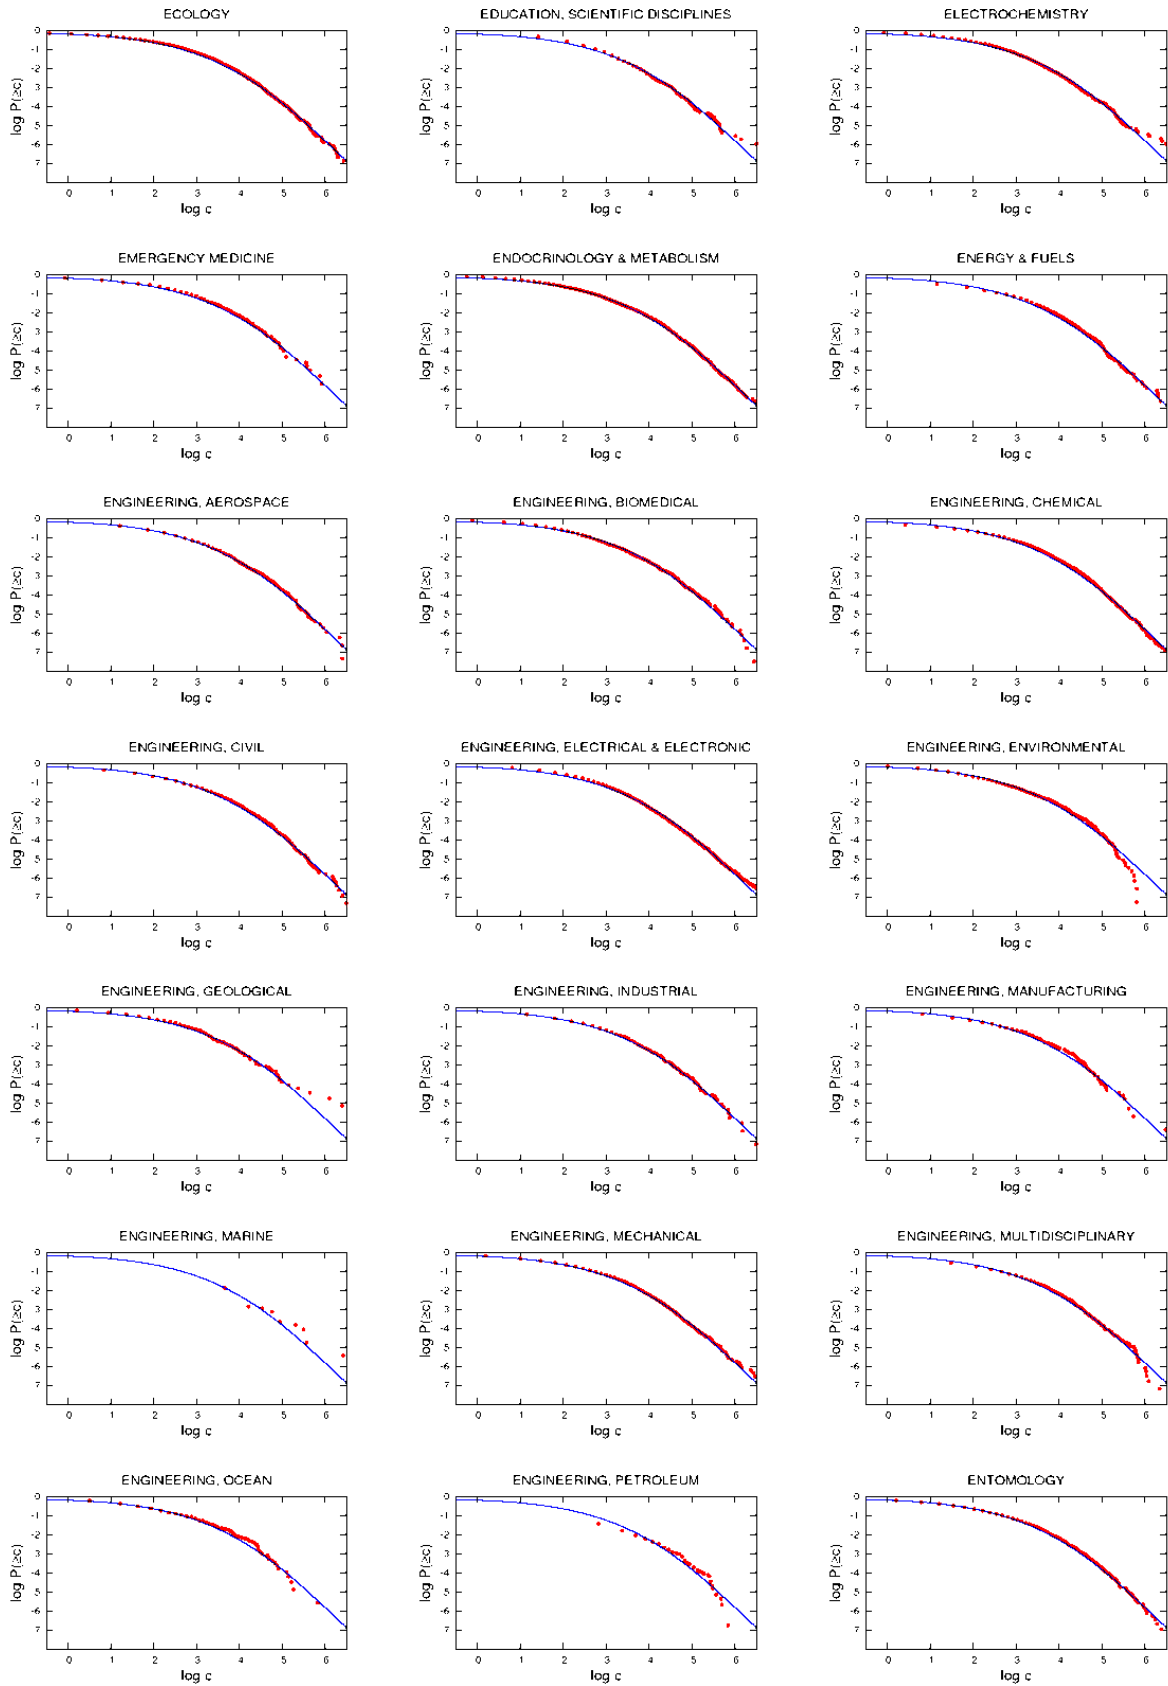

Figure S50: Publication year 1990.



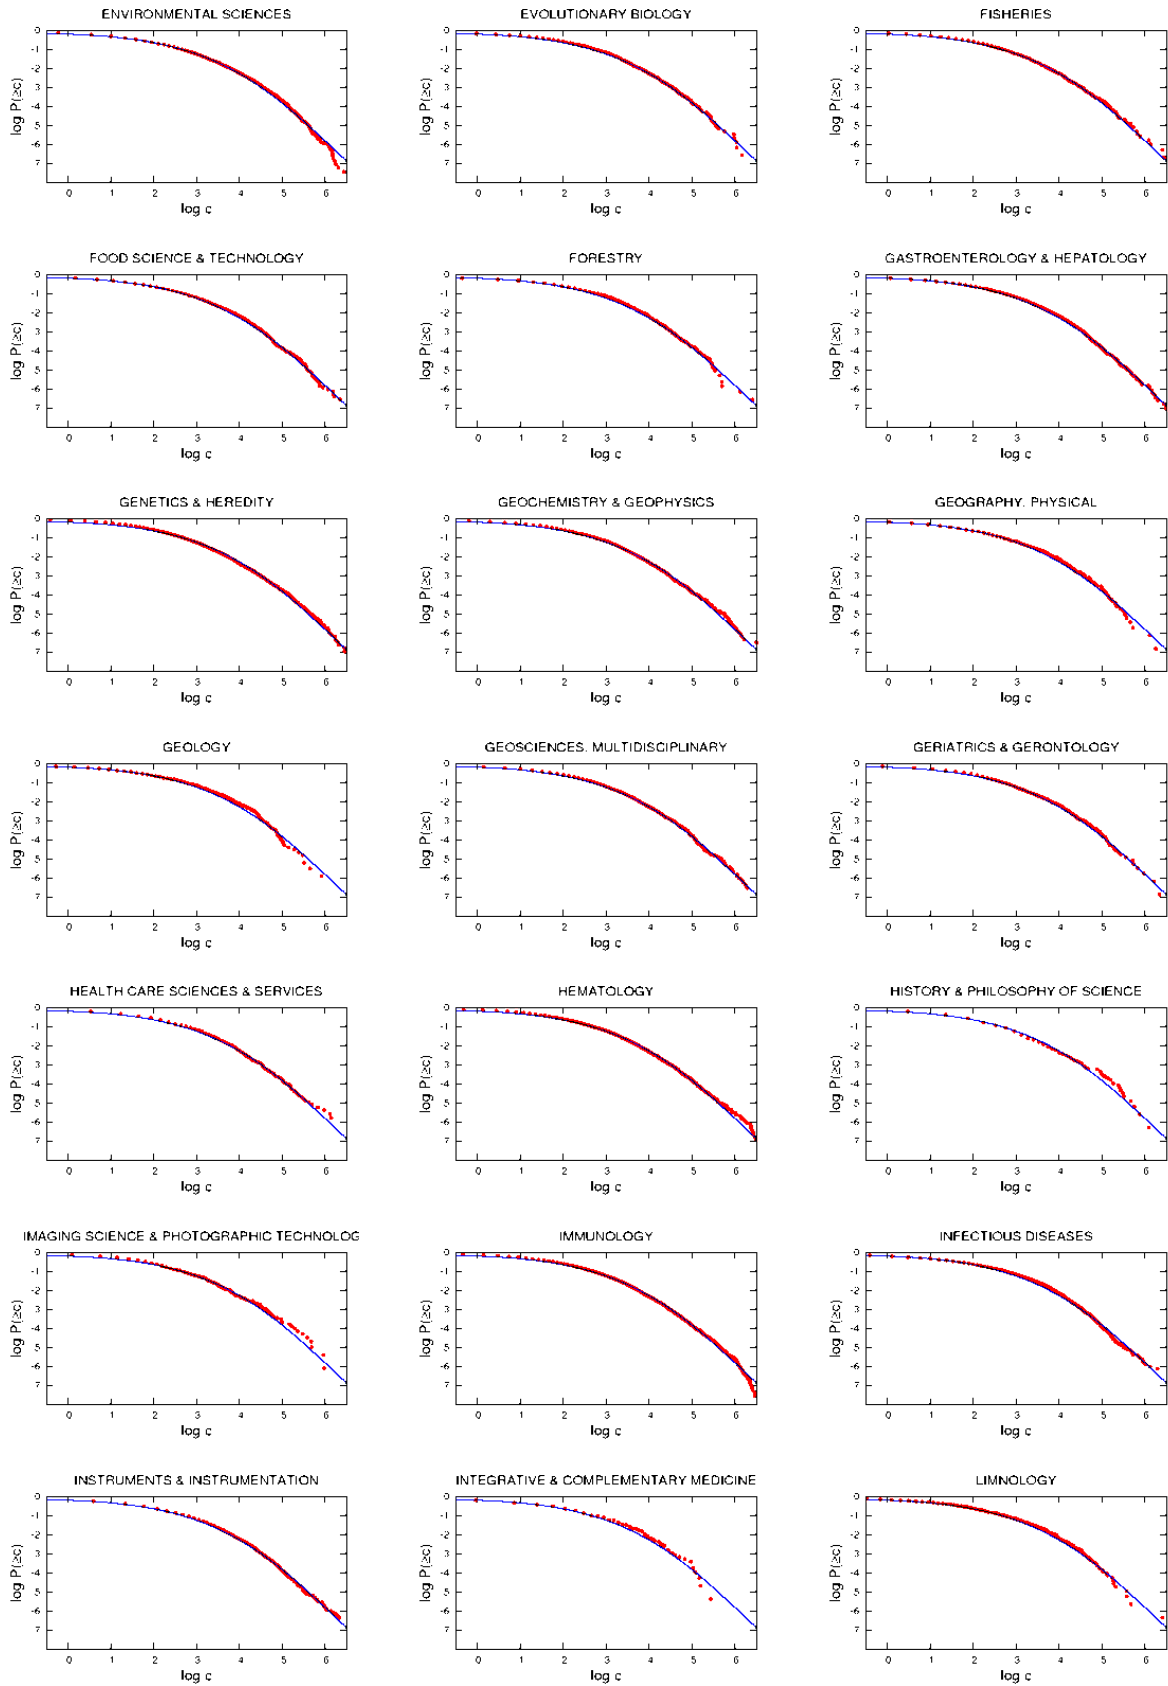

Figure S51: Publication year 1990.

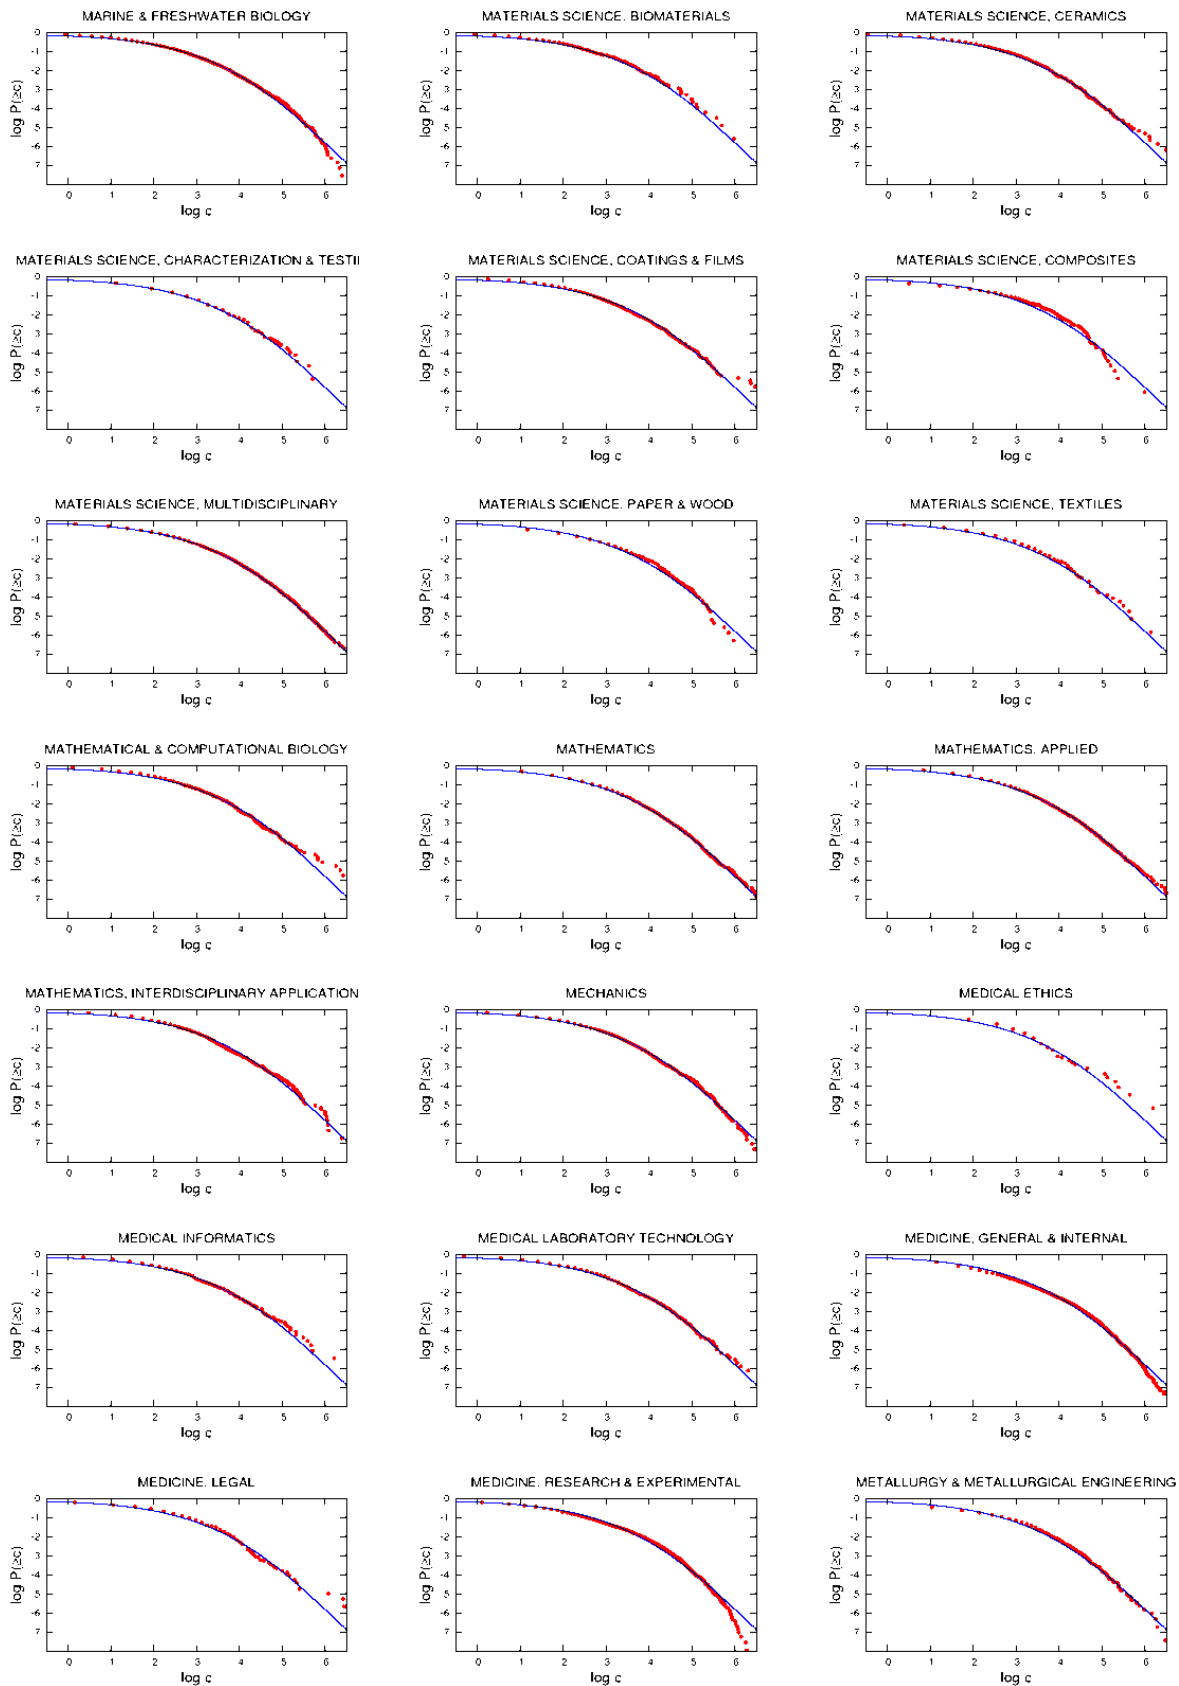

Figure S52: Publication year 1990.

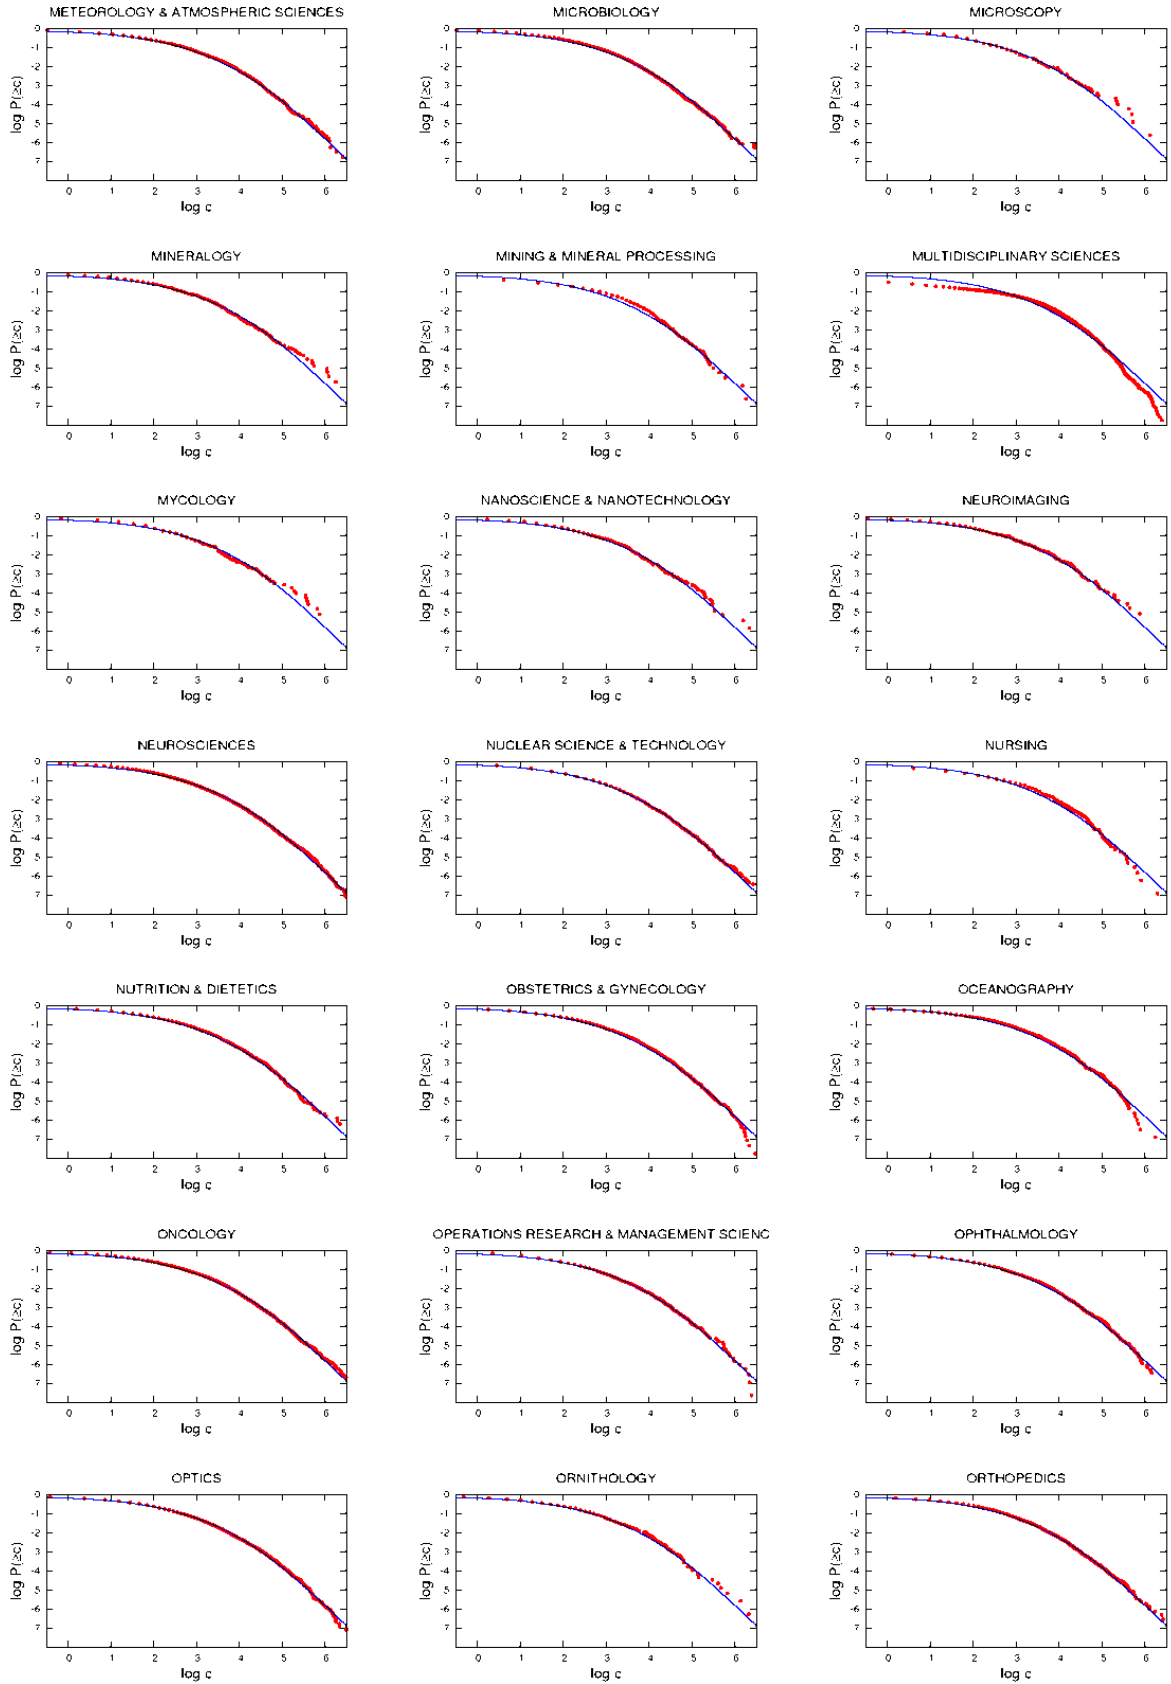

Figure S53: Publication year 1990.

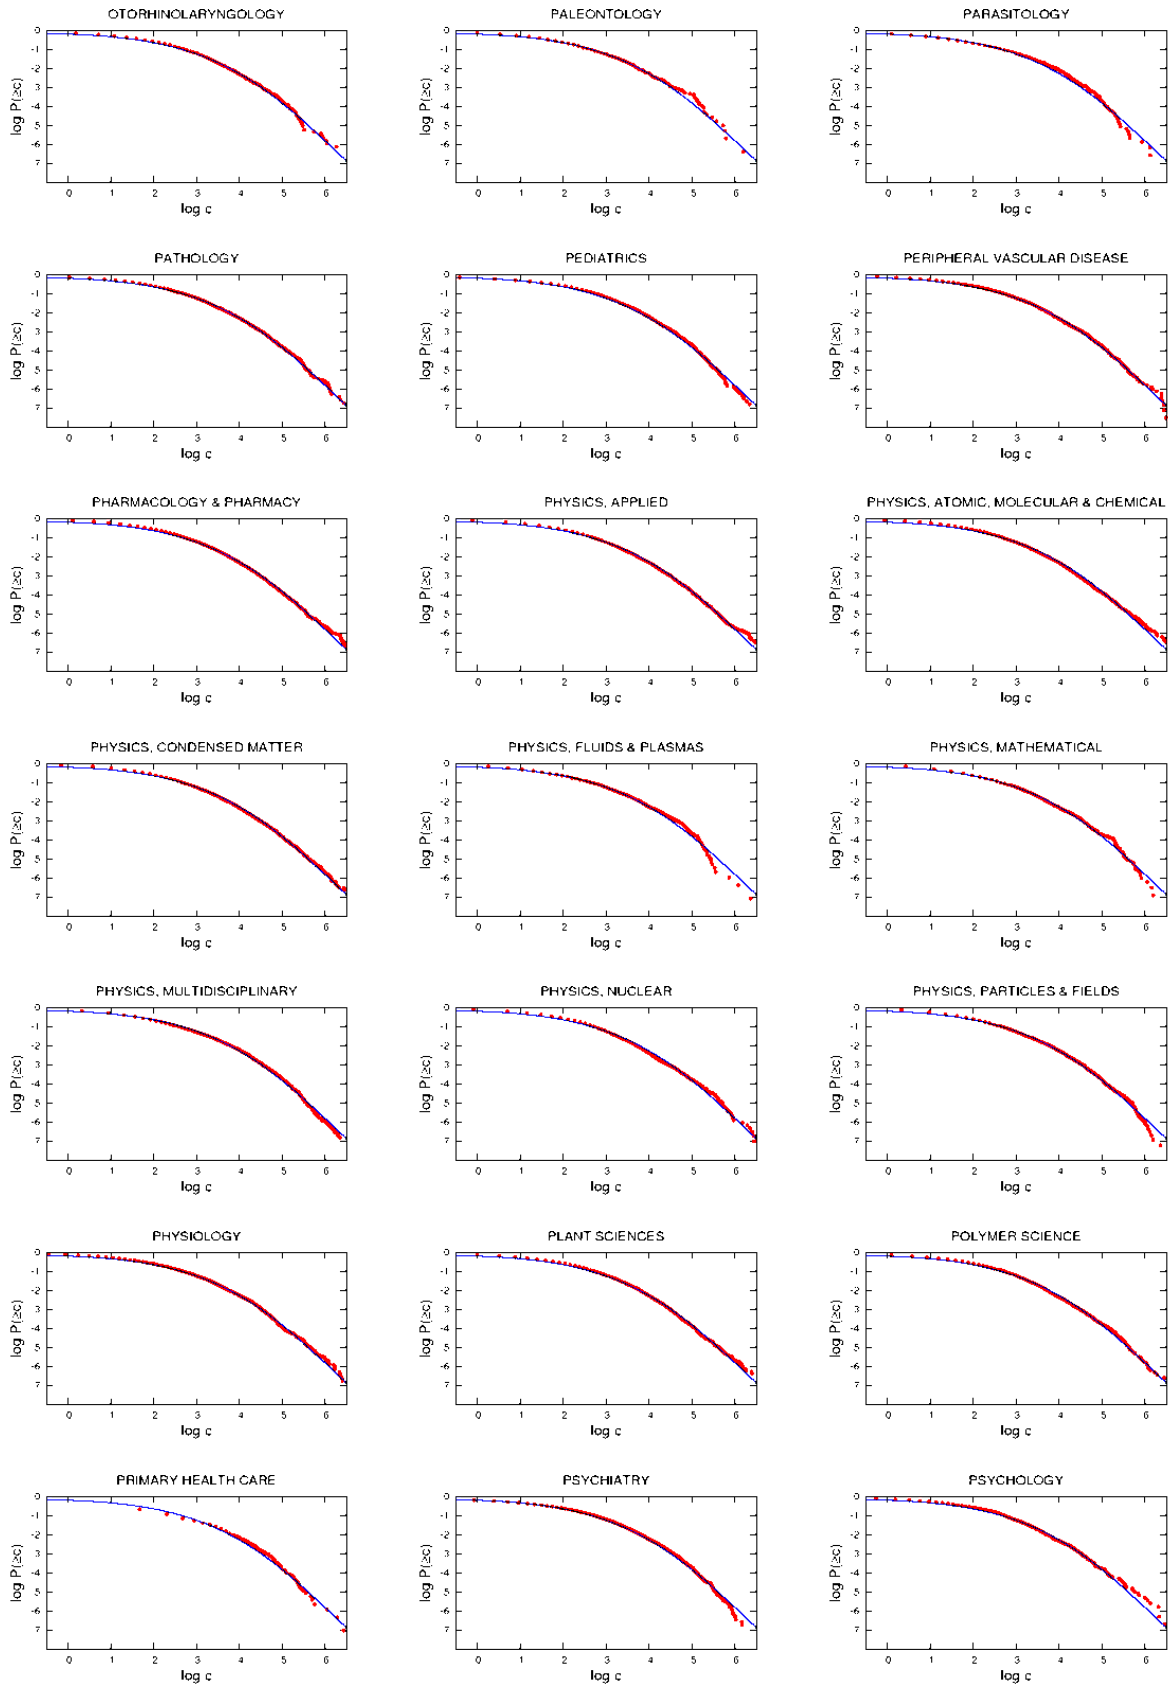

Figure S54: Publication year 1990.

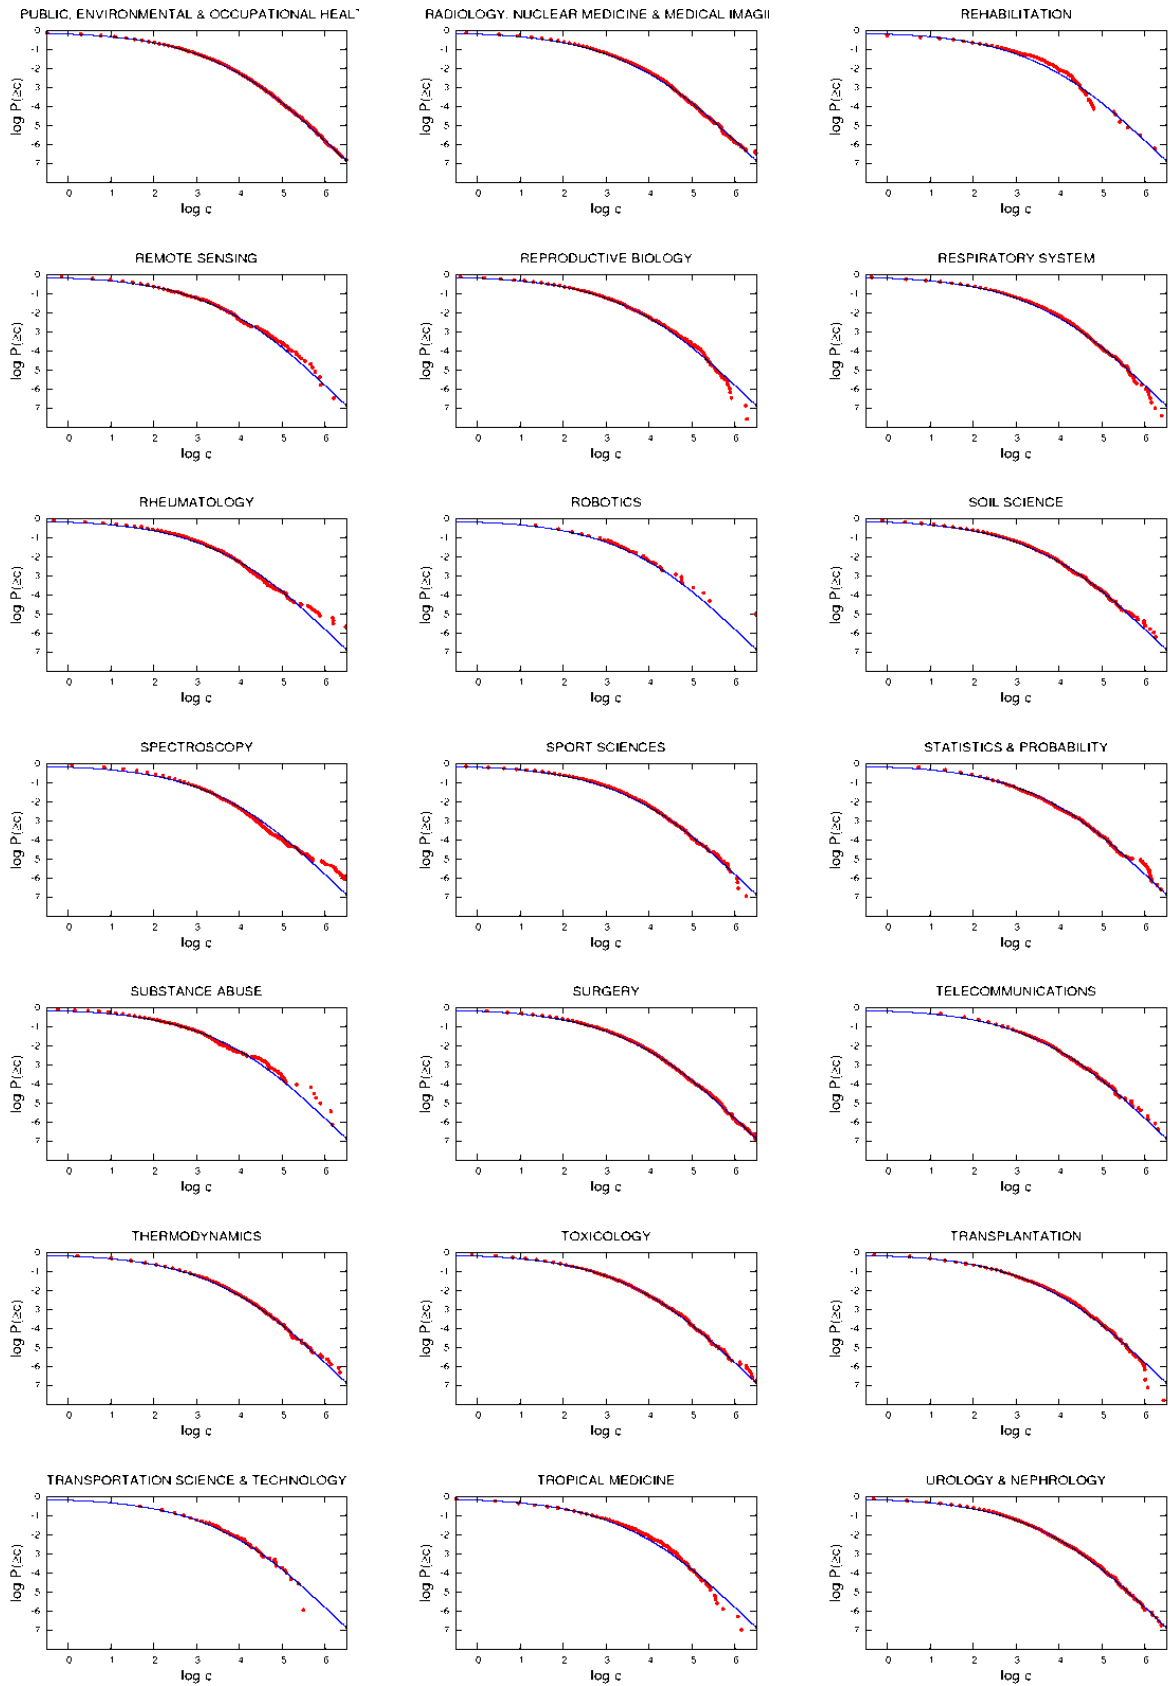

Figure S55: Publication year 1990.

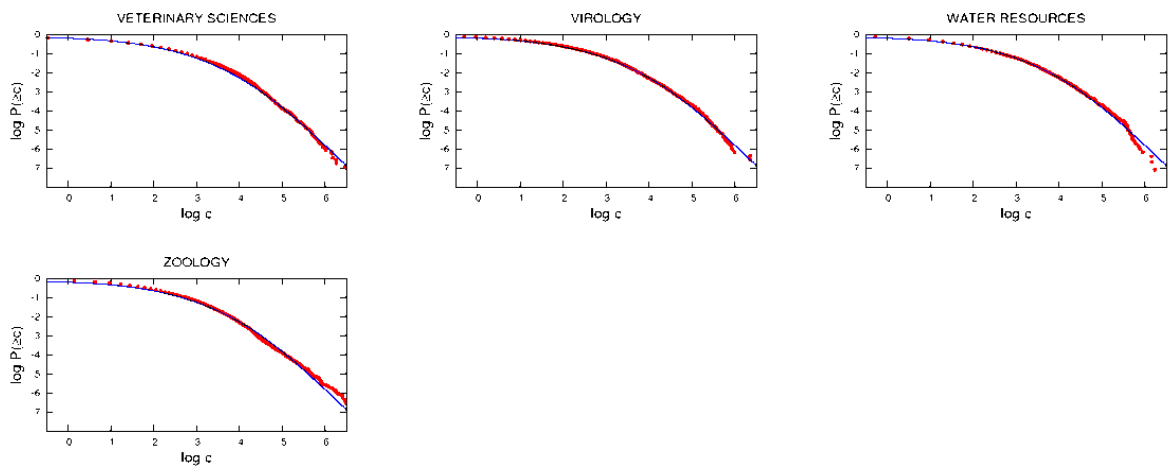

Figure S56: Publication year 1990.

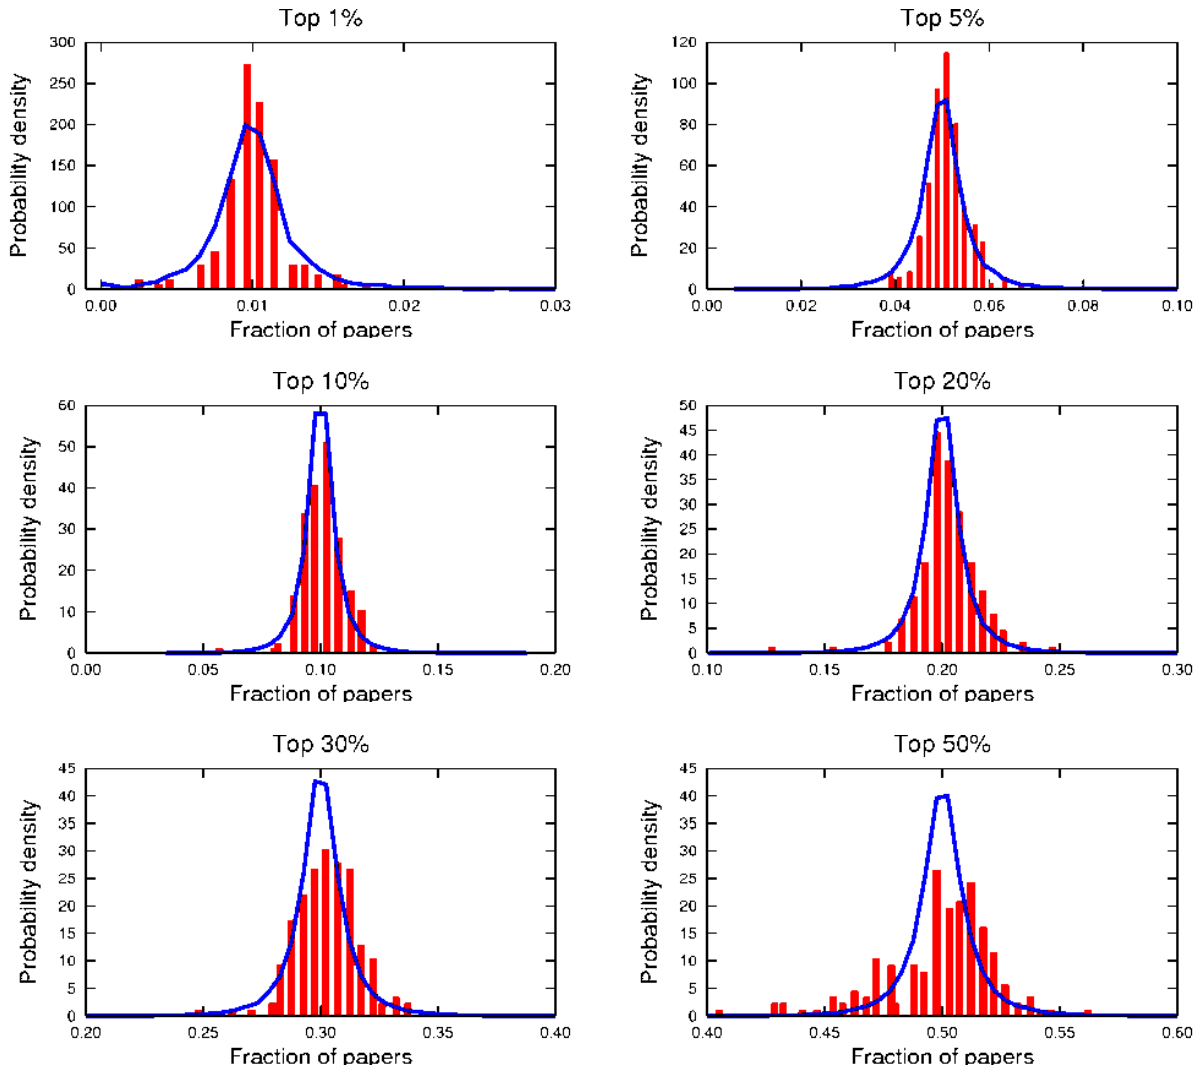

Figure S57: Publication year 1990.
