# Supplementary material for: A Reverse Engineering Approach to the Suppression of Citation Biases Reveals Universal Properties of Citation Distributions
Source: PubMed Central journal article supplement (PMC3315498; doi:10.1371/journal.pone.0033833), 2012-03-29
Supplement: pone.0033833.s005.pdf [file pone.0033833.s005.pdf]

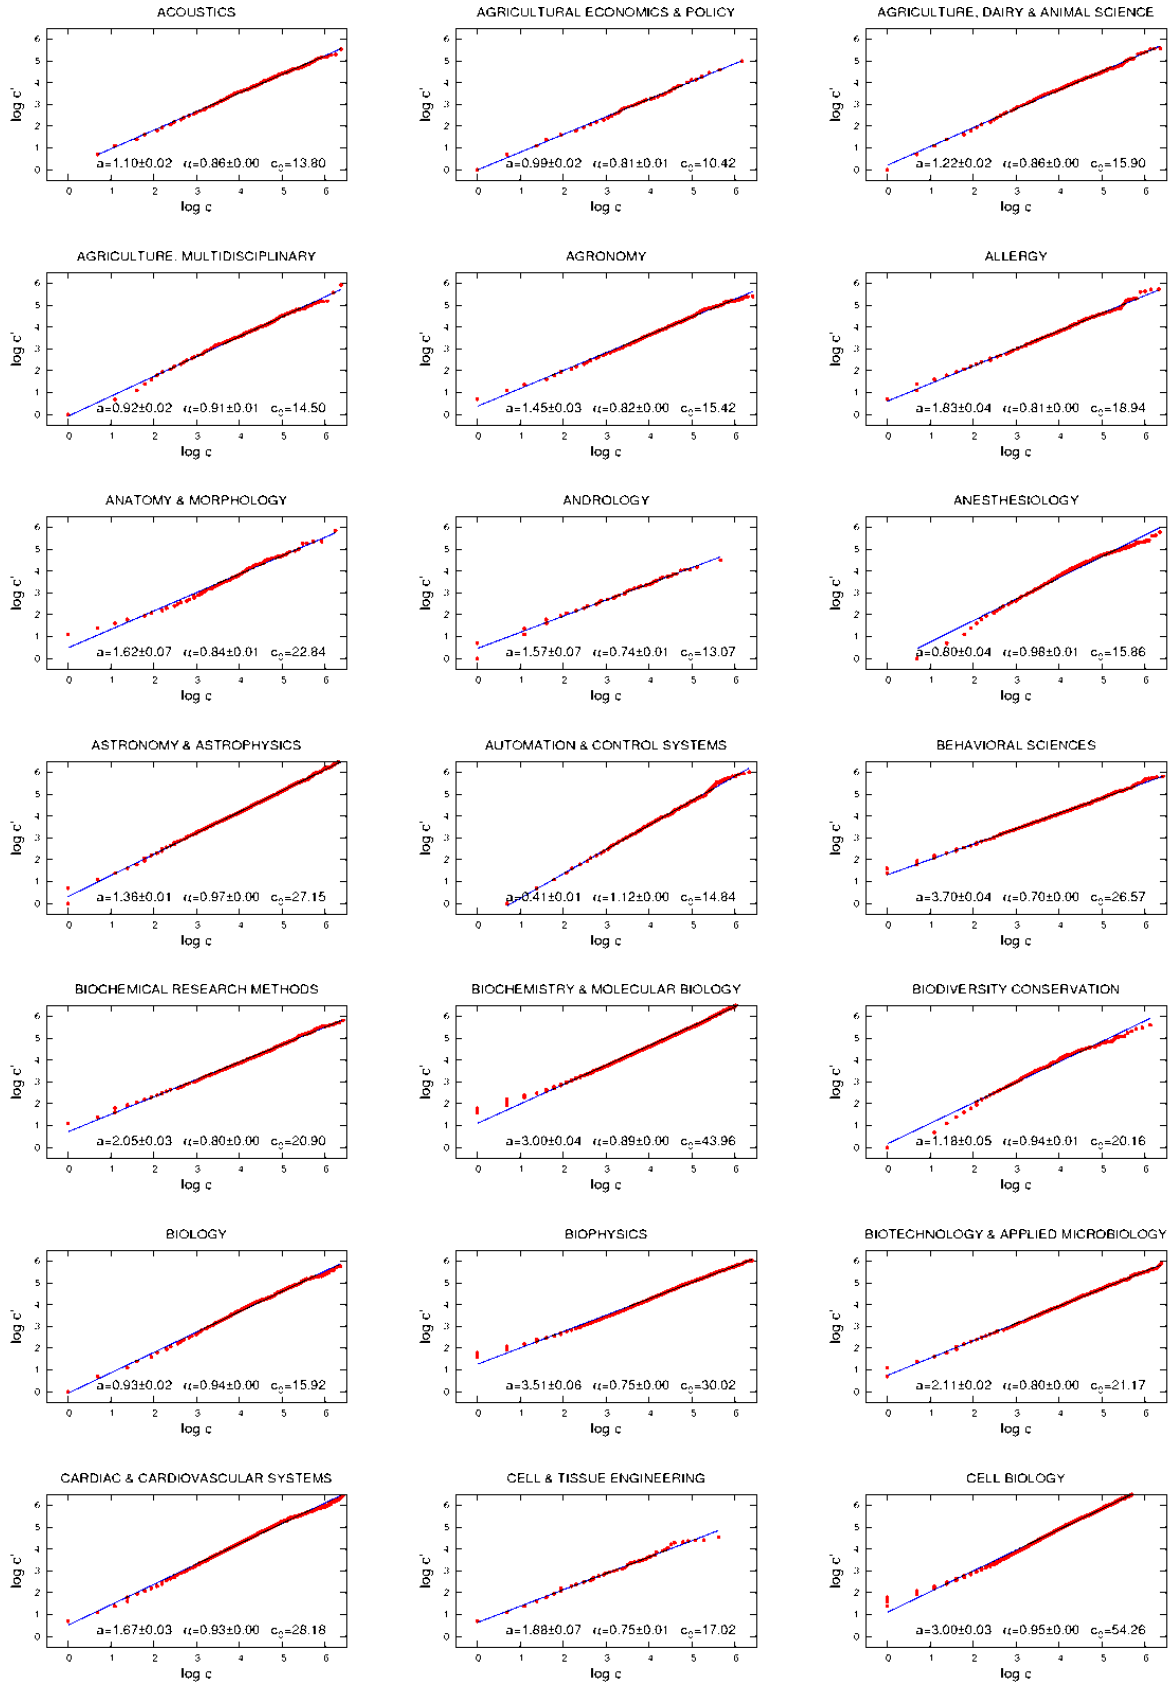

Figure S58: Publication year 1995.

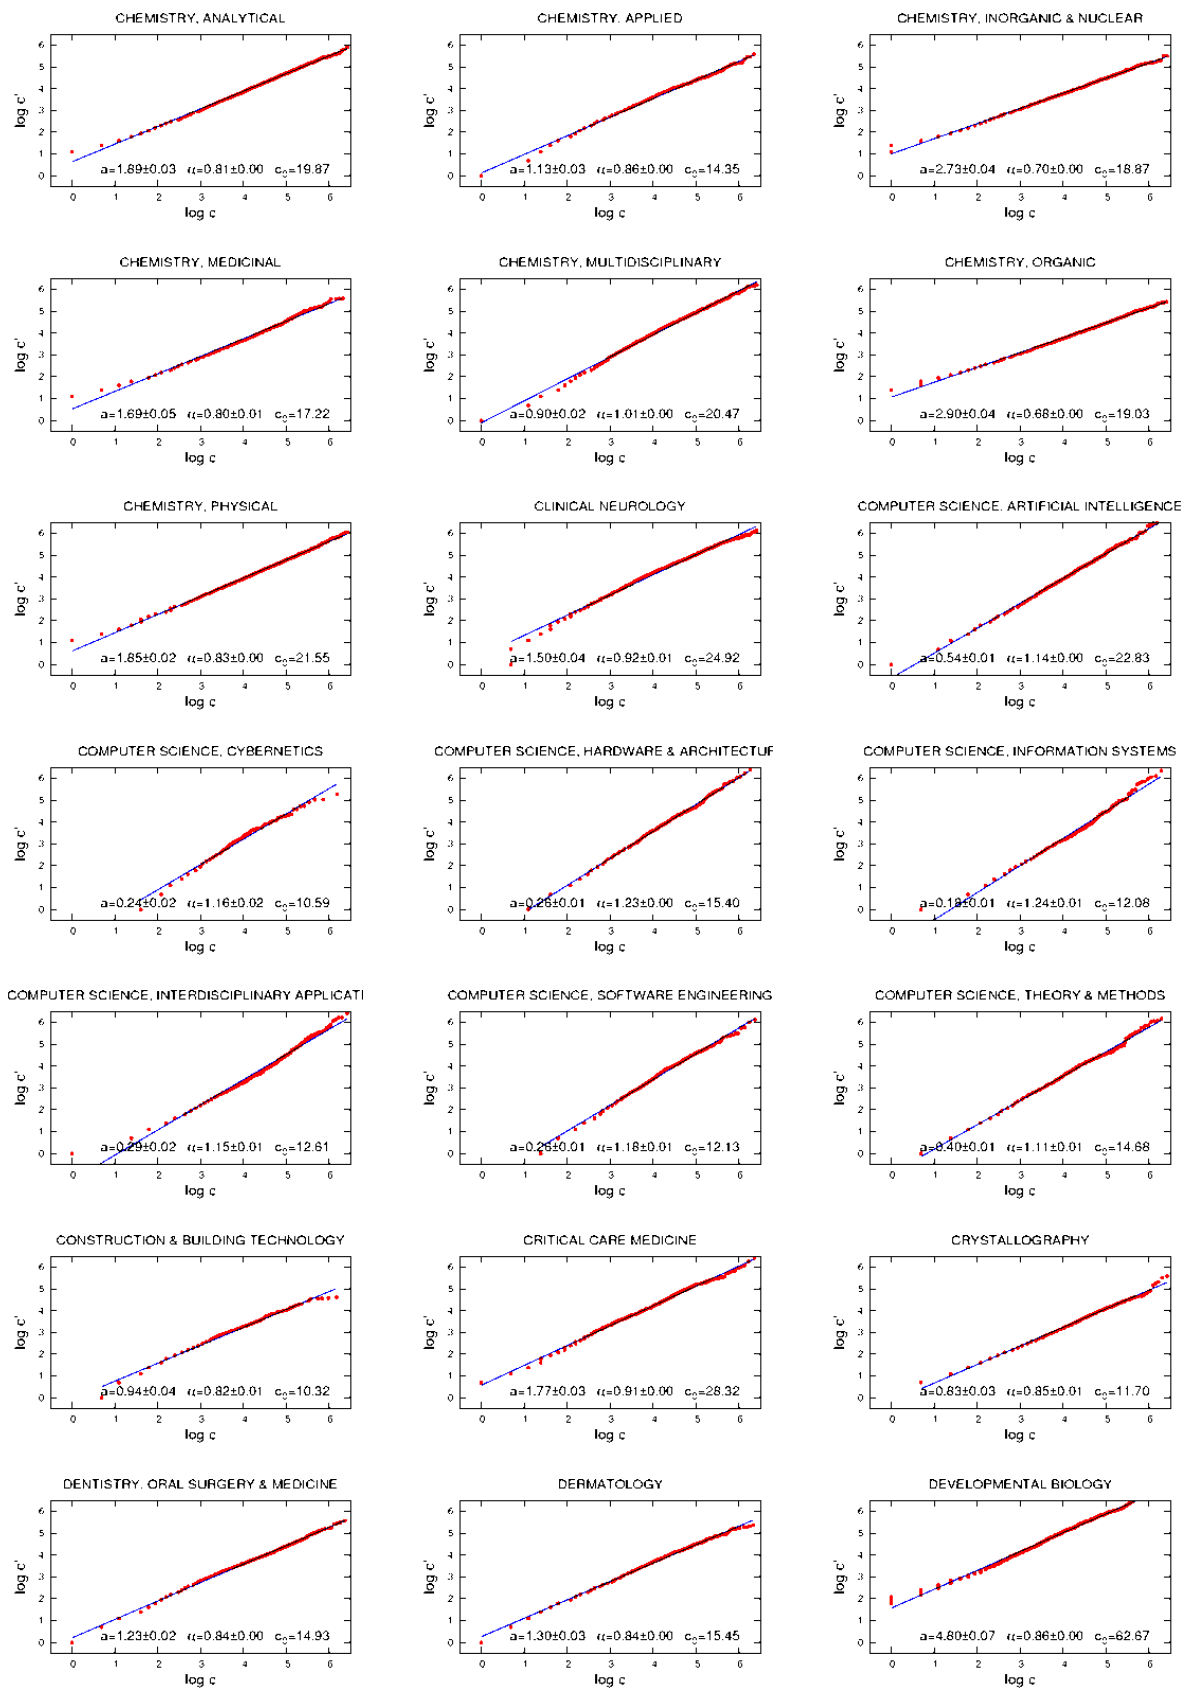

Figure S59: Publication year 1995.

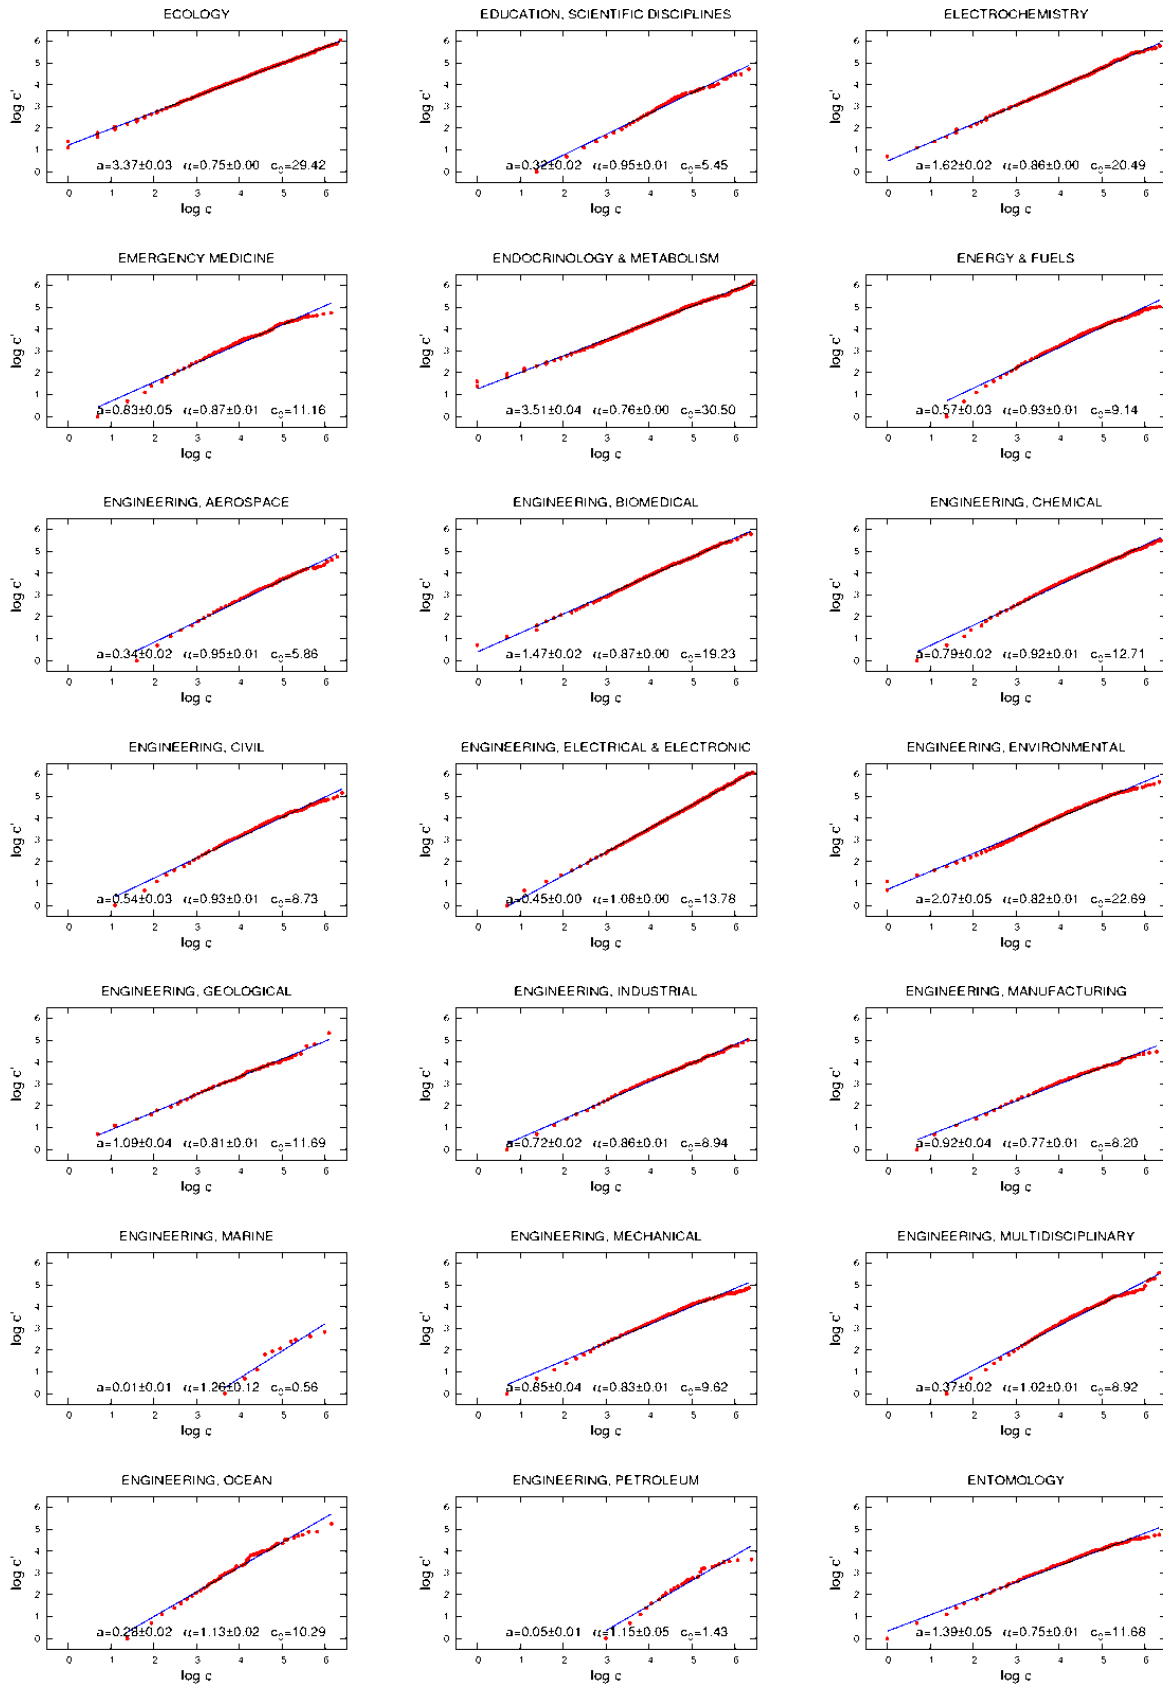

Figure S60: Publication year 1995.

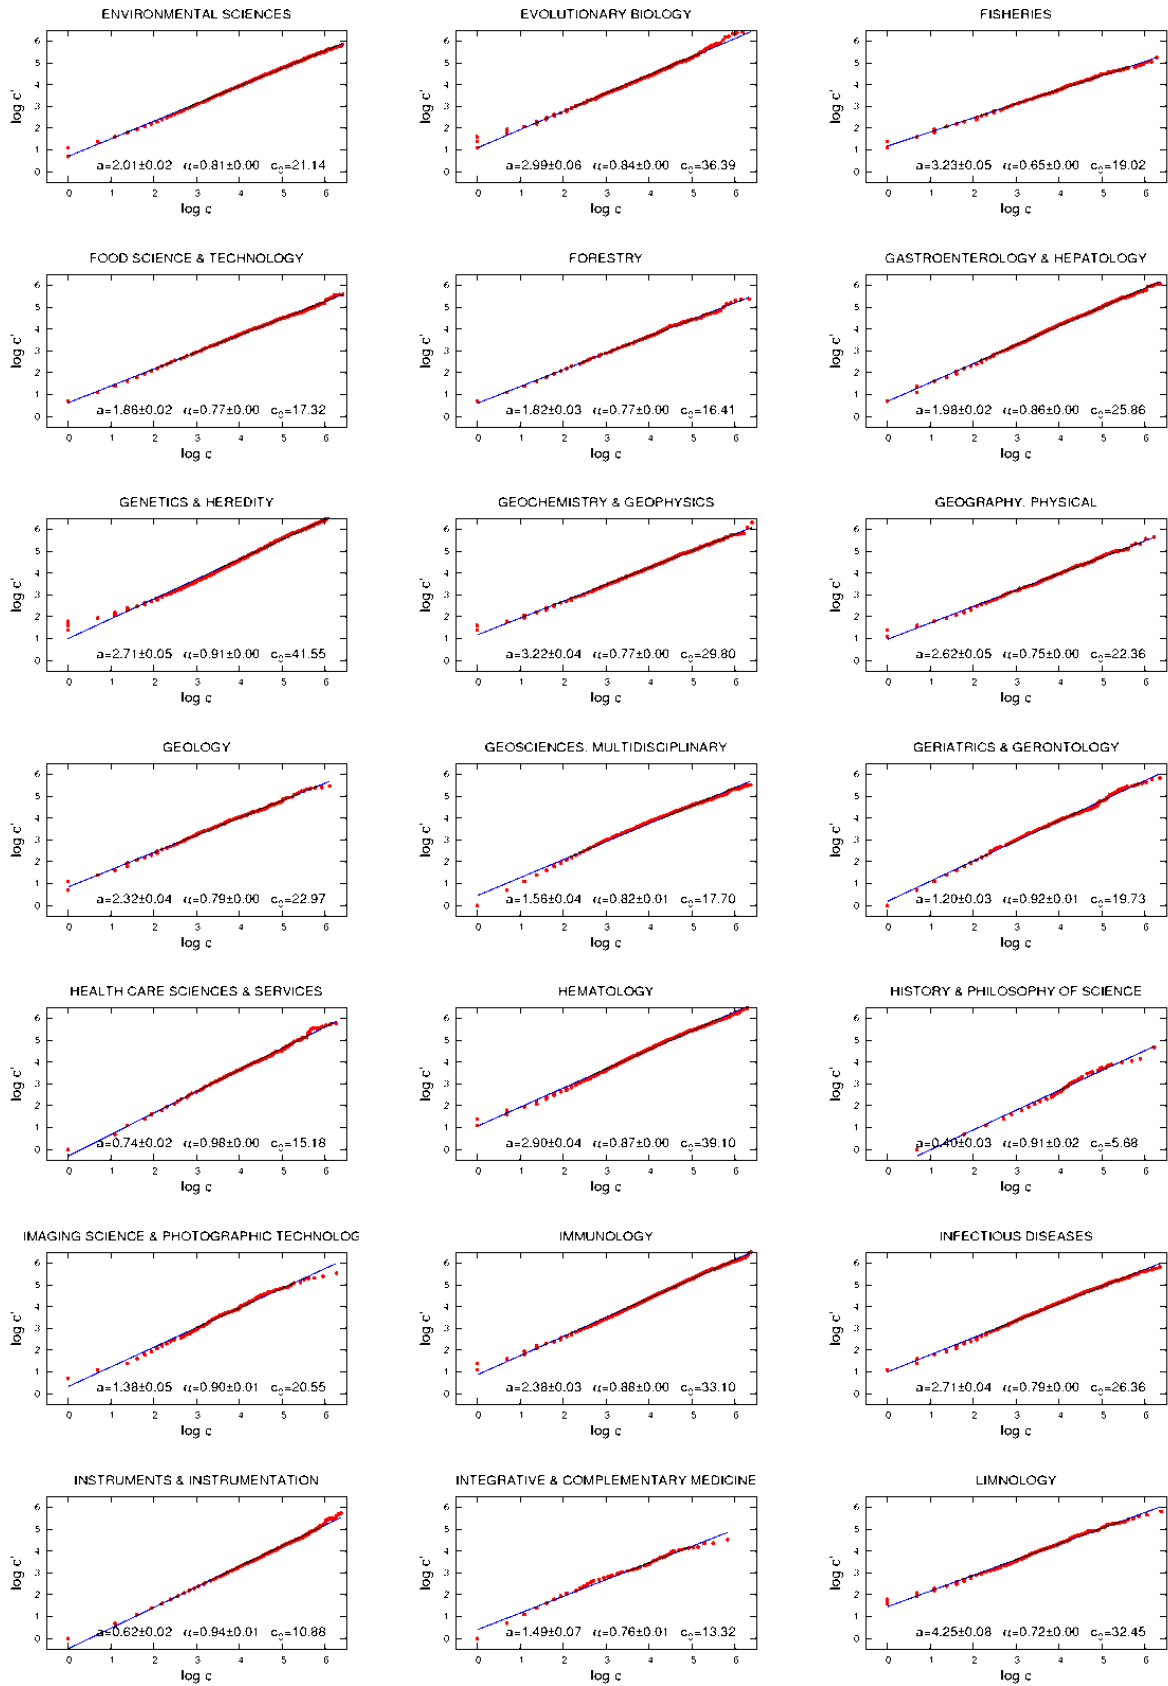

Figure S61: Publication year 1995.

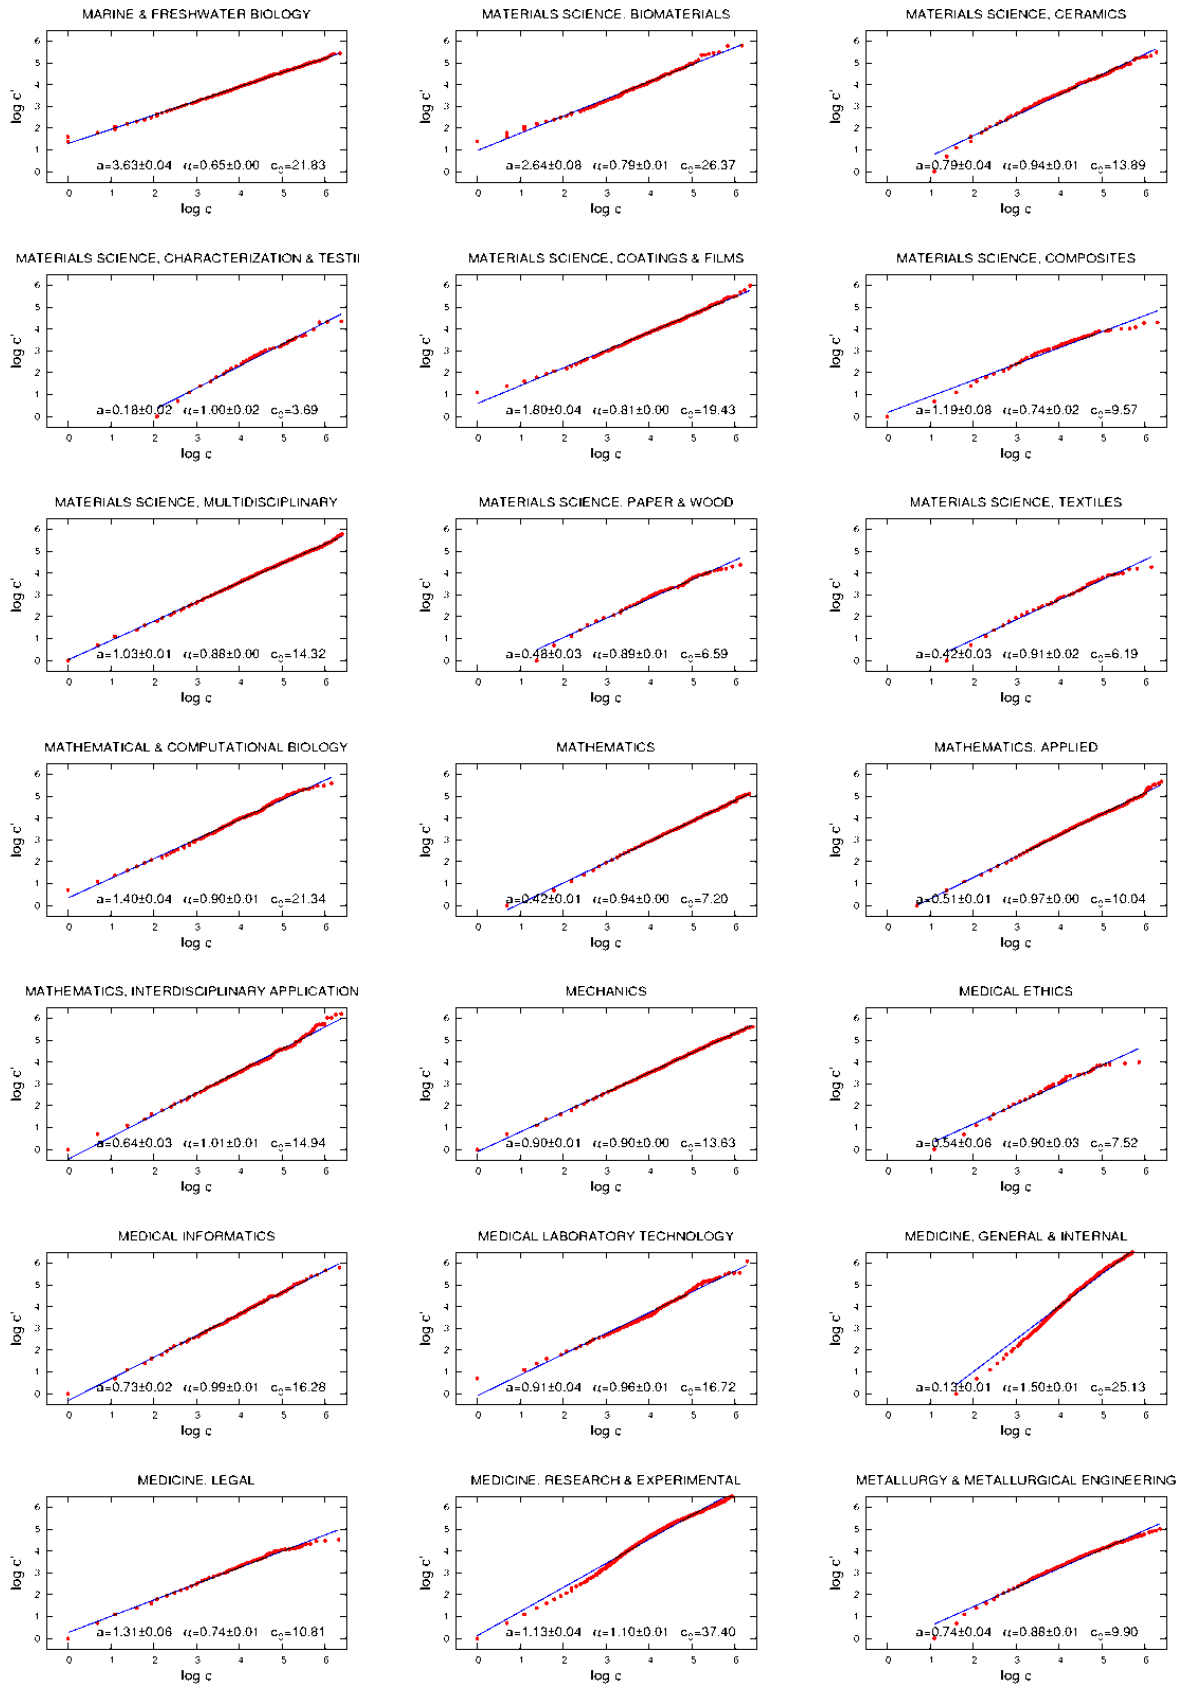

Figure S62: Publication year 1995.

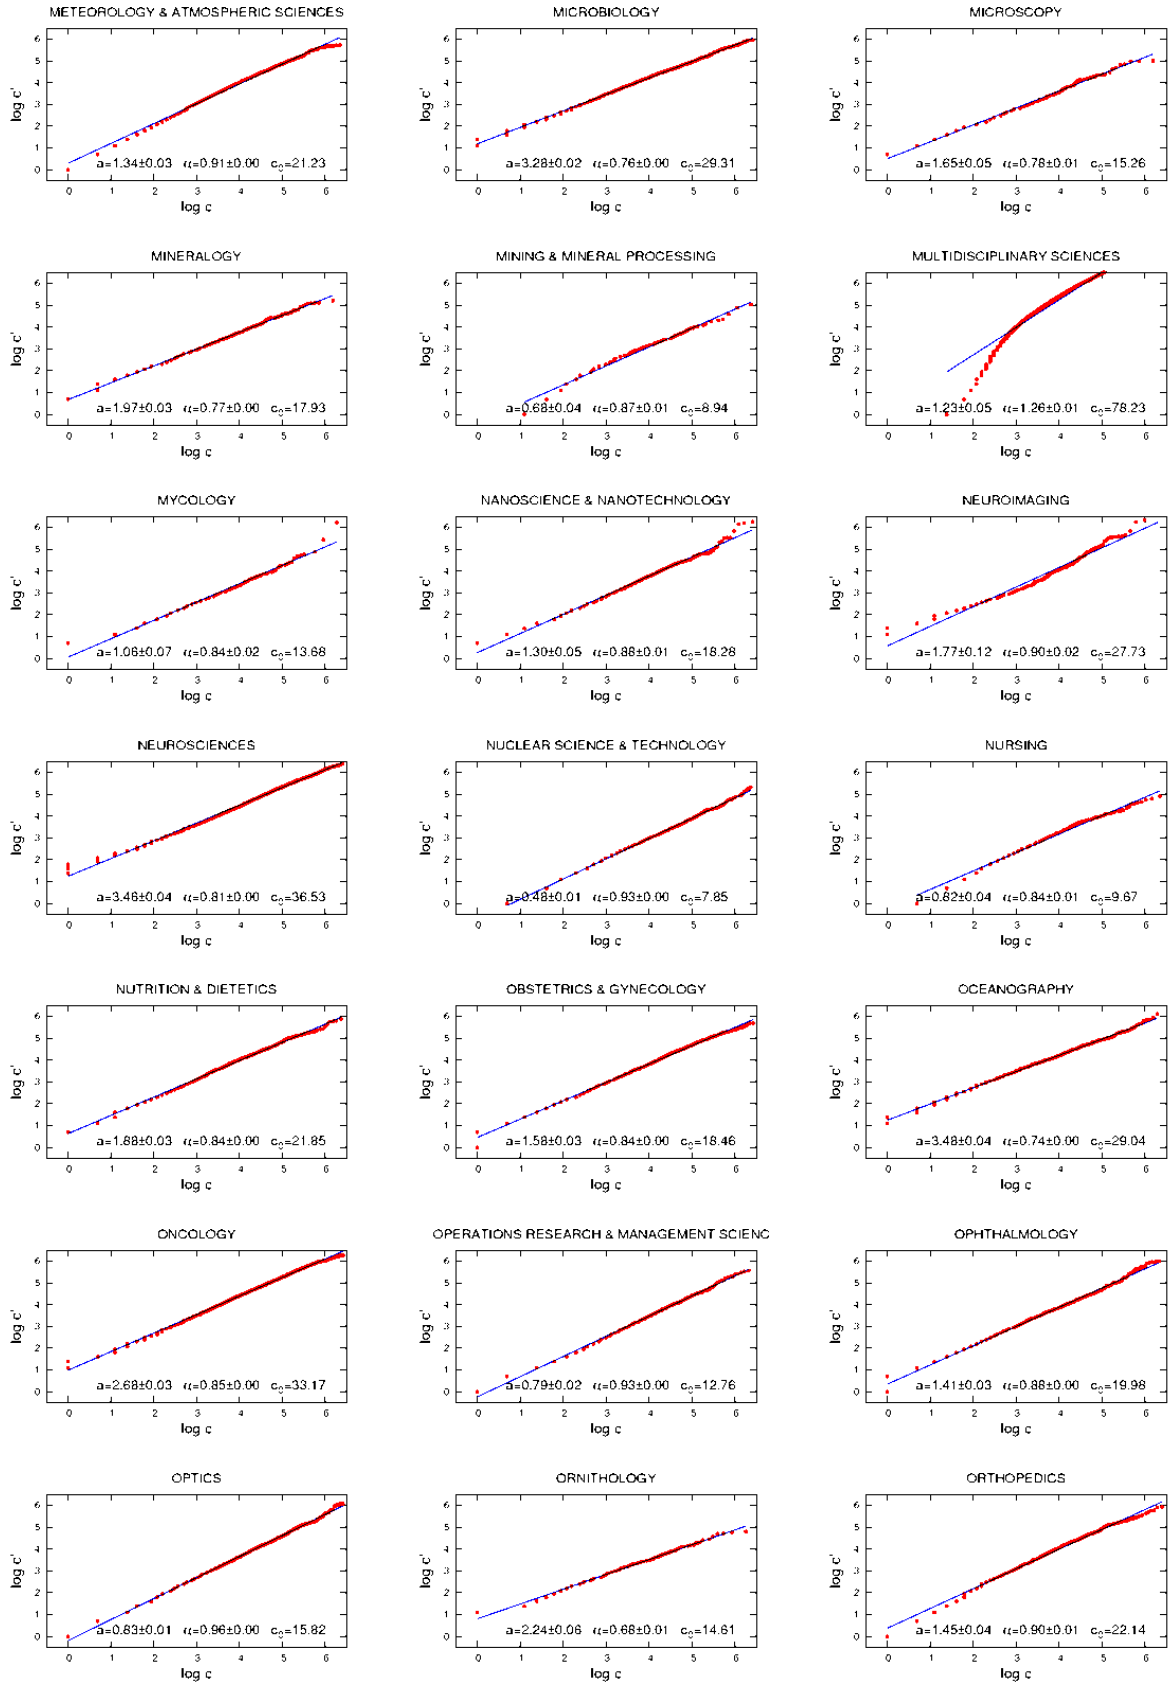

Figure S63: Publication year 1995.

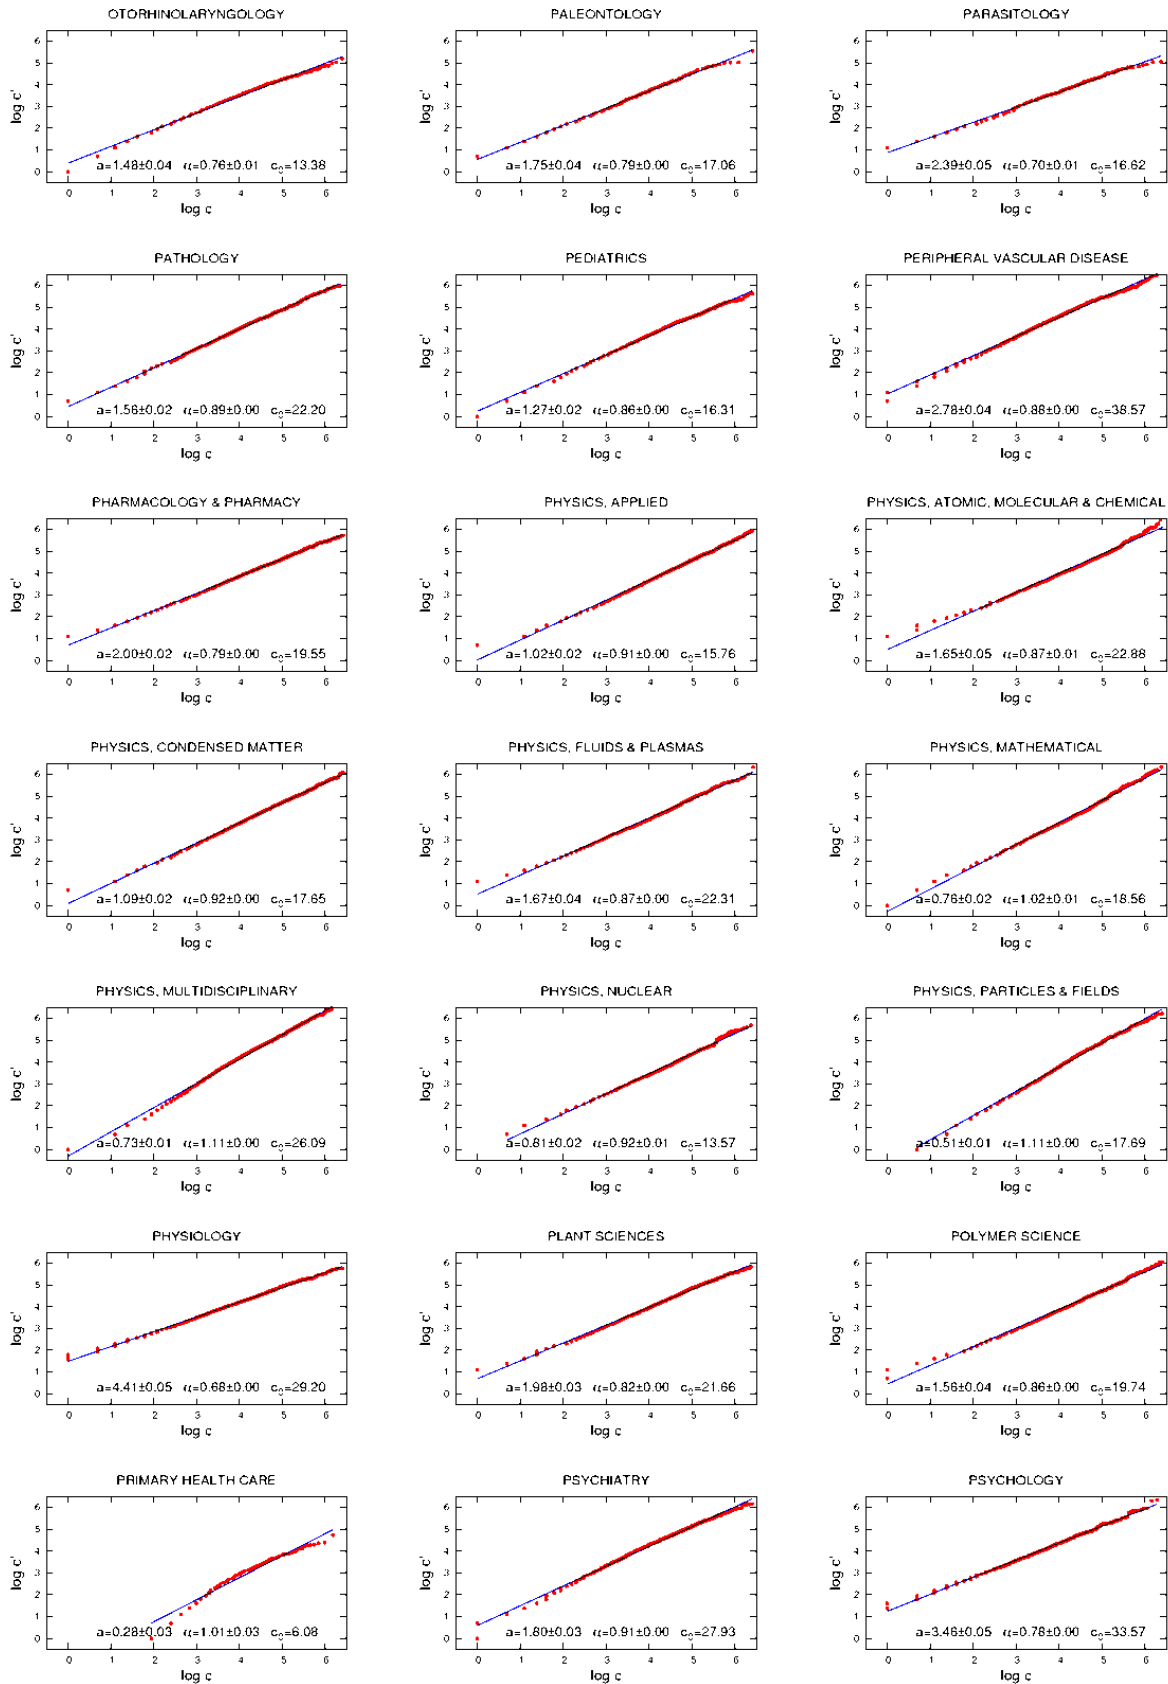

Figure S64: Publication year 1995.

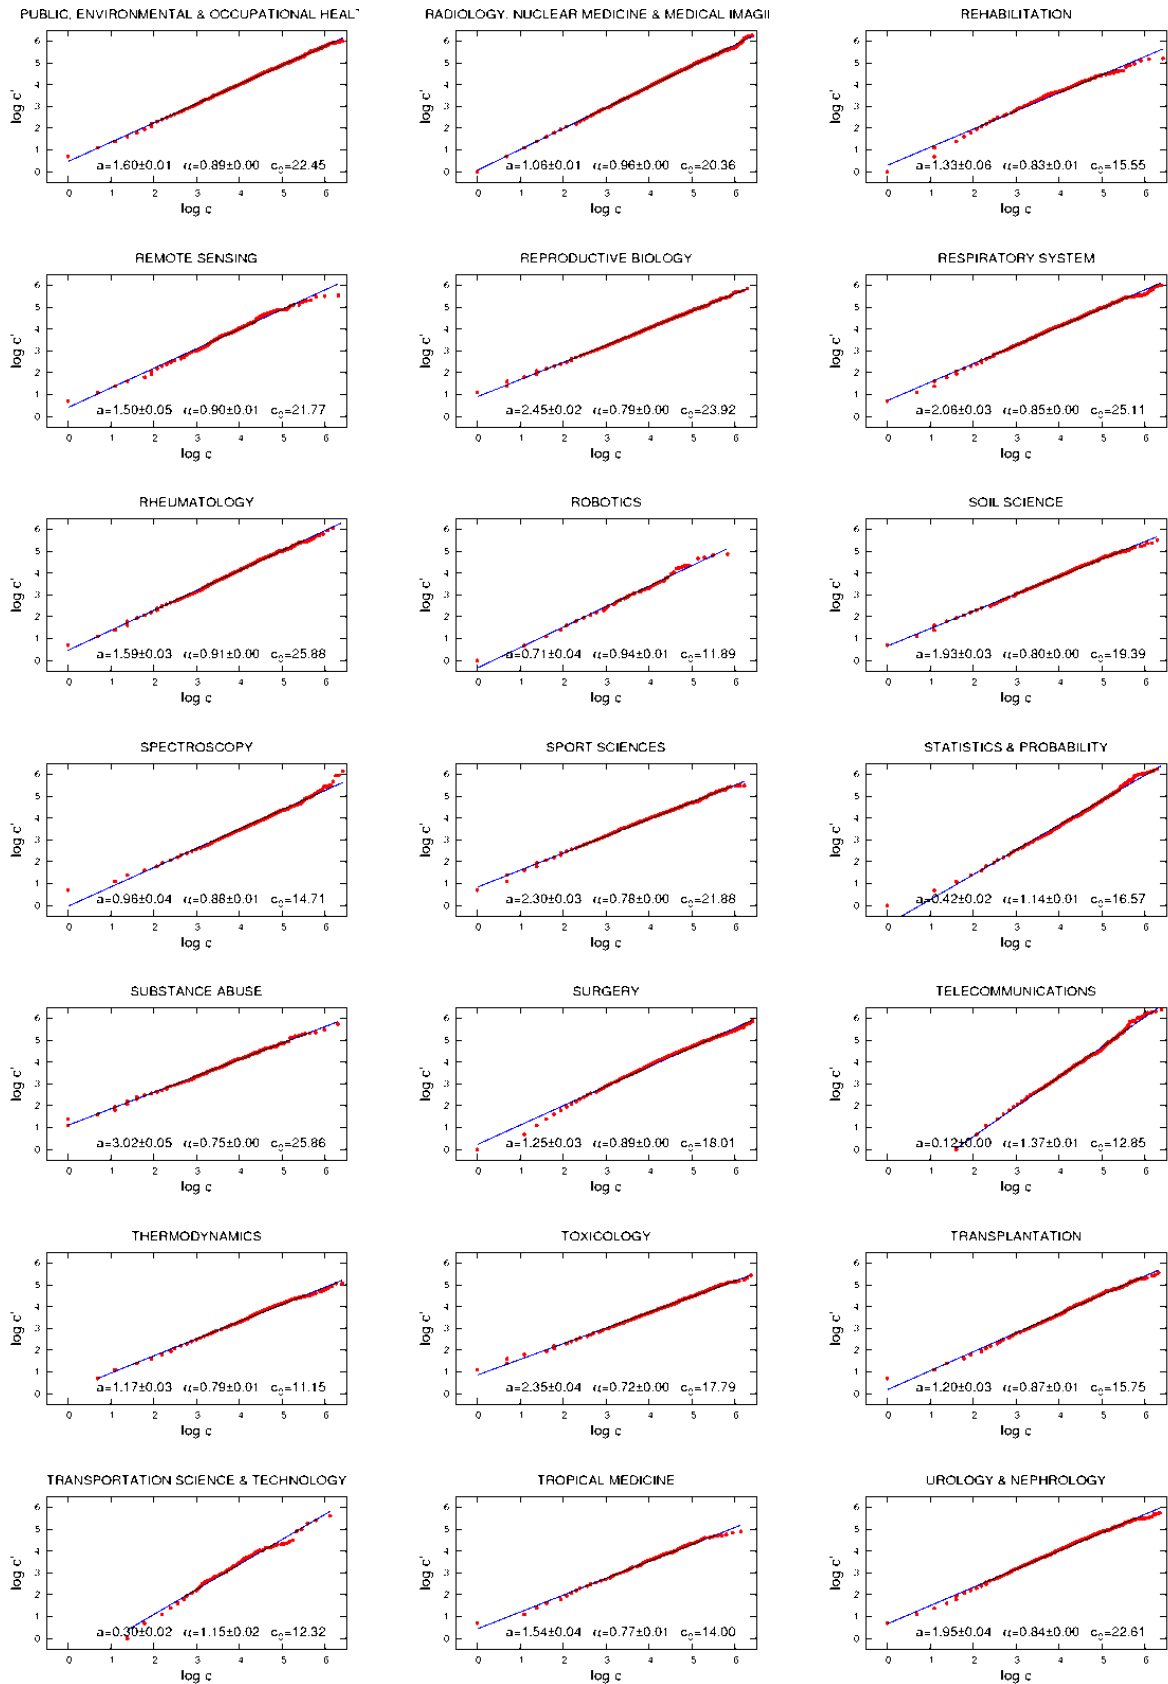

Figure S65: Publication year 1995.



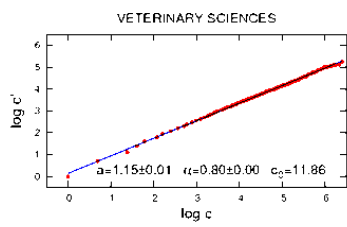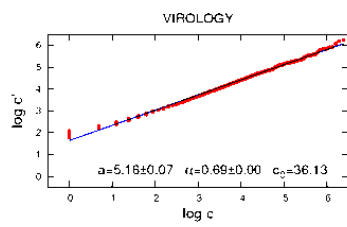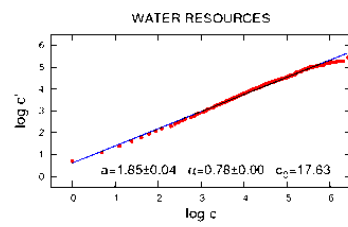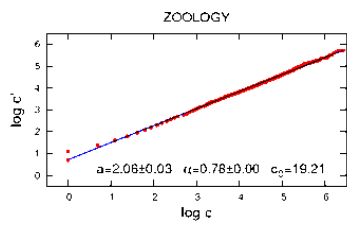

Figure S66: Publication year 1995.

| Subject-category                                 | $a$         | $\alpha$    | $\langle c \rangle$ | $N$    |
|--------------------------------------------------|-------------|-------------|---------------------|--------|
| ACOUSTICS                                        | 1.10 ± 0.02 | 0.86 ± 0.00 | 13.80               | 2,719  |
| AGRICULTURAL ECONOMICS & POLICY                  | 0.99 ± 0.02 | 0.81 ± 0.01 | 10.42               | 576    |
| AGRICULTURE, DAIRY & ANIMAL SCIENCE              | 1.22 ± 0.02 | 0.86 ± 0.00 | 15.90               | 2,610  |
| AGRICULTURE, MULTIDISCIPLINARY                   | 0.92 ± 0.02 | 0.91 ± 0.01 | 14.50               | 1,818  |
| AGRONOMY                                         | 1.45 ± 0.03 | 0.82 ± 0.00 | 15.42               | 3,888  |
| ALLERGY                                          | 1.83 ± 0.04 | 0.81 ± 0.00 | 18.94               | 1,625  |
| ANATOMY & MORPHOLOGY                             | 1.62 ± 0.07 | 0.84 ± 0.01 | 22.84               | 675    |
| ANDROLOGY                                        | 1.57 ± 0.07 | 0.74 ± 0.01 | 13.07               | 201    |
| ANESTHESIOLOGY                                   | 0.80 ± 0.04 | 0.98 ± 0.01 | 15.86               | 3,454  |
| ASTRONOMY & ASTROPHYSICS                         | 1.36 ± 0.01 | 0.97 ± 0.00 | 27.15               | 8,825  |
| AUTOMATION & CONTROL SYSTEMS                     | 0.41 ± 0.01 | 1.12 ± 0.00 | 14.84               | 2,485  |
| BEHAVIORAL SCIENCES                              | 3.70 ± 0.04 | 0.70 ± 0.00 | 26.57               | 2,950  |
| BIOCHEMICAL RESEARCH METHODS                     | 2.05 ± 0.03 | 0.80 ± 0.00 | 20.90               | 4,985  |
| BIOCHEMISTRY & MOLECULAR BIOLOGY                 | 3.00 ± 0.04 | 0.89 ± 0.00 | 43.96               | 34,475 |
| BIODIVERSITY CONSERVATION                        | 1.18 ± 0.05 | 0.94 ± 0.01 | 20.16               | 1,053  |
| BIOLOGY                                          | 0.93 ± 0.02 | 0.94 ± 0.00 | 15.92               | 4,420  |
| BIOPHYSICS                                       | 3.51 ± 0.06 | 0.75 ± 0.00 | 30.02               | 7,617  |
| BIOTECHNOLOGY & APPLIED MICROBIOLOGY             | 2.11 ± 0.02 | 0.80 ± 0.00 | 21.17               | 9,366  |
| CARDIAC & CARDIOVASCULAR SYSTEMS                 | 1.67 ± 0.03 | 0.93 ± 0.00 | 28.18               | 9,760  |
| CELL & TISSUE ENGINEERING                        | 1.88 ± 0.07 | 0.75 ± 0.01 | 17.02               | 185    |
| CELL BIOLOGY                                     | 3.00 ± 0.03 | 0.95 ± 0.00 | 54.26               | 14,729 |
| CHEMISTRY, ANALYTICAL                            | 1.89 ± 0.03 | 0.81 ± 0.00 | 19.87               | 9,948  |
| CHEMISTRY, APPLIED                               | 1.13 ± 0.03 | 0.86 ± 0.00 | 14.35               | 4,284  |
| CHEMISTRY, INORGANIC & NUCLEAR                   | 2.73 ± 0.04 | 0.70 ± 0.00 | 18.87               | 5,946  |
| CHEMISTRY, MEDICINAL                             | 1.69 ± 0.05 | 0.80 ± 0.01 | 17.22               | 4,043  |
| CHEMISTRY, MULTIDISCIPLINARY                     | 0.90 ± 0.02 | 1.01 ± 0.00 | 20.47               | 13,790 |
| CHEMISTRY, ORGANIC                               | 2.90 ± 0.04 | 0.68 ± 0.00 | 19.03               | 11,480 |
| CHEMISTRY, PHYSICAL                              | 1.85 ± 0.02 | 0.83 ± 0.00 | 21.55               | 17,819 |
| CLINICAL NEUROLOGY                               | 1.50 ± 0.04 | 0.92 ± 0.01 | 24.92               | 11,622 |
| COMPUTER SCIENCE, ARTIFICIAL INTELLIGENCE        | 0.54 ± 0.01 | 1.14 ± 0.00 | 22.83               | 3,022  |
| COMPUTER SCIENCE, CYBERNETICS                    | 0.24 ± 0.02 | 1.16 ± 0.02 | 10.59               | 606    |
| COMPUTER SCIENCE, HARDWARE & ARCHITECTURE        | 0.26 ± 0.01 | 1.23 ± 0.00 | 15.40               | 2,148  |
| COMPUTER SCIENCE, INFORMATION SYSTEMS            | 0.18 ± 0.01 | 1.24 ± 0.01 | 12.08               | 2,271  |
| COMPUTER SCIENCE, INTERDISCIPLINARY APPLICATIONS | 0.29 ± 0.02 | 1.15 ± 0.01 | 12.61               | 3,913  |
| COMPUTER SCIENCE, SOFTWARE ENGINEERING           | 0.26 ± 0.01 | 1.18 ± 0.01 | 12.13               | 2,709  |
| COMPUTER SCIENCE, THEORY & METHODS               | 0.40 ± 0.01 | 1.11 ± 0.01 | 14.68               | 3,085  |
| CONSTRUCTION & BUILDING TECHNOLOGY               | 0.94 ± 0.04 | 0.82 ± 0.01 | 10.32               | 1,170  |
| CRITICAL CARE MEDICINE                           | 1.77 ± 0.03 | 0.91 ± 0.00 | 28.32               | 2,641  |
| CRYSTALLOGRAPHY                                  | 0.83 ± 0.03 | 0.85 ± 0.01 | 11.70               | 3,909  |
| DENTISTRY, ORAL SURGERY & MEDICINE               | 1.23 ± 0.02 | 0.84 ± 0.00 | 14.93               | 3,608  |
| DERMATOLOGY                                      | 1.30 ± 0.03 | 0.84 ± 0.00 | 15.45               | 4,152  |
| DEVELOPMENTAL BIOLOGY                            | 4.80 ± 0.07 | 0.86 ± 0.00 | 62.67               | 2,265  |
| ECOLOGY                                          | 3.37 ± 0.03 | 0.75 ± 0.00 | 29.42               | 6,127  |
| EDUCATION, SCIENTIFIC DISCIPLINES                | 0.32 ± 0.02 | 0.95 ± 0.01 | 5.45                | 1,635  |
| ELECTROCHEMISTRY                                 | 1.62 ± 0.02 | 0.86 ± 0.00 | 20.49               | 3,399  |
| EMERGENCY MEDICINE                               | 0.83 ± 0.05 | 0.87 ± 0.01 | 11.16               | 1,107  |
| ENDOCRINOLOGY & METABOLISM                       | 3.51 ± 0.04 | 0.76 ± 0.00 | 30.50               | 8,898  |
| ENERGY & FUELS                                   | 0.57 ± 0.03 | 0.93 ± 0.01 | 9.14                | 4,235  |
| ENGINEERING, AEROSPACE                           | 0.34 ± 0.02 | 0.95 ± 0.01 | 5.86                | 2,276  |
| ENGINEERING, BIOMEDICAL                          | 1.47 ± 0.02 | 0.87 ± 0.00 | 19.23               | 2,711  |

Table S25: Publication year 1995.

| Subject-category                              | $a$         | $\alpha$    | $\langle c \rangle$ | $N$    |
|-----------------------------------------------|-------------|-------------|---------------------|--------|
| ENGINEERING, CHEMICAL                         | 0.79 ± 0.02 | 0.92 ± 0.01 | 12.71               | 9,116  |
| ENGINEERING, CIVIL                            | 0.54 ± 0.03 | 0.93 ± 0.01 | 8.73                | 3,780  |
| ENGINEERING, ELECTRICAL & ELECTRONIC          | 0.45 ± 0.00 | 1.08 ± 0.00 | 13.78               | 19,938 |
| ENGINEERING, ENVIRONMENTAL                    | 2.07 ± 0.05 | 0.82 ± 0.01 | 22.69               | 2,516  |
| ENGINEERING, GEOLOGICAL                       | 1.09 ± 0.04 | 0.81 ± 0.01 | 11.69               | 494    |
| ENGINEERING, INDUSTRIAL                       | 0.72 ± 0.02 | 0.86 ± 0.01 | 8.94                | 2,347  |
| ENGINEERING, MANUFACTURING                    | 0.92 ± 0.04 | 0.77 ± 0.01 | 8.20                | 1,505  |
| ENGINEERING, MARINE                           | 0.01 ± 0.01 | 1.26 ± 0.12 | 0.56                | 396    |
| ENGINEERING, MECHANICAL                       | 0.85 ± 0.04 | 0.83 ± 0.01 | 9.62                | 5,749  |
| ENGINEERING, MULTIDISCIPLINARY                | 0.37 ± 0.02 | 1.02 ± 0.01 | 8.92                | 3,267  |
| ENGINEERING, OCEAN                            | 0.28 ± 0.02 | 1.13 ± 0.02 | 10.29               | 549    |
| ENGINEERING, PETROLEUM                        | 0.05 ± 0.01 | 1.15 ± 0.05 | 1.43                | 932    |
| ENTOMOLOGY                                    | 1.39 ± 0.05 | 0.75 ± 0.01 | 11.68               | 3,338  |
| ENVIRONMENTAL SCIENCES                        | 2.01 ± 0.02 | 0.81 ± 0.00 | 21.14               | 10,689 |
| EVOLUTIONARY BIOLOGY                          | 2.99 ± 0.06 | 0.84 ± 0.00 | 36.39               | 1,789  |
| FISHERIES                                     | 3.23 ± 0.05 | 0.65 ± 0.00 | 19.02               | 2,229  |
| FOOD SCIENCE & TECHNOLOGY                     | 1.86 ± 0.02 | 0.77 ± 0.00 | 17.32               | 5,851  |
| FORESTRY                                      | 1.82 ± 0.03 | 0.77 ± 0.00 | 16.41               | 1,643  |
| GASTROENTEROLOGY & HEPATOLOGY                 | 1.98 ± 0.02 | 0.86 ± 0.00 | 25.86               | 6,025  |
| GENETICS & HEREDITY                           | 2.71 ± 0.05 | 0.91 ± 0.00 | 41.55               | 9,477  |
| GEOCHEMISTRY & GEOPHYSICS                     | 3.22 ± 0.04 | 0.77 ± 0.00 | 29.80               | 3,829  |
| GEOGRAPHY, PHYSICAL                           | 2.62 ± 0.05 | 0.75 ± 0.00 | 22.36               | 1,281  |
| GEOLOGY                                       | 2.32 ± 0.04 | 0.79 ± 0.00 | 22.97               | 1,015  |
| GEOSCIENCES, MULTIDISCIPLINARY                | 1.56 ± 0.04 | 0.82 ± 0.01 | 17.70               | 6,210  |
| GERIATRICS & GERONTOLOGY                      | 1.20 ± 0.03 | 0.92 ± 0.01 | 19.73               | 1,730  |
| HEALTH CARE SCIENCES & SERVICES               | 0.74 ± 0.02 | 0.98 ± 0.00 | 15.18               | 2,122  |
| HEMATOLOGY                                    | 2.90 ± 0.04 | 0.87 ± 0.00 | 39.10               | 7,651  |
| HISTORY & PHILOSOPHY OF SCIENCE               | 0.40 ± 0.03 | 0.91 ± 0.02 | 5.68                | 647    |
| IMAGING SCIENCE & PHOTOGRAPHIC TECHNOLOGY     | 1.38 ± 0.05 | 0.90 ± 0.01 | 20.55               | 726    |
| IMMUNOLOGY                                    | 2.38 ± 0.03 | 0.88 ± 0.00 | 33.10               | 15,607 |
| INFECTIOUS DISEASES                           | 2.71 ± 0.04 | 0.79 ± 0.00 | 26.36               | 5,173  |
| INSTRUMENTS & INSTRUMENTATION                 | 0.62 ± 0.02 | 0.94 ± 0.01 | 10.88               | 7,175  |
| INTEGRATIVE & COMPLEMENTARY MEDICINE          | 1.49 ± 0.07 | 0.76 ± 0.01 | 13.32               | 282    |
| LIMNOLOGY                                     | 4.25 ± 0.08 | 0.72 ± 0.00 | 32.45               | 911    |
| MARINE & FRESHWATER BIOLOGY                   | 3.63 ± 0.04 | 0.65 ± 0.00 | 21.83               | 5,200  |
| MATERIALS SCIENCE, BIOMATERIALS               | 2.64 ± 0.08 | 0.79 ± 0.01 | 26.37               | 574    |
| MATERIALS SCIENCE, CERAMICS                   | 0.79 ± 0.04 | 0.94 ± 0.01 | 13.89               | 2,171  |
| MATERIALS SCIENCE, CHARACTERIZATION & TESTING | 0.18 ± 0.02 | 1.00 ± 0.02 | 3.69                | 920    |
| MATERIALS SCIENCE, COATINGS & FILMS           | 1.80 ± 0.04 | 0.81 ± 0.00 | 19.43               | 2,600  |
| MATERIALS SCIENCE, COMPOSITES                 | 1.19 ± 0.08 | 0.74 ± 0.02 | 9.57                | 770    |
| MATERIALS SCIENCE, MULTIDISCIPLINARY          | 1.03 ± 0.01 | 0.88 ± 0.00 | 14.32               | 18,071 |
| MATERIALS SCIENCE, PAPER & WOOD               | 0.48 ± 0.03 | 0.89 ± 0.01 | 6.59                | 1,059  |
| MATERIALS SCIENCE, TEXTILES                   | 0.42 ± 0.03 | 0.91 ± 0.02 | 6.19                | 561    |
| MATHEMATICAL & COMPUTATIONAL BIOLOGY          | 1.40 ± 0.04 | 0.90 ± 0.01 | 21.34               | 1,129  |
| MATHEMATICS                                   | 0.42 ± 0.01 | 0.94 ± 0.00 | 7.20                | 10,070 |
| MATHEMATICS, APPLIED                          | 0.51 ± 0.01 | 0.97 ± 0.00 | 10.04               | 7,404  |
| MATHEMATICS, INTERDISCIPLINARY APPLICATIONS   | 0.64 ± 0.03 | 1.01 ± 0.01 | 14.94               | 2,751  |
| MECHANICS                                     | 0.90 ± 0.01 | 0.90 ± 0.00 | 13.63               | 6,810  |
| MEDICAL ETHICS                                | 0.54 ± 0.06 | 0.90 ± 0.03 | 7.52                | 305    |
| MEDICAL INFORMATICS                           | 0.73 ± 0.02 | 0.99 ± 0.01 | 16.28               | 835    |

Table S26: Publication year 1995.

| Subject-category                              | $a$             | $\alpha$        | $\langle c \rangle$ | $N$    |
|-----------------------------------------------|-----------------|-----------------|---------------------|--------|
| MEDICAL LABORATORY TECHNOLOGY                 | $0.91 \pm 0.04$ | $0.96 \pm 0.01$ | 16.72               | 1,524  |
| MEDICINE, GENERAL & INTERNAL                  | $0.13 \pm 0.01$ | $1.50 \pm 0.01$ | 25.13               | 15,177 |
| MEDICINE, LEGAL                               | $1.31 \pm 0.06$ | $0.74 \pm 0.01$ | 10.81               | 806    |
| MEDICINE, RESEARCH & EXPERIMENTAL             | $1.13 \pm 0.04$ | $1.10 \pm 0.01$ | 37.40               | 7,096  |
| METALLURGY & METALLURGICAL ENGINEERING        | $0.74 \pm 0.04$ | $0.88 \pm 0.01$ | 9.90                | 3,460  |
| METEOROLOGY & ATMOSPHERIC SCIENCES            | $1.34 \pm 0.03$ | $0.91 \pm 0.00$ | 21.23               | 5,137  |
| MICROBIOLOGY                                  | $3.28 \pm 0.02$ | $0.76 \pm 0.00$ | 29.31               | 9,711  |
| MICROSCOPY                                    | $1.65 \pm 0.05$ | $0.78 \pm 0.01$ | 15.26               | 607    |
| MINERALOGY                                    | $1.97 \pm 0.03$ | $0.77 \pm 0.00$ | 17.93               | 1,201  |
| MINING & MINERAL PROCESSING                   | $0.68 \pm 0.04$ | $0.87 \pm 0.01$ | 8.94                | 901    |
| MULTIDISCIPLINARY SCIENCES                    | $1.23 \pm 0.05$ | $1.26 \pm 0.01$ | 78.23               | 10,747 |
| MYCOLOGY                                      | $1.06 \pm 0.07$ | $0.84 \pm 0.02$ | 13.68               | 740    |
| NANOSCIENCE & NANOTECHNOLOGY                  | $1.30 \pm 0.05$ | $0.88 \pm 0.01$ | 18.28               | 1,921  |
| NEUROIMAGING                                  | $1.77 \pm 0.12$ | $0.90 \pm 0.02$ | 27.73               | 786    |
| NEUROSCIENCES                                 | $3.46 \pm 0.04$ | $0.81 \pm 0.00$ | 36.53               | 18,196 |
| NUCLEAR SCIENCE & TECHNOLOGY                  | $0.48 \pm 0.01$ | $0.93 \pm 0.00$ | 7.85                | 7,094  |
| NURSING                                       | $0.82 \pm 0.04$ | $0.84 \pm 0.01$ | 9.67                | 1,694  |
| NUTRITION & DIETETICS                         | $1.88 \pm 0.03$ | $0.84 \pm 0.00$ | 21.85               | 3,582  |
| OBSTETRICS & GYNECOLOGY                       | $1.58 \pm 0.03$ | $0.84 \pm 0.00$ | 18.46               | 5,886  |
| OCEANOGRAPHY                                  | $3.48 \pm 0.04$ | $0.74 \pm 0.00$ | 29.04               | 3,058  |
| ONCOLOGY                                      | $2.68 \pm 0.03$ | $0.85 \pm 0.00$ | 33.17               | 13,851 |
| OPERATIONS RESEARCH & MANAGEMENT SCIENCE      | $0.79 \pm 0.02$ | $0.93 \pm 0.00$ | 12.76               | 3,257  |
| OPHTHALMOLOGY                                 | $1.41 \pm 0.03$ | $0.88 \pm 0.00$ | 19.98               | 4,086  |
| OPTICS                                        | $0.83 \pm 0.01$ | $0.96 \pm 0.00$ | 15.82               | 9,713  |
| ORNITHOLOGY                                   | $2.24 \pm 0.06$ | $0.68 \pm 0.01$ | 14.61               | 696    |
| ORTHOPEDICS                                   | $1.45 \pm 0.04$ | $0.90 \pm 0.01$ | 22.14               | 3,826  |
| OTORHINOLARYNGOLOGY                           | $1.48 \pm 0.04$ | $0.76 \pm 0.01$ | 13.38               | 2,863  |
| PALEONTOLOGY                                  | $1.75 \pm 0.04$ | $0.79 \pm 0.00$ | 17.06               | 964    |
| PARASITOLOGY                                  | $2.39 \pm 0.05$ | $0.70 \pm 0.01$ | 16.62               | 1,798  |
| PATHOLOGY                                     | $1.56 \pm 0.02$ | $0.89 \pm 0.00$ | 22.20               | 5,140  |
| PEDIATRICS                                    | $1.27 \pm 0.02$ | $0.86 \pm 0.00$ | 16.31               | 7,744  |
| PERIPHERAL VASCULAR DISEASE                   | $2.78 \pm 0.04$ | $0.88 \pm 0.00$ | 38.57               | 6,683  |
| PHARMACOLOGY & PHARMACY                       | $2.00 \pm 0.02$ | $0.79 \pm 0.00$ | 19.55               | 17,962 |
| PHYSICS, APPLIED                              | $1.02 \pm 0.02$ | $0.91 \pm 0.00$ | 15.76               | 17,273 |
| PHYSICS, ATOMIC, MOLECULAR & CHEMICAL         | $1.65 \pm 0.05$ | $0.87 \pm 0.01$ | 22.88               | 8,798  |
| PHYSICS, CONDENSED MATTER                     | $1.09 \pm 0.02$ | $0.92 \pm 0.00$ | 17.65               | 15,933 |
| PHYSICS, FLUIDS & PLASMAS                     | $1.67 \pm 0.04$ | $0.87 \pm 0.00$ | 22.31               | 3,972  |
| PHYSICS, MATHEMATICAL                         | $0.76 \pm 0.02$ | $1.02 \pm 0.01$ | 18.56               | 4,618  |
| PHYSICS, MULTIDISCIPLINARY                    | $0.73 \pm 0.01$ | $1.11 \pm 0.00$ | 26.09               | 10,727 |
| PHYSICS, NUCLEAR                              | $0.81 \pm 0.02$ | $0.92 \pm 0.01$ | 13.57               | 4,457  |
| PHYSICS, PARTICLES & FIELDS                   | $0.51 \pm 0.01$ | $1.11 \pm 0.00$ | 17.69               | 5,655  |
| PHYSIOLOGY                                    | $4.41 \pm 0.05$ | $0.68 \pm 0.00$ | 29.20               | 6,698  |
| PLANT SCIENCES                                | $1.98 \pm 0.03$ | $0.82 \pm 0.00$ | 21.66               | 11,670 |
| POLYMER SCIENCE                               | $1.56 \pm 0.04$ | $0.86 \pm 0.00$ | 19.74               | 7,586  |
| PRIMARY HEALTH CARE                           | $0.28 \pm 0.03$ | $1.01 \pm 0.03$ | 6.08                | 1,196  |
| PSYCHIATRY                                    | $1.80 \pm 0.03$ | $0.91 \pm 0.00$ | 27.93               | 6,617  |
| PSYCHOLOGY                                    | $3.46 \pm 0.05$ | $0.78 \pm 0.00$ | 33.57               | 2,246  |
| PUBLIC, ENVIRONMENTAL & OCCUPATIONAL HEALTH   | $1.60 \pm 0.01$ | $0.89 \pm 0.00$ | 22.45               | 6,847  |
| RADIOLOGY, NUCLEAR MEDICINE & MEDICAL IMAGING | $1.06 \pm 0.01$ | $0.96 \pm 0.00$ | 20.36               | 9,628  |
| REHABILITATION                                | $1.33 \pm 0.06$ | $0.83 \pm 0.01$ | 15.55               | 986    |

Table S27: Publication year 1995.

| Subject-category                    | $a$                               | $\alpha$                          | $\langle c \rangle$ | $N$            |
|-------------------------------------|-----------------------------------|-----------------------------------|---------------------|----------------|
| REMOTE SENSING                      | $1.50 \pm 0.05$                   | $0.90 \pm 0.01$                   | 21.77               | 797            |
| REPRODUCTIVE BIOLOGY                | $2.45 \pm 0.02$                   | $0.79 \pm 0.00$                   | 23.92               | 3,055          |
| RESPIRATORY SYSTEM                  | $2.06 \pm 0.03$                   | $0.85 \pm 0.00$                   | 25.11               | 5,483          |
| RHEUMATOLOGY                        | $1.59 \pm 0.03$                   | $0.91 \pm 0.00$                   | 25.88               | 1,832          |
| ROBOTICS                            | $0.71 \pm 0.04$                   | $0.94 \pm 0.01$                   | 11.89               | 282            |
| SOIL SCIENCE                        | $1.93 \pm 0.03$                   | $0.80 \pm 0.00$                   | 19.39               | 2,286          |
| SPECTROSCOPY                        | $0.96 \pm 0.04$                   | $0.88 \pm 0.01$                   | 14.71               | 4,871          |
| SPORT SCIENCES                      | $2.30 \pm 0.03$                   | $0.78 \pm 0.00$                   | 21.88               | 2,589          |
| STATISTICS & PROBABILITY            | $0.42 \pm 0.02$                   | $1.14 \pm 0.01$                   | 16.57               | 3,710          |
| SUBSTANCE ABUSE                     | $3.02 \pm 0.05$                   | $0.75 \pm 0.00$                   | 25.86               | 778            |
| SURGERY                             | $1.25 \pm 0.03$                   | $0.89 \pm 0.00$                   | 18.01               | 18,445         |
| TELECOMMUNICATIONS                  | $0.12 \pm 0.00$                   | $1.37 \pm 0.01$                   | 12.85               | 2,788          |
| THERMODYNAMICS                      | $1.17 \pm 0.03$                   | $0.79 \pm 0.01$                   | 11.15               | 2,860          |
| TOXICOLOGY                          | $2.35 \pm 0.04$                   | $0.72 \pm 0.00$                   | 17.79               | 4,475          |
| TRANSPLANTATION                     | $1.20 \pm 0.03$                   | $0.87 \pm 0.01$                   | 15.75               | 4,038          |
| TRANSPORTATION SCIENCE & TECHNOLOGY | $0.30 \pm 0.02$                   | $1.15 \pm 0.02$                   | 12.32               | 520            |
| TROPICAL MEDICINE                   | $1.54 \pm 0.04$                   | $0.77 \pm 0.01$                   | 14.00               | 1,075          |
| UROLOGY & NEPHROLOGY                | $1.95 \pm 0.04$                   | $0.84 \pm 0.00$                   | 22.61               | 5,086          |
| VETERINARY SCIENCES                 | $1.15 \pm 0.01$                   | $0.80 \pm 0.00$                   | 11.86               | 5,685          |
| VIROLOGY                            | $5.16 \pm 0.07$                   | $0.69 \pm 0.00$                   | 36.13               | 3,743          |
| WATER RESOURCES                     | $1.85 \pm 0.04$                   | $0.78 \pm 0.00$                   | 17.63               | 3,904          |
| ZOOLOGY                             | $2.06 \pm 0.03$                   | $0.78 \pm 0.00$                   | 19.21               | 4,986          |
| <b>TOTAL</b>                        | <b><math>1.00 \pm 0.00</math></b> | <b><math>1.00 \pm 0.00</math></b> | <b>22.97</b>        | <b>856,556</b> |

Table S28: Publication year 1995.

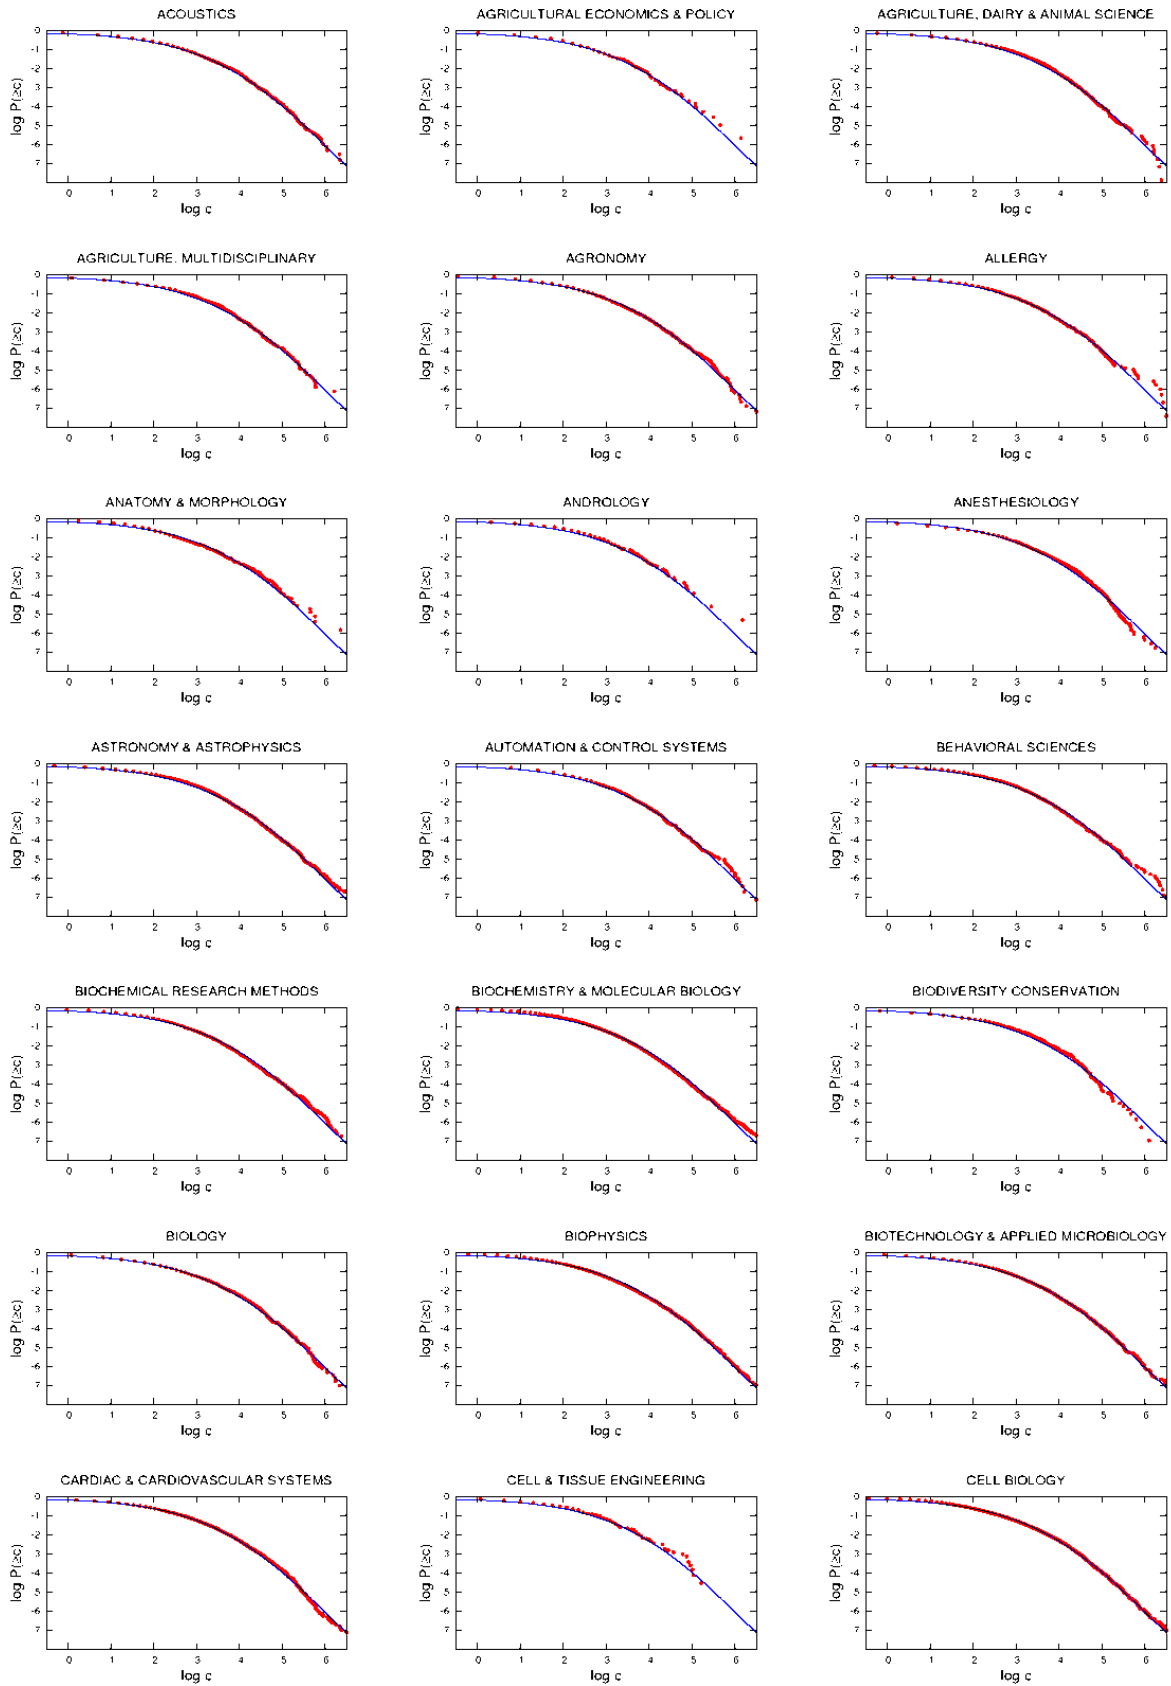

Figure S67: Publication year 1995.

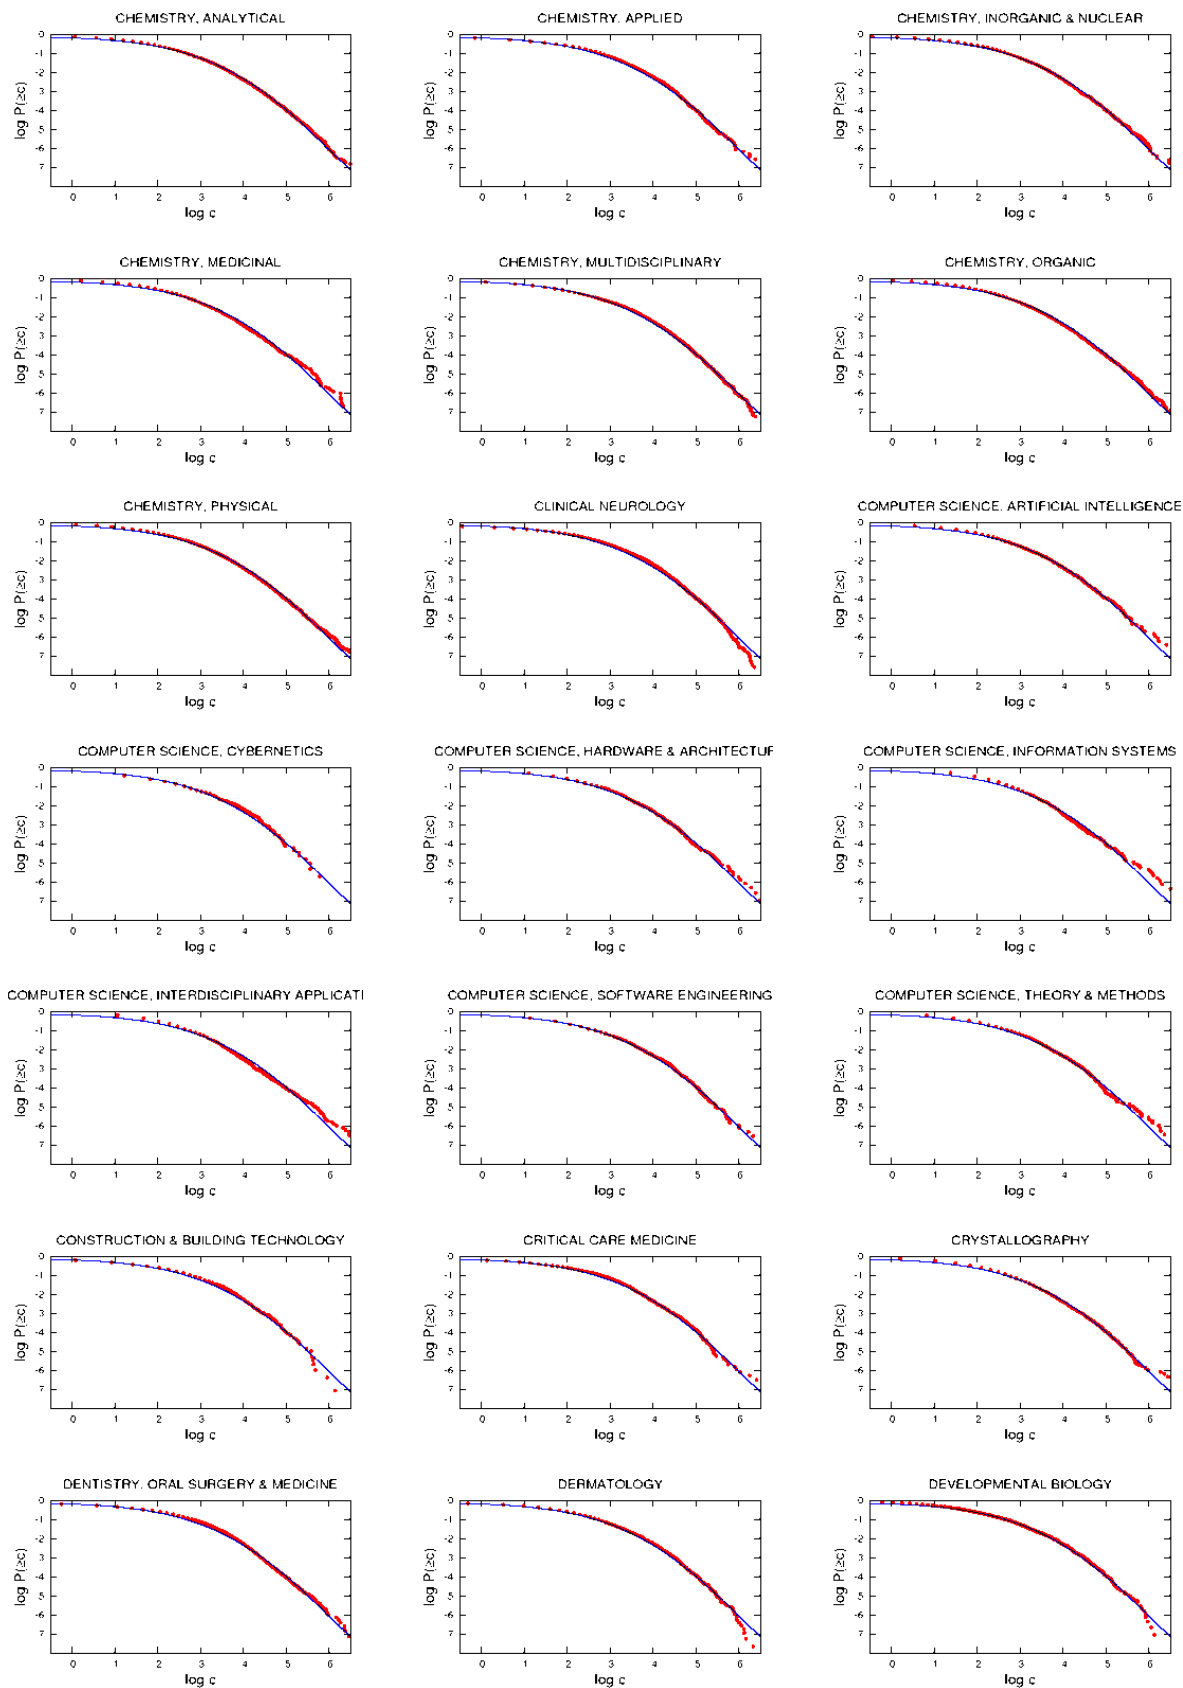

Figure S68: Publication year 1995.

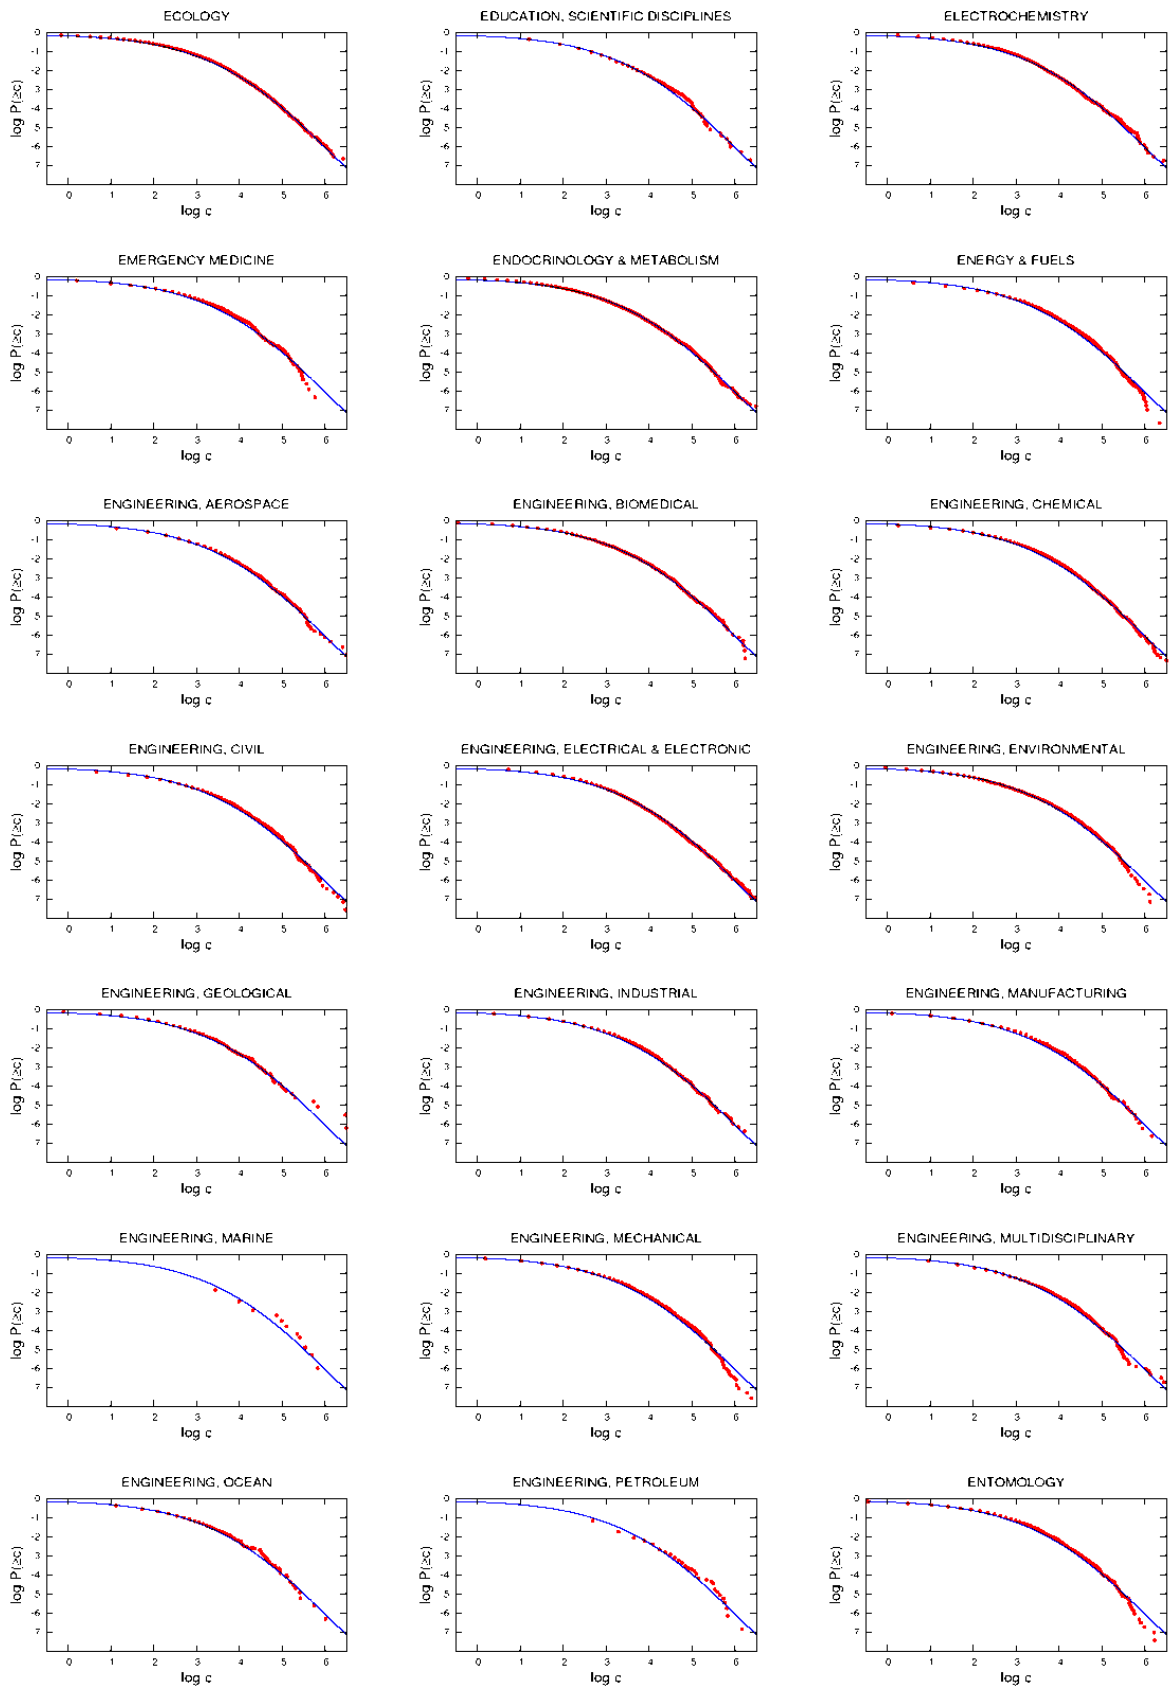

Figure S69: Publication year 1995.



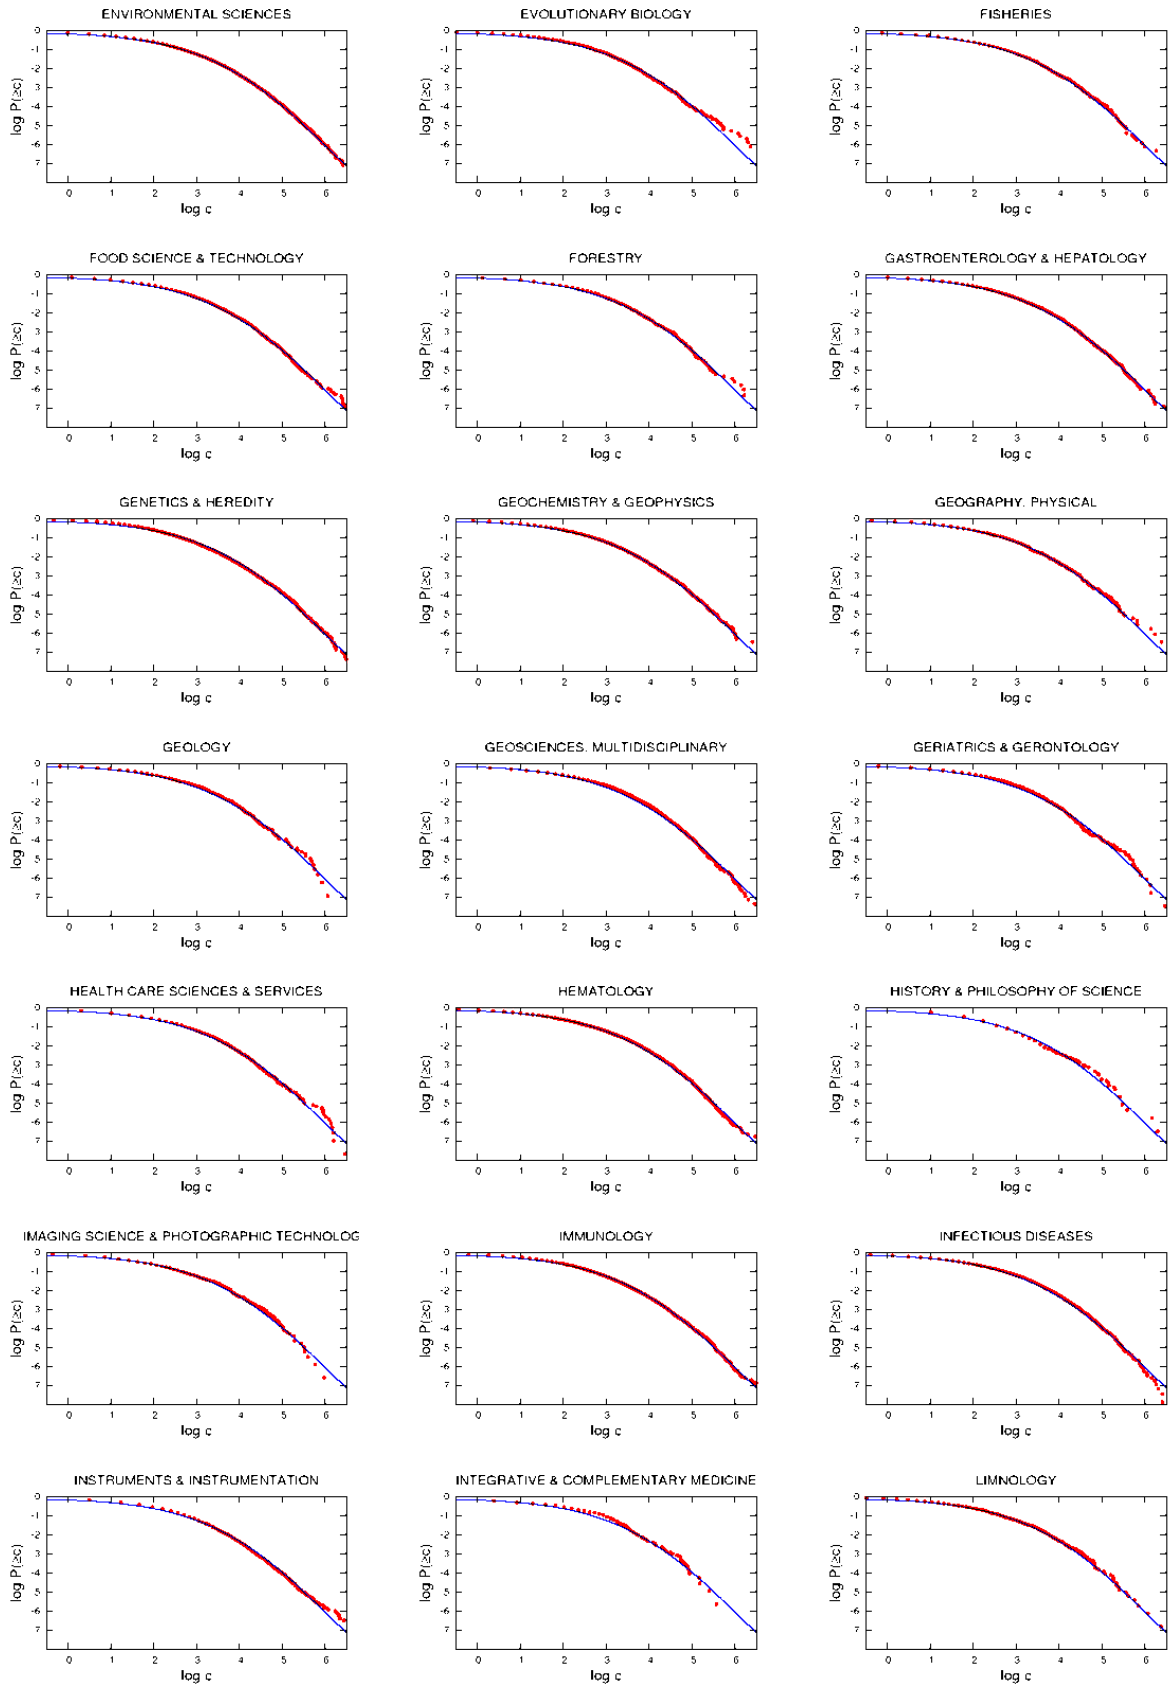

Figure S70: Publication year 1995.

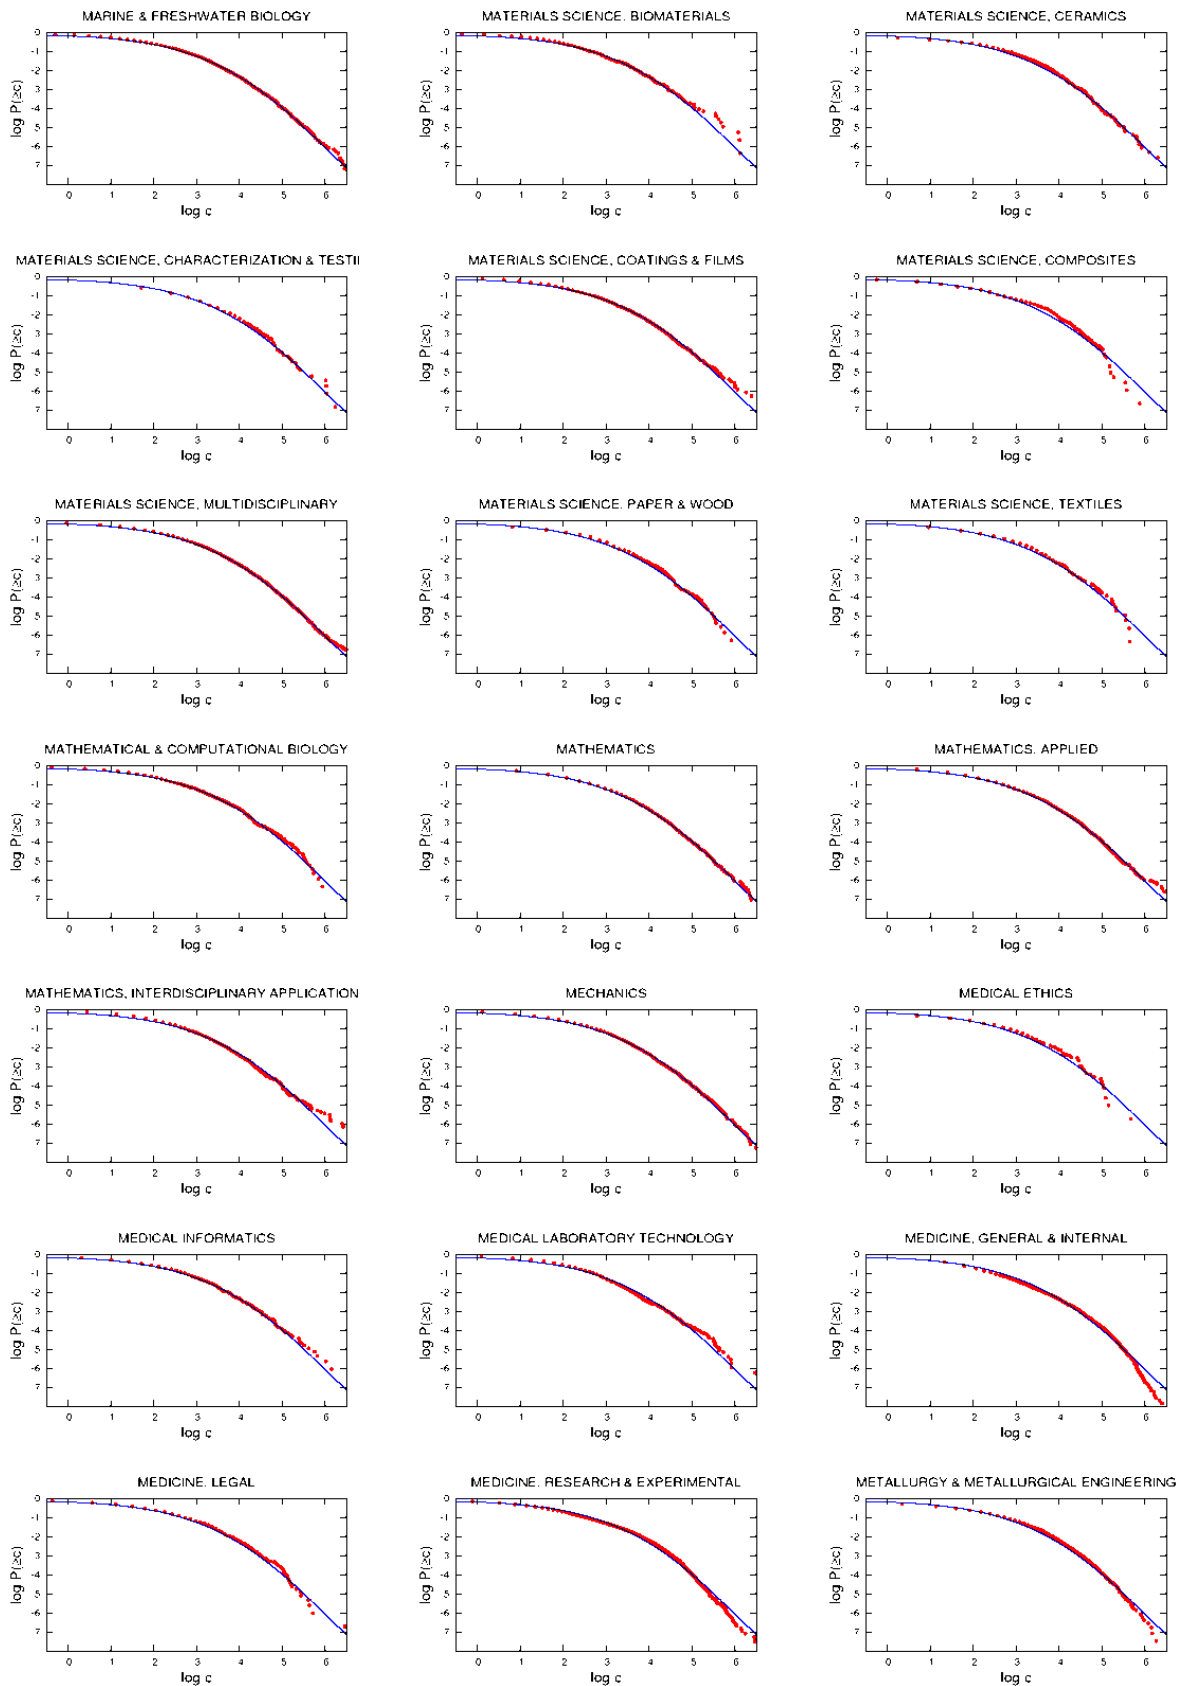

Figure S71: Publication year 1995.

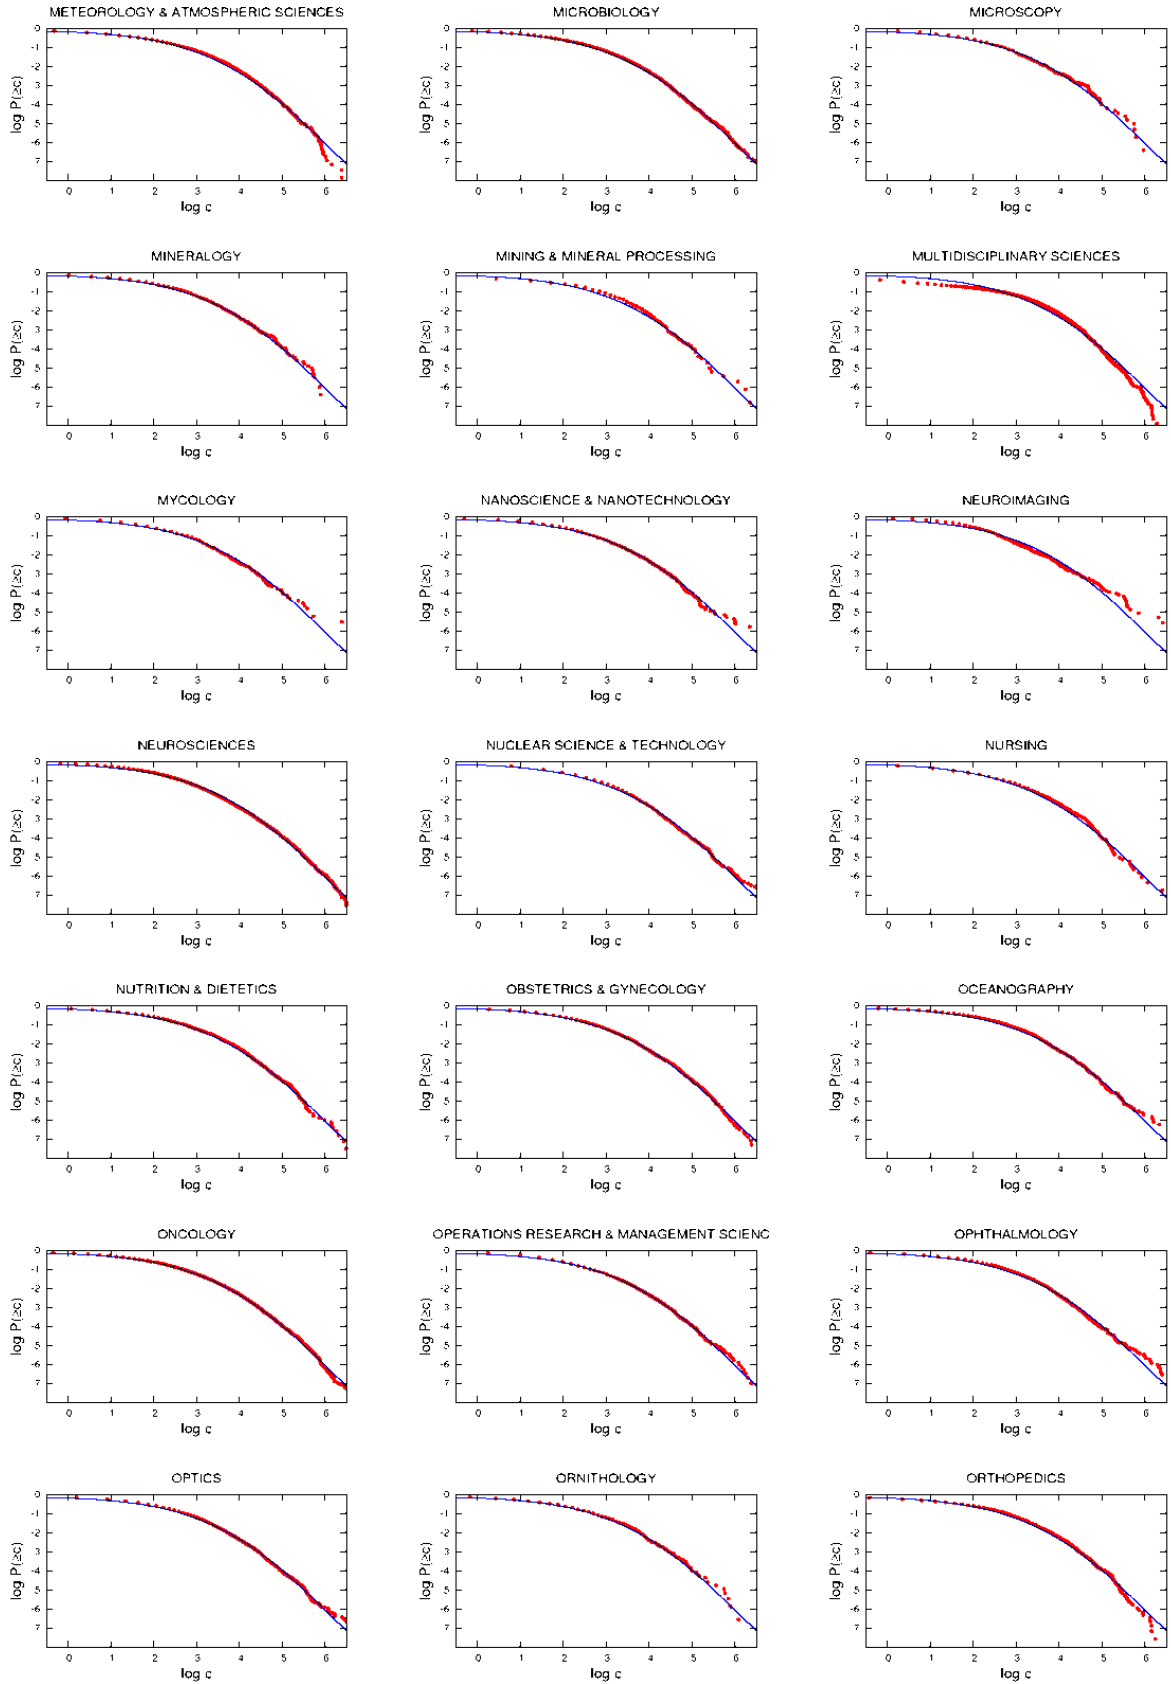

Figure S72: Publication year 1995.

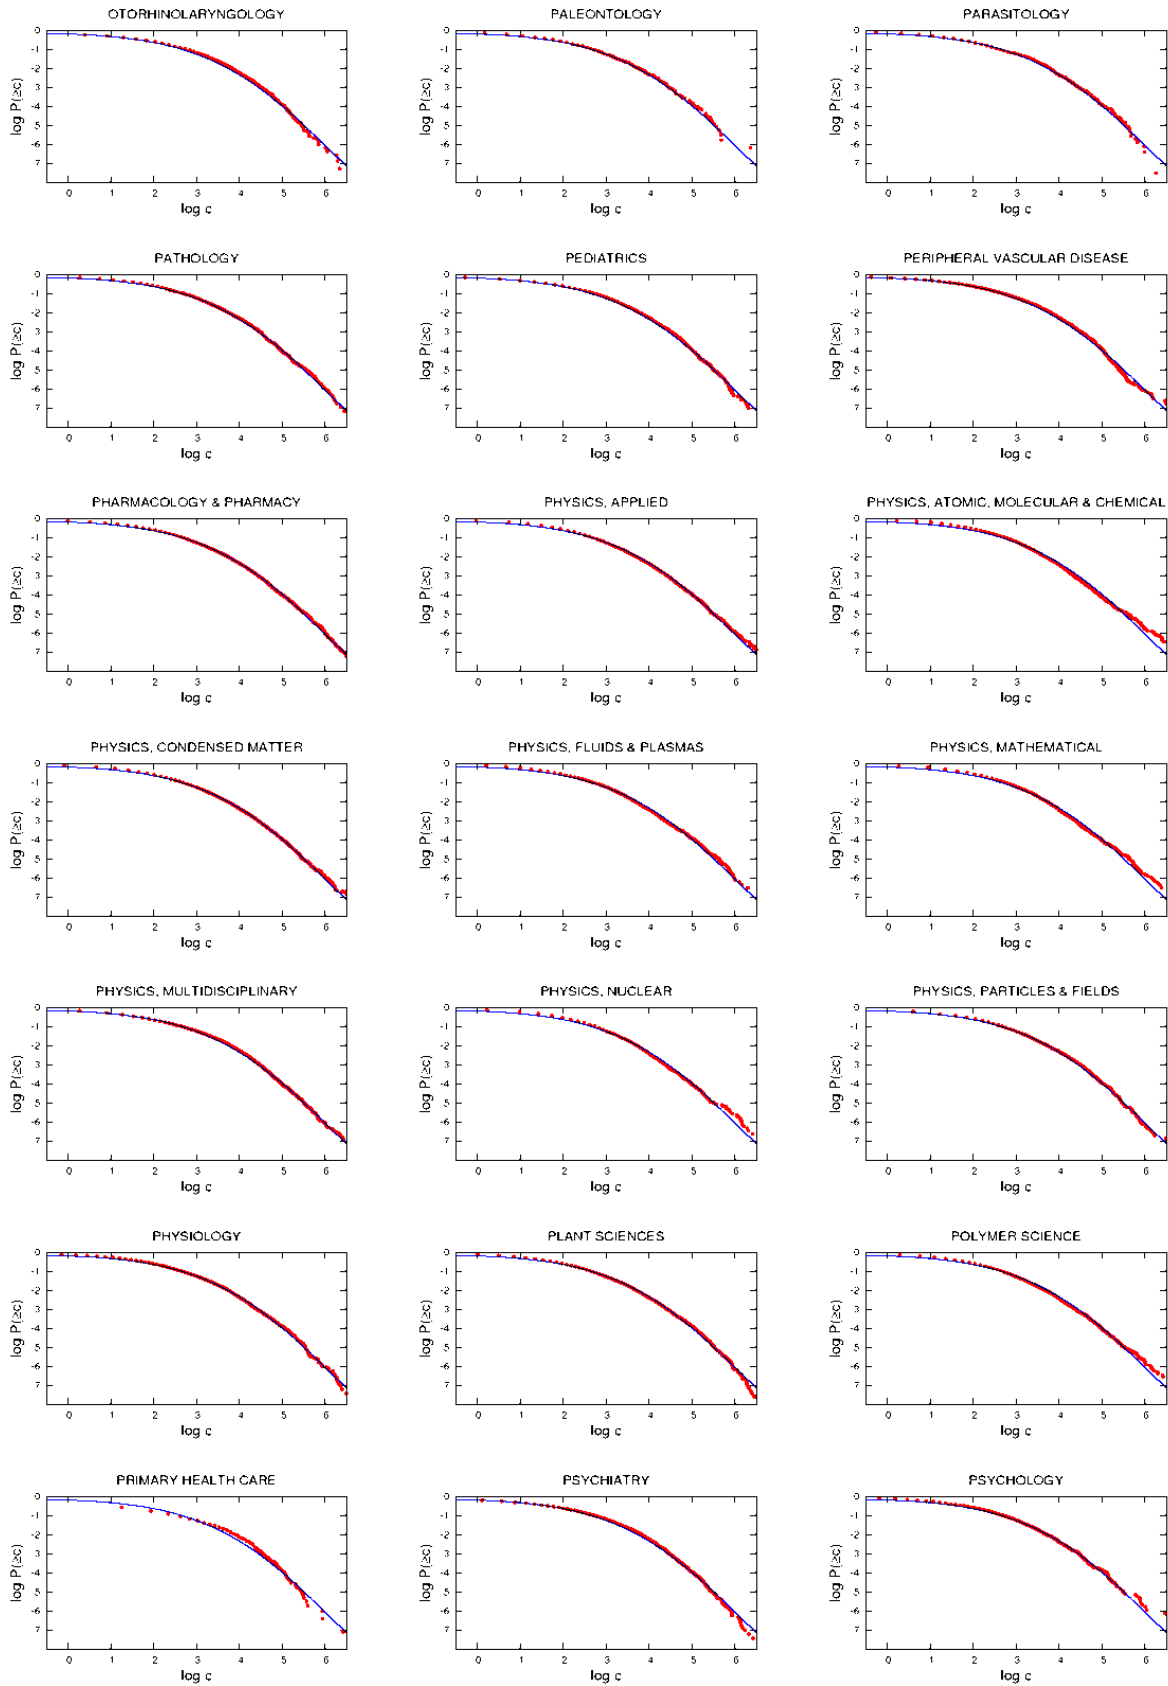

Figure S73: Publication year 1995.

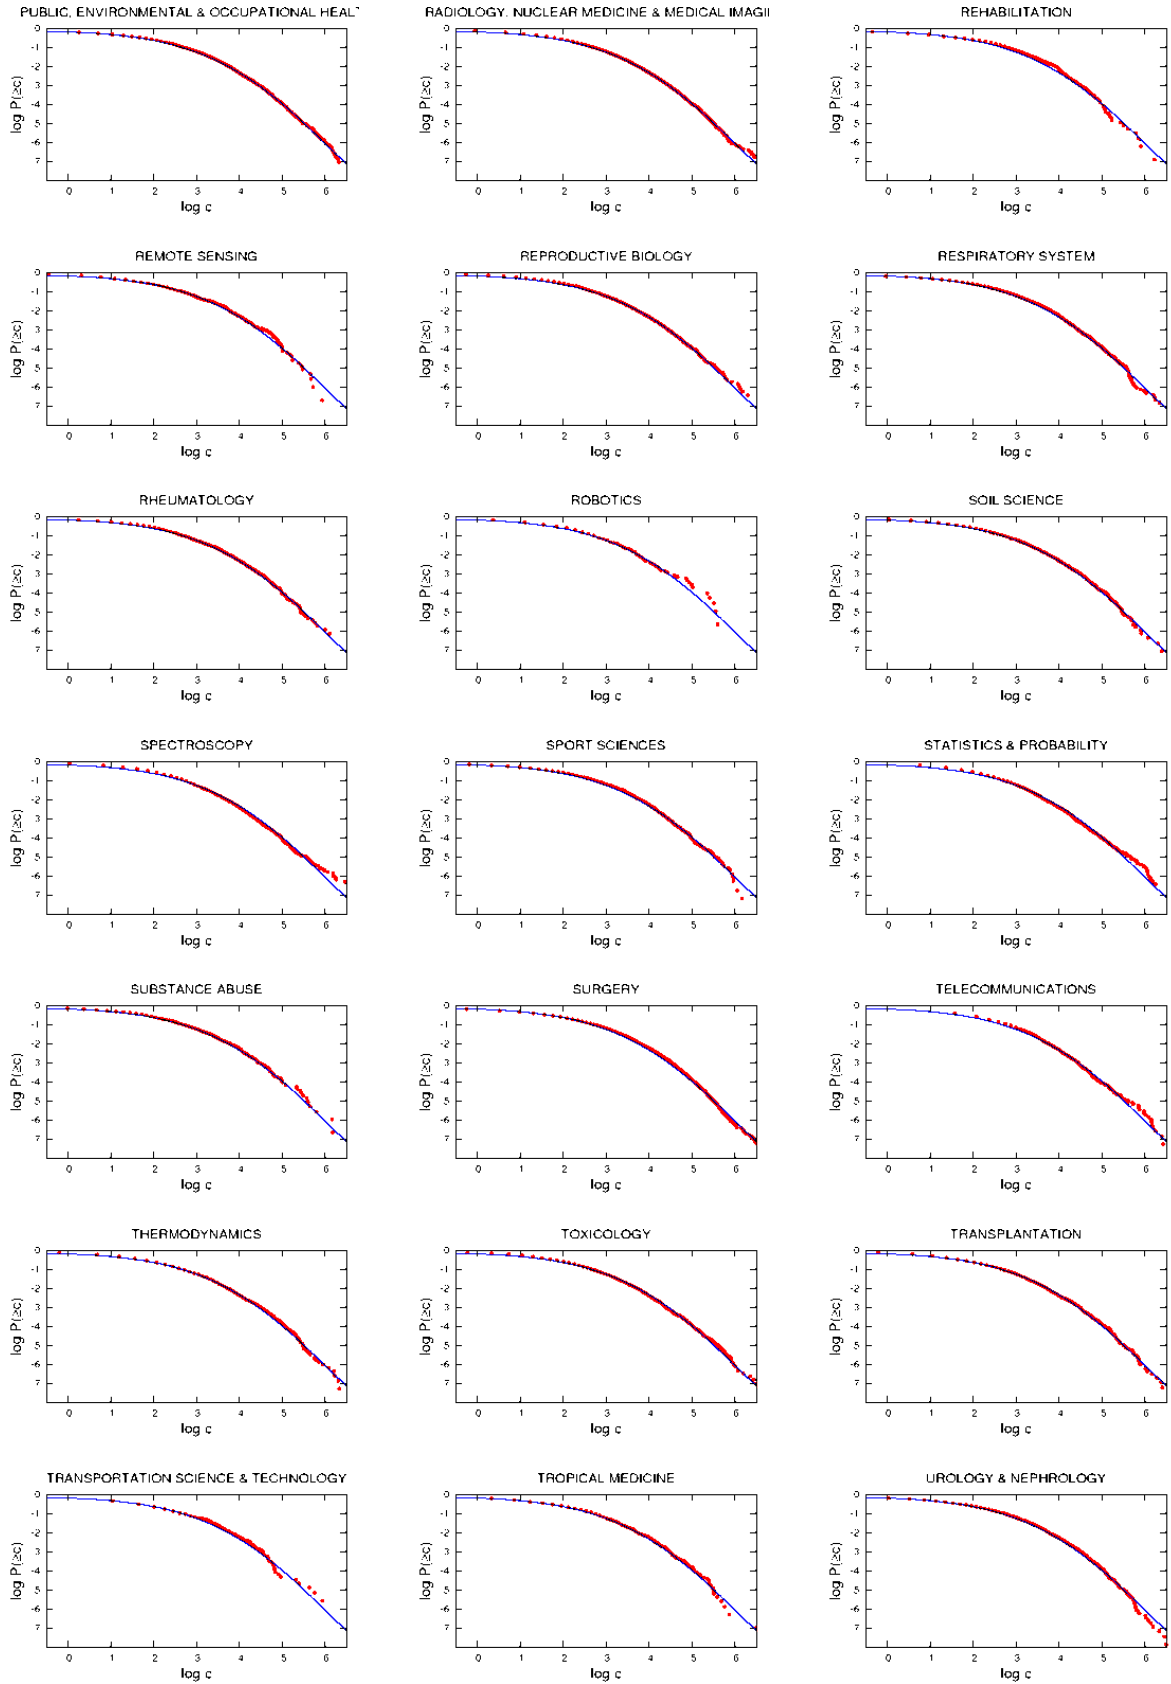

Figure S74: Publication year 1995.

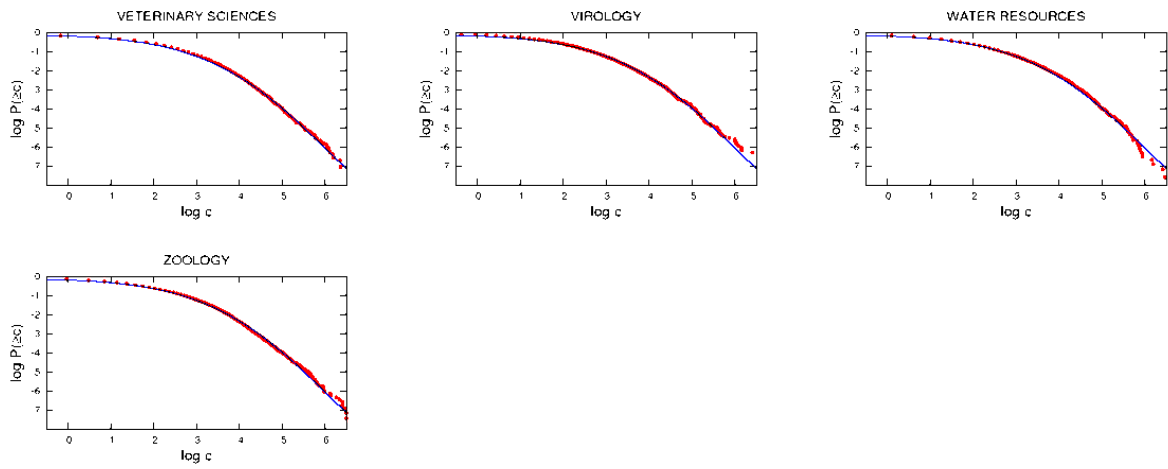

Figure S75: Publication year 1995.

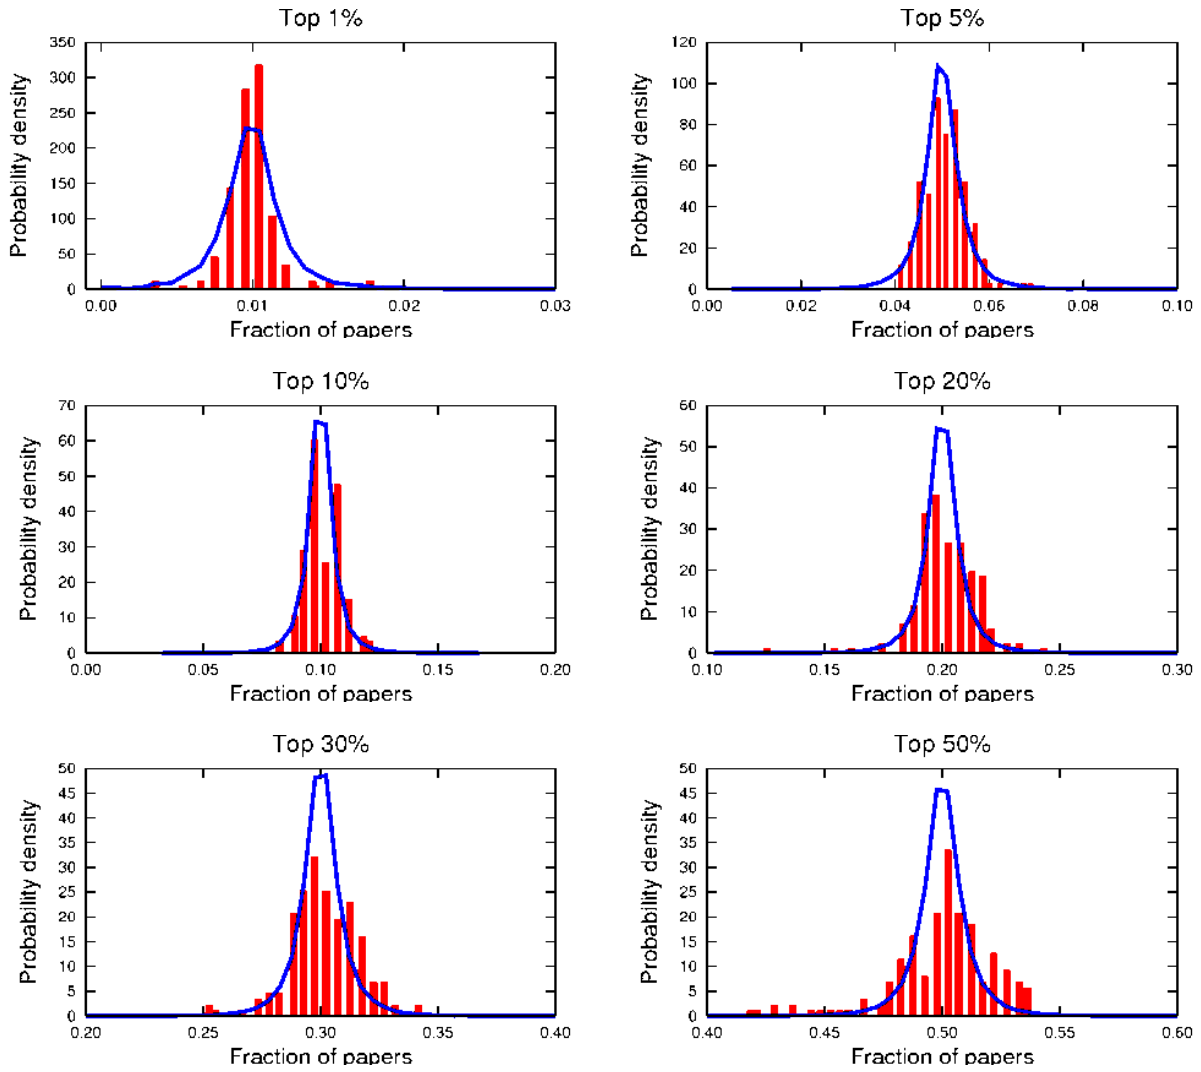

Figure S76: Publication year 1995.
