# Supplementary material for: A Reverse Engineering Approach to the Suppression of Citation Biases Reveals Universal Properties of Citation Distributions
Source: PubMed Central journal article supplement (PMC3315498; doi:10.1371/journal.pone.0033833), 2012-03-29
Supplement: pone.0033833.s006.pdf [file pone.0033833.s006.pdf]

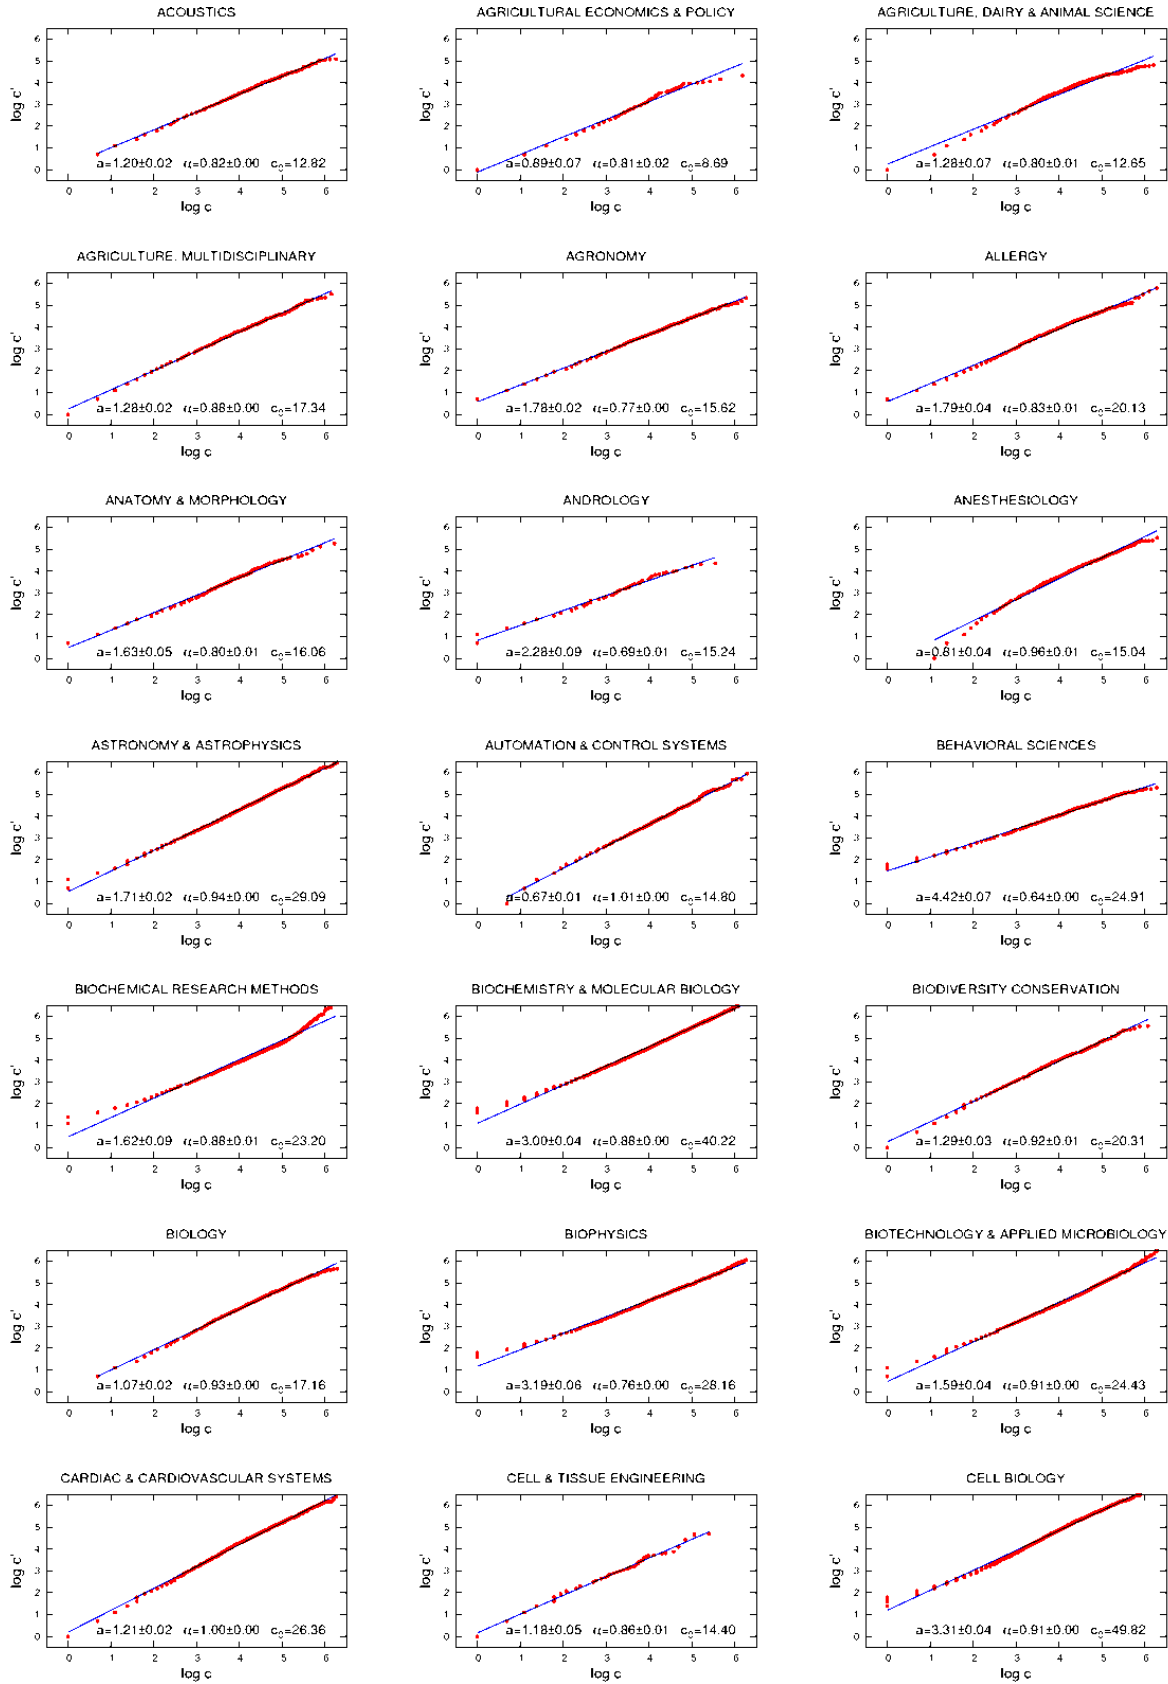

Figure S77: Publication year 1999.

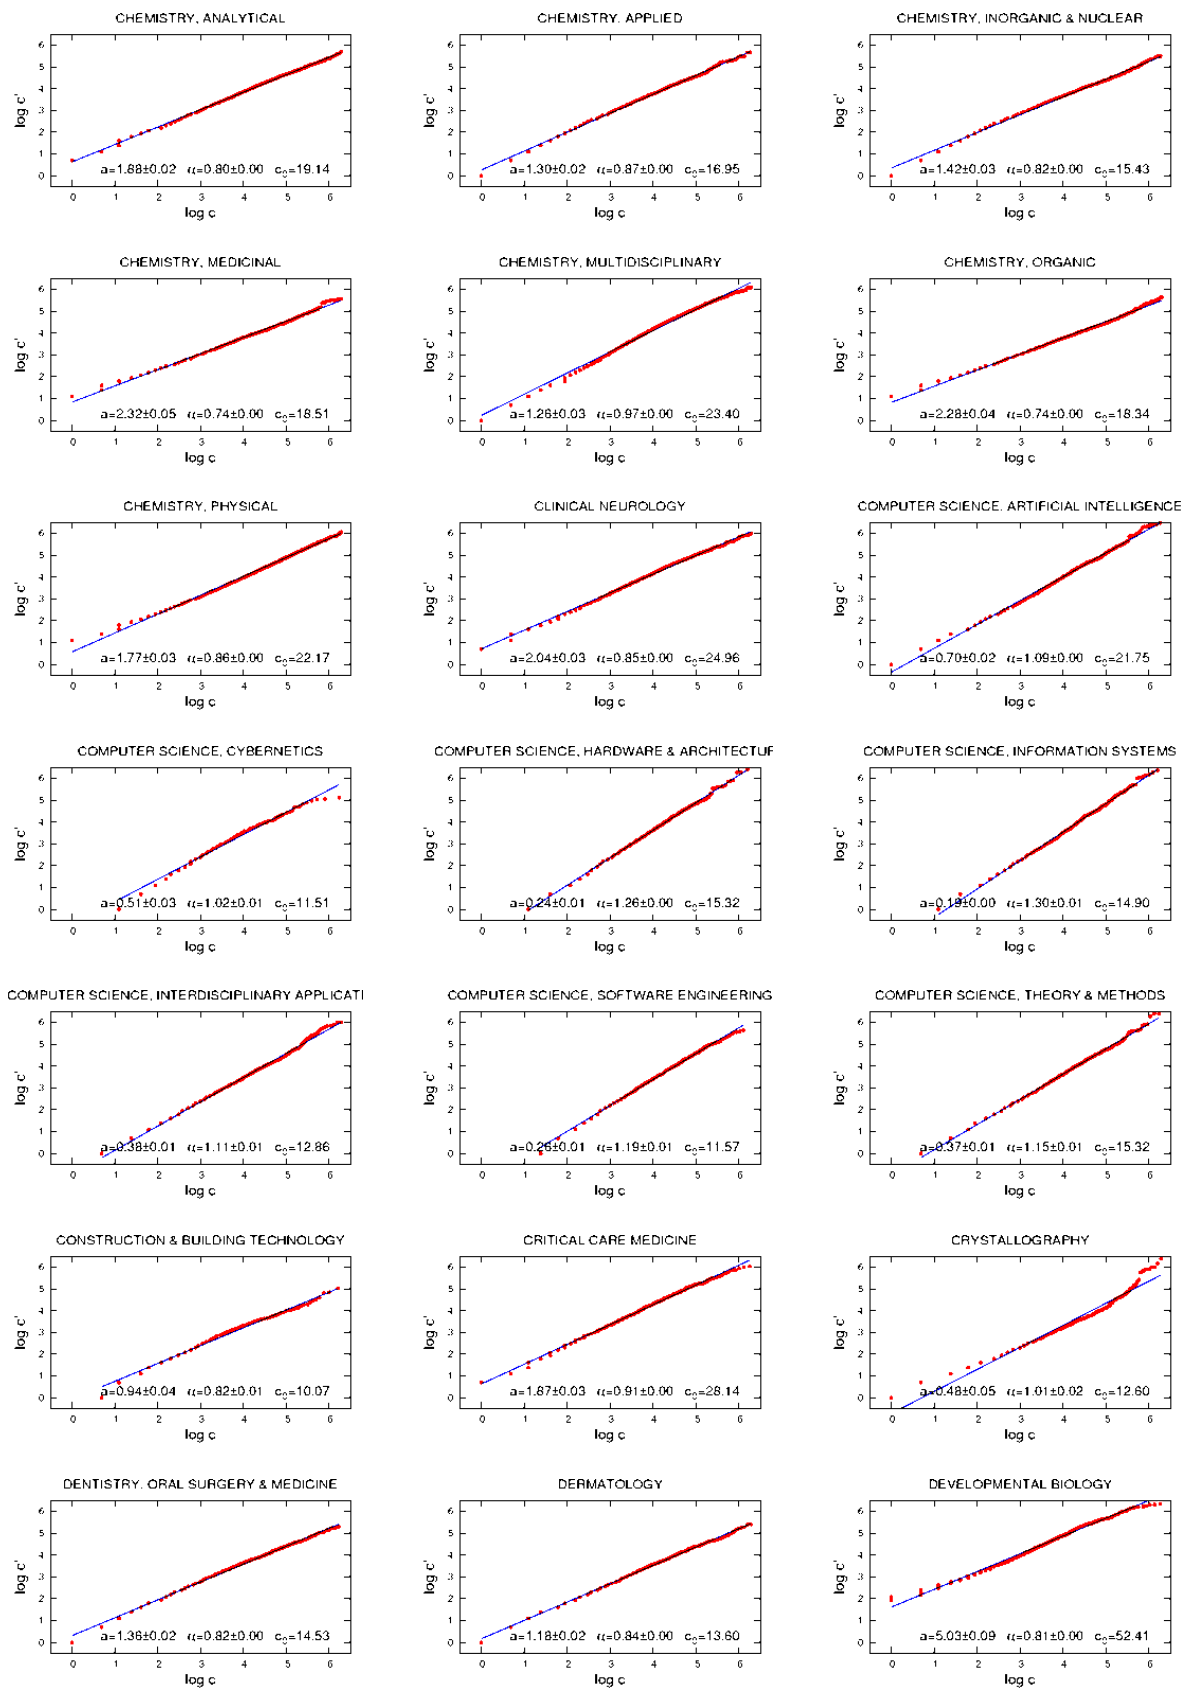

Figure S78: Publication year 1999.

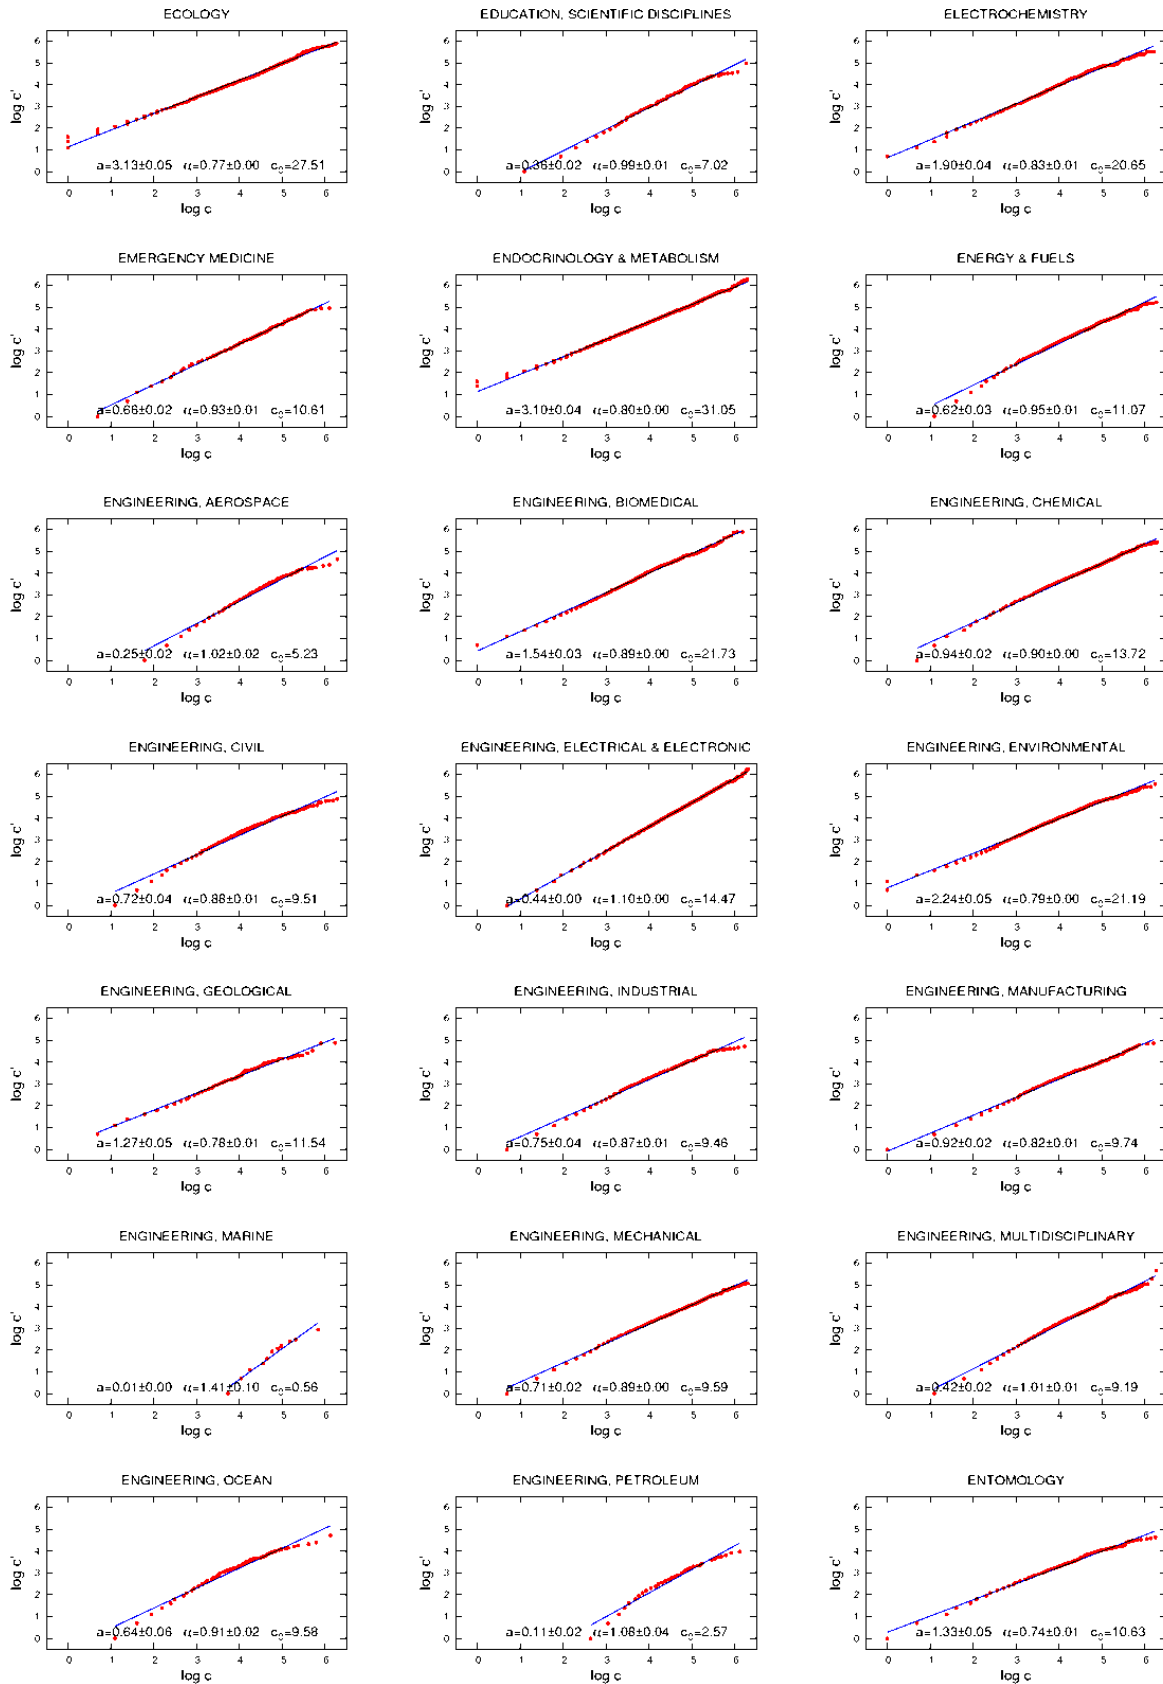

Figure S79: Publication year 1999.

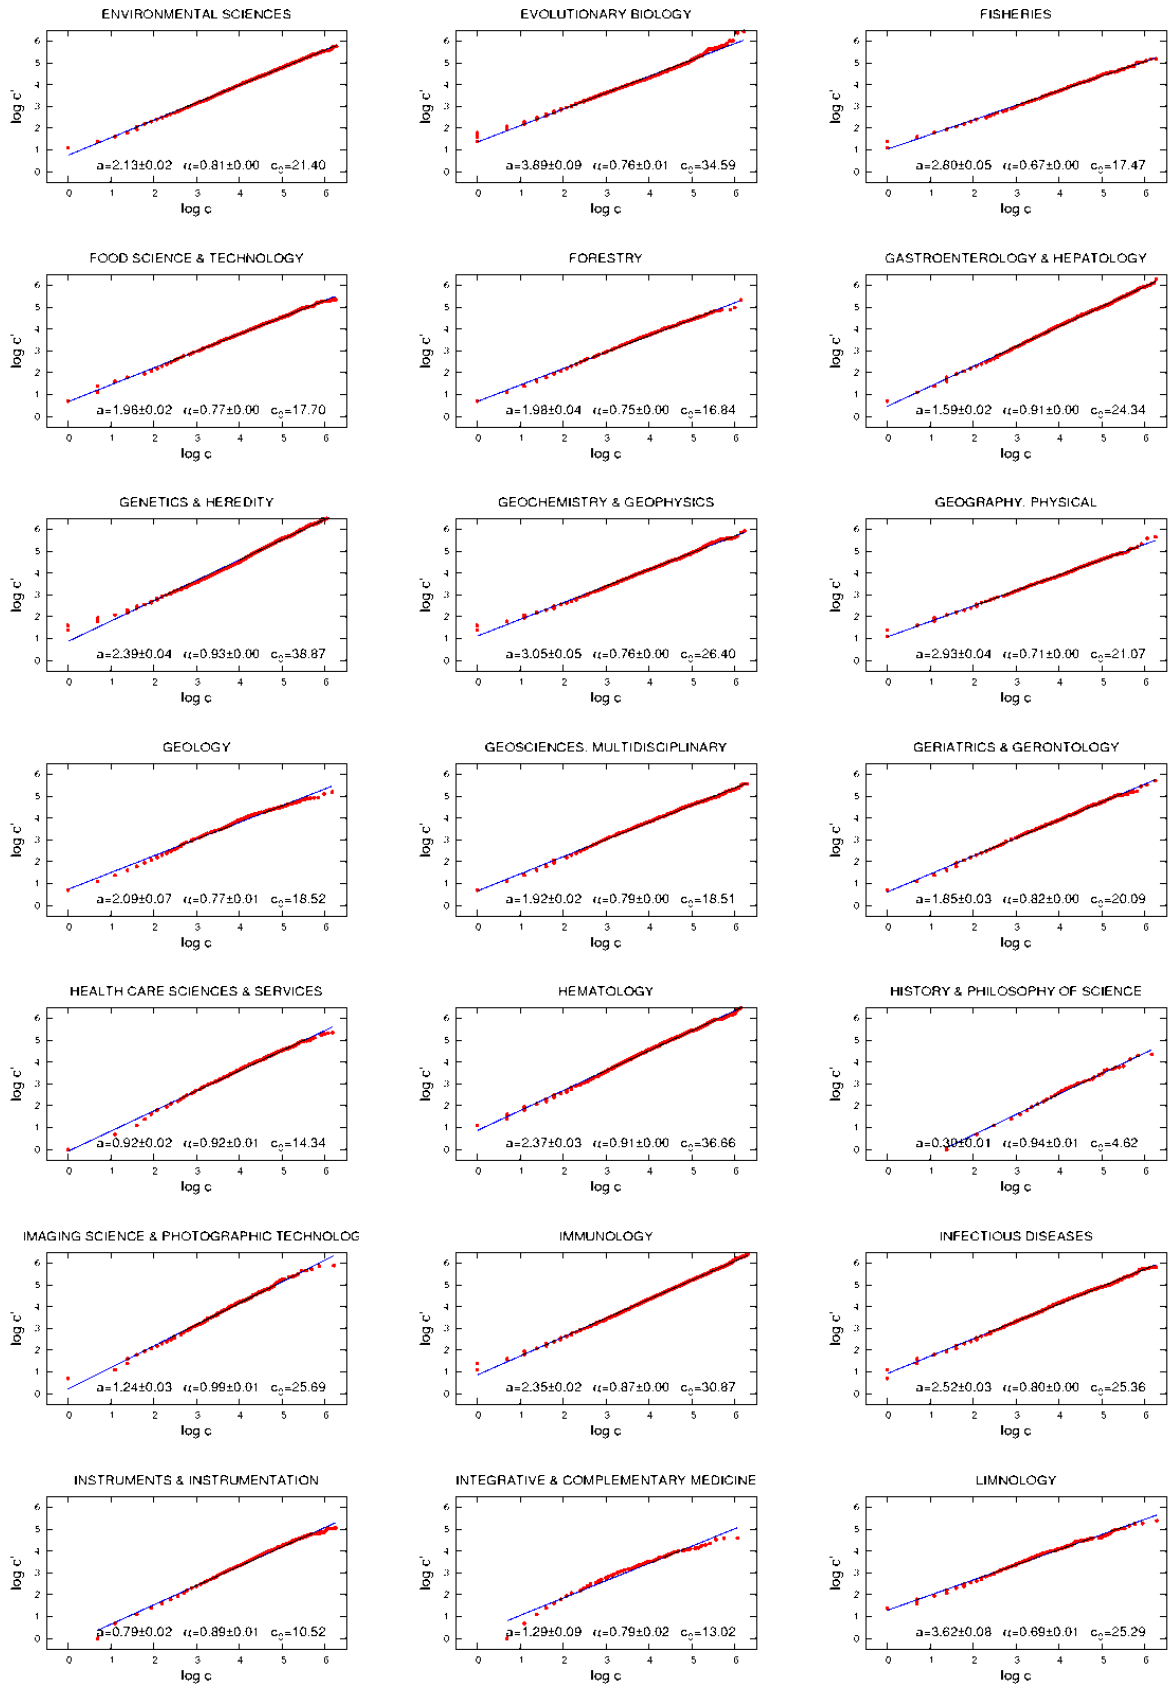

Figure S80: Publication year 1999.

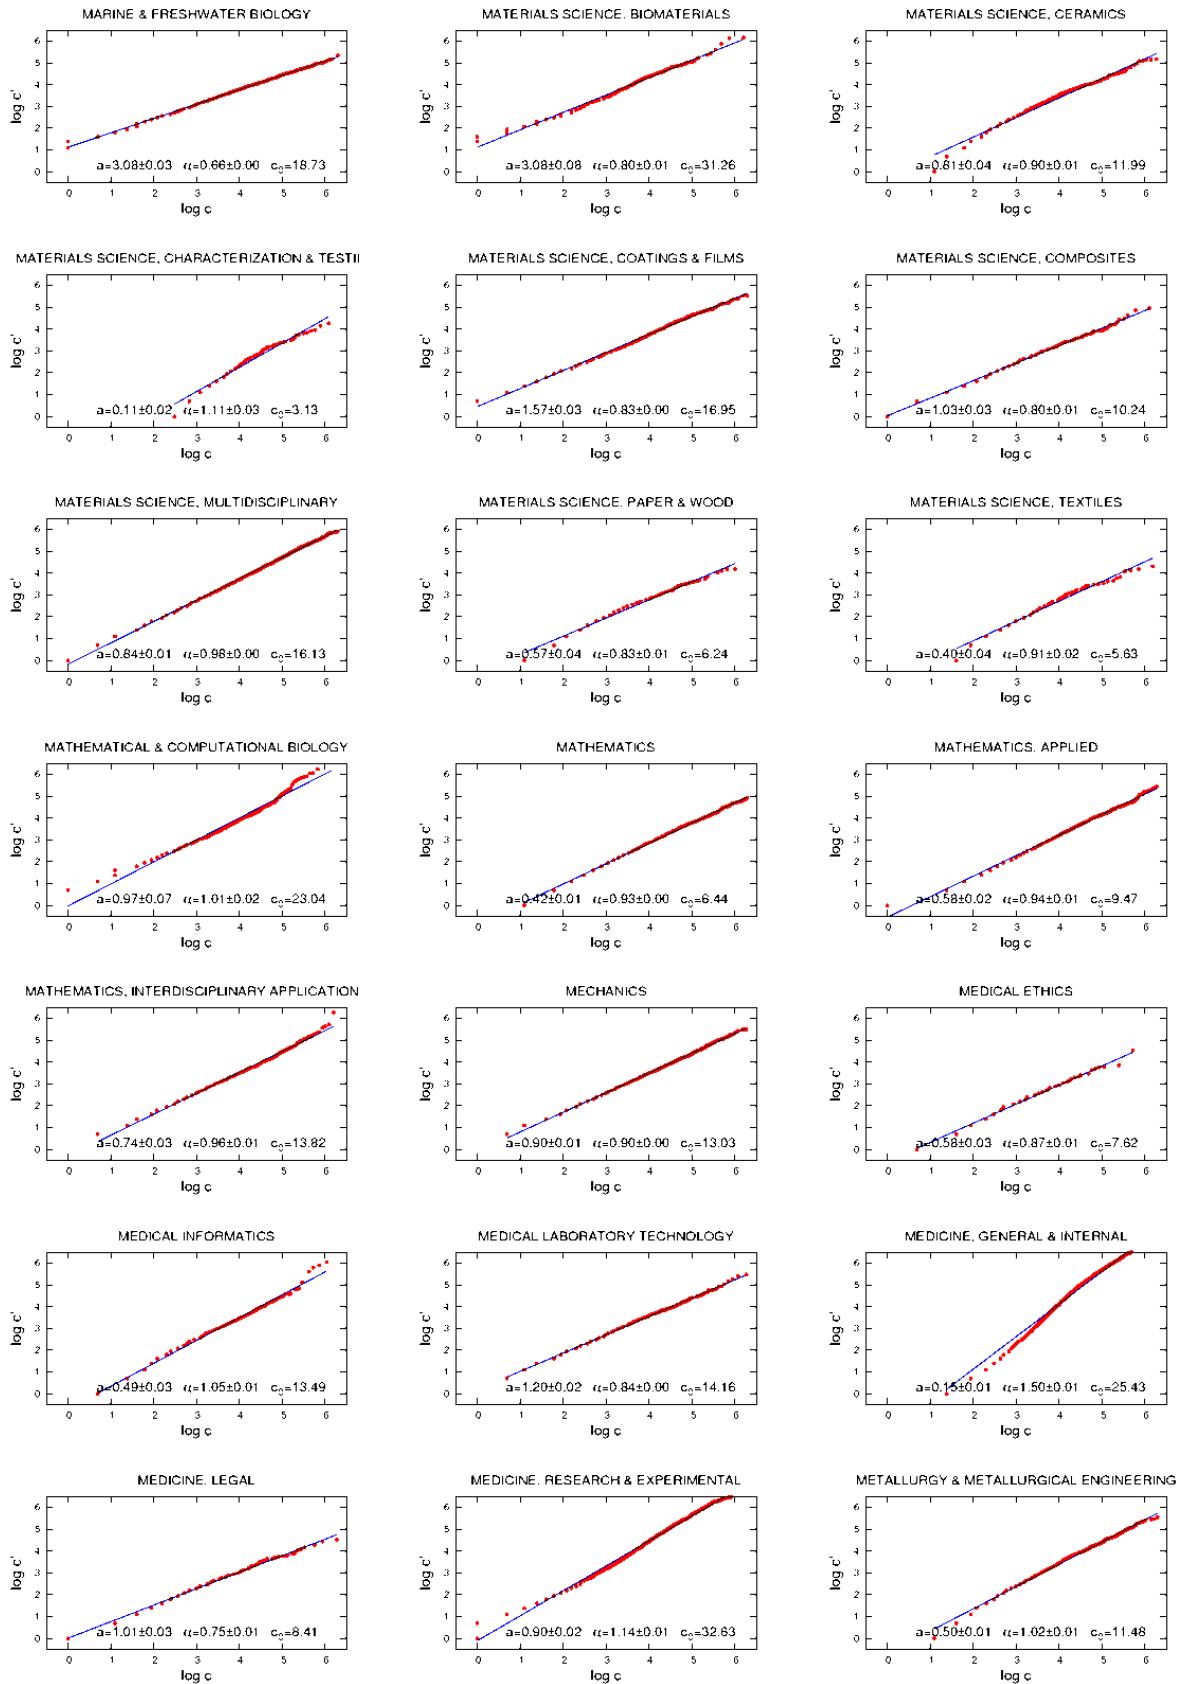

Figure S81: Publication year 1999.

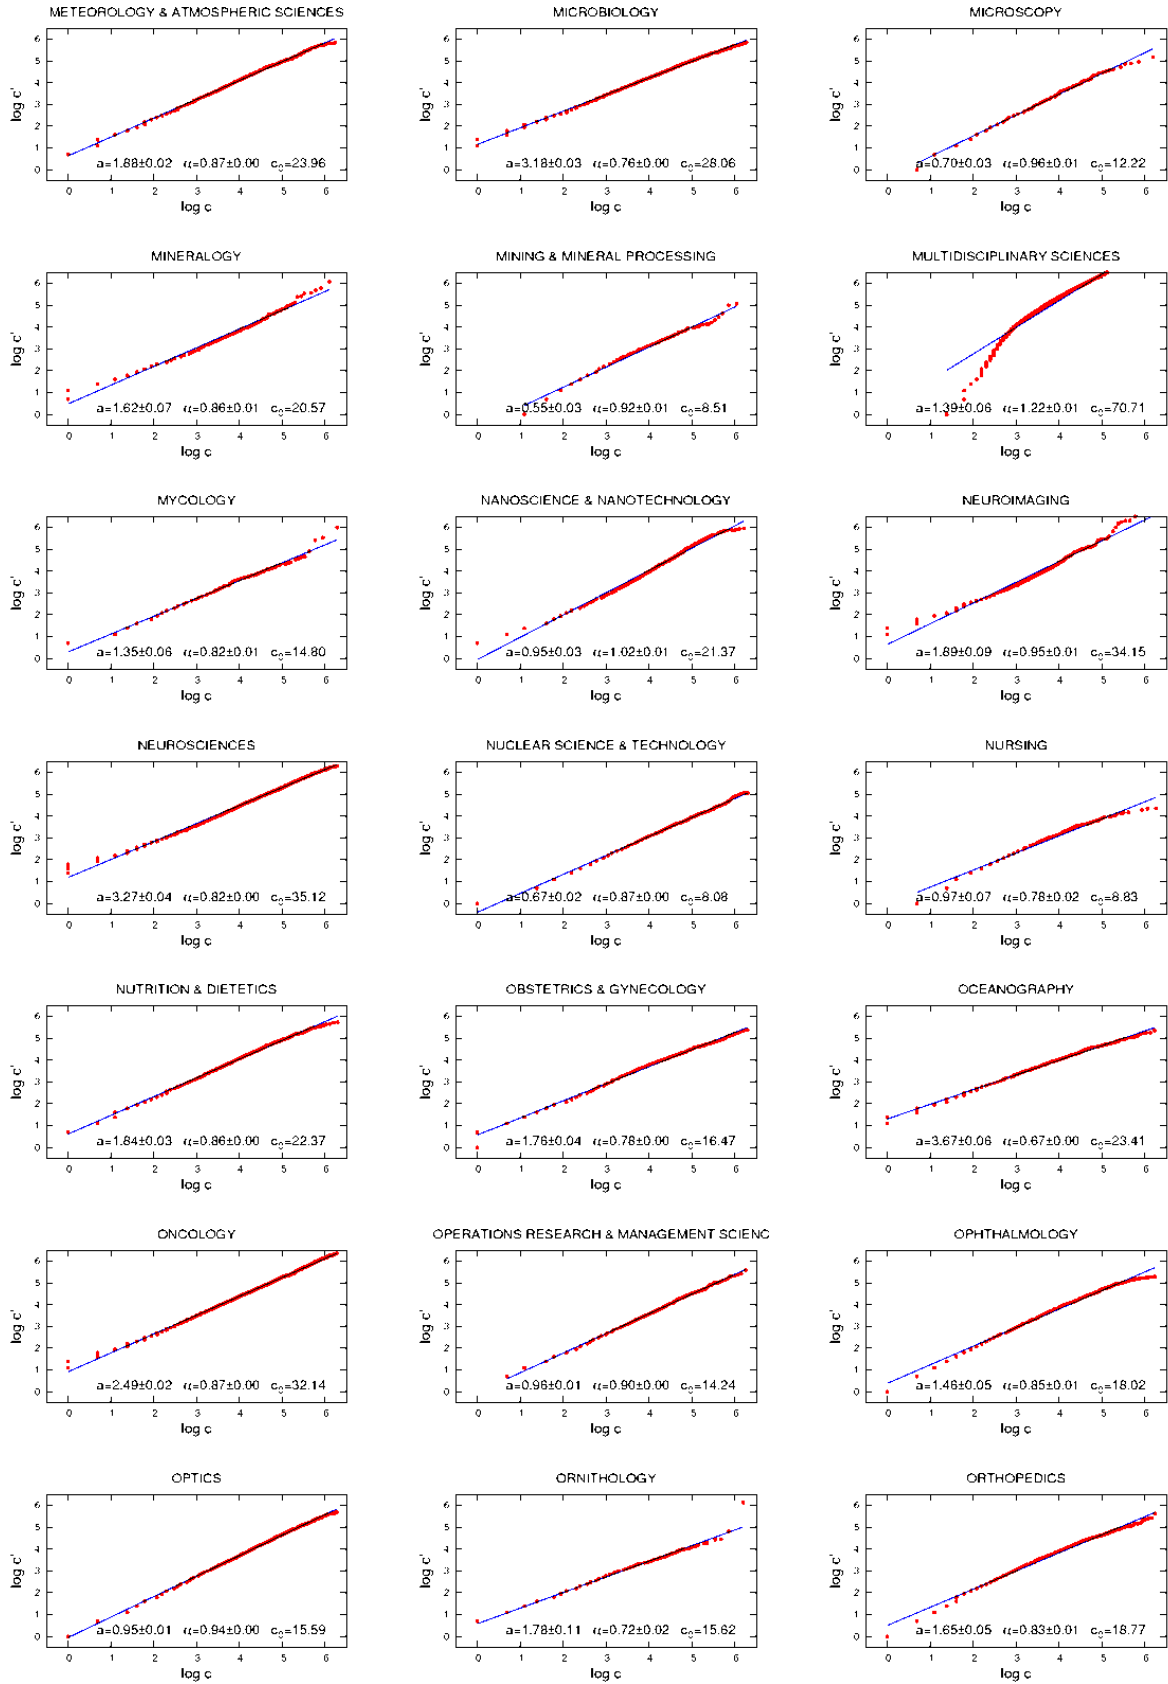

Figure S82: Publication year 1999.

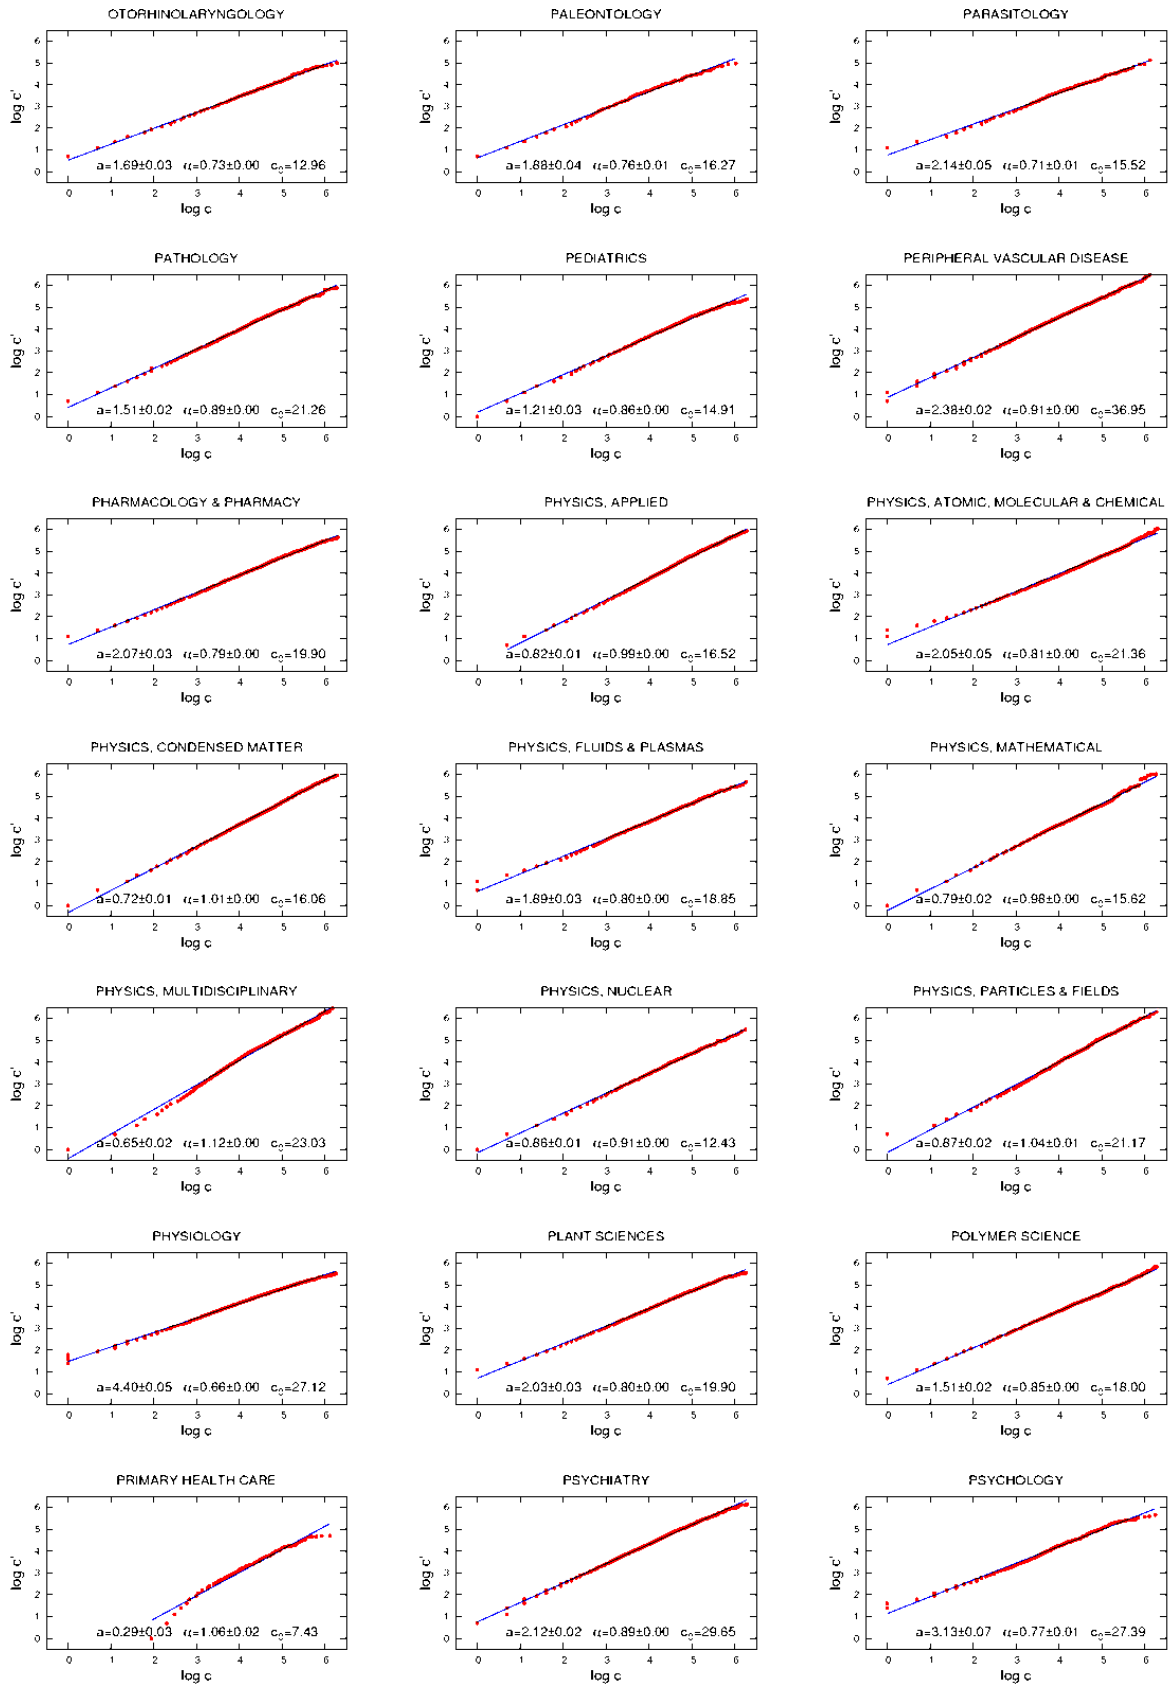

Figure S83: Publication year 1999.

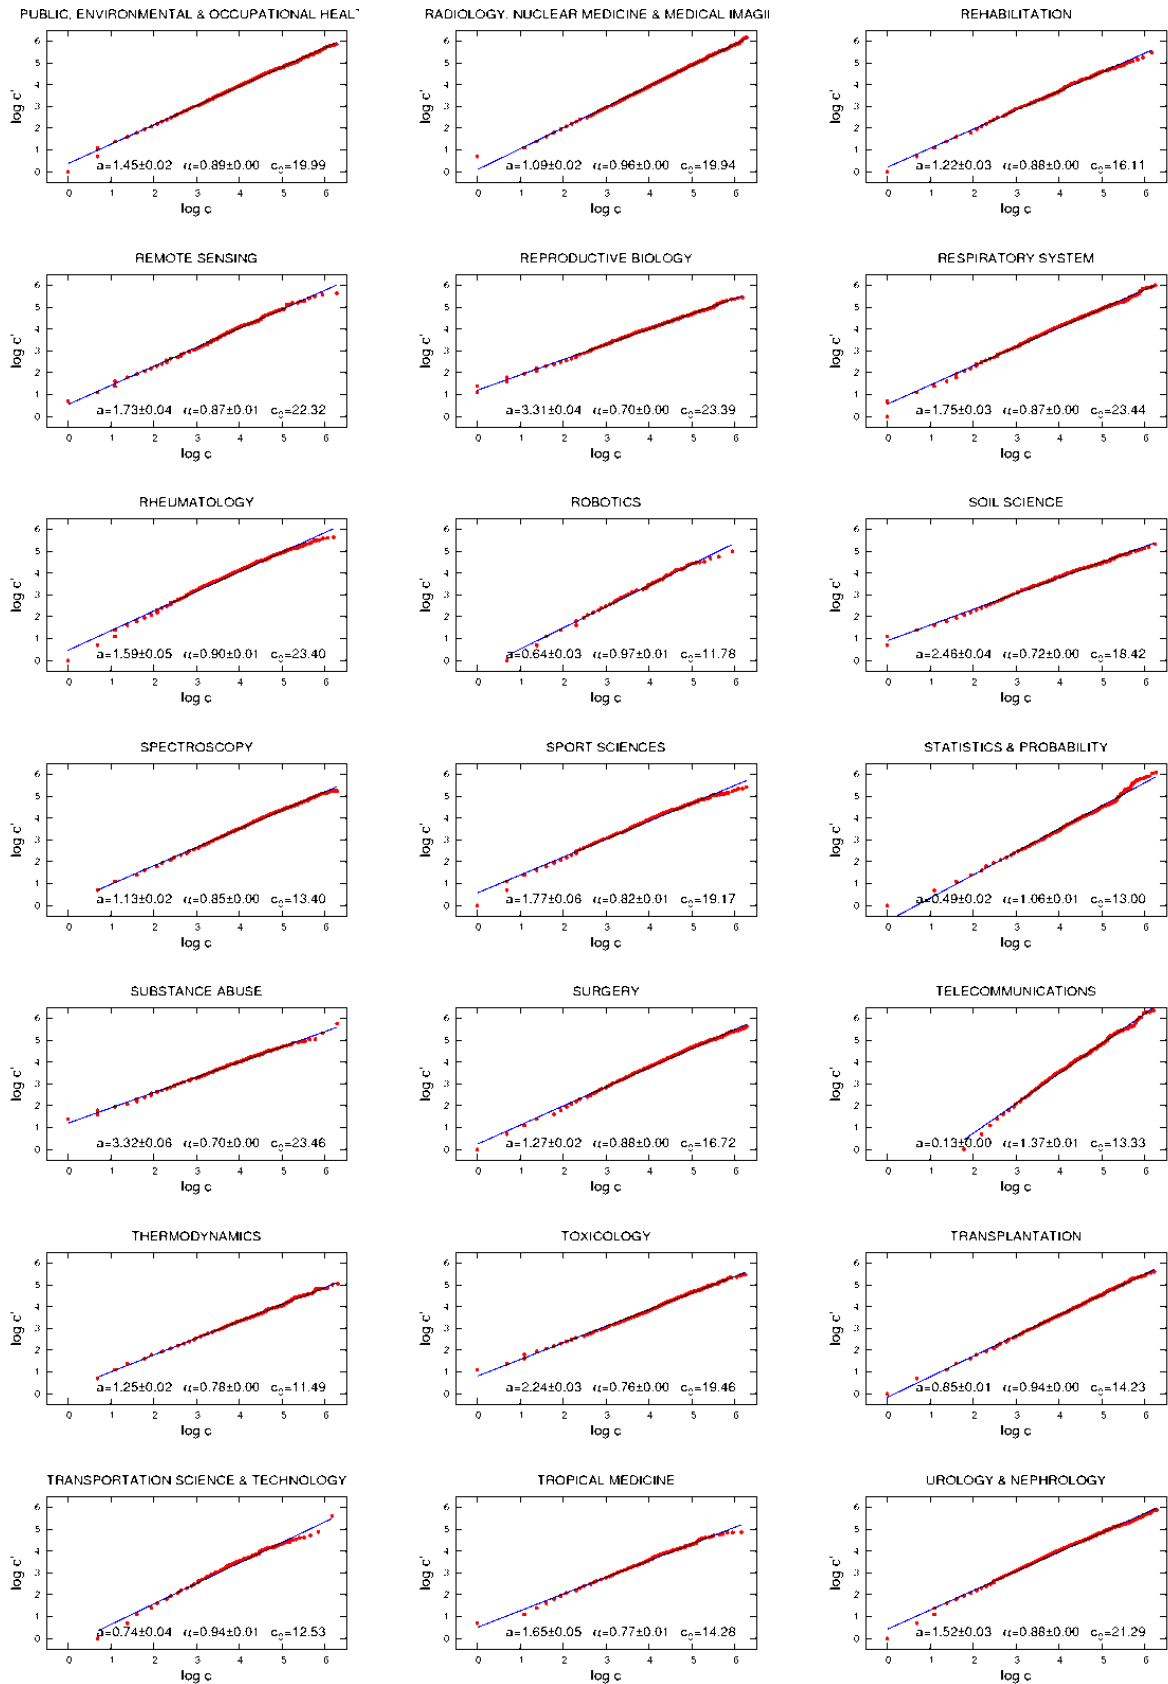

Figure S84: Publication year 1999.



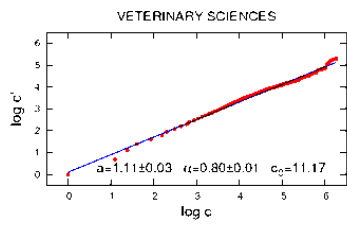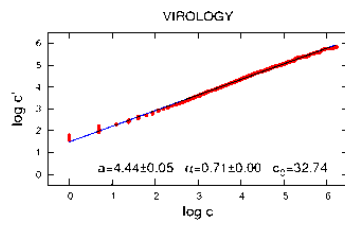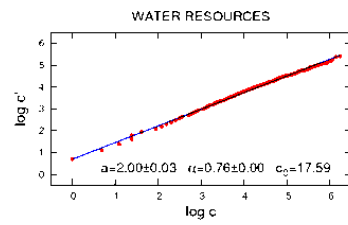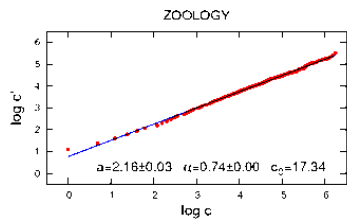

Figure S85: Publication year 1999.

| Subject-category                                 | $a$         | $\alpha$    | $\langle c \rangle$ | $N$    |
|--------------------------------------------------|-------------|-------------|---------------------|--------|
| ACOUSTICS                                        | 1.20 ± 0.02 | 0.82 ± 0.00 | 12.82               | 2,670  |
| AGRICULTURAL ECONOMICS & POLICY                  | 0.89 ± 0.07 | 0.81 ± 0.02 | 8.69                | 750    |
| AGRICULTURE, DAIRY & ANIMAL SCIENCE              | 1.28 ± 0.07 | 0.80 ± 0.01 | 12.65               | 3,202  |
| AGRICULTURE, MULTIDISCIPLINARY                   | 1.28 ± 0.02 | 0.88 ± 0.00 | 17.34               | 2,142  |
| AGRONOMY                                         | 1.78 ± 0.02 | 0.77 ± 0.00 | 15.62               | 3,634  |
| ALLERGY                                          | 1.79 ± 0.04 | 0.83 ± 0.01 | 20.13               | 1,918  |
| ANATOMY & MORPHOLOGY                             | 1.63 ± 0.05 | 0.80 ± 0.01 | 16.06               | 826    |
| ANDROLOGY                                        | 2.28 ± 0.09 | 0.69 ± 0.01 | 15.24               | 195    |
| ANESTHESIOLOGY                                   | 0.81 ± 0.04 | 0.96 ± 0.01 | 15.04               | 3,799  |
| ASTRONOMY & ASTROPHYSICS                         | 1.71 ± 0.02 | 0.94 ± 0.00 | 29.09               | 9,644  |
| AUTOMATION & CONTROL SYSTEMS                     | 0.67 ± 0.01 | 1.01 ± 0.00 | 14.80               | 2,886  |
| BEHAVIORAL SCIENCES                              | 4.42 ± 0.07 | 0.64 ± 0.00 | 24.91               | 2,792  |
| BIOCHEMICAL RESEARCH METHODS                     | 1.62 ± 0.09 | 0.88 ± 0.01 | 23.20               | 6,189  |
| BIOCHEMISTRY & MOLECULAR BIOLOGY                 | 3.00 ± 0.04 | 0.88 ± 0.00 | 40.22               | 37,591 |
| BIODIVERSITY CONSERVATION                        | 1.29 ± 0.03 | 0.92 ± 0.01 | 20.31               | 1,227  |
| BIOLOGY                                          | 1.07 ± 0.02 | 0.93 ± 0.00 | 17.16               | 4,782  |
| BIOPHYSICS                                       | 3.19 ± 0.06 | 0.76 ± 0.00 | 28.16               | 8,133  |
| BIOTECHNOLOGY & APPLIED MICROBIOLOGY             | 1.59 ± 0.04 | 0.91 ± 0.00 | 24.43               | 11,328 |
| CARDIAC & CARDIOVASCULAR SYSTEMS                 | 1.21 ± 0.02 | 1.00 ± 0.00 | 26.36               | 11,097 |
| CELL & TISSUE ENGINEERING                        | 1.18 ± 0.05 | 0.86 ± 0.01 | 14.40               | 144    |
| CELL BIOLOGY                                     | 3.31 ± 0.04 | 0.91 ± 0.00 | 49.82               | 16,484 |
| CHEMISTRY, ANALYTICAL                            | 1.88 ± 0.02 | 0.80 ± 0.00 | 19.14               | 11,698 |
| CHEMISTRY, APPLIED                               | 1.30 ± 0.02 | 0.87 ± 0.00 | 16.95               | 5,485  |
| CHEMISTRY, INORGANIC & NUCLEAR                   | 1.42 ± 0.03 | 0.82 ± 0.00 | 15.43               | 8,348  |
| CHEMISTRY, MEDICINAL                             | 2.32 ± 0.05 | 0.74 ± 0.00 | 18.51               | 4,742  |
| CHEMISTRY, MULTIDISCIPLINARY                     | 1.26 ± 0.03 | 0.97 ± 0.00 | 23.40               | 17,292 |
| CHEMISTRY, ORGANIC                               | 2.28 ± 0.04 | 0.74 ± 0.00 | 18.34               | 13,773 |
| CHEMISTRY, PHYSICAL                              | 1.77 ± 0.03 | 0.86 ± 0.00 | 22.17               | 22,527 |
| CLINICAL NEUROLOGY                               | 2.04 ± 0.03 | 0.85 ± 0.00 | 24.96               | 13,281 |
| COMPUTER SCIENCE, ARTIFICIAL INTELLIGENCE        | 0.70 ± 0.02 | 1.09 ± 0.00 | 21.75               | 3,680  |
| COMPUTER SCIENCE, CYBERNETICS                    | 0.51 ± 0.03 | 1.02 ± 0.01 | 11.51               | 855    |
| COMPUTER SCIENCE, HARDWARE & ARCHITECTURE        | 0.24 ± 0.01 | 1.26 ± 0.00 | 15.32               | 2,388  |
| COMPUTER SCIENCE, INFORMATION SYSTEMS            | 0.19 ± 0.00 | 1.30 ± 0.01 | 14.90               | 3,185  |
| COMPUTER SCIENCE, INTERDISCIPLINARY APPLICATIONS | 0.38 ± 0.01 | 1.11 ± 0.01 | 12.86               | 4,712  |
| COMPUTER SCIENCE, SOFTWARE ENGINEERING           | 0.26 ± 0.01 | 1.19 ± 0.01 | 11.57               | 3,251  |
| COMPUTER SCIENCE, THEORY & METHODS               | 0.37 ± 0.01 | 1.15 ± 0.01 | 15.32               | 3,399  |
| CONSTRUCTION & BUILDING TECHNOLOGY               | 0.94 ± 0.04 | 0.82 ± 0.01 | 10.07               | 1,603  |
| CRITICAL CARE MEDICINE                           | 1.87 ± 0.03 | 0.91 ± 0.00 | 28.14               | 2,659  |
| CRYSTALLOGRAPHY                                  | 0.48 ± 0.05 | 1.01 ± 0.02 | 12.60               | 4,796  |
| DENTISTRY, ORAL SURGERY & MEDICINE               | 1.36 ± 0.02 | 0.82 ± 0.00 | 14.53               | 4,196  |
| DERMATOLOGY                                      | 1.18 ± 0.02 | 0.84 ± 0.00 | 13.60               | 4,720  |
| DEVELOPMENTAL BIOLOGY                            | 5.03 ± 0.09 | 0.81 ± 0.00 | 52.41               | 2,744  |
| ECOLOGY                                          | 3.13 ± 0.05 | 0.77 ± 0.00 | 27.51               | 7,441  |
| EDUCATION, SCIENTIFIC DISCIPLINES                | 0.36 ± 0.02 | 0.99 ± 0.01 | 7.02                | 1,823  |
| ELECTROCHEMISTRY                                 | 1.90 ± 0.04 | 0.83 ± 0.01 | 20.65               | 4,052  |
| EMERGENCY MEDICINE                               | 0.66 ± 0.02 | 0.93 ± 0.01 | 10.61               | 1,290  |
| ENDOCRINOLOGY & METABOLISM                       | 3.10 ± 0.04 | 0.80 ± 0.00 | 31.05               | 9,803  |
| ENERGY & FUELS                                   | 0.62 ± 0.03 | 0.95 ± 0.01 | 11.07               | 4,706  |
| ENGINEERING, AEROSPACE                           | 0.25 ± 0.02 | 1.02 ± 0.02 | 5.23                | 1,949  |
| ENGINEERING, BIOMEDICAL                          | 1.54 ± 0.03 | 0.89 ± 0.00 | 21.73               | 3,010  |

Table S29: Publication year 1999.

| Subject-category                              | $a$         | $\alpha$    | $\langle c \rangle$ | $N$    |
|-----------------------------------------------|-------------|-------------|---------------------|--------|
| ENGINEERING, CHEMICAL                         | 0.94 ± 0.02 | 0.90 ± 0.00 | 13.72               | 10,693 |
| ENGINEERING, CIVIL                            | 0.72 ± 0.04 | 0.88 ± 0.01 | 9.51                | 3,847  |
| ENGINEERING, ELECTRICAL & ELECTRONIC          | 0.44 ± 0.00 | 1.10 ± 0.00 | 14.47               | 22,985 |
| ENGINEERING, ENVIRONMENTAL                    | 2.24 ± 0.05 | 0.79 ± 0.00 | 21.19               | 3,449  |
| ENGINEERING, GEOLOGICAL                       | 1.27 ± 0.05 | 0.78 ± 0.01 | 11.54               | 848    |
| ENGINEERING, INDUSTRIAL                       | 0.75 ± 0.04 | 0.87 ± 0.01 | 9.46                | 2,491  |
| ENGINEERING, MANUFACTURING                    | 0.92 ± 0.02 | 0.82 ± 0.01 | 9.74                | 2,368  |
| ENGINEERING, MARINE                           | 0.01 ± 0.00 | 1.41 ± 0.10 | 0.56                | 367    |
| ENGINEERING, MECHANICAL                       | 0.71 ± 0.02 | 0.89 ± 0.00 | 9.59                | 6,959  |
| ENGINEERING, MULTIDISCIPLINARY                | 0.42 ± 0.02 | 1.01 ± 0.01 | 9.19                | 3,627  |
| ENGINEERING, OCEAN                            | 0.64 ± 0.06 | 0.91 ± 0.02 | 9.58                | 676    |
| ENGINEERING, PETROLEUM                        | 0.11 ± 0.02 | 1.08 ± 0.04 | 2.57                | 1,314  |
| ENTOMOLOGY                                    | 1.33 ± 0.05 | 0.74 ± 0.01 | 10.63               | 3,478  |
| ENVIRONMENTAL SCIENCES                        | 2.13 ± 0.02 | 0.81 ± 0.00 | 21.40               | 12,049 |
| EVOLUTIONARY BIOLOGY                          | 3.89 ± 0.09 | 0.76 ± 0.01 | 34.59               | 2,425  |
| FISHERIES                                     | 2.80 ± 0.05 | 0.67 ± 0.00 | 17.47               | 2,740  |
| FOOD SCIENCE & TECHNOLOGY                     | 1.96 ± 0.02 | 0.77 ± 0.00 | 17.70               | 7,002  |
| FORESTRY                                      | 1.98 ± 0.04 | 0.75 ± 0.00 | 16.84               | 2,093  |
| GASTROENTEROLOGY & HEPATOLOGY                 | 1.59 ± 0.02 | 0.91 ± 0.00 | 24.34               | 7,319  |
| GENETICS & HEREDITY                           | 2.39 ± 0.04 | 0.93 ± 0.00 | 38.87               | 11,085 |
| GEOCHEMISTRY & GEOPHYSICS                     | 3.05 ± 0.05 | 0.76 ± 0.00 | 26.40               | 4,212  |
| GEOGRAPHY, PHYSICAL                           | 2.93 ± 0.04 | 0.71 ± 0.00 | 21.07               | 1,768  |
| GEOLOGY                                       | 2.09 ± 0.07 | 0.77 ± 0.01 | 18.52               | 1,483  |
| GEOSCIENCES, MULTIDISCIPLINARY                | 1.92 ± 0.02 | 0.79 ± 0.00 | 18.51               | 7,569  |
| GERIATRICS & GERONTOLOGY                      | 1.85 ± 0.03 | 0.82 ± 0.00 | 20.09               | 1,742  |
| HEALTH CARE SCIENCES & SERVICES               | 0.92 ± 0.02 | 0.92 ± 0.01 | 14.34               | 3,066  |
| HEMATOLOGY                                    | 2.37 ± 0.03 | 0.91 ± 0.00 | 36.66               | 8,188  |
| HISTORY & PHILOSOPHY OF SCIENCE               | 0.30 ± 0.01 | 0.94 ± 0.01 | 4.62                | 724    |
| IMAGING SCIENCE & PHOTOGRAPHIC TECHNOLOGY     | 1.24 ± 0.03 | 0.99 ± 0.01 | 25.69               | 799    |
| IMMUNOLOGY                                    | 2.35 ± 0.02 | 0.87 ± 0.00 | 30.87               | 16,919 |
| INFECTIOUS DISEASES                           | 2.52 ± 0.03 | 0.80 ± 0.00 | 25.36               | 6,365  |
| INSTRUMENTS & INSTRUMENTATION                 | 0.79 ± 0.02 | 0.89 ± 0.01 | 10.52               | 7,105  |
| INTEGRATIVE & COMPLEMENTARY MEDICINE          | 1.29 ± 0.09 | 0.79 ± 0.02 | 13.02               | 599    |
| LIMNOLOGY                                     | 3.62 ± 0.08 | 0.69 ± 0.01 | 25.29               | 948    |
| MARINE & FRESHWATER BIOLOGY                   | 3.08 ± 0.03 | 0.66 ± 0.00 | 18.73               | 5,977  |
| MATERIALS SCIENCE, BIOMATERIALS               | 3.08 ± 0.08 | 0.80 ± 0.01 | 31.26               | 784    |
| MATERIALS SCIENCE, CERAMICS                   | 0.81 ± 0.04 | 0.90 ± 0.01 | 11.99               | 2,790  |
| MATERIALS SCIENCE, CHARACTERIZATION & TESTING | 0.11 ± 0.02 | 1.11 ± 0.03 | 3.13                | 1,254  |
| MATERIALS SCIENCE, COATINGS & FILMS           | 1.57 ± 0.03 | 0.83 ± 0.00 | 16.95               | 3,808  |
| MATERIALS SCIENCE, COMPOSITES                 | 1.03 ± 0.03 | 0.80 ± 0.01 | 10.24               | 1,305  |
| MATERIALS SCIENCE, MULTIDISCIPLINARY          | 0.84 ± 0.01 | 0.98 ± 0.00 | 16.13               | 23,804 |
| MATERIALS SCIENCE, PAPER & WOOD               | 0.57 ± 0.04 | 0.83 ± 0.01 | 6.24                | 1,064  |
| MATERIALS SCIENCE, TEXTILES                   | 0.40 ± 0.04 | 0.91 ± 0.02 | 5.63                | 760    |
| MATHEMATICAL & COMPUTATIONAL BIOLOGY          | 0.97 ± 0.07 | 1.01 ± 0.02 | 23.04               | 1,436  |
| MATHEMATICS                                   | 0.42 ± 0.01 | 0.93 ± 0.00 | 6.44                | 11,458 |
| MATHEMATICS, APPLIED                          | 0.58 ± 0.02 | 0.94 ± 0.01 | 9.47                | 8,708  |
| MATHEMATICS, INTERDISCIPLINARY APPLICATIONS   | 0.74 ± 0.03 | 0.96 ± 0.01 | 13.82               | 3,195  |
| MECHANICS                                     | 0.90 ± 0.01 | 0.90 ± 0.00 | 13.03               | 7,338  |
| MEDICAL ETHICS                                | 0.58 ± 0.03 | 0.87 ± 0.01 | 7.62                | 285    |
| MEDICAL INFORMATICS                           | 0.49 ± 0.03 | 1.05 ± 0.01 | 13.49               | 1,159  |

Table S30: Publication year 1999.

| Subject-category                              | $a$         | $\alpha$    | $\langle c \rangle$ | $N$    |
|-----------------------------------------------|-------------|-------------|---------------------|--------|
| MEDICAL LABORATORY TECHNOLOGY                 | 1.20 ± 0.02 | 0.84 ± 0.00 | 14.16               | 1,849  |
| MEDICINE, GENERAL & INTERNAL                  | 0.15 ± 0.01 | 1.50 ± 0.01 | 25.43               | 15,478 |
| MEDICINE, LEGAL                               | 1.01 ± 0.03 | 0.75 ± 0.01 | 8.41                | 928    |
| MEDICINE, RESEARCH & EXPERIMENTAL             | 0.90 ± 0.02 | 1.14 ± 0.01 | 32.63               | 7,902  |
| METALLURGY & METALLURGICAL ENGINEERING        | 0.50 ± 0.01 | 1.02 ± 0.01 | 11.48               | 4,936  |
| METEOROLOGY & ATMOSPHERIC SCIENCES            | 1.88 ± 0.02 | 0.87 ± 0.00 | 23.96               | 5,099  |
| MICROBIOLOGY                                  | 3.18 ± 0.03 | 0.76 ± 0.00 | 28.06               | 11,077 |
| MICROSCOPY                                    | 0.70 ± 0.03 | 0.96 ± 0.01 | 12.21               | 772    |
| MINERALOGY                                    | 1.62 ± 0.07 | 0.86 ± 0.01 | 20.57               | 1,294  |
| MINING & MINERAL PROCESSING                   | 0.55 ± 0.03 | 0.92 ± 0.01 | 8.51                | 1,145  |
| MULTIDISCIPLINARY SCIENCES                    | 1.39 ± 0.06 | 1.22 ± 0.01 | 70.71               | 10,958 |
| MYCOLOGY                                      | 1.35 ± 0.06 | 0.82 ± 0.01 | 14.80               | 950    |
| NANOSCIENCE & NANOTECHNOLOGY                  | 0.95 ± 0.03 | 1.02 ± 0.01 | 21.37               | 3,219  |
| NEUROIMAGING                                  | 1.89 ± 0.09 | 0.95 ± 0.01 | 34.15               | 968    |
| NEUROSCIENCES                                 | 3.27 ± 0.04 | 0.82 ± 0.00 | 35.12               | 21,227 |
| NUCLEAR SCIENCE & TECHNOLOGY                  | 0.67 ± 0.02 | 0.87 ± 0.00 | 8.08                | 6,942  |
| NURSING                                       | 0.97 ± 0.07 | 0.78 ± 0.02 | 8.83                | 1,804  |
| NUTRITION & DIETETICS                         | 1.84 ± 0.03 | 0.86 ± 0.00 | 22.37               | 3,938  |
| OBSTETRICS & GYNECOLOGY                       | 1.76 ± 0.04 | 0.78 ± 0.00 | 16.47               | 5,909  |
| OCEANOGRAPHY                                  | 3.67 ± 0.06 | 0.67 ± 0.00 | 23.41               | 3,383  |
| ONCOLOGY                                      | 2.49 ± 0.02 | 0.87 ± 0.00 | 32.14               | 16,269 |
| OPERATIONS RESEARCH & MANAGEMENT SCIENCE      | 0.96 ± 0.01 | 0.90 ± 0.00 | 14.24               | 3,542  |
| OPHTHALMOLOGY                                 | 1.46 ± 0.05 | 0.85 ± 0.01 | 18.02               | 5,093  |
| OPTICS                                        | 0.95 ± 0.01 | 0.94 ± 0.00 | 15.59               | 10,311 |
| ORNITHOLOGY                                   | 1.78 ± 0.11 | 0.72 ± 0.02 | 15.62               | 776    |
| ORTHOPEDICS                                   | 1.65 ± 0.05 | 0.83 ± 0.01 | 18.77               | 4,309  |
| OTORHINOLARYNGOLOGY                           | 1.69 ± 0.03 | 0.73 ± 0.00 | 12.96               | 2,855  |
| PALEONTOLOGY                                  | 1.88 ± 0.04 | 0.76 ± 0.01 | 16.27               | 1,103  |
| PARASITOLOGY                                  | 2.14 ± 0.05 | 0.71 ± 0.01 | 15.52               | 2,020  |
| PATHOLOGY                                     | 1.51 ± 0.02 | 0.89 ± 0.00 | 21.26               | 5,664  |
| PEDIATRICS                                    | 1.21 ± 0.03 | 0.86 ± 0.00 | 14.91               | 8,609  |
| PERIPHERAL VASCULAR DISEASE                   | 2.38 ± 0.02 | 0.91 ± 0.00 | 36.95               | 7,303  |
| PHARMACOLOGY & PHARMACY                       | 2.07 ± 0.03 | 0.79 ± 0.00 | 19.90               | 18,956 |
| PHYSICS, APPLIED                              | 0.82 ± 0.01 | 0.99 ± 0.00 | 16.52               | 22,306 |
| PHYSICS, ATOMIC, MOLECULAR & CHEMICAL         | 2.05 ± 0.05 | 0.81 ± 0.00 | 21.36               | 11,829 |
| PHYSICS, CONDENSED MATTER                     | 0.72 ± 0.01 | 1.01 ± 0.00 | 16.06               | 19,149 |
| PHYSICS, FLUIDS & PLASMAS                     | 1.89 ± 0.03 | 0.80 ± 0.00 | 18.85               | 4,626  |
| PHYSICS, MATHEMATICAL                         | 0.79 ± 0.02 | 0.98 ± 0.00 | 15.62               | 5,471  |
| PHYSICS, MULTIDISCIPLINARY                    | 0.65 ± 0.02 | 1.12 ± 0.00 | 23.03               | 12,198 |
| PHYSICS, NUCLEAR                              | 0.86 ± 0.01 | 0.91 ± 0.00 | 12.43               | 4,333  |
| PHYSICS, PARTICLES & FIELDS                   | 0.87 ± 0.02 | 1.04 ± 0.01 | 21.17               | 6,450  |
| PHYSIOLOGY                                    | 4.40 ± 0.05 | 0.66 ± 0.00 | 27.12               | 7,333  |
| PLANT SCIENCES                                | 2.03 ± 0.03 | 0.80 ± 0.00 | 19.90               | 11,714 |
| POLYMER SCIENCE                               | 1.51 ± 0.02 | 0.85 ± 0.00 | 18.00               | 9,425  |
| PRIMARY HEALTH CARE                           | 0.29 ± 0.03 | 1.06 ± 0.02 | 7.43                | 1,341  |
| PSYCHIATRY                                    | 2.12 ± 0.02 | 0.89 ± 0.00 | 29.65               | 7,804  |
| PSYCHOLOGY                                    | 3.13 ± 0.07 | 0.77 ± 0.01 | 27.39               | 2,604  |
| PUBLIC, ENVIRONMENTAL & OCCUPATIONAL HEALTH   | 1.45 ± 0.02 | 0.89 ± 0.00 | 19.99               | 8,439  |
| RADIOLOGY, NUCLEAR MEDICINE & MEDICAL IMAGING | 1.09 ± 0.02 | 0.96 ± 0.00 | 19.94               | 10,455 |
| REHABILITATION                                | 1.22 ± 0.03 | 0.88 ± 0.00 | 16.11               | 1,444  |

Table S31: Publication year 1999.

| Subject-category                    | $a$                               | $\alpha$                          | $\langle c \rangle$ | $N$            |
|-------------------------------------|-----------------------------------|-----------------------------------|---------------------|----------------|
| REMOTE SENSING                      | $1.73 \pm 0.04$                   | $0.87 \pm 0.01$                   | 22.32               | 934            |
| REPRODUCTIVE BIOLOGY                | $3.31 \pm 0.04$                   | $0.70 \pm 0.00$                   | 23.39               | 3,054          |
| RESPIRATORY SYSTEM                  | $1.75 \pm 0.03$                   | $0.87 \pm 0.00$                   | 23.44               | 6,073          |
| RHEUMATOLOGY                        | $1.59 \pm 0.05$                   | $0.90 \pm 0.01$                   | 23.40               | 2,381          |
| ROBOTICS                            | $0.64 \pm 0.03$                   | $0.97 \pm 0.01$                   | 11.78               | 460            |
| SOIL SCIENCE                        | $2.46 \pm 0.04$                   | $0.72 \pm 0.00$                   | 18.42               | 2,551          |
| SPECTROSCOPY                        | $1.13 \pm 0.02$                   | $0.85 \pm 0.00$                   | 13.40               | 5,804          |
| SPORT SCIENCES                      | $1.77 \pm 0.06$                   | $0.82 \pm 0.01$                   | 19.17               | 3,737          |
| STATISTICS & PROBABILITY            | $0.49 \pm 0.02$                   | $1.06 \pm 0.01$                   | 13.00               | 4,519          |
| SUBSTANCE ABUSE                     | $3.32 \pm 0.06$                   | $0.70 \pm 0.00$                   | 23.46               | 952            |
| SURGERY                             | $1.27 \pm 0.02$                   | $0.88 \pm 0.00$                   | 16.72               | 19,737         |
| TELECOMMUNICATIONS                  | $0.13 \pm 0.00$                   | $1.37 \pm 0.01$                   | 13.33               | 3,927          |
| THERMODYNAMICS                      | $1.25 \pm 0.02$                   | $0.78 \pm 0.00$                   | 11.49               | 2,956          |
| TOXICOLOGY                          | $2.24 \pm 0.03$                   | $0.76 \pm 0.00$                   | 19.46               | 5,205          |
| TRANSPLANTATION                     | $0.85 \pm 0.01$                   | $0.94 \pm 0.00$                   | 14.23               | 4,108          |
| TRANSPORTATION SCIENCE & TECHNOLOGY | $0.74 \pm 0.04$                   | $0.94 \pm 0.01$                   | 12.53               | 736            |
| TROPICAL MEDICINE                   | $1.65 \pm 0.05$                   | $0.77 \pm 0.01$                   | 14.28               | 1,429          |
| UROLOGY & NEPHROLOGY                | $1.52 \pm 0.03$                   | $0.88 \pm 0.00$                   | 21.29               | 6,490          |
| VETERINARY SCIENCES                 | $1.11 \pm 0.03$                   | $0.80 \pm 0.01$                   | 11.17               | 6,331          |
| VIROLOGY                            | $4.44 \pm 0.05$                   | $0.71 \pm 0.00$                   | 32.74               | 4,158          |
| WATER RESOURCES                     | $2.00 \pm 0.03$                   | $0.76 \pm 0.00$                   | 17.59               | 4,265          |
| ZOOLOGY                             | $2.16 \pm 0.03$                   | $0.74 \pm 0.00$                   | 17.34               | 5,246          |
| <b>TOTAL</b>                        | <b><math>1.00 \pm 0.00</math></b> | <b><math>1.00 \pm 0.00</math></b> | <b>21.97</b>        | <b>987,830</b> |

Table S32: Publication year 1999.

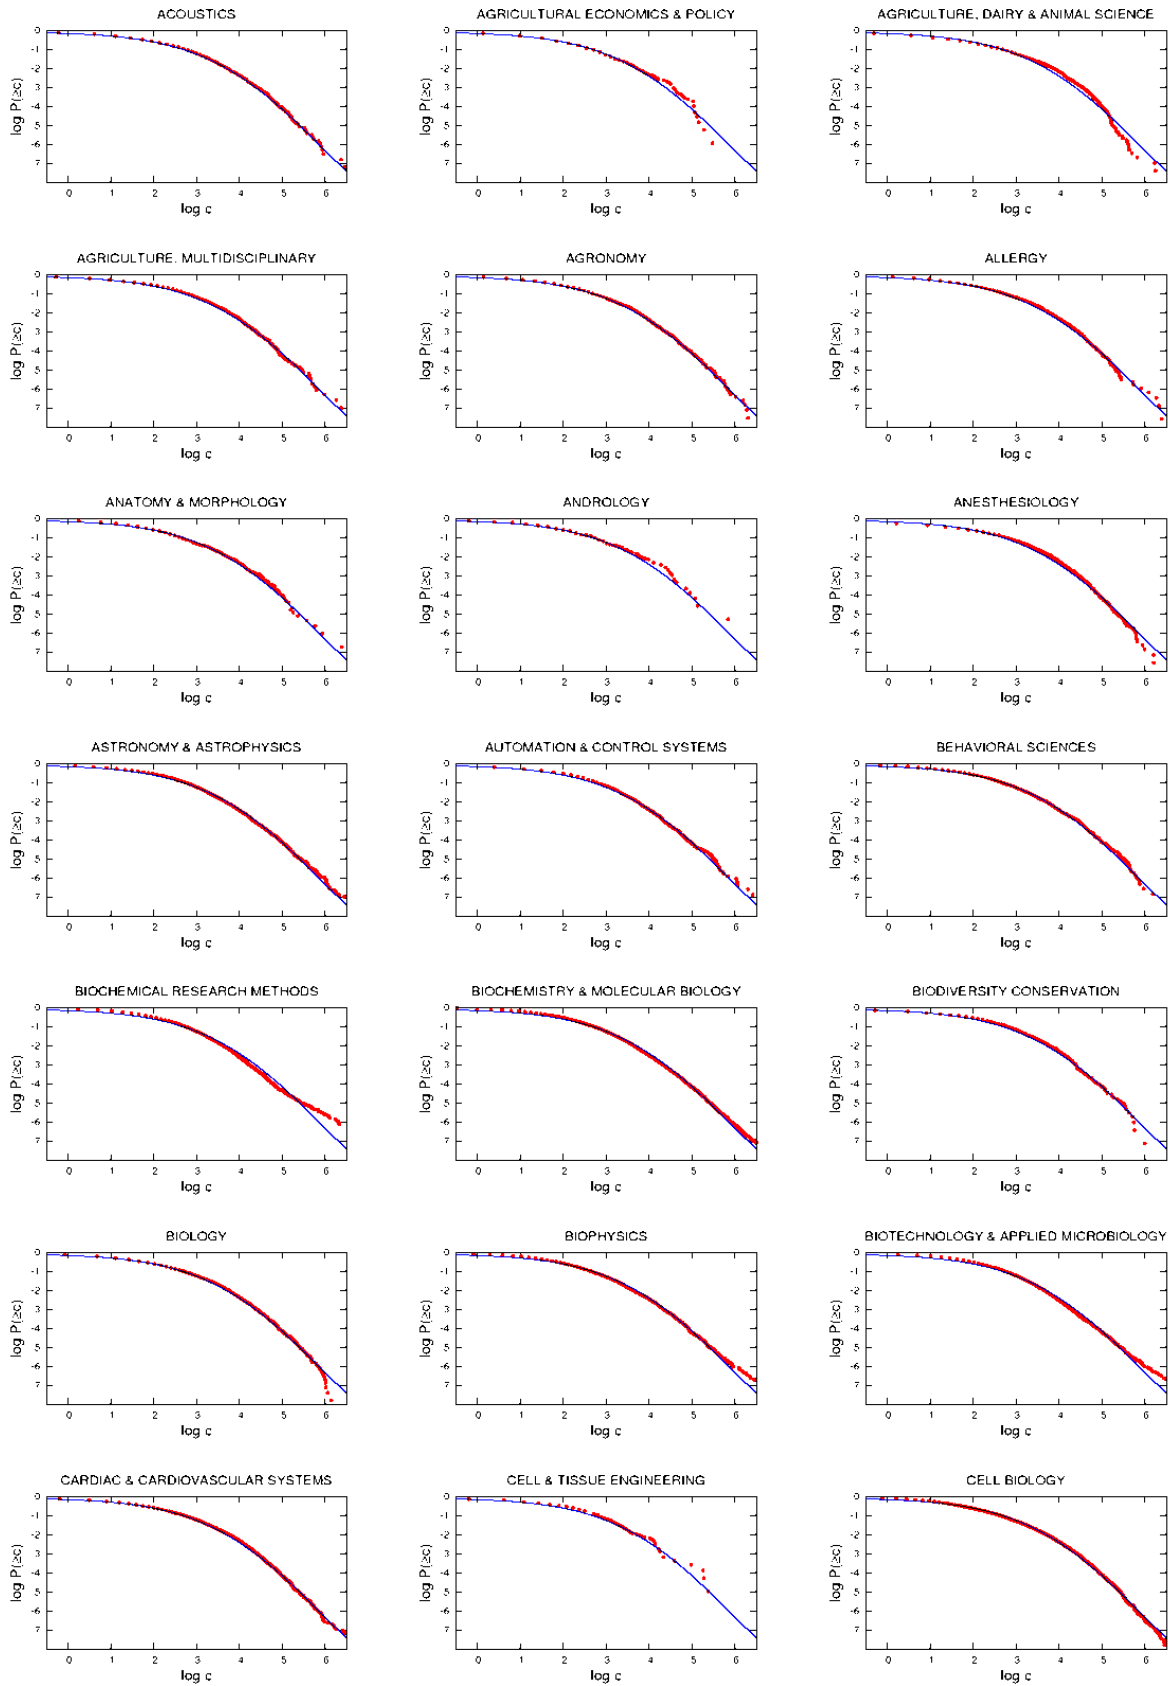

Figure S86: Publication year 1999.

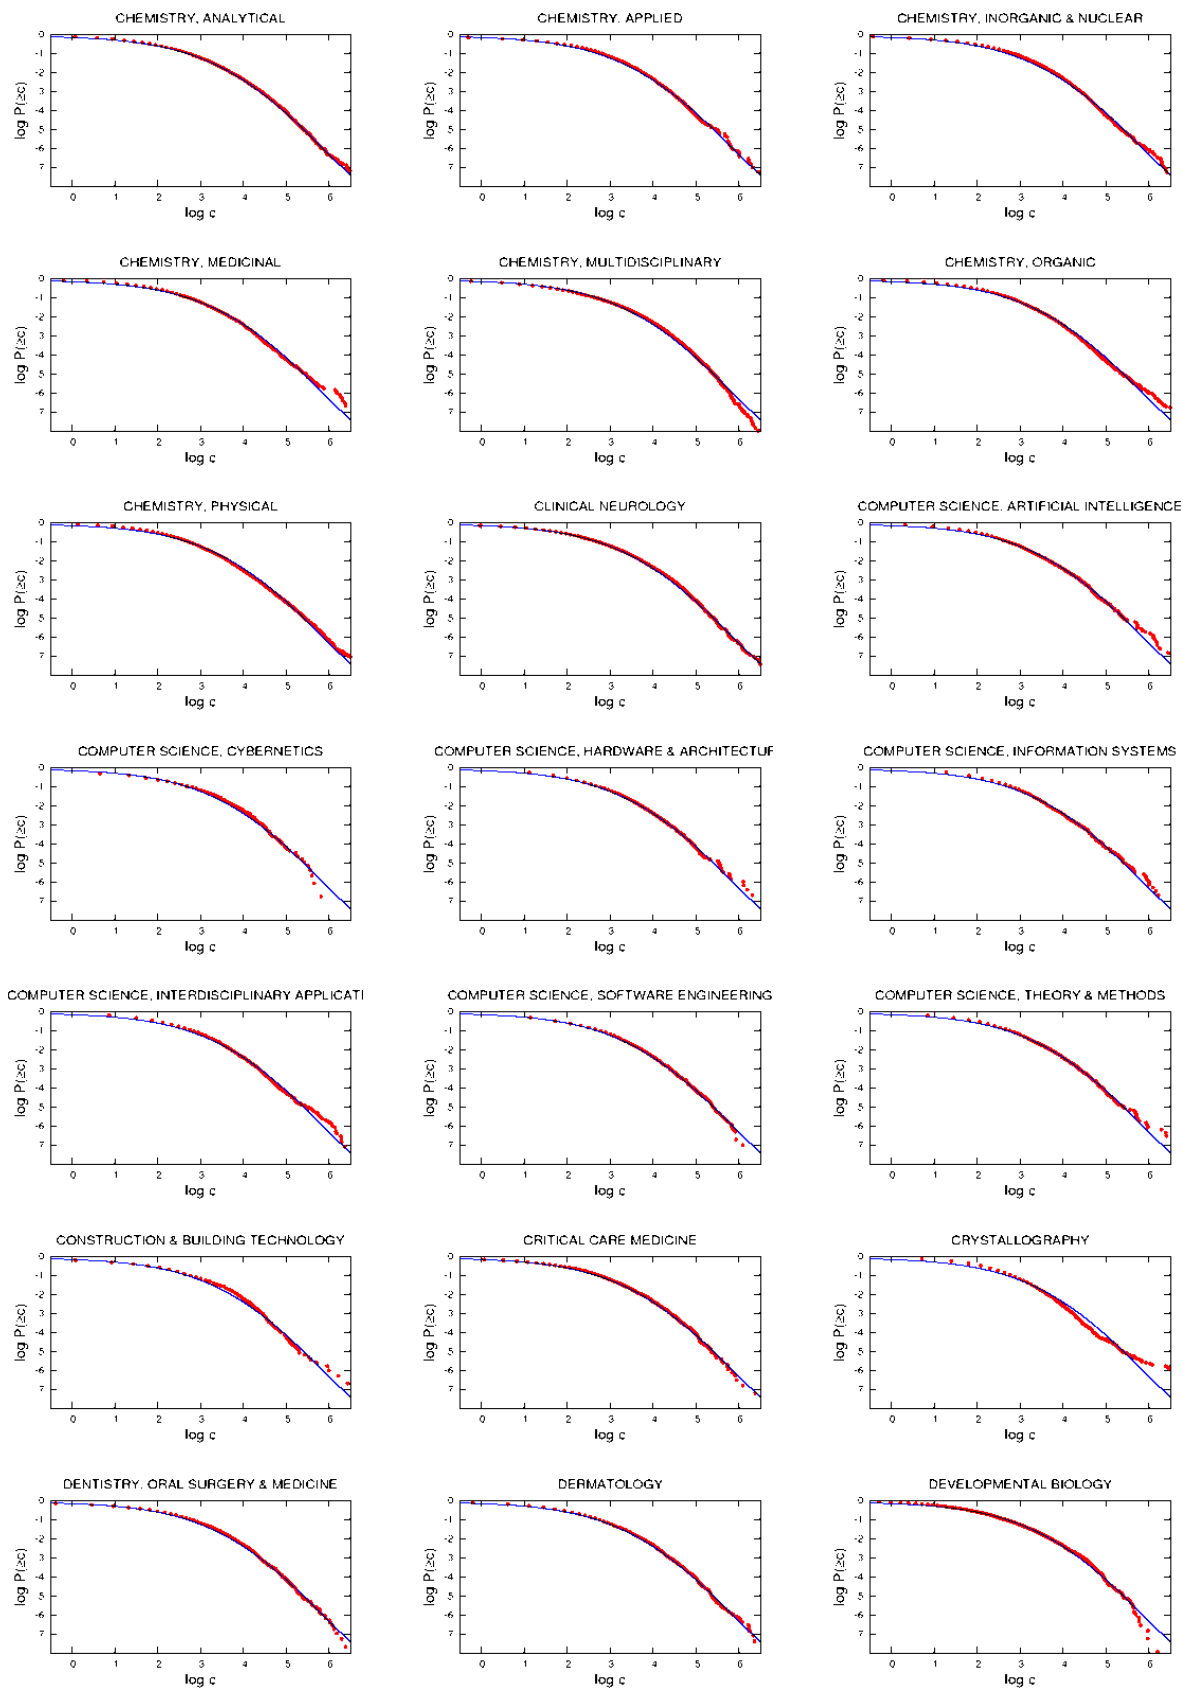

Figure S87: Publication year 1999.

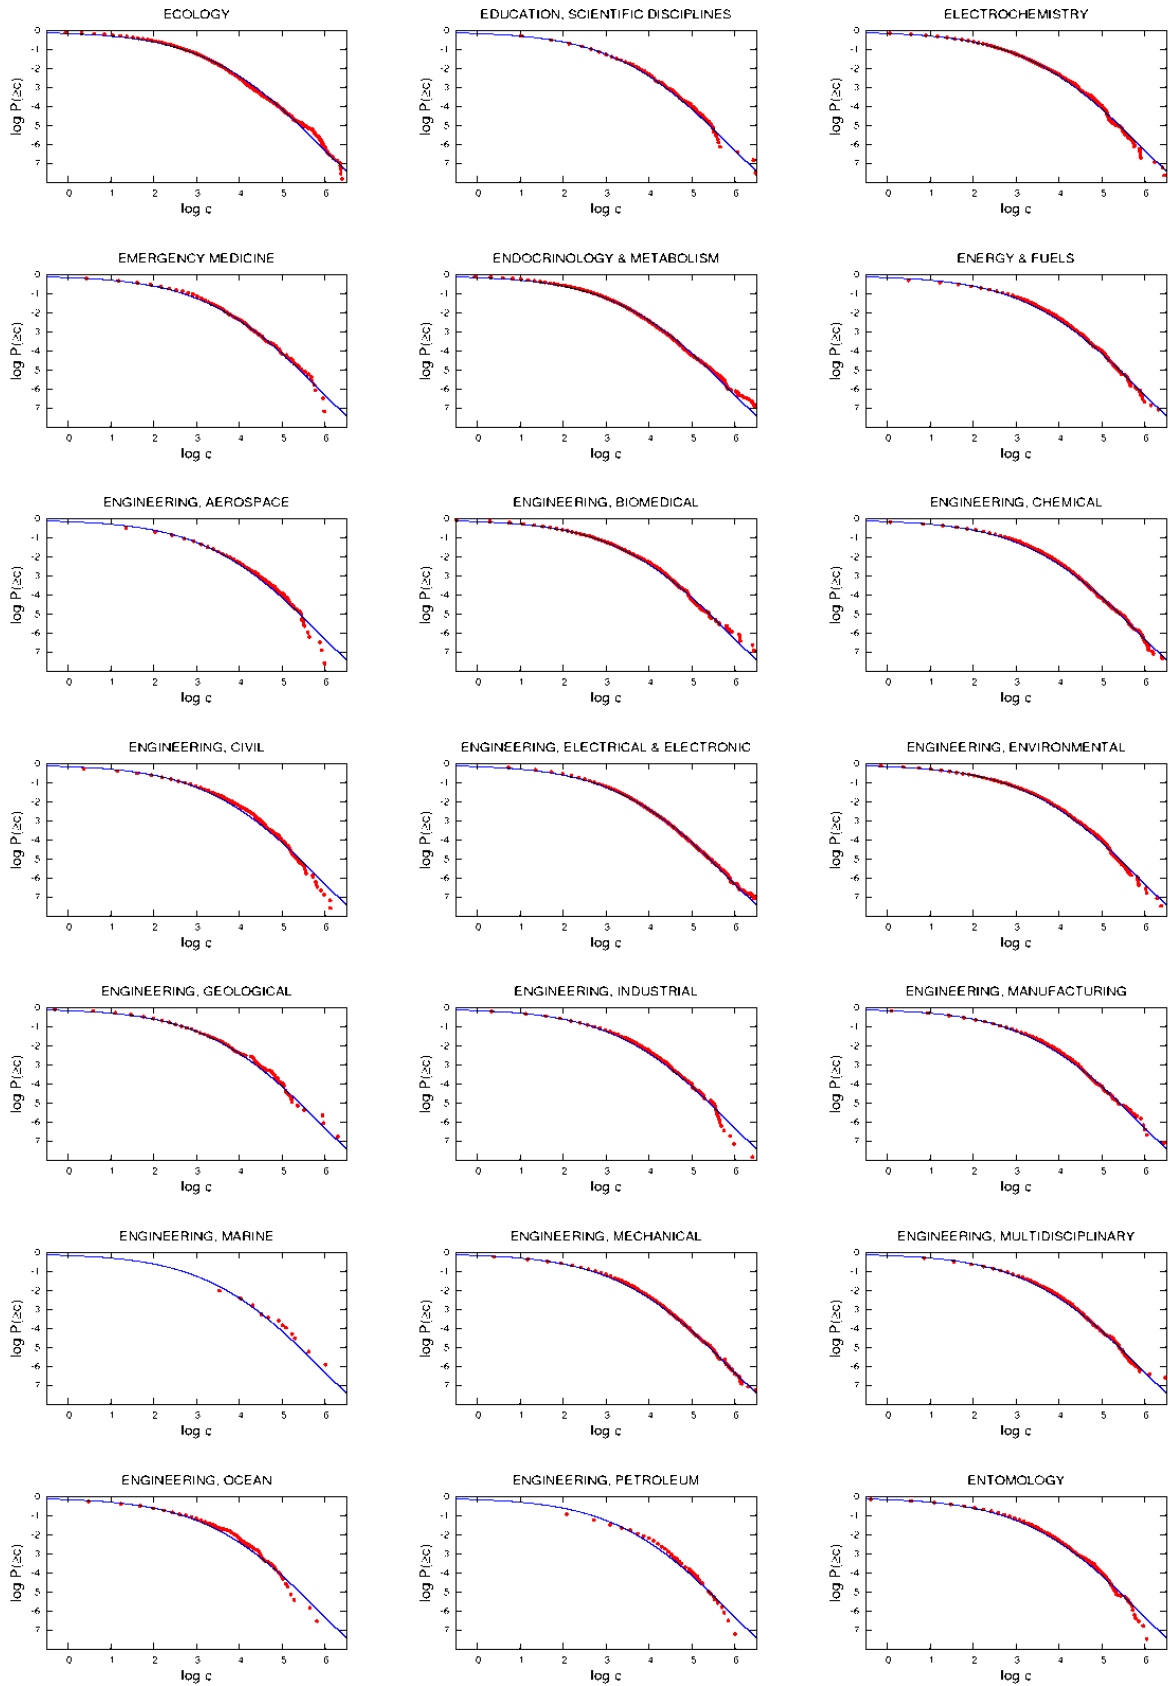

Figure S88: Publication year 1999.



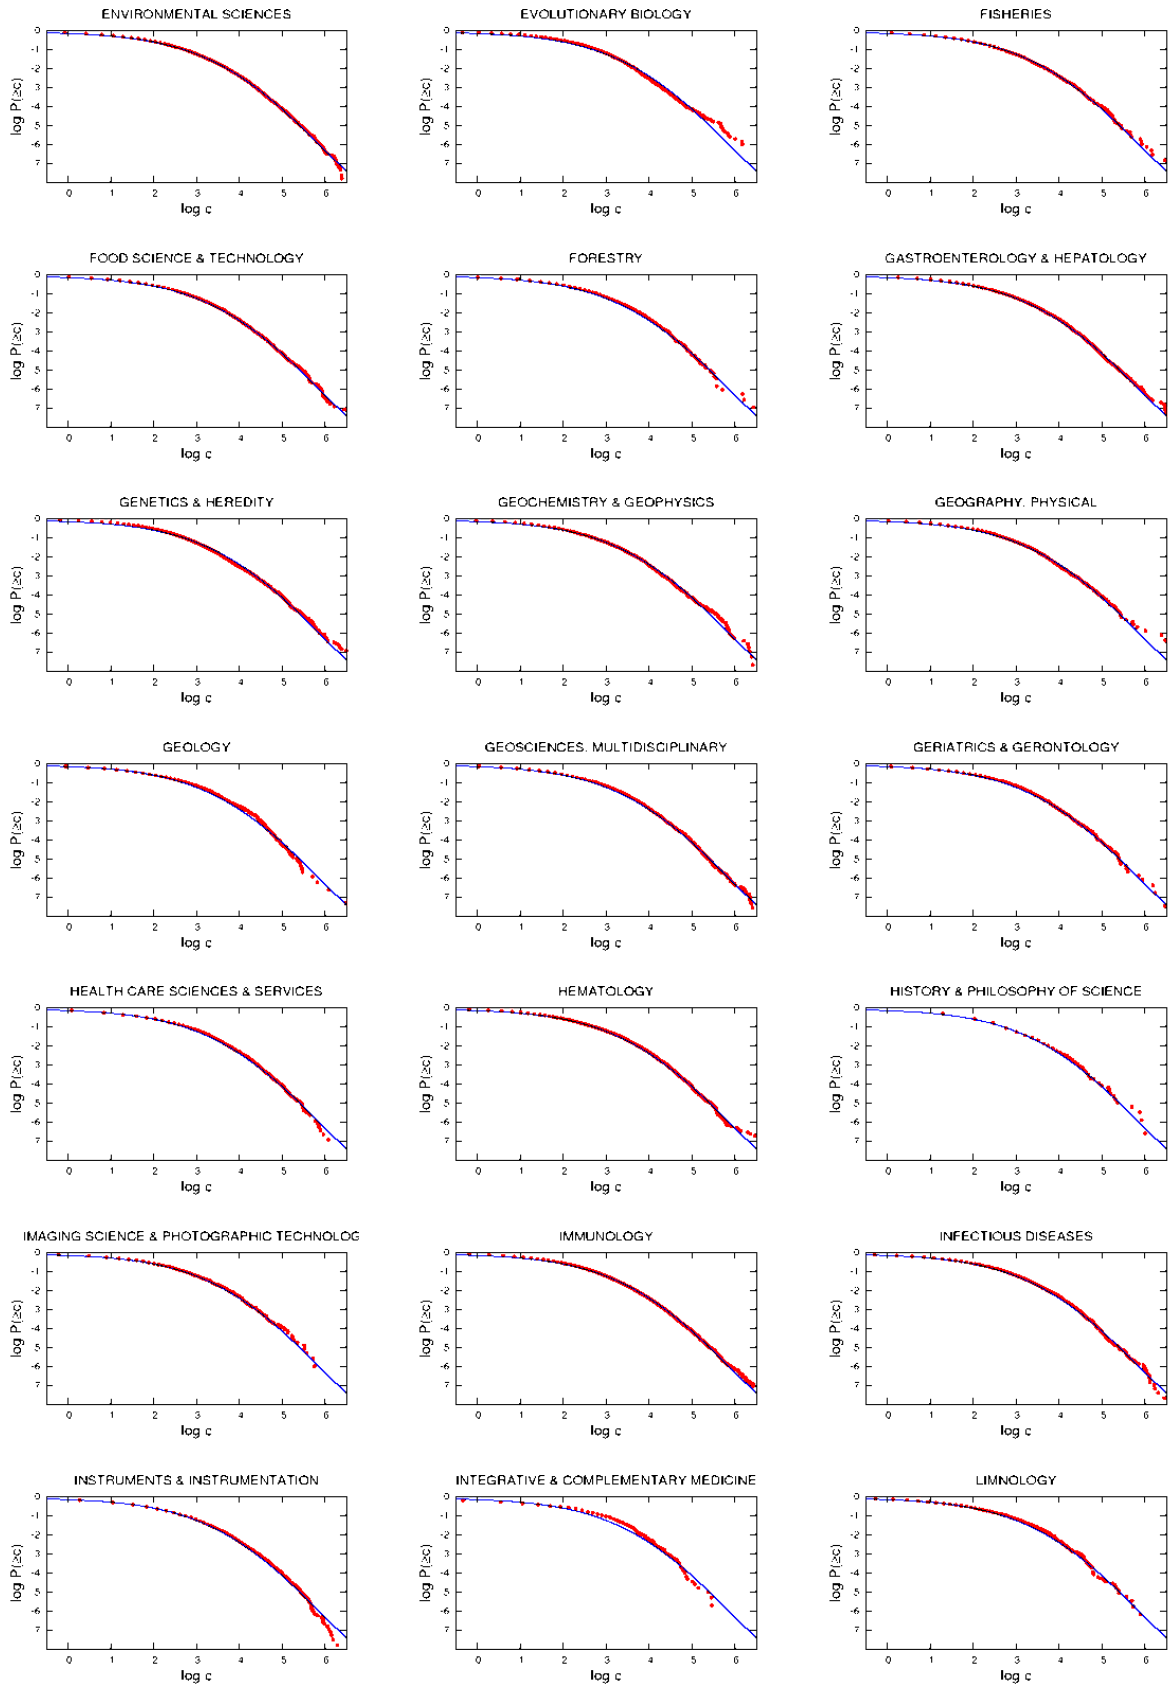

Figure S89: Publication year 1999.

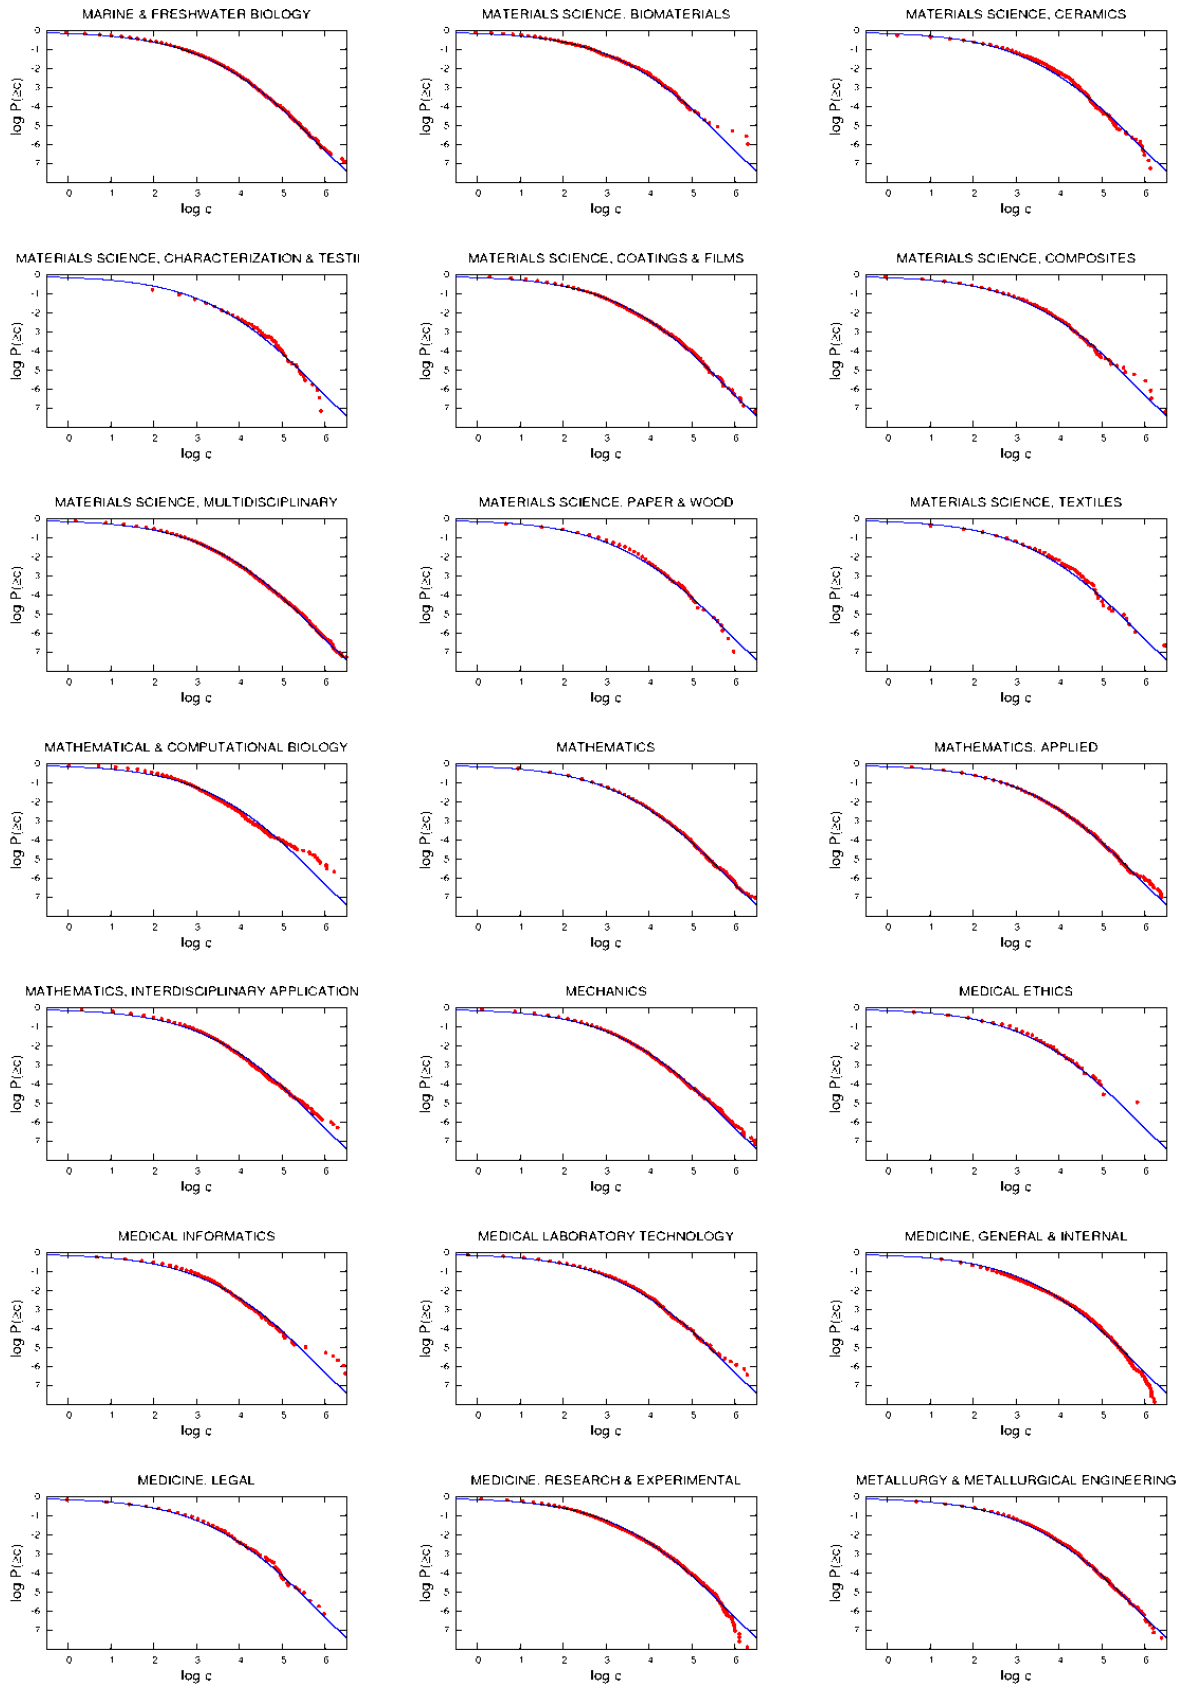

Figure S90: Publication year 1999.

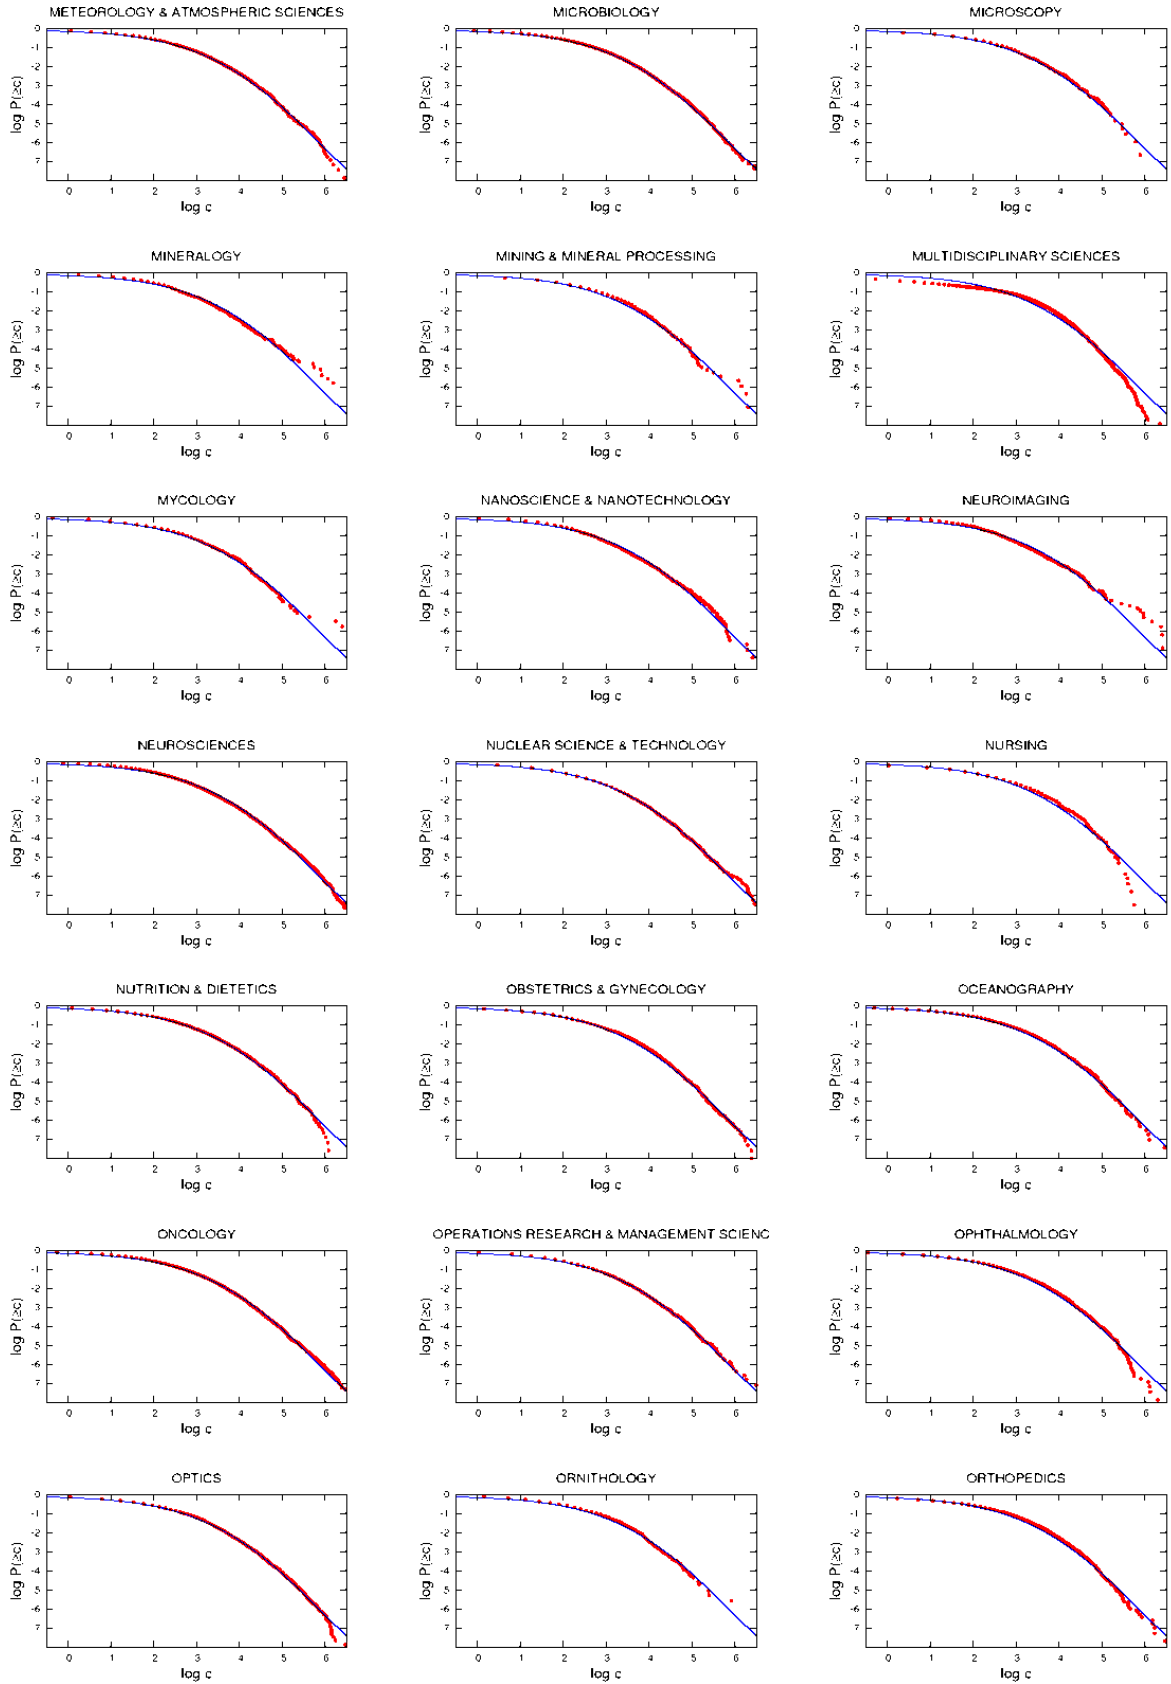

Figure S91: Publication year 1999.

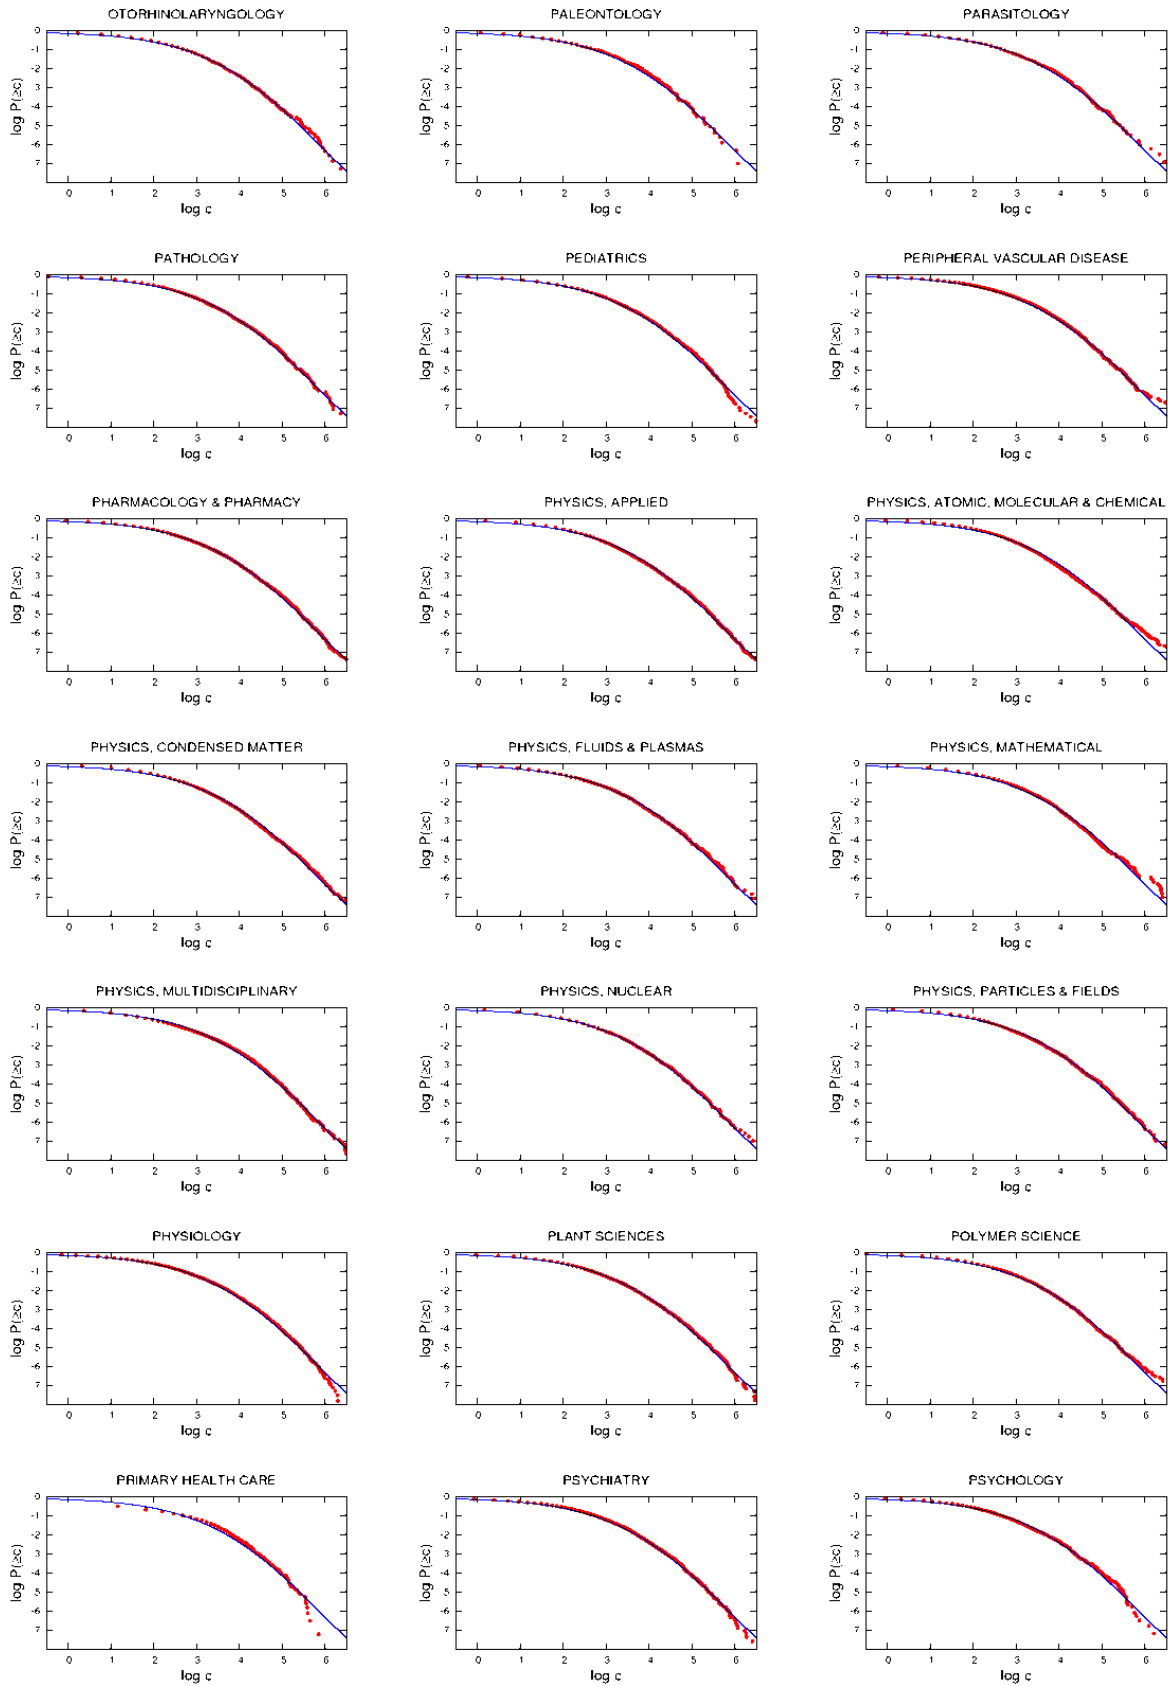

Figure S92: Publication year 1999.

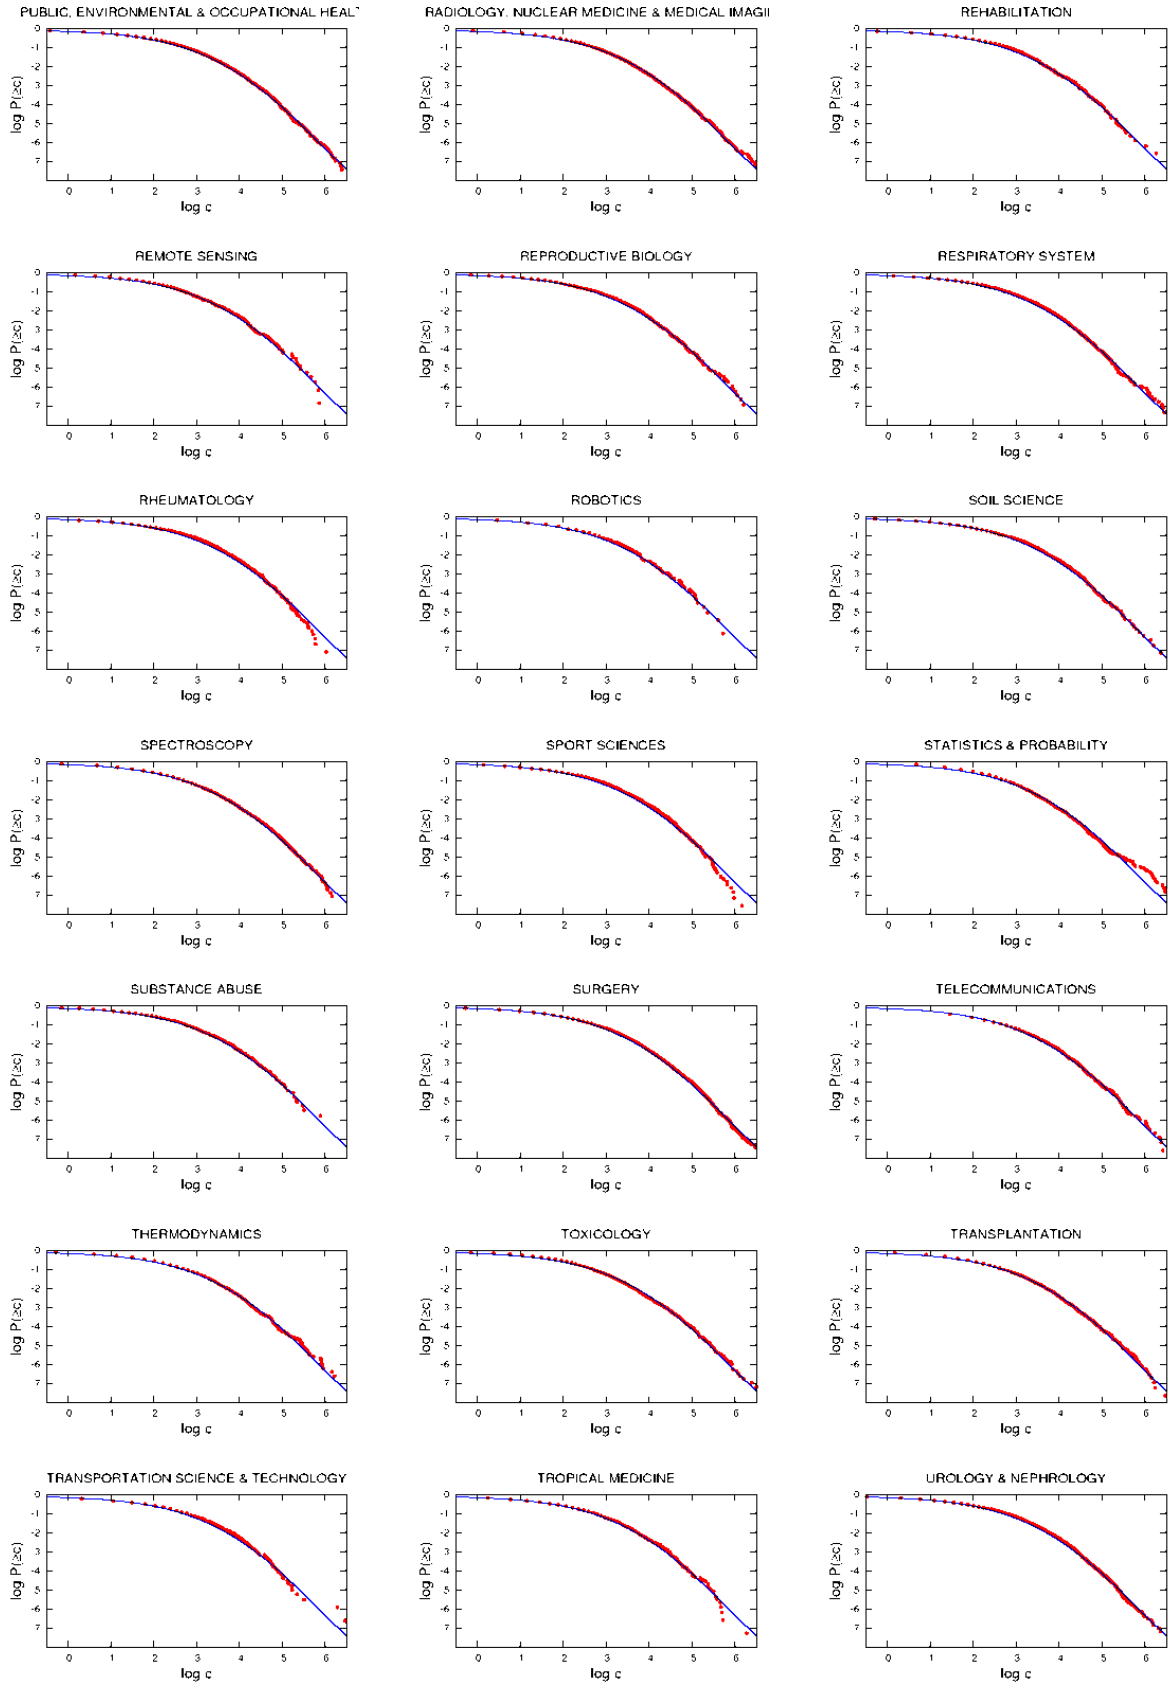

Figure S93: Publication year 1999.

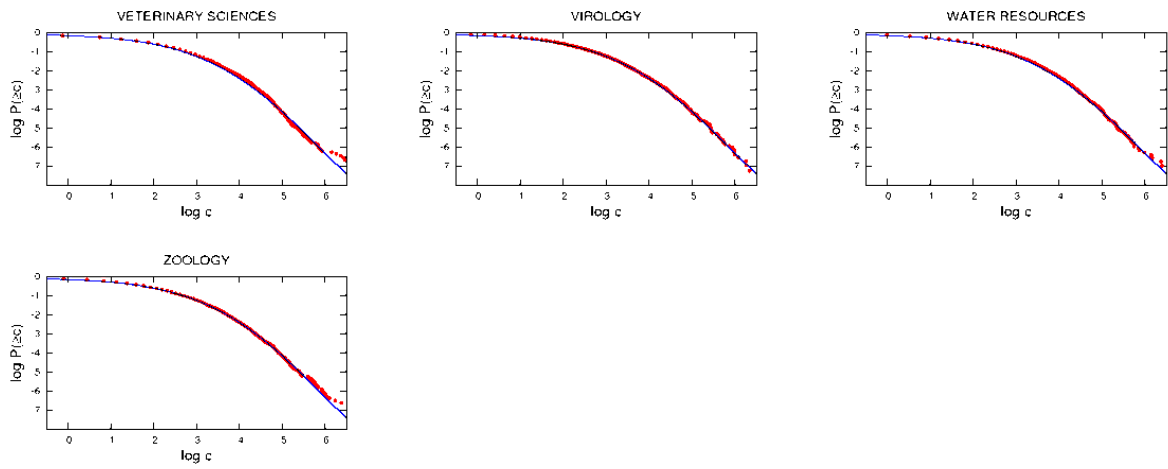

Figure S94: Publication year 1999.

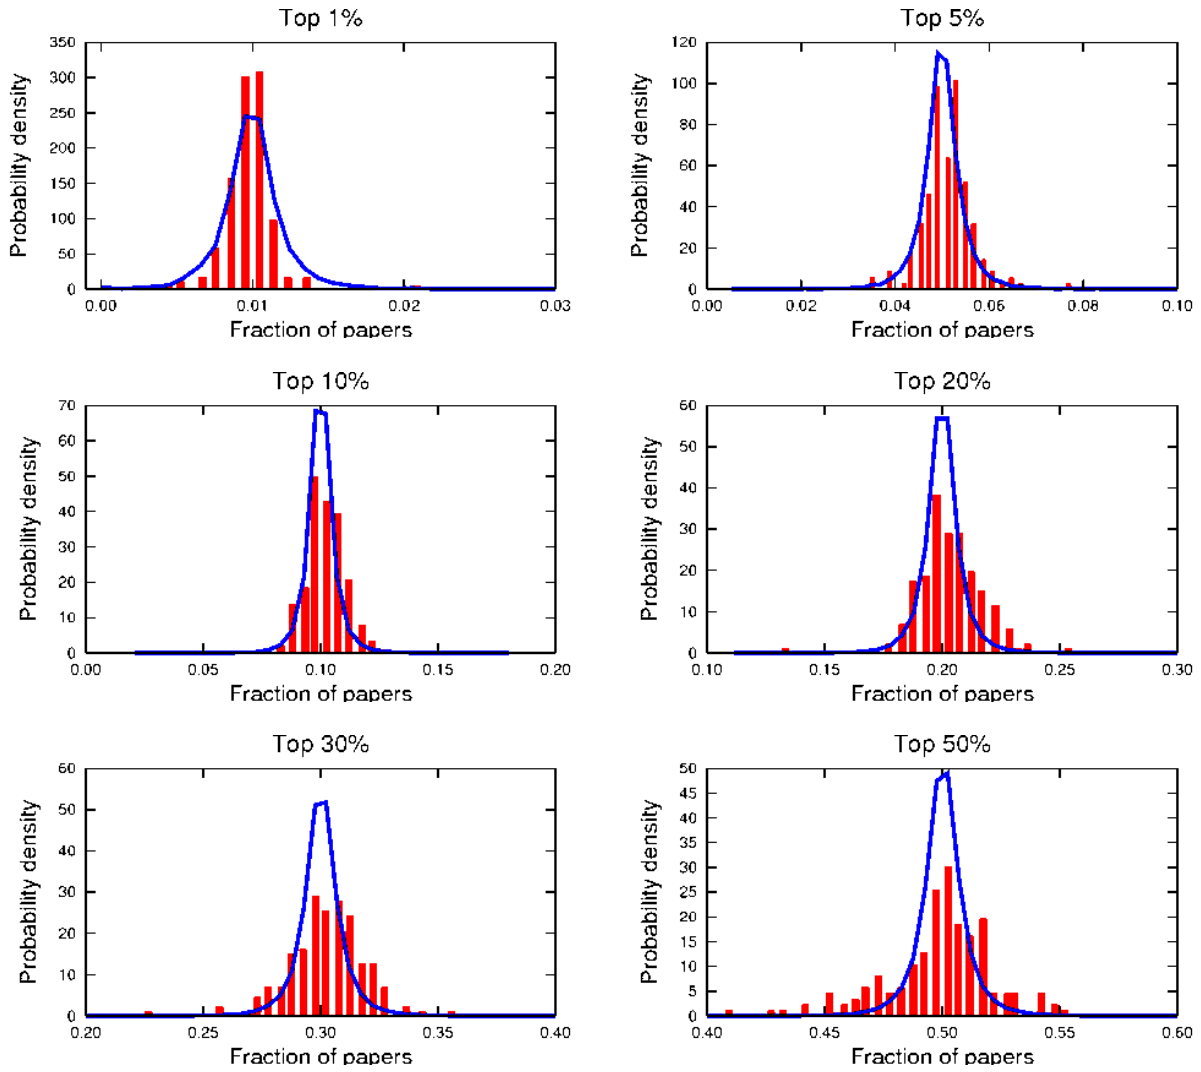

Figure S95: Publication year 1999.
