# Supplementary material for: A Reverse Engineering Approach to the Suppression of Citation Biases Reveals Universal Properties of Citation Distributions
Source: PubMed Central journal article supplement (PMC3315498; doi:10.1371/journal.pone.0033833), 2012-03-29
Supplement: pone.0033833.s007.pdf [file pone.0033833.s007.pdf]

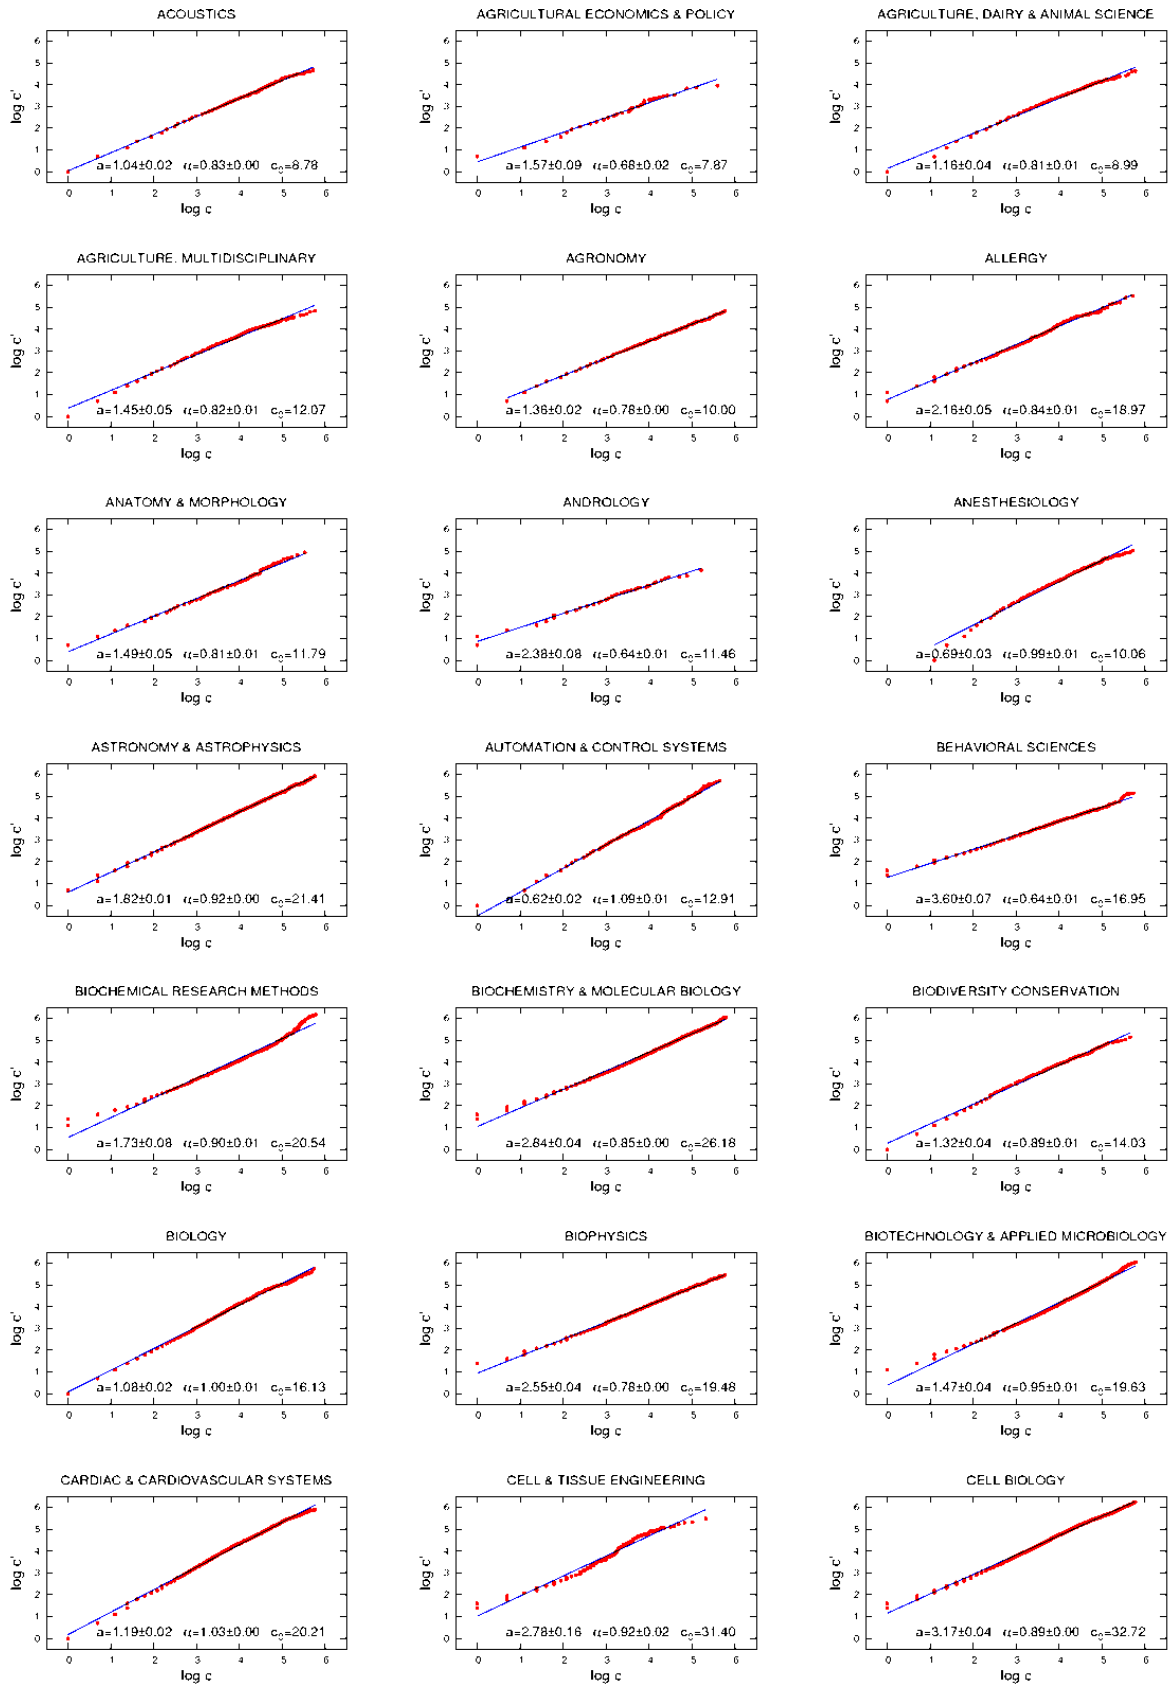

Figure S96: Publication year 2004.

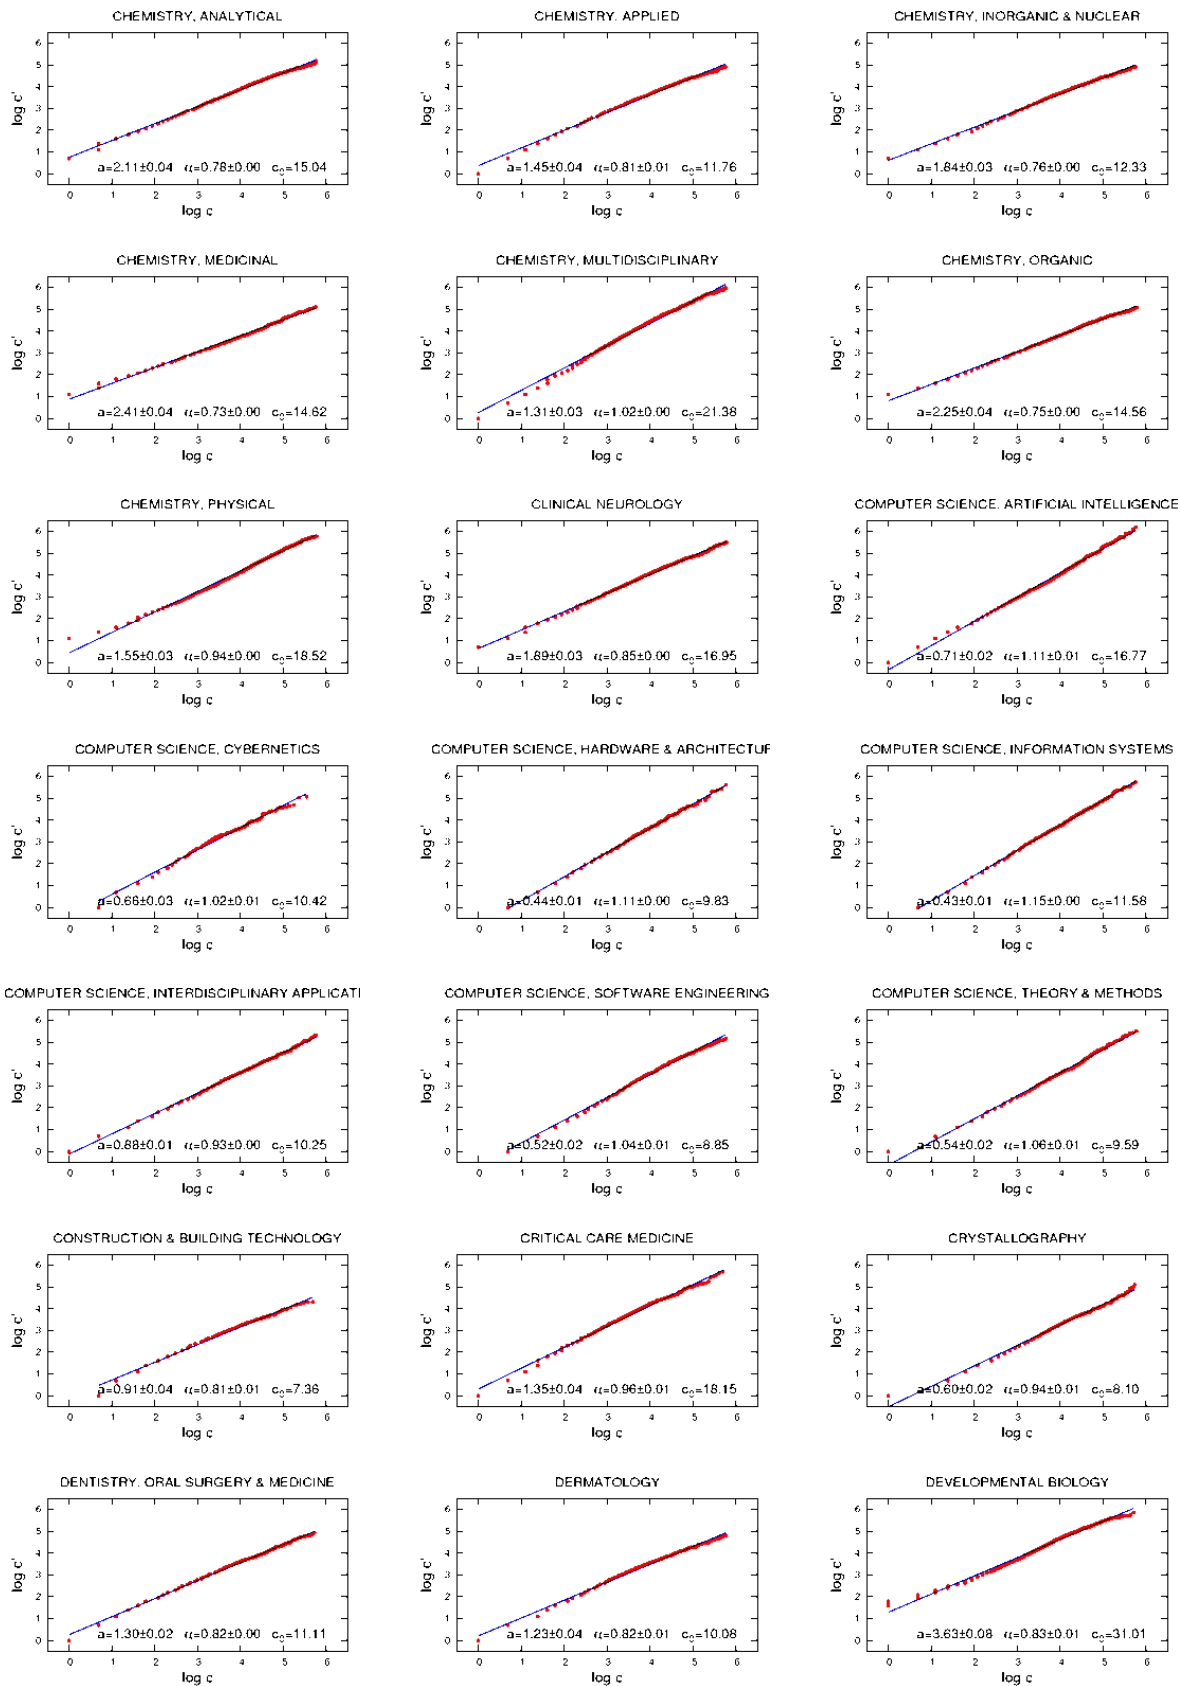

Figure S97: Publication year 2004.

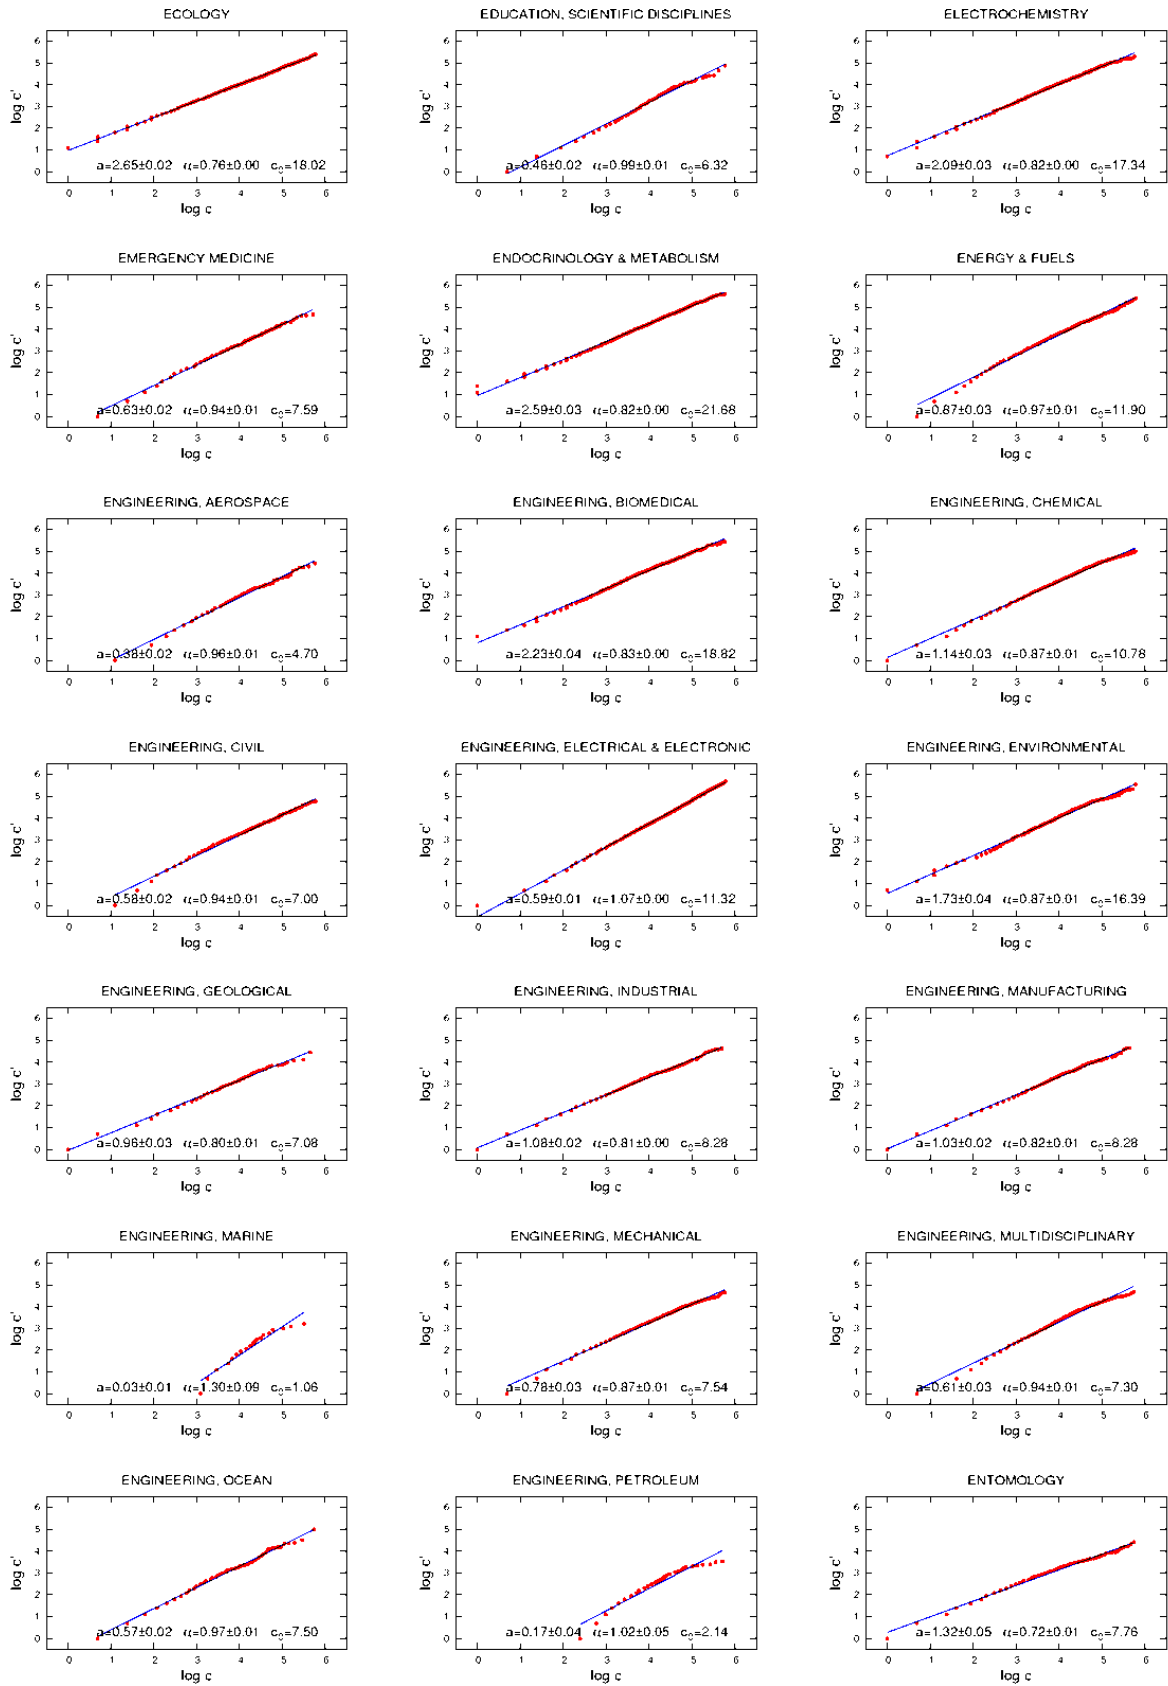

Figure S98: Publication year 2004.

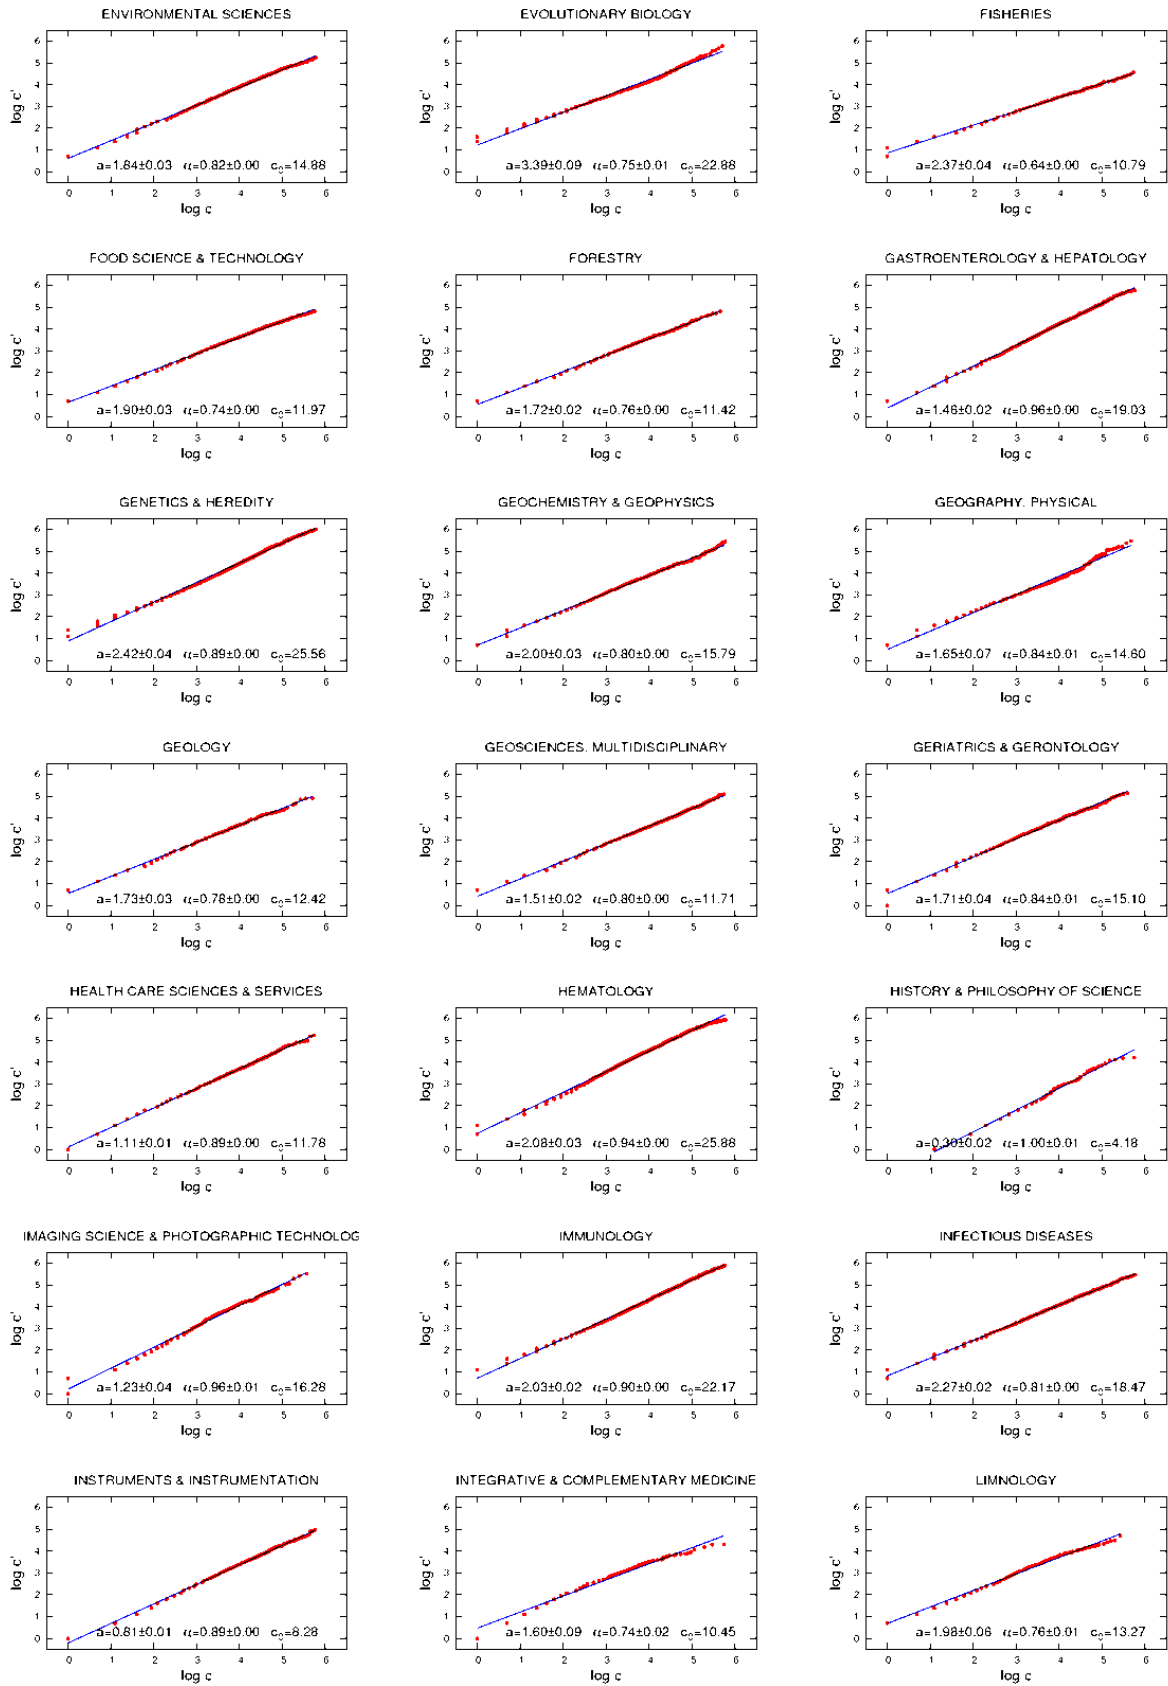

Figure S99: Publication year 2004.

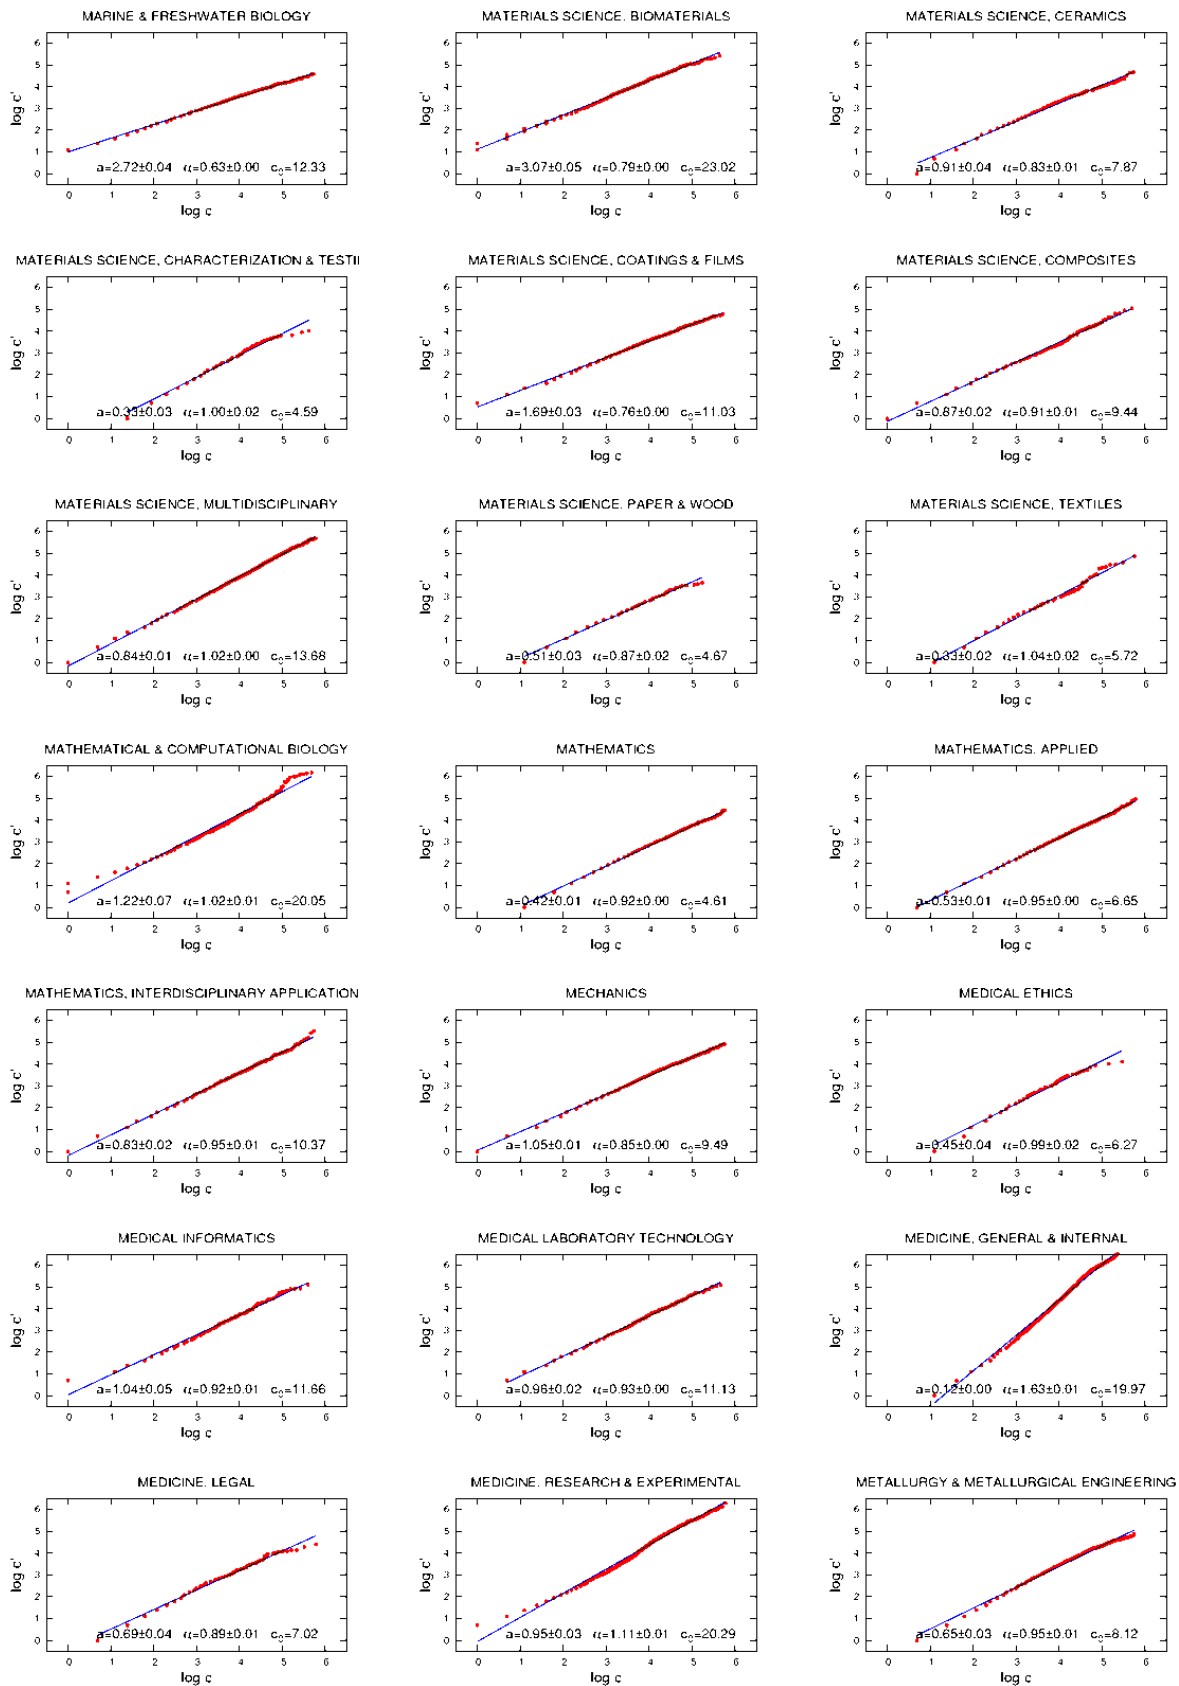

Figure S100: Publication year 2004.

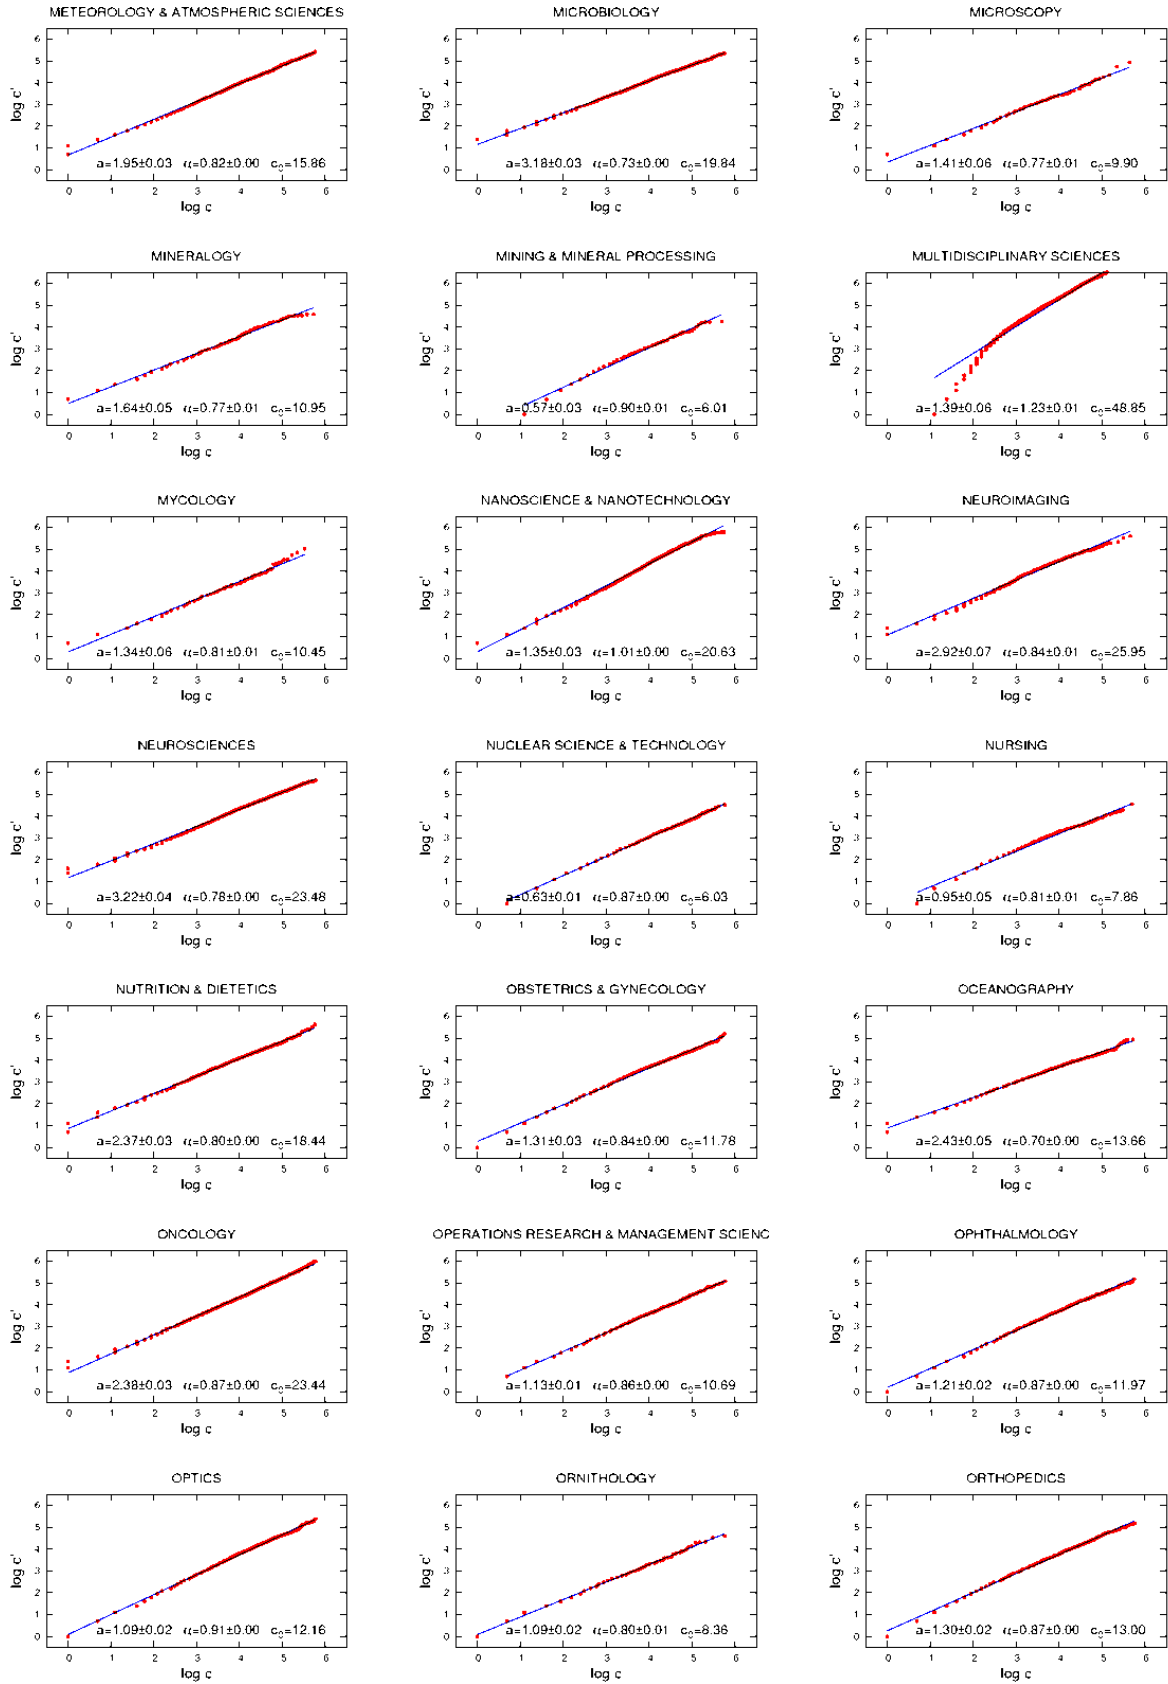

Figure S101: Publication year 2004.

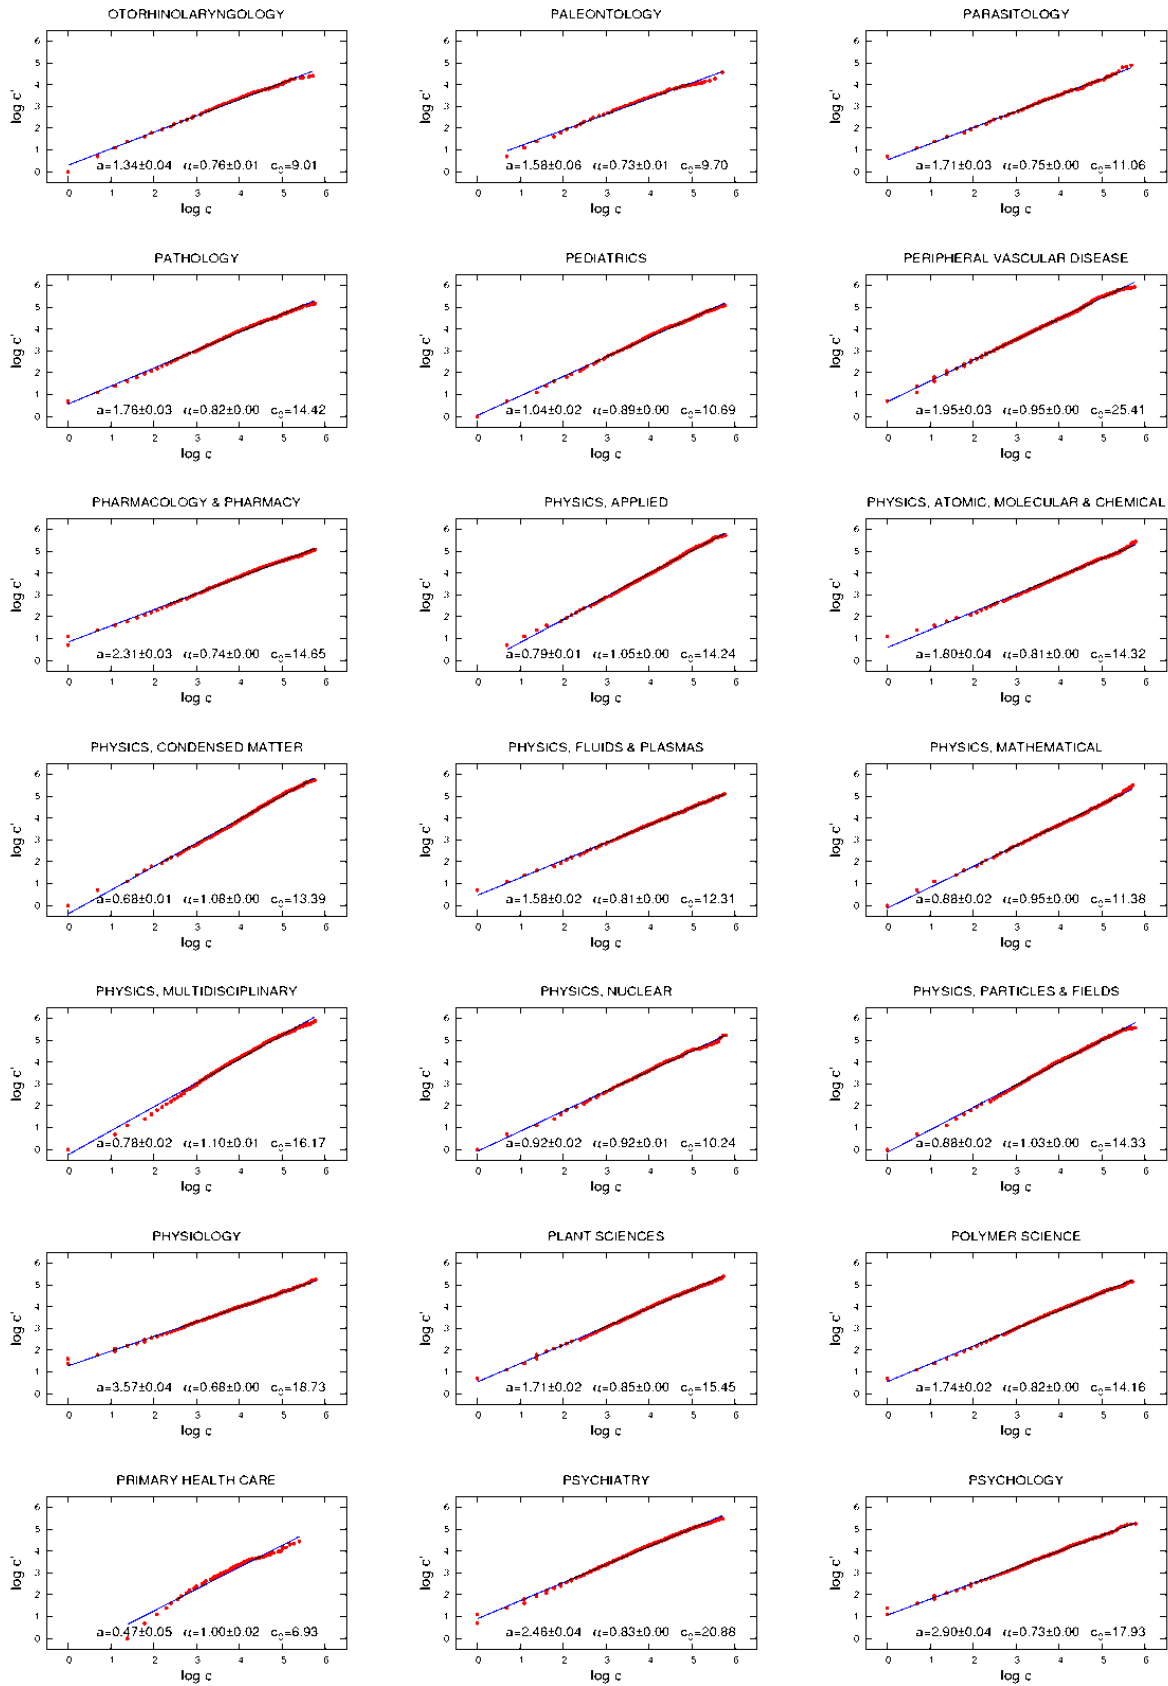

Figure S102: Publication year 2004.

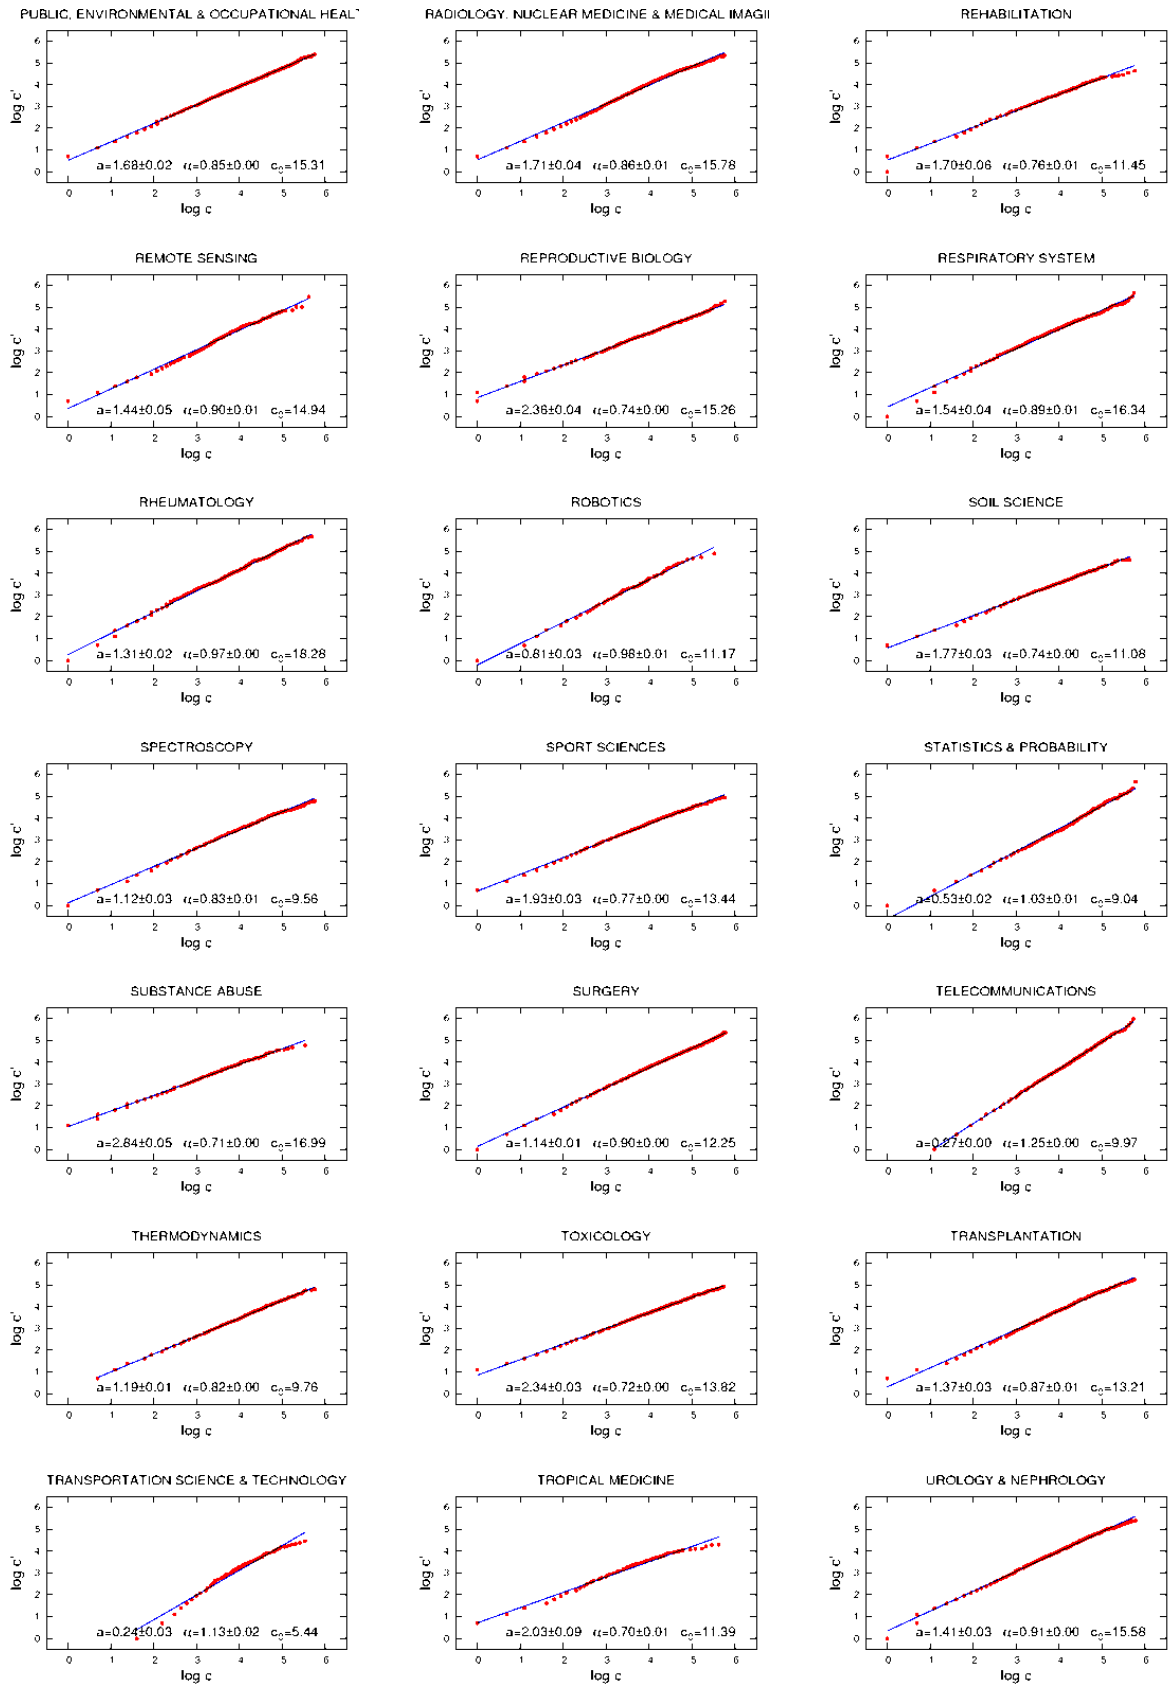

Figure S103: Publication year 2004.



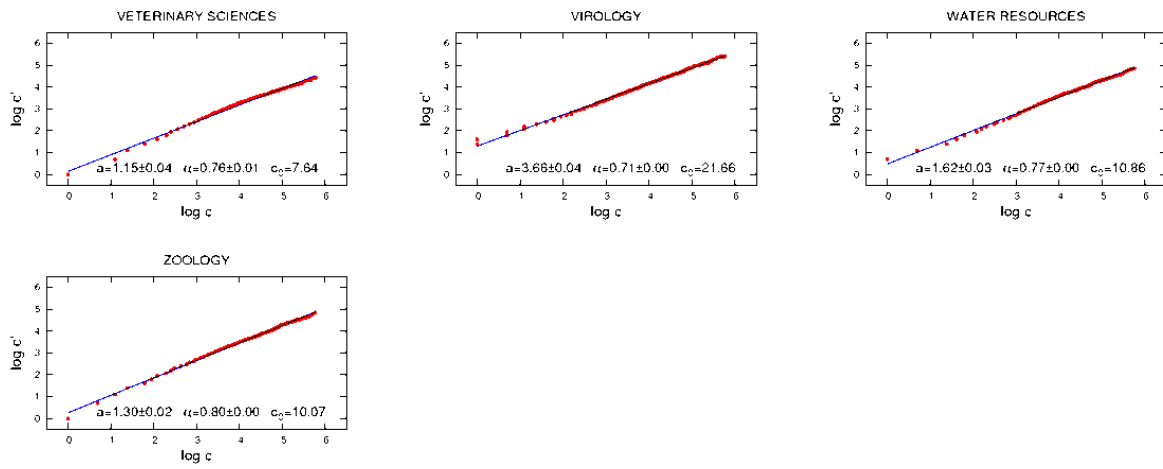

Figure S104: Publication year 2004.

| Subject-category                                 | $a$         | $\alpha$    | $\langle c \rangle$ | $N$    |
|--------------------------------------------------|-------------|-------------|---------------------|--------|
| ACOUSTICS                                        | 1.04 ± 0.02 | 0.83 ± 0.00 | 8.78                | 3,361  |
| AGRICULTURAL ECONOMICS & POLICY                  | 1.57 ± 0.09 | 0.68 ± 0.02 | 7.87                | 592    |
| AGRICULTURE, DAIRY & ANIMAL SCIENCE              | 1.16 ± 0.04 | 0.81 ± 0.01 | 8.99                | 3,868  |
| AGRICULTURE, MULTIDISCIPLINARY                   | 1.45 ± 0.05 | 0.82 ± 0.01 | 12.07               | 2,803  |
| AGRONOMY                                         | 1.36 ± 0.02 | 0.78 ± 0.00 | 10.00               | 4,767  |
| ALLERGY                                          | 2.16 ± 0.05 | 0.84 ± 0.01 | 18.97               | 1,617  |
| ANATOMY & MORPHOLOGY                             | 1.49 ± 0.05 | 0.81 ± 0.01 | 11.79               | 1,022  |
| ANDROLOGY                                        | 2.38 ± 0.08 | 0.64 ± 0.01 | 11.46               | 248    |
| ANESTHESIOLOGY                                   | 0.69 ± 0.03 | 0.99 ± 0.01 | 10.06               | 4,122  |
| ASTRONOMY & ASTROPHYSICS                         | 1.82 ± 0.01 | 0.92 ± 0.00 | 21.41               | 13,392 |
| AUTOMATION & CONTROL SYSTEMS                     | 0.62 ± 0.02 | 1.09 ± 0.01 | 12.91               | 3,449  |
| BEHAVIORAL SCIENCES                              | 3.60 ± 0.07 | 0.64 ± 0.01 | 16.95               | 3,426  |
| BIOCHEMICAL RESEARCH METHODS                     | 1.73 ± 0.08 | 0.90 ± 0.01 | 20.54               | 9,674  |
| BIOCHEMISTRY & MOLECULAR BIOLOGY                 | 2.84 ± 0.04 | 0.85 ± 0.00 | 26.18               | 43,556 |
| BIODIVERSITY CONSERVATION                        | 1.32 ± 0.04 | 0.89 ± 0.01 | 14.03               | 2,117  |
| BIOLOGY                                          | 1.08 ± 0.02 | 1.00 ± 0.01 | 16.13               | 5,302  |
| BIOPHYSICS                                       | 2.55 ± 0.04 | 0.78 ± 0.00 | 19.48               | 9,609  |
| BIOTECHNOLOGY & APPLIED MICROBIOLOGY             | 1.47 ± 0.04 | 0.95 ± 0.01 | 19.63               | 13,899 |
| CARDIAC & CARDIOVASCULAR SYSTEMS                 | 1.19 ± 0.02 | 1.03 ± 0.00 | 20.21               | 12,472 |
| CELL & TISSUE ENGINEERING                        | 2.78 ± 0.16 | 0.92 ± 0.02 | 31.40               | 322    |
| CELL BIOLOGY                                     | 3.17 ± 0.04 | 0.89 ± 0.00 | 32.72               | 17,610 |
| CHEMISTRY, ANALYTICAL                            | 2.11 ± 0.04 | 0.78 ± 0.00 | 15.04               | 14,446 |
| CHEMISTRY, APPLIED                               | 1.45 ± 0.04 | 0.81 ± 0.01 | 11.76               | 7,542  |
| CHEMISTRY, INORGANIC & NUCLEAR                   | 1.84 ± 0.03 | 0.76 ± 0.00 | 12.33               | 10,219 |
| CHEMISTRY, MEDICINAL                             | 2.41 ± 0.04 | 0.73 ± 0.00 | 14.62               | 6,444  |
| CHEMISTRY, MULTIDISCIPLINARY                     | 1.31 ± 0.03 | 1.02 ± 0.00 | 21.38               | 23,501 |
| CHEMISTRY, ORGANIC                               | 2.25 ± 0.04 | 0.75 ± 0.00 | 14.56               | 16,878 |
| CHEMISTRY, PHYSICAL                              | 1.55 ± 0.03 | 0.94 ± 0.00 | 18.52               | 29,735 |
| CLINICAL NEUROLOGY                               | 1.89 ± 0.03 | 0.85 ± 0.00 | 16.95               | 15,563 |
| COMPUTER SCIENCE, ARTIFICIAL INTELLIGENCE        | 0.71 ± 0.02 | 1.11 ± 0.01 | 16.77               | 4,690  |
| COMPUTER SCIENCE, CYBERNETICS                    | 0.66 ± 0.03 | 1.02 ± 0.01 | 10.42               | 1,068  |
| COMPUTER SCIENCE, HARDWARE & ARCHITECTURE        | 0.44 ± 0.01 | 1.11 ± 0.00 | 9.83                | 2,890  |
| COMPUTER SCIENCE, INFORMATION SYSTEMS            | 0.43 ± 0.01 | 1.15 ± 0.00 | 11.58               | 4,633  |
| COMPUTER SCIENCE, INTERDISCIPLINARY APPLICATIONS | 0.88 ± 0.01 | 0.93 ± 0.00 | 10.25               | 5,761  |
| COMPUTER SCIENCE, SOFTWARE ENGINEERING           | 0.52 ± 0.02 | 1.04 ± 0.01 | 8.85                | 4,718  |
| COMPUTER SCIENCE, THEORY & METHODS               | 0.54 ± 0.02 | 1.06 ± 0.01 | 9.59                | 3,918  |
| CONSTRUCTION & BUILDING TECHNOLOGY               | 0.91 ± 0.04 | 0.81 ± 0.01 | 7.36                | 2,302  |
| CRITICAL CARE MEDICINE                           | 1.35 ± 0.04 | 0.96 ± 0.01 | 18.15               | 3,116  |
| CRYSTALLOGRAPHY                                  | 0.60 ± 0.02 | 0.94 ± 0.01 | 8.10                | 7,032  |
| DENTISTRY, ORAL SURGERY & MEDICINE               | 1.30 ± 0.02 | 0.82 ± 0.00 | 11.11               | 5,040  |
| DERMATOLOGY                                      | 1.23 ± 0.04 | 0.82 ± 0.01 | 10.08               | 4,808  |
| DEVELOPMENTAL BIOLOGY                            | 3.63 ± 0.08 | 0.83 ± 0.01 | 31.01               | 3,289  |
| ECOLOGY                                          | 2.65 ± 0.02 | 0.76 ± 0.00 | 18.02               | 9,860  |
| EDUCATION, SCIENTIFIC DISCIPLINES                | 0.46 ± 0.02 | 0.99 ± 0.01 | 6.32                | 1,930  |
| ELECTROCHEMISTRY                                 | 2.09 ± 0.03 | 0.82 ± 0.00 | 17.34               | 5,539  |
| EMERGENCY MEDICINE                               | 0.63 ± 0.02 | 0.94 ± 0.01 | 7.59                | 1,661  |
| ENDOCRINOLOGY & METABOLISM                       | 2.59 ± 0.03 | 0.82 ± 0.00 | 21.68               | 11,259 |
| ENERGY & FUELS                                   | 0.87 ± 0.03 | 0.97 ± 0.01 | 11.90               | 5,977  |
| ENGINEERING, AEROSPACE                           | 0.38 ± 0.02 | 0.96 ± 0.01 | 4.70                | 1,902  |
| ENGINEERING, BIOMEDICAL                          | 2.23 ± 0.04 | 0.83 ± 0.00 | 18.82               | 4,717  |

Table S33: Publication year 2004.

| Subject-category                              | $a$         | $\alpha$    | $\langle c \rangle$ | $N$    |
|-----------------------------------------------|-------------|-------------|---------------------|--------|
| ENGINEERING, CHEMICAL                         | 1.14 ± 0.03 | 0.87 ± 0.01 | 10.78               | 13,612 |
| ENGINEERING, CIVIL                            | 0.58 ± 0.02 | 0.94 ± 0.01 | 7.00                | 5,972  |
| ENGINEERING, ELECTRICAL & ELECTRONIC          | 0.59 ± 0.01 | 1.07 ± 0.00 | 11.32               | 26,432 |
| ENGINEERING, ENVIRONMENTAL                    | 1.73 ± 0.04 | 0.87 ± 0.01 | 16.39               | 4,850  |
| ENGINEERING, GEOLOGICAL                       | 0.96 ± 0.03 | 0.80 ± 0.01 | 7.08                | 1,406  |
| ENGINEERING, INDUSTRIAL                       | 1.08 ± 0.02 | 0.81 ± 0.00 | 8.28                | 3,109  |
| ENGINEERING, MANUFACTURING                    | 1.03 ± 0.02 | 0.82 ± 0.01 | 8.28                | 3,385  |
| ENGINEERING, MARINE                           | 0.03 ± 0.01 | 1.30 ± 0.09 | 1.06                | 489    |
| ENGINEERING, MECHANICAL                       | 0.78 ± 0.03 | 0.87 ± 0.01 | 7.54                | 8,503  |
| ENGINEERING, MULTIDISCIPLINARY                | 0.61 ± 0.03 | 0.94 ± 0.01 | 7.30                | 4,443  |
| ENGINEERING, OCEAN                            | 0.57 ± 0.02 | 0.97 ± 0.01 | 7.50                | 874    |
| ENGINEERING, PETROLEUM                        | 0.17 ± 0.04 | 1.02 ± 0.05 | 2.14                | 1,613  |
| ENTOMOLOGY                                    | 1.32 ± 0.05 | 0.72 ± 0.01 | 7.76                | 4,371  |
| ENVIRONMENTAL SCIENCES                        | 1.84 ± 0.03 | 0.82 ± 0.00 | 14.88               | 16,938 |
| EVOLUTIONARY BIOLOGY                          | 3.39 ± 0.09 | 0.75 ± 0.01 | 22.88               | 3,170  |
| FISHERIES                                     | 2.37 ± 0.04 | 0.64 ± 0.00 | 10.79               | 3,495  |
| FOOD SCIENCE & TECHNOLOGY                     | 1.90 ± 0.03 | 0.74 ± 0.00 | 11.97               | 9,457  |
| FORESTRY                                      | 1.72 ± 0.02 | 0.76 ± 0.00 | 11.42               | 2,811  |
| GASTROENTEROLOGY & HEPATOLOGY                 | 1.46 ± 0.02 | 0.96 ± 0.00 | 19.03               | 7,518  |
| GENETICS & HEREDITY                           | 2.42 ± 0.04 | 0.89 ± 0.00 | 25.56               | 12,947 |
| GEOCHEMISTRY & GEOPHYSICS                     | 2.00 ± 0.03 | 0.80 ± 0.00 | 15.79               | 5,777  |
| GEOGRAPHY, PHYSICAL                           | 1.65 ± 0.07 | 0.84 ± 0.01 | 14.60               | 2,230  |
| GEOLOGY                                       | 1.73 ± 0.03 | 0.78 ± 0.00 | 12.42               | 1,604  |
| GEOSCIENCES, MULTIDISCIPLINARY                | 1.51 ± 0.02 | 0.80 ± 0.00 | 11.71               | 10,683 |
| GERIATRICS & GERONTOLOGY                      | 1.71 ± 0.04 | 0.84 ± 0.01 | 15.10               | 2,387  |
| HEALTH CARE SCIENCES & SERVICES               | 1.11 ± 0.01 | 0.89 ± 0.00 | 11.78               | 3,577  |
| HEMATOLOGY                                    | 2.08 ± 0.03 | 0.94 ± 0.00 | 25.88               | 9,875  |
| HISTORY & PHILOSOPHY OF SCIENCE               | 0.30 ± 0.02 | 1.00 ± 0.01 | 4.18                | 919    |
| IMAGING SCIENCE & PHOTOGRAPHIC TECHNOLOGY     | 1.23 ± 0.04 | 0.96 ± 0.01 | 16.28               | 1,136  |
| IMMUNOLOGY                                    | 2.03 ± 0.02 | 0.90 ± 0.00 | 22.17               | 17,048 |
| INFECTIOUS DISEASES                           | 2.27 ± 0.02 | 0.81 ± 0.00 | 18.47               | 7,727  |
| INSTRUMENTS & INSTRUMENTATION                 | 0.81 ± 0.01 | 0.89 ± 0.00 | 8.28                | 8,599  |
| INTEGRATIVE & COMPLEMENTARY MEDICINE          | 1.60 ± 0.09 | 0.74 ± 0.02 | 10.45               | 885    |
| LIMNOLOGY                                     | 1.98 ± 0.06 | 0.76 ± 0.01 | 13.27               | 1,208  |
| MARINE & FRESHWATER BIOLOGY                   | 2.72 ± 0.04 | 0.63 ± 0.00 | 12.33               | 6,939  |
| MATERIALS SCIENCE, BIOMATERIALS               | 3.07 ± 0.05 | 0.79 ± 0.00 | 23.02               | 2,082  |
| MATERIALS SCIENCE, CERAMICS                   | 0.91 ± 0.04 | 0.83 ± 0.01 | 7.87                | 3,443  |
| MATERIALS SCIENCE, CHARACTERIZATION & TESTING | 0.33 ± 0.03 | 1.00 ± 0.02 | 4.59                | 1,293  |
| MATERIALS SCIENCE, COATINGS & FILMS           | 1.69 ± 0.03 | 0.76 ± 0.00 | 11.03               | 4,993  |
| MATERIALS SCIENCE, COMPOSITES                 | 0.87 ± 0.02 | 0.91 ± 0.01 | 9.44                | 1,539  |
| MATERIALS SCIENCE, MULTIDISCIPLINARY          | 0.84 ± 0.01 | 1.02 ± 0.00 | 13.68               | 34,391 |
| MATERIALS SCIENCE, PAPER & WOOD               | 0.51 ± 0.03 | 0.87 ± 0.02 | 4.67                | 1,048  |
| MATERIALS SCIENCE, TEXTILES                   | 0.33 ± 0.02 | 1.04 ± 0.02 | 5.72                | 949    |
| MATHEMATICAL & COMPUTATIONAL BIOLOGY          | 1.22 ± 0.07 | 1.02 ± 0.01 | 20.05               | 2,304  |
| MATHEMATICS                                   | 0.42 ± 0.01 | 0.92 ± 0.00 | 4.61                | 13,390 |
| MATHEMATICS, APPLIED                          | 0.53 ± 0.01 | 0.95 ± 0.00 | 6.65                | 11,863 |
| MATHEMATICS, INTERDISCIPLINARY APPLICATIONS   | 0.83 ± 0.02 | 0.95 ± 0.01 | 10.37               | 4,370  |
| MECHANICS                                     | 1.05 ± 0.01 | 0.85 ± 0.00 | 9.49                | 10,165 |
| MEDICAL ETHICS                                | 0.45 ± 0.04 | 0.99 ± 0.02 | 6.27                | 443    |
| MEDICAL INFORMATICS                           | 1.04 ± 0.05 | 0.92 ± 0.01 | 11.66               | 1,196  |

Table S34: Publication year 2004.

| Subject-category                              | $a$             | $\alpha$        | $\langle c \rangle$ | $N$    |
|-----------------------------------------------|-----------------|-----------------|---------------------|--------|
| MEDICAL LABORATORY TECHNOLOGY                 | $0.96 \pm 0.02$ | $0.93 \pm 0.00$ | 11.13               | 2,210  |
| MEDICINE, GENERAL & INTERNAL                  | $0.12 \pm 0.00$ | $1.63 \pm 0.01$ | 19.97               | 14,814 |
| MEDICINE, LEGAL                               | $0.69 \pm 0.04$ | $0.89 \pm 0.01$ | 7.02                | 993    |
| MEDICINE, RESEARCH & EXPERIMENTAL             | $0.95 \pm 0.03$ | $1.11 \pm 0.01$ | 20.29               | 8,861  |
| METALLURGY & METALLURGICAL ENGINEERING        | $0.65 \pm 0.03$ | $0.95 \pm 0.01$ | 8.12                | 8,077  |
| METEOROLOGY & ATMOSPHERIC SCIENCES            | $1.95 \pm 0.03$ | $0.82 \pm 0.00$ | 15.86               | 6,720  |
| MICROBIOLOGY                                  | $3.18 \pm 0.03$ | $0.73 \pm 0.00$ | 19.84               | 13,224 |
| MICROSCOPY                                    | $1.41 \pm 0.06$ | $0.77 \pm 0.01$ | 9.90                | 674    |
| MINERALOGY                                    | $1.64 \pm 0.05$ | $0.77 \pm 0.01$ | 10.95               | 1,724  |
| MINING & MINERAL PROCESSING                   | $0.57 \pm 0.03$ | $0.90 \pm 0.01$ | 6.01                | 1,553  |
| MULTIDISCIPLINARY SCIENCES                    | $1.39 \pm 0.06$ | $1.23 \pm 0.01$ | 48.85               | 10,909 |
| MYCOLOGY                                      | $1.34 \pm 0.06$ | $0.81 \pm 0.01$ | 10.45               | 1,019  |
| NANOSCIENCE & NANOTECHNOLOGY                  | $1.35 \pm 0.03$ | $1.01 \pm 0.00$ | 20.63               | 7,183  |
| NEUROIMAGING                                  | $2.92 \pm 0.07$ | $0.84 \pm 0.01$ | 25.95               | 1,430  |
| NEUROSCIENCES                                 | $3.22 \pm 0.04$ | $0.78 \pm 0.00$ | 23.48               | 23,796 |
| NUCLEAR SCIENCE & TECHNOLOGY                  | $0.63 \pm 0.01$ | $0.87 \pm 0.00$ | 6.03                | 7,589  |
| NURSING                                       | $0.95 \pm 0.05$ | $0.81 \pm 0.01$ | 7.86                | 2,365  |
| NUTRITION & DIETETICS                         | $2.37 \pm 0.03$ | $0.80 \pm 0.00$ | 18.44               | 4,767  |
| OBSTETRICS & GYNECOLOGY                       | $1.31 \pm 0.03$ | $0.84 \pm 0.00$ | 11.78               | 7,384  |
| OCEANOGRAPHY                                  | $2.43 \pm 0.05$ | $0.70 \pm 0.00$ | 13.66               | 4,159  |
| ONCOLOGY                                      | $2.38 \pm 0.03$ | $0.87 \pm 0.00$ | 23.44               | 19,647 |
| OPERATIONS RESEARCH & MANAGEMENT SCIENCE      | $1.13 \pm 0.01$ | $0.86 \pm 0.00$ | 10.69               | 3,902  |
| OPHTHALMOLOGY                                 | $1.21 \pm 0.02$ | $0.87 \pm 0.00$ | 11.97               | 6,359  |
| OPTICS                                        | $1.09 \pm 0.02$ | $0.91 \pm 0.00$ | 12.16               | 12,693 |
| ORNITHOLOGY                                   | $1.09 \pm 0.02$ | $0.80 \pm 0.01$ | 8.36                | 928    |
| ORTHOPEDICS                                   | $1.30 \pm 0.02$ | $0.87 \pm 0.00$ | 13.00               | 5,607  |
| OTORHINOLARYNGOLOGY                           | $1.34 \pm 0.04$ | $0.76 \pm 0.01$ | 9.01                | 3,235  |
| PALEONTOLOGY                                  | $1.58 \pm 0.06$ | $0.73 \pm 0.01$ | 9.70                | 1,559  |
| PARASITOLOGY                                  | $1.71 \pm 0.03$ | $0.75 \pm 0.00$ | 11.06               | 2,239  |
| PATHOLOGY                                     | $1.76 \pm 0.03$ | $0.82 \pm 0.00$ | 14.42               | 5,694  |
| PEDIATRICS                                    | $1.04 \pm 0.02$ | $0.89 \pm 0.00$ | 10.69               | 9,553  |
| PERIPHERAL VASCULAR DISEASE                   | $1.95 \pm 0.03$ | $0.95 \pm 0.00$ | 25.41               | 8,353  |
| PHARMACOLOGY & PHARMACY                       | $2.31 \pm 0.03$ | $0.74 \pm 0.00$ | 14.65               | 20,991 |
| PHYSICS, APPLIED                              | $0.79 \pm 0.01$ | $1.05 \pm 0.00$ | 14.24               | 28,999 |
| PHYSICS, ATOMIC, MOLECULAR & CHEMICAL         | $1.80 \pm 0.04$ | $0.81 \pm 0.00$ | 14.32               | 12,973 |
| PHYSICS, CONDENSED MATTER                     | $0.68 \pm 0.01$ | $1.08 \pm 0.00$ | 13.39               | 22,654 |
| PHYSICS, FLUIDS & PLASMAS                     | $1.58 \pm 0.02$ | $0.81 \pm 0.00$ | 12.31               | 5,648  |
| PHYSICS, MATHEMATICAL                         | $0.88 \pm 0.02$ | $0.95 \pm 0.00$ | 11.38               | 6,624  |
| PHYSICS, MULTIDISCIPLINARY                    | $0.78 \pm 0.02$ | $1.10 \pm 0.01$ | 16.17               | 15,438 |
| PHYSICS, NUCLEAR                              | $0.92 \pm 0.02$ | $0.92 \pm 0.01$ | 10.24               | 4,987  |
| PHYSICS, PARTICLES & FIELDS                   | $0.88 \pm 0.02$ | $1.03 \pm 0.00$ | 14.33               | 8,759  |
| PHYSIOLOGY                                    | $3.57 \pm 0.04$ | $0.68 \pm 0.00$ | 18.73               | 7,846  |
| PLANT SCIENCES                                | $1.71 \pm 0.02$ | $0.85 \pm 0.00$ | 15.45               | 12,844 |
| POLYMER SCIENCE                               | $1.74 \pm 0.02$ | $0.82 \pm 0.00$ | 14.16               | 11,170 |
| PRIMARY HEALTH CARE                           | $0.47 \pm 0.05$ | $1.00 \pm 0.02$ | 6.93                | 1,140  |
| PSYCHIATRY                                    | $2.46 \pm 0.04$ | $0.83 \pm 0.00$ | 20.88               | 9,108  |
| PSYCHOLOGY                                    | $2.90 \pm 0.04$ | $0.73 \pm 0.00$ | 17.93               | 2,942  |
| PUBLIC, ENVIRONMENTAL & OCCUPATIONAL HEALTH   | $1.68 \pm 0.02$ | $0.85 \pm 0.00$ | 15.31               | 10,171 |
| RADIOLOGY, NUCLEAR MEDICINE & MEDICAL IMAGING | $1.71 \pm 0.04$ | $0.86 \pm 0.01$ | 15.78               | 12,165 |
| REHABILITATION                                | $1.70 \pm 0.06$ | $0.76 \pm 0.01$ | 11.45               | 1,863  |

Table S35: Publication year 2004.

| Subject-category                    | $a$                               | $\alpha$                          | $\langle c \rangle$ | $N$             |
|-------------------------------------|-----------------------------------|-----------------------------------|---------------------|-----------------|
| REMOTE SENSING                      | $1.44 \pm 0.05$                   | $0.90 \pm 0.01$                   | 14.94               | 1,301           |
| REPRODUCTIVE BIOLOGY                | $2.36 \pm 0.04$                   | $0.74 \pm 0.00$                   | 15.26               | 3,710           |
| RESPIRATORY SYSTEM                  | $1.54 \pm 0.04$                   | $0.89 \pm 0.01$                   | 16.34               | 6,259           |
| RHEUMATOLOGY                        | $1.31 \pm 0.02$                   | $0.97 \pm 0.00$                   | 18.28               | 3,058           |
| ROBOTICS                            | $0.81 \pm 0.03$                   | $0.98 \pm 0.01$                   | 11.17               | 497             |
| SOIL SCIENCE                        | $1.77 \pm 0.03$                   | $0.74 \pm 0.00$                   | 11.08               | 2,766           |
| SPECTROSCOPY                        | $1.12 \pm 0.03$                   | $0.83 \pm 0.01$                   | 9.56                | 6,648           |
| SPORT SCIENCES                      | $1.93 \pm 0.03$                   | $0.77 \pm 0.00$                   | 13.44               | 4,701           |
| STATISTICS & PROBABILITY            | $0.53 \pm 0.02$                   | $1.03 \pm 0.01$                   | 9.04                | 4,922           |
| SUBSTANCE ABUSE                     | $2.84 \pm 0.05$                   | $0.71 \pm 0.00$                   | 16.99               | 1,049           |
| SURGERY                             | $1.14 \pm 0.01$                   | $0.90 \pm 0.00$                   | 12.25               | 22,687          |
| TELECOMMUNICATIONS                  | $0.27 \pm 0.00$                   | $1.25 \pm 0.00$                   | 9.97                | 5,196           |
| THERMODYNAMICS                      | $1.19 \pm 0.01$                   | $0.82 \pm 0.00$                   | 9.76                | 3,809           |
| TOXICOLOGY                          | $2.34 \pm 0.03$                   | $0.72 \pm 0.00$                   | 13.82               | 6,214           |
| TRANSPLANTATION                     | $1.37 \pm 0.03$                   | $0.87 \pm 0.01$                   | 13.21               | 4,665           |
| TRANSPORTATION SCIENCE & TECHNOLOGY | $0.24 \pm 0.03$                   | $1.13 \pm 0.02$                   | 5.44                | 1,562           |
| TROPICAL MEDICINE                   | $2.03 \pm 0.09$                   | $0.70 \pm 0.01$                   | 11.39               | 1,298           |
| UROLOGY & NEPHROLOGY                | $1.41 \pm 0.03$                   | $0.91 \pm 0.00$                   | 15.58               | 7,784           |
| VETERINARY SCIENCES                 | $1.15 \pm 0.04$                   | $0.76 \pm 0.01$                   | 7.64                | 7,967           |
| VIROLOGY                            | $3.66 \pm 0.04$                   | $0.71 \pm 0.00$                   | 21.66               | 4,713           |
| WATER RESOURCES                     | $1.62 \pm 0.03$                   | $0.77 \pm 0.00$                   | 10.86               | 5,490           |
| ZOOLOGY                             | $1.30 \pm 0.02$                   | $0.80 \pm 0.00$                   | 10.07               | 6,684           |
| <b>TOTAL</b>                        | <b><math>1.00 \pm 0.00</math></b> | <b><math>1.00 \pm 0.00</math></b> | <b>15.79</b>        | <b>1205,646</b> |

Table S36: Publication year 2004.

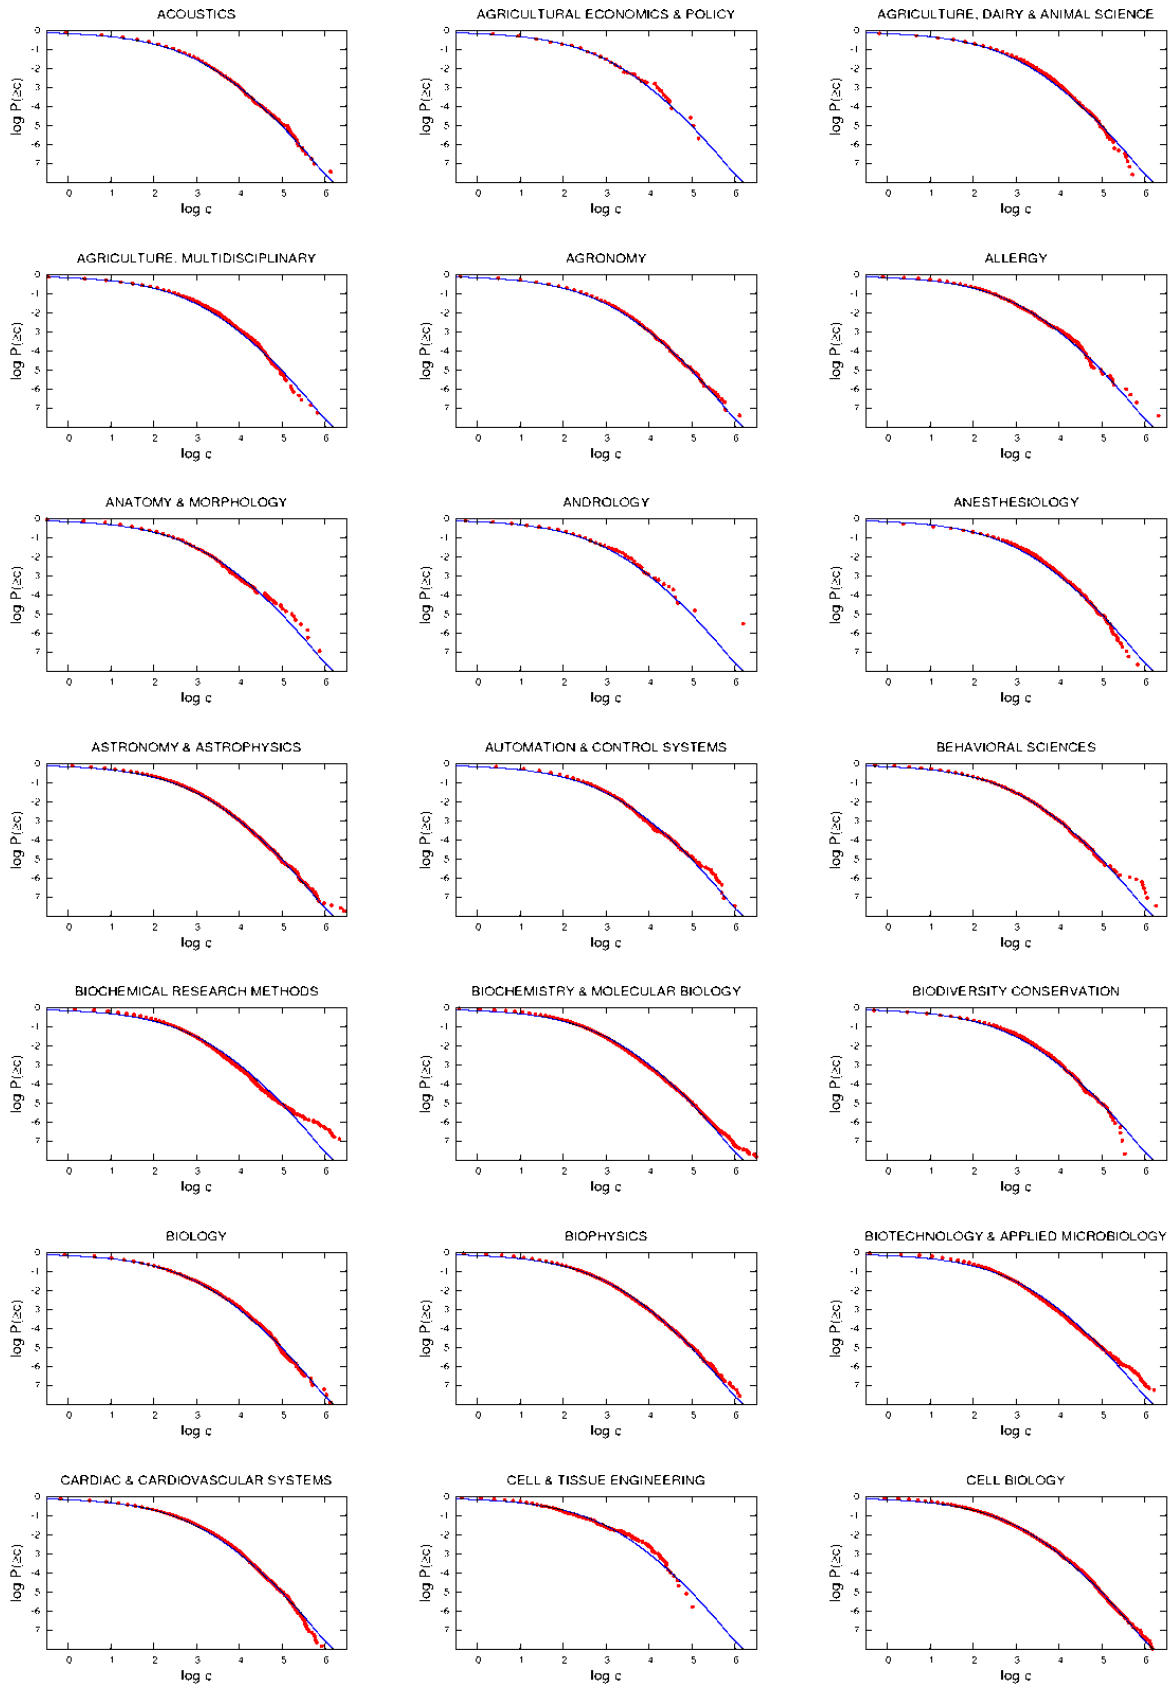

Figure S105: Publication year 2004.

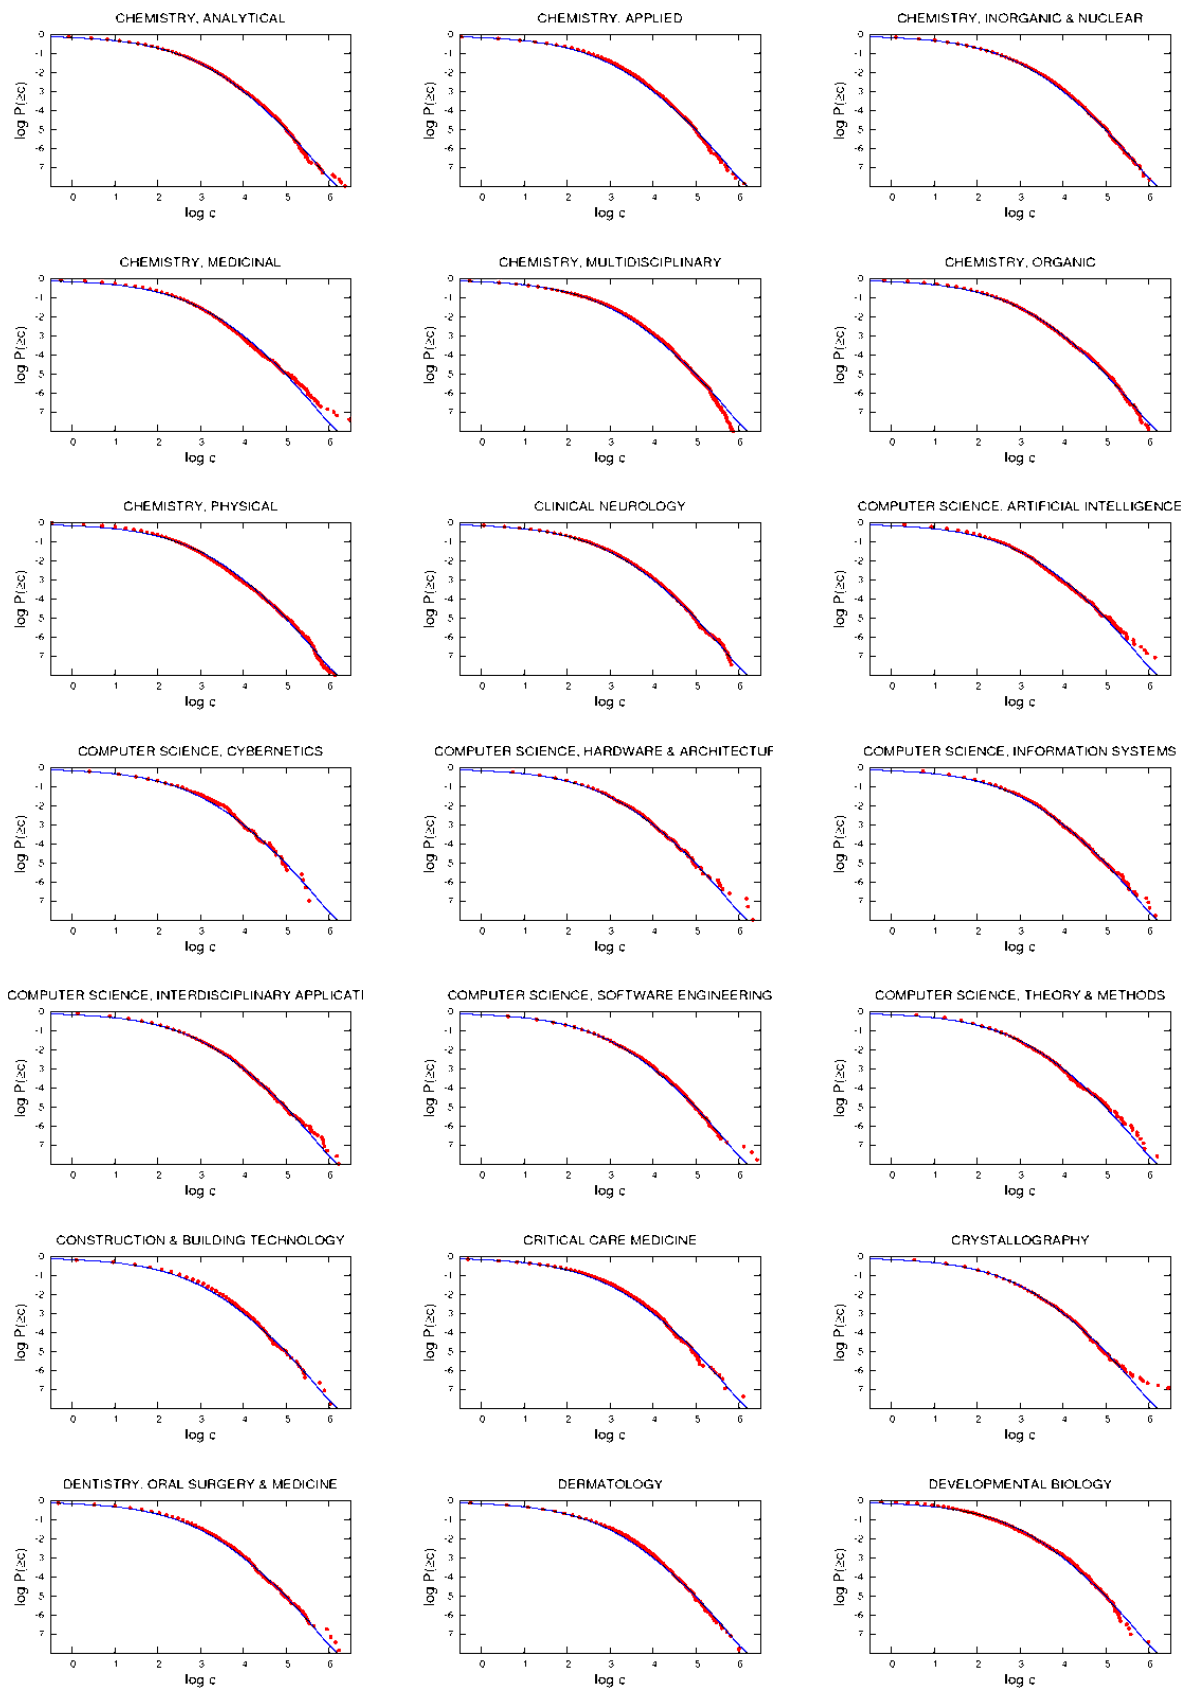

Figure S106: Publication year 2004.

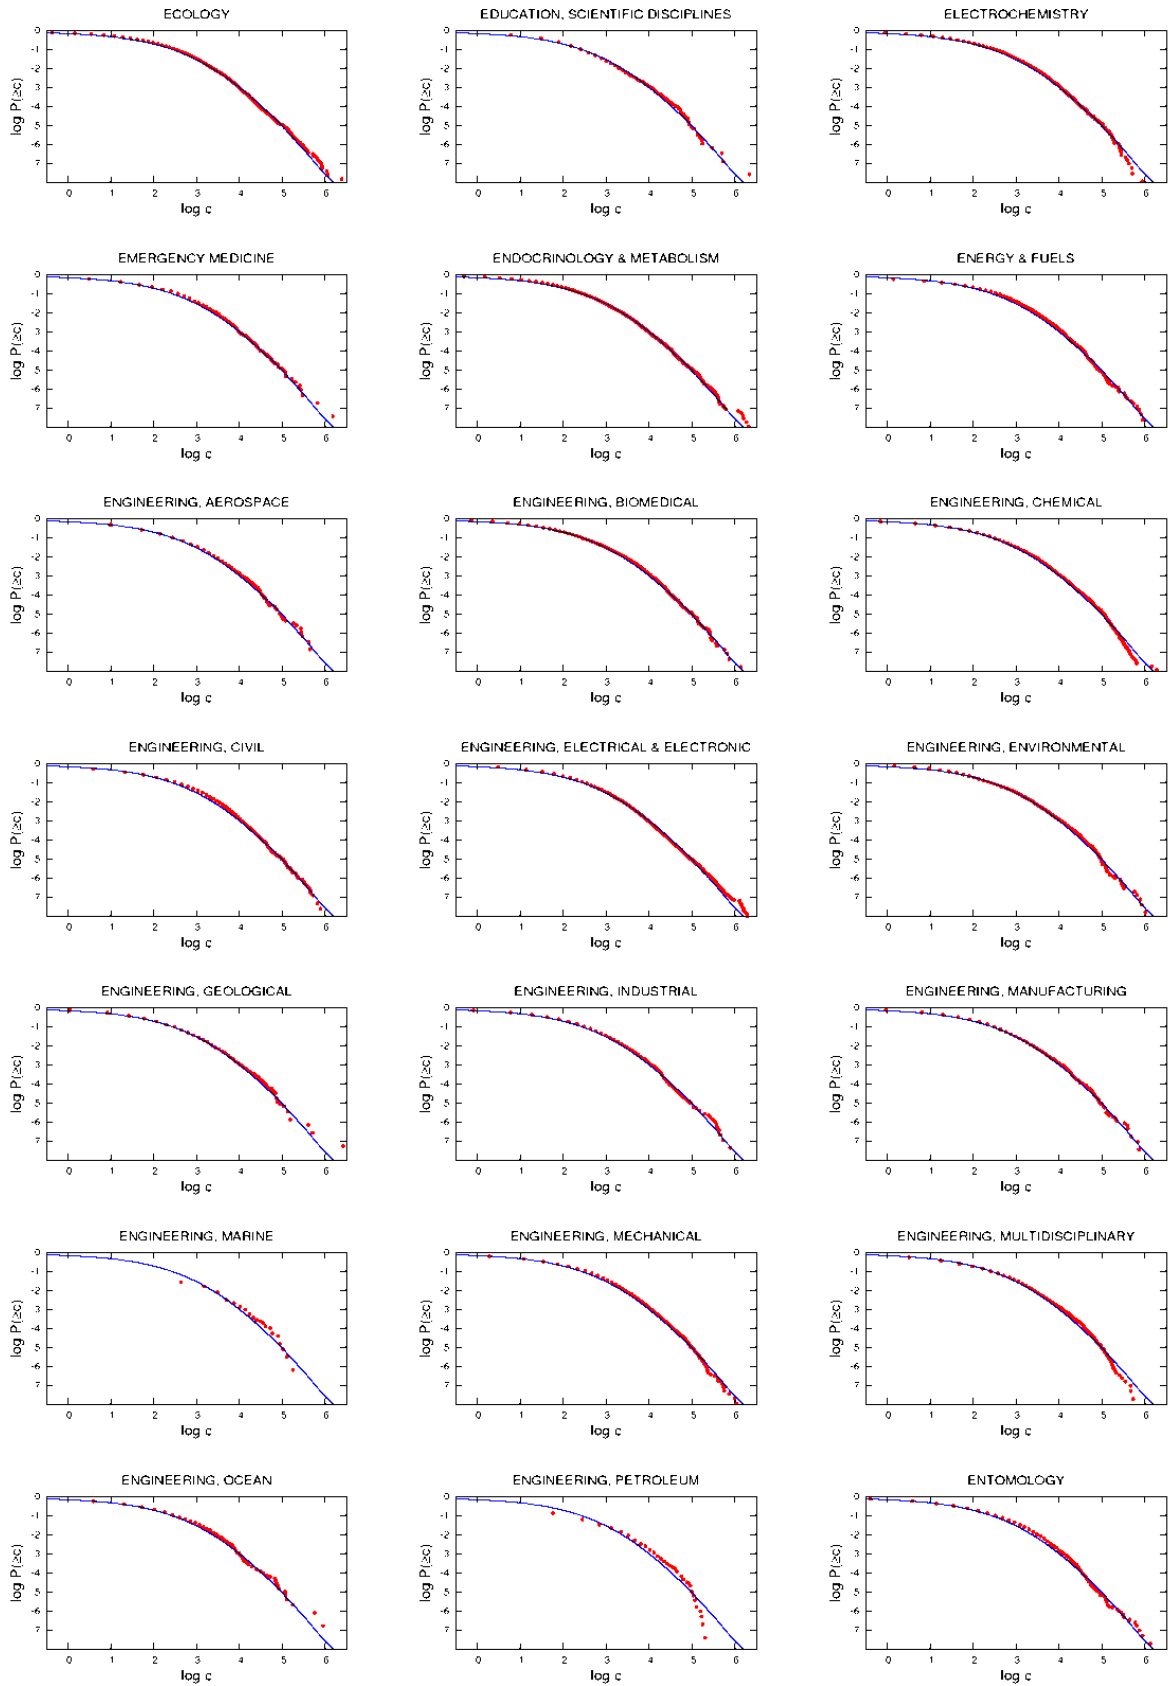

Figure S107: Publication year 2004.



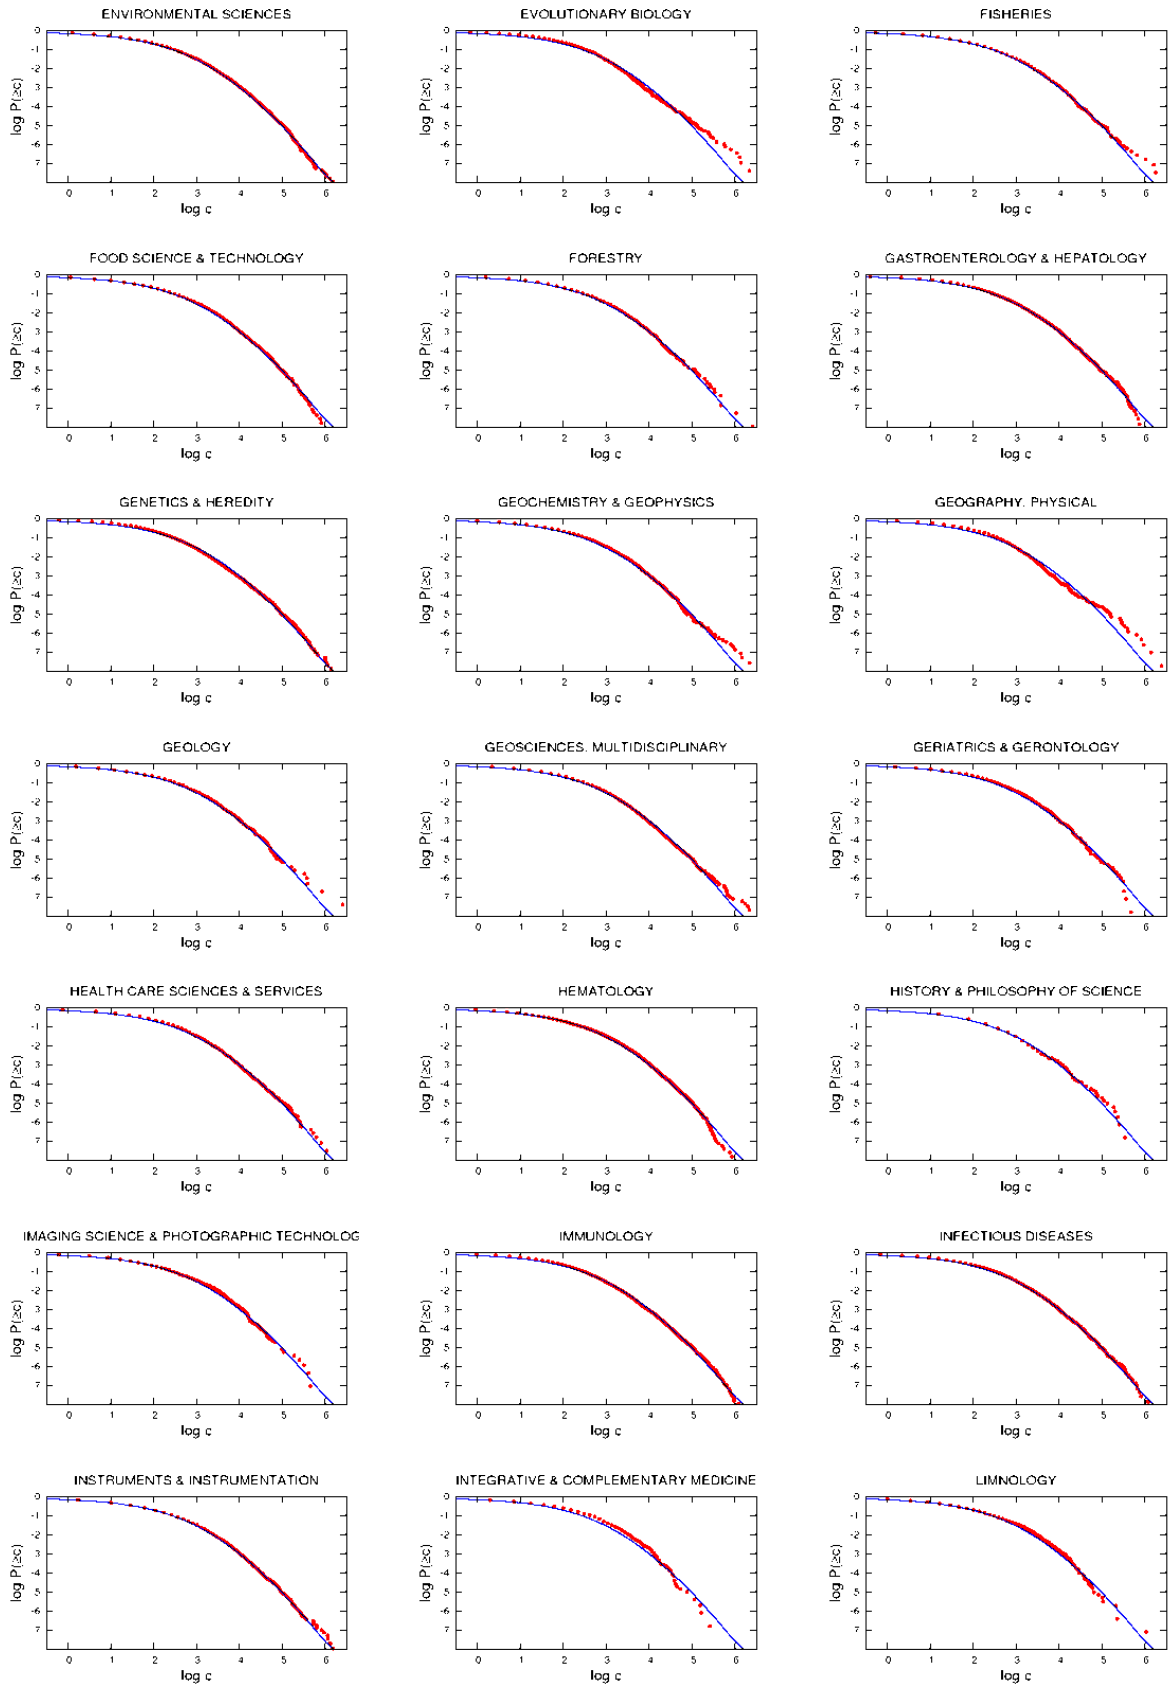

Figure S108: Publication year 2004.

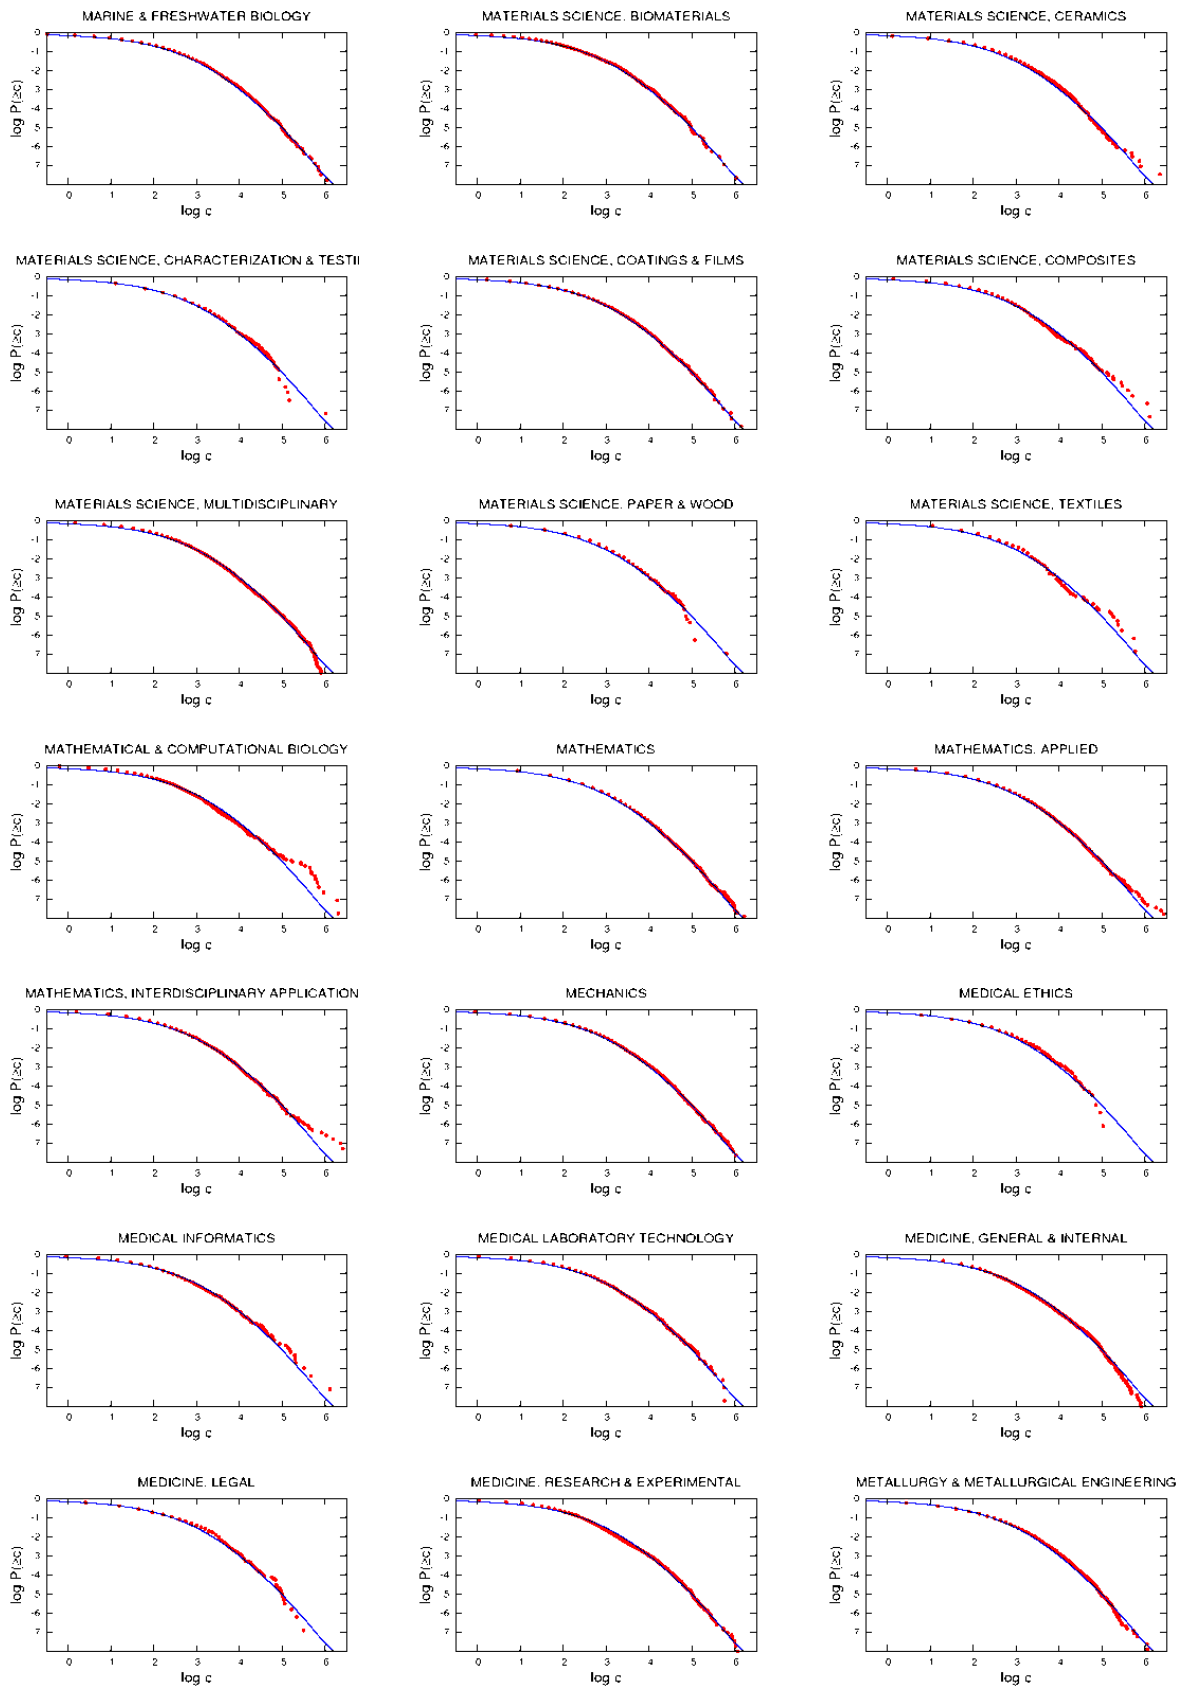

Figure S109: Publication year 2004.

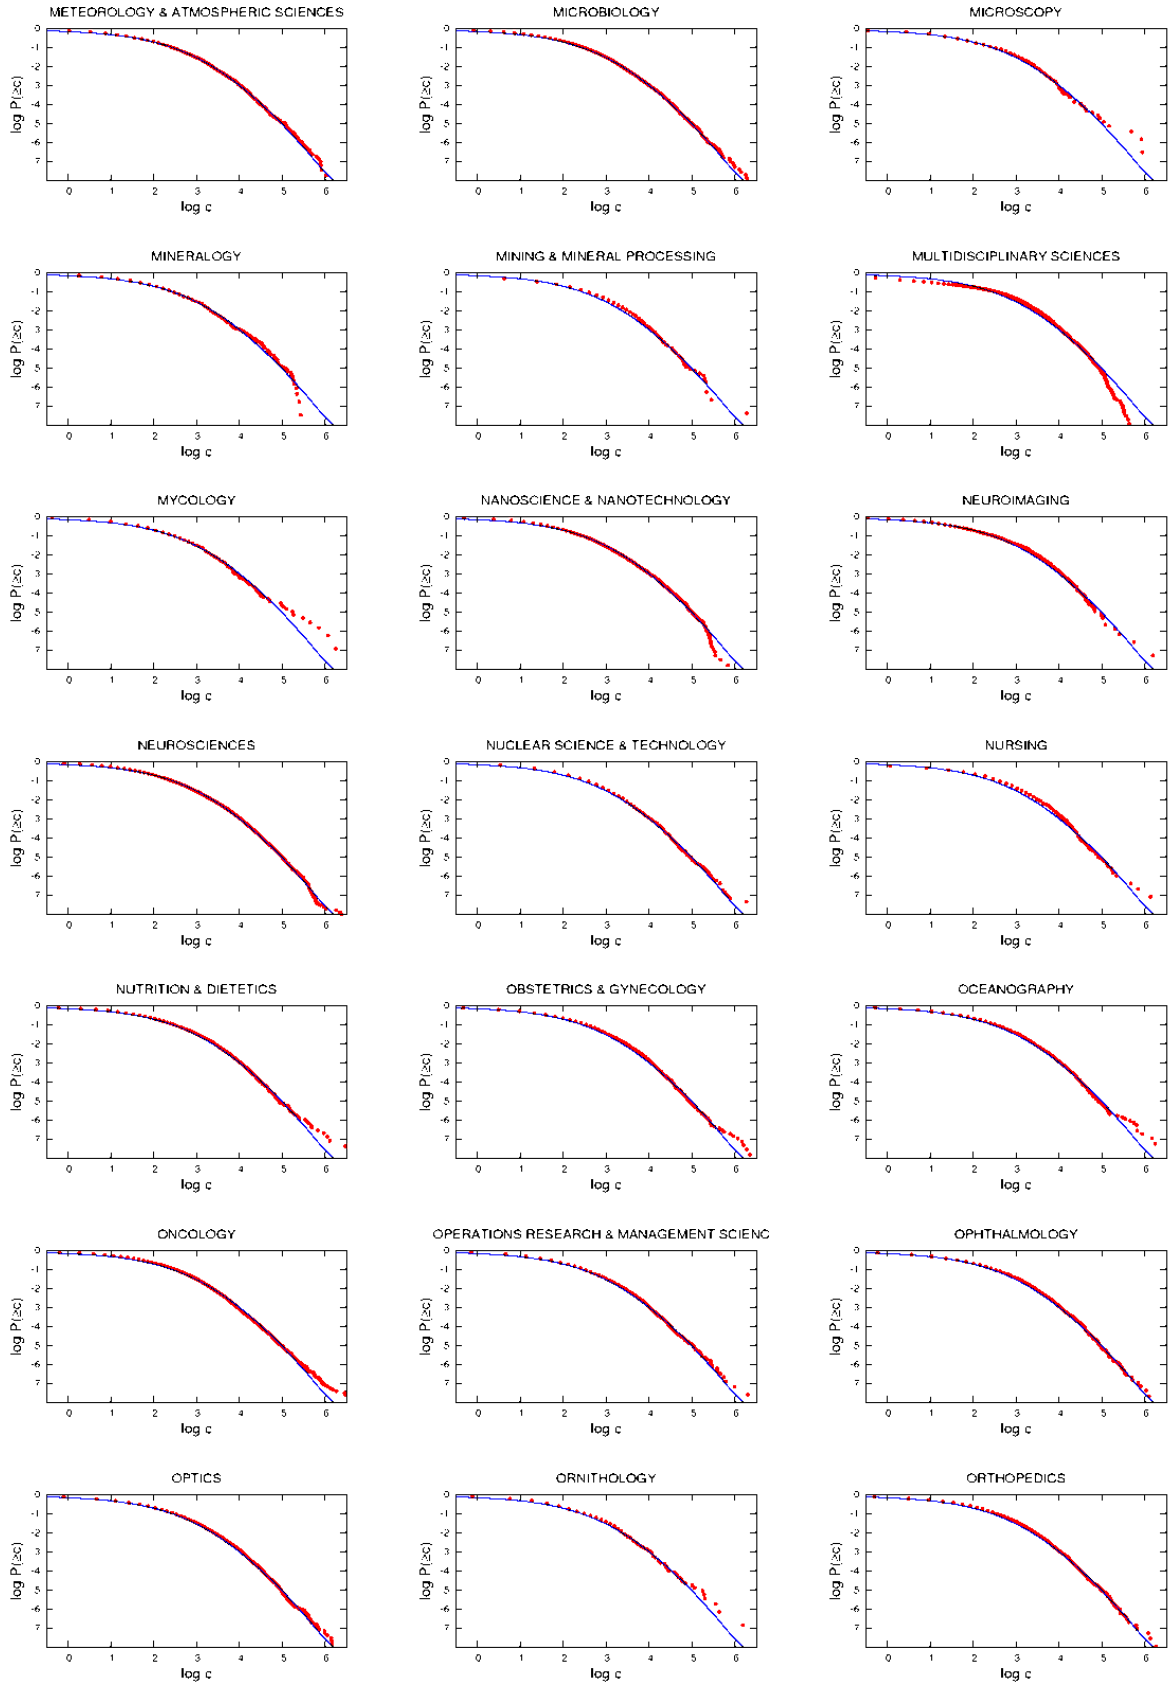

Figure S110: Publication year 2004.

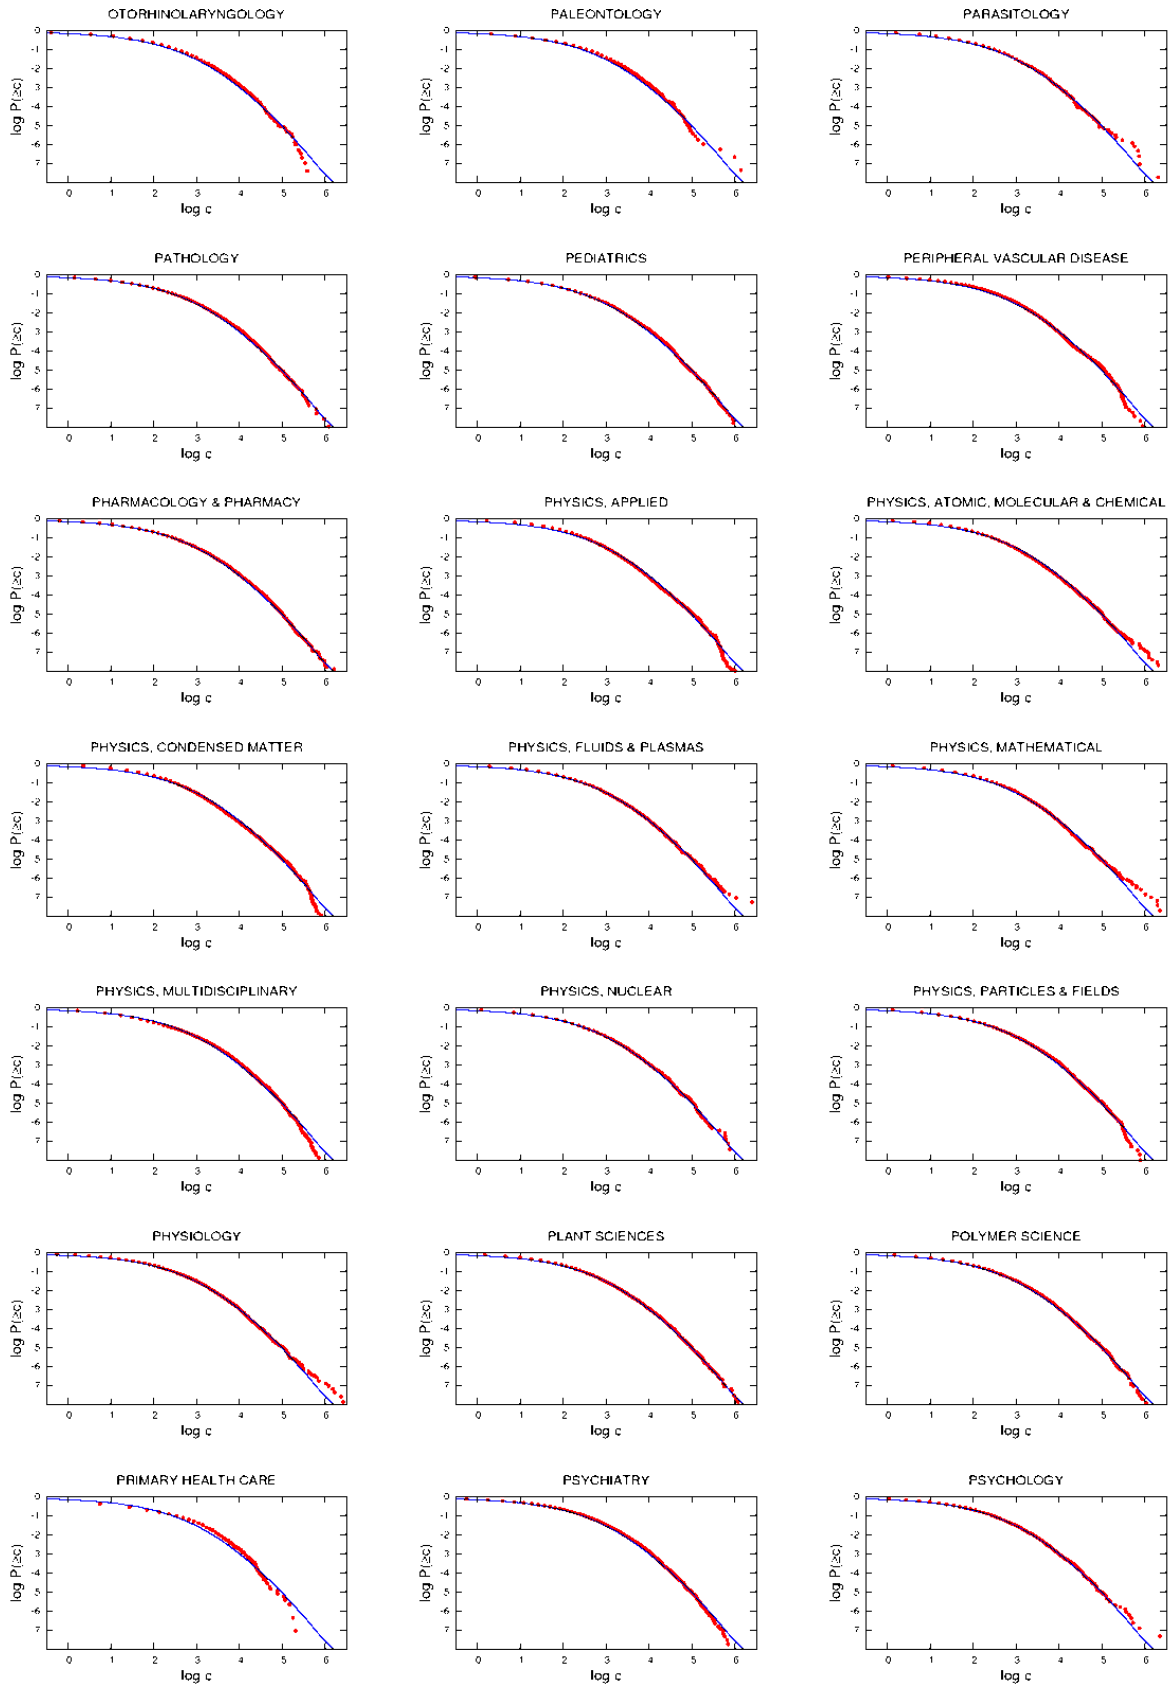

Figure S111: Publication year 2004.

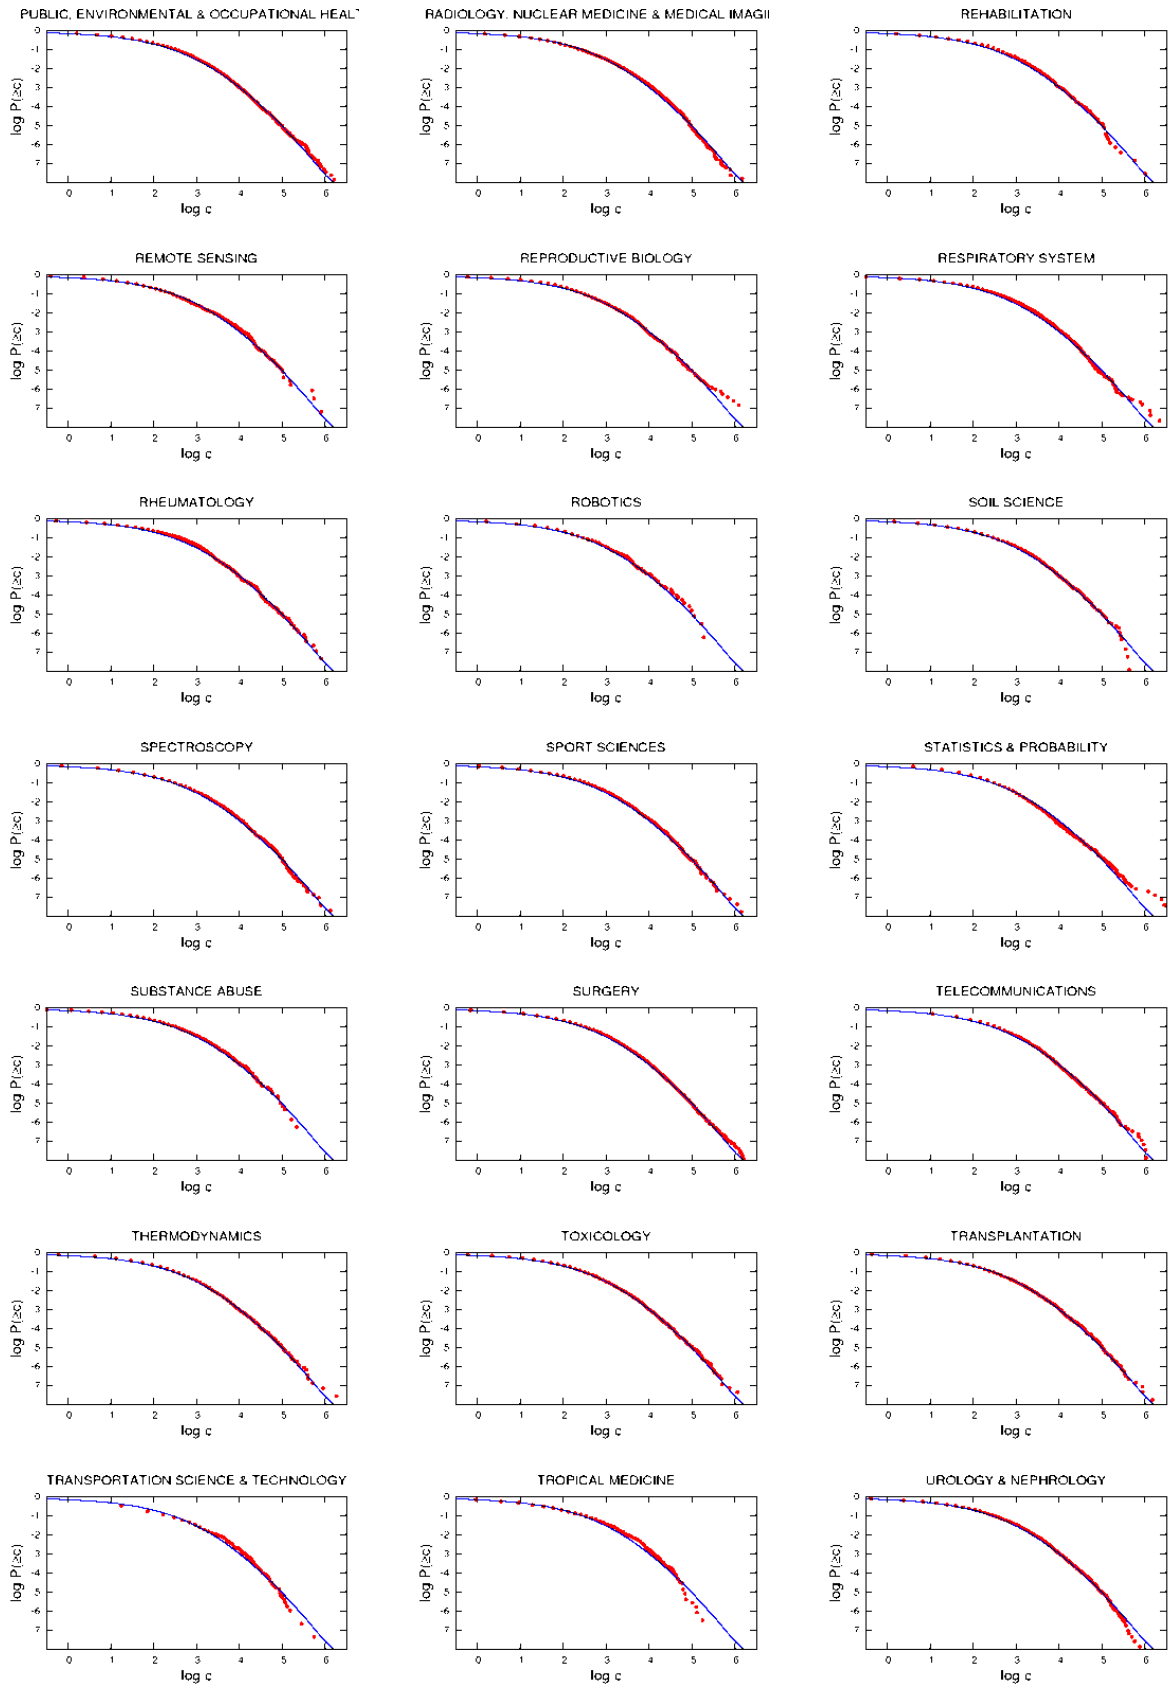

Figure S112: Publication year 2004.

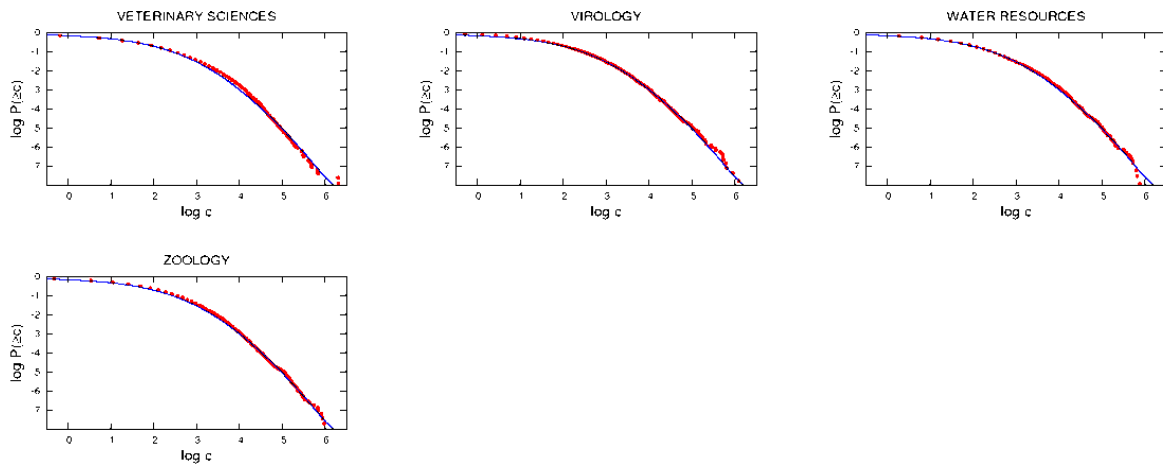

Figure S113: Publication year 2004.

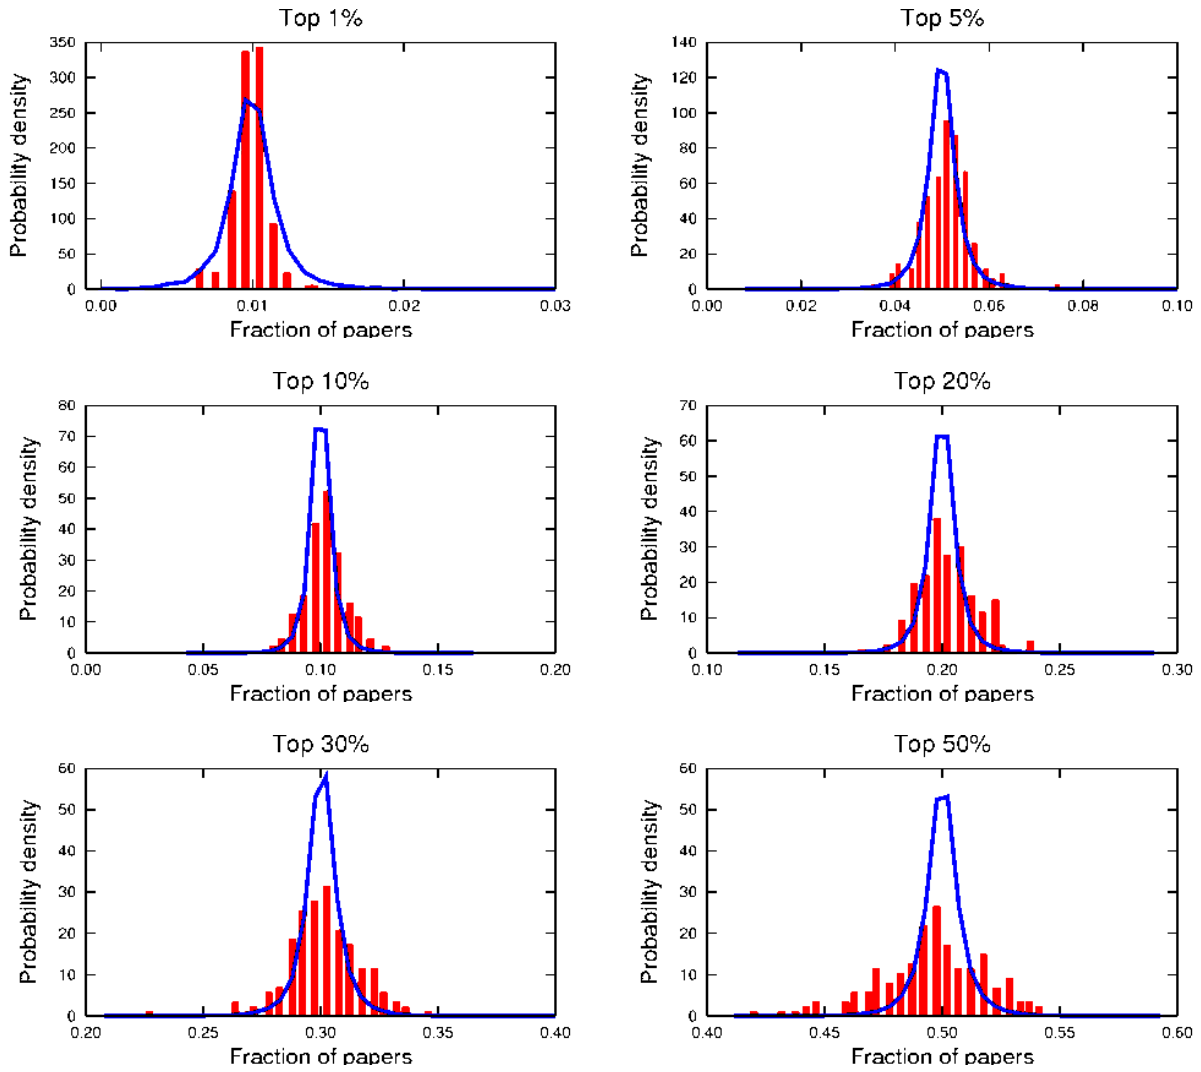

Figure S114: Publication year 2004.
