# Supplementary material for: A Reverse Engineering Approach to the Suppression of Citation Biases Reveals Universal Properties of Citation Distributions
Source: PubMed Central journal article supplement (PMC3315498; doi:10.1371/journal.pone.0033833), 2012-03-29
Supplement: pone.0033833.s008.pdf [file pone.0033833.s008.pdf]

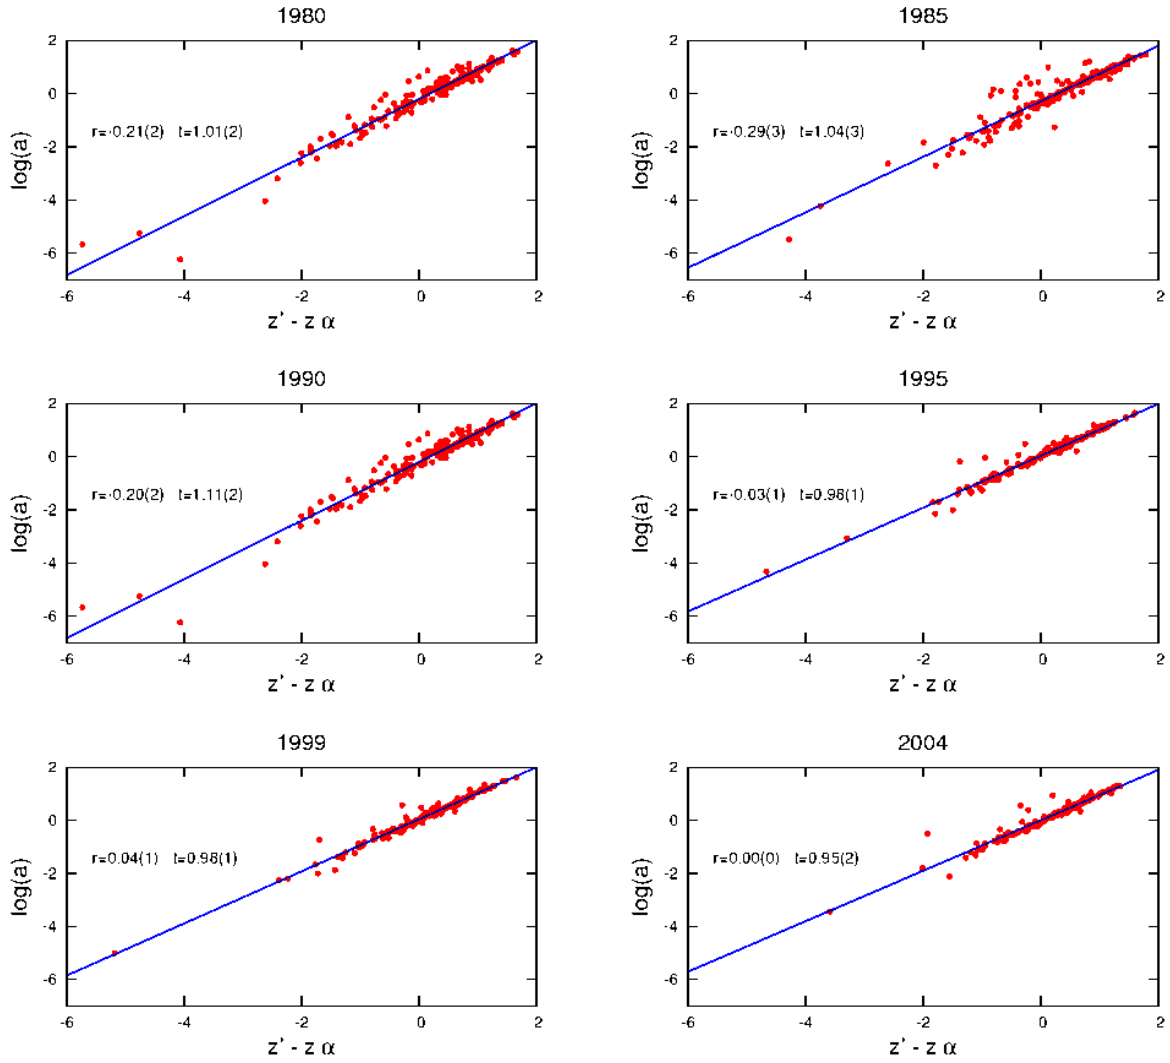

Figure S115:  $\log(a) = r + t(z' - z\alpha)$ .

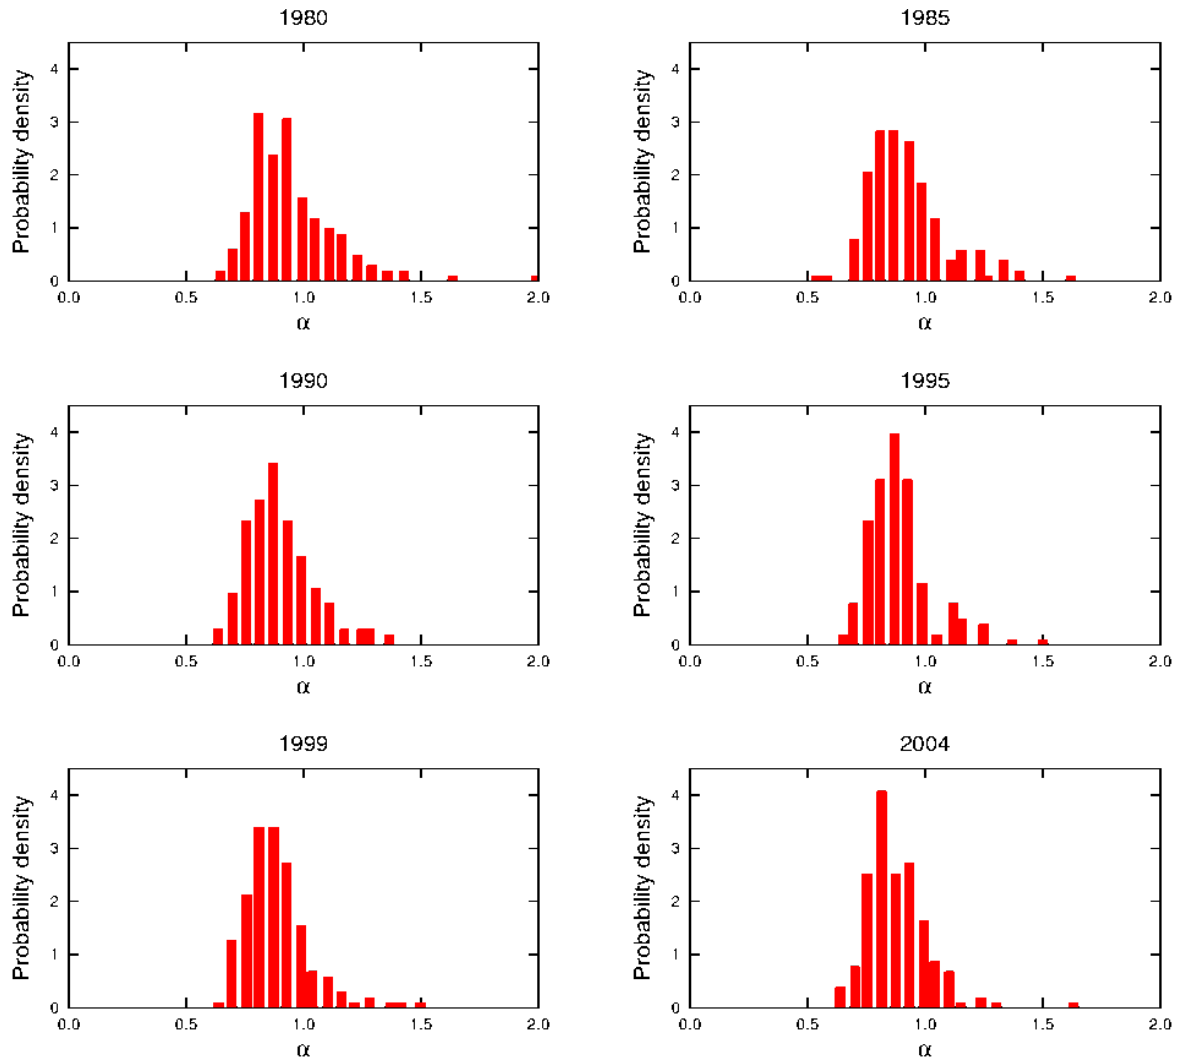

Figure S116: Probability density distribution of the transformation exponent  $\alpha$  for various publication years.
