# Supplementary material for: A Reverse Engineering Approach to the Suppression of Citation Biases Reveals Universal Properties of Citation Distributions
Source: PubMed Central journal article supplement (PMC3315498; doi:10.1371/journal.pone.0033833), 2012-03-29
Supplement: pone.0033833.s009.pdf [file pone.0033833.s009.pdf]

# Fitting citation distributions with log-normal distributions

We fit the citation distributions of all subject-categories and publication years with log-normal distributions. We adopt two different ways for the determination of the parameters of the fitted log-normal distributions.

## Parameters determined from the dataset

We consider the discrete log-normal distribution

$$P(c) = Q \frac{1}{c s \sqrt{2\pi}} e^{-[\log(c)-z]^2/(2s^2)}$$

for any value of  $c > 0$ . For  $c = 0$ ,  $P(0)$  is set equal to the fraction of papers with zero citations in the dataset that we are fitting.  $Q$  is the normalization factor for which  $Q \sum_{c=1}^{C_{max}} P(c) = 1$ . We determine the parameters of each log-normal distribution directly from data, by using the values of the average value  $\langle c \rangle$  and the variance  $\sigma$  in the following equations

$$z = \log(\langle c \rangle) - s^2/2$$

and

$$s^2 = \log \left[ 1 + \left( \frac{\sigma}{\langle c \rangle} \right)^2 \right].$$

## Best estimation of the parameters

We consider the discrete log-normal distribution

$$P(c) = Q \int_c^{c+1} dx \frac{1}{x s \sqrt{2\pi}} e^{-[\log(x)-z]^2/(2s^2)}$$

with  $Q$  equal to the normalization factor for which  $Q \sum_{c=0}^{C_{max}} P(c) = 1$ . We determine the distance between the theoretical distribution and the empirical distribution  $P_{\text{emp}}(c)$  using the Kolmogorov-Smirnov distance defined as

$$d = \max_c |P(\geq c) - P_{\text{emp}}(\geq c)|. \quad (\text{S1})$$

The best estimates of  $z$  and  $s$  are determined by the values  $\tilde{z}$  and  $\tilde{s}$  for which the distance in Eq. S1 is minimized.

## Statistical significance

We first determine the distance  $d_{\text{emp}}$  between the empirical distribution and the theoretical distribution using Eq. S1. We then generate 1,000 artificial distributions of size  $N$  ( $N$  is the number of papers in the subject-category under consideration) and for each of them we estimate the Kolmogorov-Smirnov distance from the theoretical distribution. The  $p$ -value is calculated as the fraction of times that the distance of an artificial distribution is larger than  $d_{\text{emp}}$ .

| Subject-category                                 | $\langle c \rangle$ | $\sigma$ | $z$  | $s$  | $p$  | $\tilde{z}$ | $\tilde{s}$ | $\tilde{p}$ |
|--------------------------------------------------|---------------------|----------|------|------|------|-------------|-------------|-------------|
| ACOUSTICS                                        | 17.61               | 41.19    | 1.93 | 1.37 | 0.00 | 1.53        | 1.97        | 0.03        |
| AGRICULTURAL ECONOMICS & POLICY                  | 6.96                | 19.00    | 0.87 | 1.46 | 0.00 | 0.77        | 1.66        | 0.29        |
| AGRICULTURE, DAIRY & ANIMAL SCIENCE              | 14.68               | 28.98    | 1.89 | 1.26 | 0.00 | 1.69        | 1.66        | 0.00        |
| AGRICULTURE, MULTIDISCIPLINARY                   | 12.52               | 36.15    | 1.41 | 1.49 | 0.00 | 1.31        | 1.79        | 0.00        |
| AGRONOMY                                         | 13.33               | 21.90    | 1.94 | 1.14 | 0.00 | 1.74        | 1.54        | 0.00        |
| ALLERGY                                          | 20.99               | 29.50    | 2.50 | 1.04 | 0.04 | 2.20        | 1.64        | 0.07        |
| ANATOMY & MORPHOLOGY                             | 20.98               | 24.48    | 2.61 | 0.93 | 0.64 | 2.61        | 0.93        | 0.79        |
| ANDROLOGY                                        | 12.80               | 15.29    | 2.11 | 0.94 | 0.16 | 2.01        | 1.14        | 0.93        |
| ANESTHESIOLOGY                                   | 18.52               | 32.40    | 2.22 | 1.18 | 0.00 | 1.72        | 1.98        | 0.00        |
| ASTRONOMY & ASTROPHYSICS                         | 35.73               | 76.12    | 2.72 | 1.31 | 0.00 | 2.62        | 1.61        | 0.00        |
| AUTOMATION & CONTROL SYSTEMS                     | 12.07               | 31.86    | 1.45 | 1.44 | 0.00 | 0.75        | 2.34        | 0.02        |
| BEHAVIORAL SCIENCES                              | 24.87               | 45.12    | 2.48 | 1.21 | 0.00 | 2.18        | 1.71        | 0.00        |
| BIOCHEMICAL RESEARCH METHODS                     | 47.38               | 306.22   | 1.98 | 1.94 | 0.00 | 2.58        | 1.34        | 0.11        |
| BIOCHEMISTRY & MOLECULAR BIOLOGY                 | 42.99               | 149.40   | 2.48 | 1.60 | 0.00 | 2.88        | 1.30        | 0.00        |
| BIODIVERSITY CONSERVATION                        | 11.18               | 23.04    | 1.59 | 1.29 | 0.00 | 1.09        | 1.99        | 0.07        |
| BIOLOGY                                          | 15.60               | 31.15    | 1.94 | 1.27 | 0.00 | 1.44        | 1.97        | 0.00        |
| BIOPHYSICS                                       | 28.34               | 47.62    | 2.67 | 1.16 | 0.00 | 2.77        | 1.26        | 0.00        |
| BIOTECHNOLOGY & APPLIED MICROBIOLOGY             | 21.62               | 35.55    | 2.42 | 1.14 | 0.00 | 2.32        | 1.45        | 0.00        |
| CARDIAC & CARDIOVASCULAR SYSTEMS                 | 34.24               | 107.17   | 2.34 | 1.54 | 0.00 | 2.14        | 2.14        | 0.00        |
| CELL & TISSUE ENGINEERING                        | —                   | —        | —    | —    | —    | —           | —           | —           |
| CELL BIOLOGY                                     | 42.42               | 90.49    | 2.89 | 1.31 | 0.00 | 2.89        | 1.31        | 0.01        |
| CHEMISTRY, ANALYTICAL                            | 30.14               | 215.83   | 1.43 | 1.99 | 0.00 | 2.23        | 1.49        | 0.00        |
| CHEMISTRY, APPLIED                               | 16.84               | 35.90    | 1.97 | 1.31 | 0.00 | 1.97        | 1.61        | 0.00        |
| CHEMISTRY, INORGANIC & NUCLEAR                   | 22.98               | 30.22    | 2.63 | 1.00 | 0.00 | 2.53        | 1.40        | 0.00        |
| CHEMISTRY, MEDICINAL                             | 16.44               | 31.31    | 2.03 | 1.24 | 0.00 | 2.03        | 1.24        | 0.00        |
| CHEMISTRY, MULTIDISCIPLINARY                     | 24.66               | 66.75    | 2.15 | 1.46 | 0.00 | 2.15        | 1.66        | 0.00        |
| CHEMISTRY, ORGANIC                               | 21.26               | 47.77    | 2.16 | 1.34 | 0.00 | 2.46        | 1.14        | 0.00        |
| CHEMISTRY, PHYSICAL                              | 24.57               | 53.98    | 2.32 | 1.33 | 0.00 | 2.22        | 1.73        | 0.00        |
| CLINICAL NEUROLOGY                               | 31.58               | 57.67    | 2.72 | 1.21 | 0.00 | 2.72        | 1.51        | 0.00        |
| COMPUTER SCIENCE, ARTIFICIAL INTELLIGENCE        | 57.99               | 128.83   | 3.17 | 1.33 | 0.01 | 2.77        | 1.84        | 0.82        |
| COMPUTER SCIENCE, CYBERNETICS                    | 12.05               | 35.51    | 1.35 | 1.51 | 0.30 | 0.75        | 2.11        | 0.89        |
| COMPUTER SCIENCE, HARDWARE & ARCHITECTURE        | 19.76               | 54.13    | 1.91 | 1.46 | 0.02 | 1.21        | 2.16        | 0.50        |
| COMPUTER SCIENCE, INFORMATION SYSTEMS            | 14.92               | 46.12    | 1.52 | 1.54 | 0.12 | 1.12        | 1.93        | 0.57        |
| COMPUTER SCIENCE, INTERDISCIPLINARY APPLICATIONS | 15.27               | 56.32    | 1.38 | 1.64 | 0.00 | 1.28        | 1.84        | 0.17        |
| COMPUTER SCIENCE, SOFTWARE ENGINEERING           | 17.34               | 42.41    | 1.88 | 1.39 | 0.01 | 1.28        | 2.10        | 0.25        |
| COMPUTER SCIENCE, THEORY & METHODS               | 21.82               | 50.26    | 2.16 | 1.36 | 0.00 | 1.46        | 2.16        | 0.27        |
| CONSTRUCTION & BUILDING TECHNOLOGY               | 8.37                | 10.26    | 1.67 | 0.96 | 0.03 | 1.27        | 1.66        | 0.35        |
| CRITICAL CARE MEDICINE                           | 14.85               | 20.62    | 2.16 | 1.03 | 0.00 | 1.76        | 1.74        | 0.06        |
| CRYSTALLOGRAPHY                                  | 19.52               | 33.27    | 2.29 | 1.17 | 0.00 | 2.39        | 1.17        | 0.03        |
| DENTISTRY, ORAL SURGERY & MEDICINE               | 13.72               | 24.08    | 1.92 | 1.19 | 0.00 | 1.42        | 2.09        | 0.00        |
| DERMATOLOGY                                      | 17.26               | 27.22    | 2.22 | 1.12 | 0.00 | 1.92        | 1.72        | 0.00        |
| DEVELOPMENTAL BIOLOGY                            | 38.92               | 55.53    | 3.11 | 1.05 | 0.11 | 3.01        | 1.15        | 0.59        |
| ECOLOGY                                          | 34.58               | 57.28    | 2.88 | 1.15 | 0.00 | 2.68        | 1.65        | 0.00        |
| EDUCATION, SCIENTIFIC DISCIPLINES                | 3.72                | 10.91    | 0.18 | 1.50 | 0.00 | 0.18        | 1.50        | 0.26        |
| ELECTROCHEMISTRY                                 | 28.28               | 53.94    | 2.57 | 1.24 | 0.00 | 2.57        | 1.34        | 0.04        |
| EMERGENCY MEDICINE                               | 6.38                | 11.69    | 1.12 | 1.21 | 0.00 | 0.52        | 2.11        | 0.04        |
| ENDOCRINOLOGY & METABOLISM                       | 36.50               | 49.86    | 3.07 | 1.02 | 0.00 | 3.07        | 1.22        | 0.00        |
| ENERGY & FUELS                                   | 5.32                | 15.77    | 0.53 | 1.51 | 0.00 | -0.37       | 2.41        | 0.01        |
| ENGINEERING, AEROSPACE                           | 6.32                | 17.18    | 0.78 | 1.46 | 0.00 | 0.38        | 1.96        | 0.48        |
| ENGINEERING, BIOMEDICAL                          | 18.95               | 56.15    | 1.80 | 1.51 | 0.02 | 1.60        | 1.71        | 0.06        |

Table S37: Publication year 1980.

| Subject-category                              | $\langle c \rangle$ | $\sigma$ | $z$   | $s$  | $p$  | $\tilde{z}$ | $\tilde{s}$ | $\tilde{p}$ |
|-----------------------------------------------|---------------------|----------|-------|------|------|-------------|-------------|-------------|
| ENGINEERING, CHEMICAL                         | 14.33               | 29.95    | 1.82  | 1.30 | 0.00 | 1.12        | 2.20        | 0.00        |
| ENGINEERING, CIVIL                            | 6.92                | 16.54    | 0.98  | 1.38 | 0.00 | 0.28        | 2.28        | 0.01        |
| ENGINEERING, ELECTRICAL & ELECTRONIC          | 14.87               | 53.66    | 1.38  | 1.62 | 0.00 | 1.18        | 1.93        | 0.00        |
| ENGINEERING, ENVIRONMENTAL                    | 21.55               | 39.31    | 2.34  | 1.21 | 0.01 | 1.84        | 2.01        | 0.02        |
| ENGINEERING, GEOLOGICAL                       | 17.52               | 33.62    | 2.09  | 1.24 | 0.05 | 1.89        | 1.74        | 0.19        |
| ENGINEERING, INDUSTRIAL                       | 15.20               | 47.56    | 1.53  | 1.54 | 0.37 | 1.13        | 1.94        | 0.77        |
| ENGINEERING, MANUFACTURING                    | 4.73                | 25.32    | -0.14 | 1.84 | 0.27 | -1.14       | 2.54        | 0.97        |
| ENGINEERING, MARINE                           | 0.60                | 2.44     | -1.94 | 1.69 | 0.01 | -1.74       | 1.99        | 0.95        |
| ENGINEERING, MECHANICAL                       | 8.94                | 20.20    | 1.29  | 1.35 | 0.00 | 0.89        | 1.94        | 0.02        |
| ENGINEERING, MULTIDISCIPLINARY                | 5.74                | 21.19    | 0.40  | 1.64 | 0.00 | -0.50       | 2.54        | 0.33        |
| ENGINEERING, OCEAN                            | 5.21                | 13.89    | 0.60  | 1.45 | 0.00 | -0.40       | 2.35        | 0.11        |
| ENGINEERING, PETROLEUM                        | 0.29                | 1.69     | -3.01 | 1.88 | 0.75 | -2.11       | 1.88        | 0.20        |
| ENTOMOLOGY                                    | 11.88               | 17.05    | 1.92  | 1.06 | 0.00 | 1.62        | 1.66        | 0.00        |
| ENVIRONMENTAL SCIENCES                        | 17.70               | 42.92    | 1.91  | 1.39 | 0.00 | 1.81        | 1.69        | 0.00        |
| EVOLUTIONARY BIOLOGY                          | 44.91               | 301.41   | 1.89  | 1.96 | 0.00 | 2.69        | 1.46        | 0.08        |
| FISHERIES                                     | 30.63               | 97.47    | 2.22  | 1.55 | 0.00 | 2.52        | 1.55        | 0.04        |
| FOOD SCIENCE & TECHNOLOGY                     | 16.56               | 35.16    | 1.95  | 1.31 | 0.00 | 1.85        | 1.71        | 0.00        |
| FORESTRY                                      | 11.74               | 22.21    | 1.70  | 1.23 | 0.00 | 1.00        | 2.13        | 0.05        |
| GASTROENTEROLOGY & HEPATOLOGY                 | 30.52               | 54.84    | 2.70  | 1.20 | 0.00 | 2.40        | 1.80        | 0.00        |
| GENETICS & HEREDITY                           | 34.32               | 194.85   | 1.78  | 1.87 | 0.00 | 2.58        | 1.37        | 0.00        |
| GEOCHEMISTRY & GEOPHYSICS                     | 33.18               | 57.50    | 2.81  | 1.18 | 0.00 | 2.51        | 1.68        | 0.00        |
| GEOGRAPHY, PHYSICAL                           | 22.24               | 32.19    | 2.54  | 1.06 | 0.17 | 2.34        | 1.46        | 0.24        |
| GEOLOGY                                       | 23.72               | 35.65    | 2.58  | 1.09 | 0.05 | 2.38        | 1.49        | 0.29        |
| GEOSCIENCES, MULTIDISCIPLINARY                | 23.00               | 38.15    | 2.47  | 1.15 | 0.00 | 2.27        | 1.55        | 0.00        |
| GERIATRICS & GERONTOLOGY                      | 17.66               | 28.98    | 2.22  | 1.14 | 0.01 | 1.92        | 1.64        | 0.17        |
| HEALTH CARE SCIENCES & SERVICES               | 7.47                | 18.70    | 1.02  | 1.41 | 0.00 | 0.72        | 1.71        | 0.39        |
| HEMATOLOGY                                    | 39.13               | 117.18   | 2.52  | 1.52 | 0.00 | 2.62        | 1.82        | 0.00        |
| HISTORY & PHILOSOPHY OF SCIENCE               | 7.90                | 14.15    | 1.35  | 1.20 | 0.01 | 1.05        | 1.60        | 0.30        |
| IMAGING SCIENCE & PHOTOGRAPHIC TECHNOLOGY     | 17.98               | 32.52    | 2.16  | 1.20 | 0.95 | 1.76        | 1.61        | 0.81        |
| IMMUNOLOGY                                    | 35.61               | 71.57    | 2.76  | 1.27 | 0.00 | 2.66        | 1.47        | 0.00        |
| INFECTIOUS DISEASES                           | 29.48               | 48.89    | 2.72  | 1.15 | 0.00 | 2.32        | 1.95        | 0.00        |
| INSTRUMENTS & INSTRUMENTATION                 | 4.98                | 14.66    | 0.47  | 1.51 | 0.00 | -0.33       | 2.41        | 0.02        |
| INTEGRATIVE & COMPLEMENTARY MEDICINE          | 6.21                | 9.41     | 1.23  | 1.09 | 0.33 | 1.03        | 1.49        | 0.87        |
| LIMNOLOGY                                     | 65.88               | 216.48   | 2.95  | 1.57 | 0.01 | 3.15        | 1.47        | 0.30        |
| MARINE & FRESHWATER BIOLOGY                   | 26.70               | 65.38    | 2.31  | 1.40 | 0.00 | 2.61        | 1.30        | 0.00        |
| MATERIALS SCIENCE, BIOMATERIALS               | 31.11               | 57.01    | 2.70  | 1.21 | 0.46 | 2.40        | 1.31        | 0.84        |
| MATERIALS SCIENCE, CERAMICS                   | 19.73               | 44.60    | 2.08  | 1.35 | 0.00 | 1.48        | 2.24        | 0.00        |
| MATERIALS SCIENCE, CHARACTERIZATION & TESTING | 4.66                | 12.62    | 0.48  | 1.46 | 0.00 | 0.28        | 1.75        | 0.67        |
| MATERIALS SCIENCE, COATINGS & FILMS           | 24.02               | 37.56    | 2.56  | 1.11 | 0.05 | 2.46        | 1.41        | 0.05        |
| MATERIALS SCIENCE, COMPOSITES                 | 21.32               | 24.91    | 2.63  | 0.93 | 0.29 | 2.33        | 1.23        | 0.97        |
| MATERIALS SCIENCE, MULTIDISCIPLINARY          | 13.77               | 30.63    | 1.73  | 1.33 | 0.00 | 1.43        | 1.84        | 0.00        |
| MATERIALS SCIENCE, PAPER & WOOD               | 6.26                | 14.70    | 0.90  | 1.37 | 0.01 | 0.40        | 1.97        | 0.63        |
| MATERIALS SCIENCE, TEXTILES                   | 4.83                | 7.03     | 1.01  | 1.07 | 0.00 | 0.61        | 1.67        | 0.24        |
| MATHEMATICAL & COMPUTATIONAL BIOLOGY          | 20.33               | 33.69    | 2.35  | 1.15 | 0.00 | 1.95        | 1.65        | 0.10        |
| MATHEMATICS                                   | 10.44               | 24.05    | 1.43  | 1.36 | 0.00 | 1.03        | 1.96        | 0.00        |
| MATHEMATICS, APPLIED                          | 14.07               | 38.69    | 1.57  | 1.47 | 0.00 | 1.27        | 1.87        | 0.00        |
| MATHEMATICS, INTERDISCIPLINARY APPLICATIONS   | 22.21               | 170.92   | 1.05  | 2.02 | 0.00 | 1.35        | 2.02        | 0.03        |
| MECHANICS                                     | 16.99               | 36.59    | 1.97  | 1.32 | 0.00 | 1.57        | 1.92        | 0.00        |
| MEDICAL ETHICS                                | 2.34                | 4.56     | 0.07  | 1.25 | 0.01 | -0.13       | 1.65        | 0.83        |
| MEDICAL INFORMATICS                           | 10.43               | 19.40    | 1.60  | 1.22 | 0.37 | 1.30        | 1.62        | 0.95        |

Table S38: Publication year 1980.

| Subject-category                              | $\langle c \rangle$ | $\sigma$ | $z$  | $s$  | $p$  | $\tilde{z}$ | $\tilde{s}$ | $\tilde{p}$ |
|-----------------------------------------------|---------------------|----------|------|------|------|-------------|-------------|-------------|
| MEDICAL LABORATORY TECHNOLOGY                 | 18.01               | 26.89    | 2.30 | 1.08 | 0.01 | 2.20        | 1.38        | 0.00        |
| MEDICINE, GENERAL & INTERNAL                  | 17.08               | 56.12    | 1.60 | 1.57 | 0.00 | 0.70        | 2.47        | 0.00        |
| MEDICINE, LEGAL                               | 5.72                | 8.24     | 1.18 | 1.06 | 0.00 | 0.88        | 1.56        | 0.18        |
| MEDICINE, RESEARCH & EXPERIMENTAL             | 30.73               | 63.18    | 2.60 | 1.28 | 0.00 | 1.80        | 2.19        | 0.00        |
| METALLURGY & METALLURGICAL ENGINEERING        | 5.64                | 12.70    | 0.83 | 1.34 | 0.00 | -0.07       | 2.24        | 0.00        |
| METEOROLOGY & ATMOSPHERIC SCIENCES            | 34.36               | 78.07    | 2.63 | 1.35 | 0.16 | 2.43        | 1.75        | 0.04        |
| MICROBIOLOGY                                  | 29.01               | 49.94    | 2.68 | 1.17 | 0.00 | 2.58        | 1.57        | 0.00        |
| MICROSCOPY                                    | 10.29               | 19.32    | 1.58 | 1.23 | 0.26 | 1.28        | 1.63        | 0.84        |
| MINERALOGY                                    | 32.06               | 53.24    | 2.81 | 1.15 | 0.21 | 2.71        | 1.35        | 0.08        |
| MINING & MINERAL PROCESSING                   | 9.43                | 20.93    | 1.35 | 1.33 | 0.00 | 0.65        | 2.23        | 0.00        |
| MULTIDISCIPLINARY SCIENCES                    | 55.30               | 184.64   | 2.76 | 1.58 | 0.00 | 1.86        | 2.48        | 0.00        |
| MYCOLOGY                                      | 9.99                | 15.02    | 1.71 | 1.09 | 0.49 | 1.51        | 1.39        | 0.57        |
| NANOSCIENCE & NANOTECHNOLOGY                  | -                   | -        | -    | -    | -    | -           | -           | -           |
| NEUROIMAGING                                  | 18.18               | 23.23    | 2.42 | 0.98 | 0.07 | 2.22        | 1.48        | 0.37        |
| NEUROSCIENCES                                 | 40.03               | 64.61    | 3.05 | 1.13 | 0.00 | 2.95        | 1.43        | 0.00        |
| NUCLEAR SCIENCE & TECHNOLOGY                  | 9.08                | 16.35    | 1.48 | 1.20 | 0.00 | 1.18        | 1.70        | 0.00        |
| NURSING                                       | 2.80                | 6.26     | 0.13 | 1.34 | 0.00 | -0.17       | 1.74        | 0.90        |
| NUTRITION & DIETETICS                         | 24.43               | 42.70    | 2.50 | 1.18 | 0.00 | 2.20        | 1.88        | 0.00        |
| OBSTETRICS & GYNECOLOGY                       | 23.67               | 36.95    | 2.55 | 1.11 | 0.01 | 2.35        | 1.51        | 0.00        |
| OCEANOGRAPHY                                  | 32.97               | 113.07   | 2.22 | 1.60 | 0.00 | 2.12        | 2.10        | 0.00        |
| ONCOLOGY                                      | 32.87               | 49.47    | 2.90 | 1.09 | 0.00 | 2.80        | 1.39        | 0.00        |
| OPERATIONS RESEARCH & MANAGEMENT SCIENCE      | 13.42               | 32.30    | 1.64 | 1.39 | 0.00 | 1.34        | 1.78        | 0.03        |
| OPHTHALMOLOGY                                 | 21.77               | 40.41    | 2.33 | 1.22 | 0.00 | 2.23        | 1.62        | 0.00        |
| OPTICS                                        | 23.72               | 47.61    | 2.36 | 1.27 | 0.00 | 2.26        | 1.57        | 0.00        |
| ORNITHOLOGY                                   | 21.85               | 65.79    | 1.93 | 1.52 | 0.00 | 1.93        | 1.72        | 0.16        |
| ORTHOPEDICS                                   | 23.92               | 47.01    | 2.38 | 1.26 | 0.06 | 2.08        | 1.76        | 0.01        |
| OTORHINOLARYNGOLOGY                           | 18.38               | 28.13    | 2.31 | 1.10 | 0.01 | 2.21        | 1.50        | 0.00        |
| PALEONTOLOGY                                  | 22.79               | 42.96    | 2.37 | 1.23 | 0.73 | 2.27        | 1.43        | 0.25        |
| PARASITOLOGY                                  | 16.61               | 20.20    | 2.36 | 0.95 | 0.00 | 2.26        | 1.25        | 0.01        |
| PATHOLOGY                                     | 23.80               | 37.30    | 2.55 | 1.11 | 0.00 | 2.35        | 1.61        | 0.00        |
| PEDIATRICS                                    | 21.39               | 36.61    | 2.38 | 1.17 | 0.00 | 1.98        | 1.97        | 0.00        |
| PERIPHERAL VASCULAR DISEASE                   | 45.33               | 136.36   | 2.66 | 1.52 | 0.00 | 2.76        | 1.82        | 0.00        |
| PHARMACOLOGY & PHARMACY                       | 24.75               | 37.91    | 2.60 | 1.10 | 0.00 | 2.50        | 1.40        | 0.00        |
| PHYSICS, APPLIED                              | 19.33               | 44.80    | 2.04 | 1.36 | 0.00 | 1.94        | 1.66        | 0.00        |
| PHYSICS, ATOMIC, MOLECULAR & CHEMICAL         | 33.83               | 111.08   | 2.29 | 1.57 | 0.00 | 2.69        | 1.27        | 0.00        |
| PHYSICS, CONDENSED MATTER                     | 23.72               | 55.58    | 2.23 | 1.37 | 0.00 | 2.23        | 1.57        | 0.00        |
| PHYSICS, FLUIDS & PLASMAS                     | 23.08               | 40.62    | 2.43 | 1.19 | 0.00 | 2.13        | 1.69        | 0.01        |
| PHYSICS, MATHEMATICAL                         | 23.10               | 68.80    | 2.00 | 1.51 | 0.04 | 1.60        | 1.91        | 0.05        |
| PHYSICS, MULTIDISCIPLINARY                    | 26.89               | 164.26   | 1.47 | 1.91 | 0.00 | 1.67        | 1.91        | 0.00        |
| PHYSICS, NUCLEAR                              | 21.34               | 57.32    | 2.01 | 1.45 | 0.00 | 2.21        | 1.55        | 0.00        |
| PHYSICS, PARTICLES & FIELDS                   | 36.32               | 93.72    | 2.57 | 1.43 | 0.08 | 2.27        | 1.83        | 0.11        |
| PHYSIOLOGY                                    | 43.28               | 77.33    | 3.05 | 1.20 | 0.00 | 3.15        | 1.30        | 0.00        |
| PLANT SCIENCES                                | 20.36               | 49.52    | 2.05 | 1.39 | 0.00 | 2.15        | 1.49        | 0.00        |
| POLYMER SCIENCE                               | 24.10               | 62.09    | 2.17 | 1.42 | 0.00 | 2.37        | 1.42        | 0.00        |
| PRIMARY HEALTH CARE                           | 3.46                | 7.85     | 0.33 | 1.35 | 0.00 | -0.17       | 2.05        | 0.42        |
| PSYCHIATRY                                    | 31.38               | 63.60    | 2.63 | 1.28 | 0.00 | 2.33        | 1.88        | 0.00        |
| PSYCHOLOGY                                    | 44.07               | 209.75   | 2.20 | 1.78 | 0.00 | 2.40        | 1.58        | 0.25        |
| PUBLIC, ENVIRONMENTAL & OCCUPATIONAL HEALTH   | 18.56               | 34.93    | 2.16 | 1.23 | 0.00 | 1.76        | 1.93        | 0.00        |
| RADIOLOGY, NUCLEAR MEDICINE & MEDICAL IMAGING | 21.08               | 37.86    | 2.33 | 1.20 | 0.00 | 2.03        | 1.80        | 0.00        |
| REHABILITATION                                | 11.61               | 21.06    | 1.72 | 1.21 | 0.03 | 1.22        | 1.91        | 0.35        |

Table S39: Publication year 1980.

| Subject-category                    | $\langle c \rangle$ | $\sigma$     | $z$         | $s$         | $p$         | $\tilde{z}$ | $\tilde{s}$ | $\tilde{p}$ |
|-------------------------------------|---------------------|--------------|-------------|-------------|-------------|-------------|-------------|-------------|
| REMOTE SENSING                      | 17.46               | 32.35        | 2.11        | 1.22        | 0.50        | 1.81        | 1.62        | 0.60        |
| REPRODUCTIVE BIOLOGY                | 27.35               | 36.05        | 2.81        | 1.00        | 0.02        | 2.71        | 1.10        | 0.11        |
| RESPIRATORY SYSTEM                  | 21.30               | 35.02        | 2.40        | 1.14        | 0.00        | 2.00        | 1.74        | 0.00        |
| RHEUMATOLOGY                        | 28.77               | 97.50        | 2.10        | 1.59        | 0.00        | 2.20        | 1.99        | 0.00        |
| ROBOTICS                            | —                   | —            | —           | —           | —           | —           | —           | —           |
| SOIL SCIENCE                        | 26.60               | 146.63       | 1.56        | 1.86        | 0.00        | 2.26        | 1.56        | 0.01        |
| SPECTROSCOPY                        | 22.50               | 43.04        | 2.34        | 1.24        | 0.00        | 2.44        | 1.24        | 0.09        |
| SPORT SCIENCES                      | 26.73               | 44.70        | 2.62        | 1.15        | 0.00        | 2.32        | 1.66        | 0.02        |
| STATISTICS & PROBABILITY            | 25.78               | 160.11       | 1.41        | 1.92        | 0.00        | 1.81        | 1.82        | 0.09        |
| SUBSTANCE ABUSE                     | 24.37               | 39.52        | 2.55        | 1.14        | 0.09        | 2.35        | 1.44        | 0.94        |
| SURGERY                             | 24.04               | 45.43        | 2.42        | 1.23        | 0.00        | 2.22        | 1.73        | 0.00        |
| TELECOMMUNICATIONS                  | 15.33               | 93.89        | 0.90        | 1.91        | 0.00        | 1.00        | 2.01        | 0.09        |
| THERMODYNAMICS                      | 11.99               | 22.03        | 1.75        | 1.22        | 0.00        | 1.35        | 1.81        | 0.03        |
| TOXICOLOGY                          | 18.51               | 23.51        | 2.44        | 0.98        | 0.00        | 2.34        | 1.18        | 0.06        |
| TRANSPLANTATION                     | 15.76               | 29.17        | 2.01        | 1.22        | 0.33        | 1.71        | 1.72        | 0.13        |
| TRANSPORTATION SCIENCE & TECHNOLOGY | 9.60                | 36.54        | 0.89        | 1.66        | 0.02        | 0.39        | 2.26        | 0.62        |
| TROPICAL MEDICINE                   | 15.67               | 19.72        | 2.28        | 0.97        | 0.00        | 1.98        | 1.57        | 0.00        |
| UROLOGY & NEPHROLOGY                | 19.91               | 29.82        | 2.40        | 1.09        | 0.00        | 2.00        | 1.78        | 0.00        |
| VETERINARY SCIENCES                 | 11.72               | 17.81        | 1.86        | 1.10        | 0.00        | 1.56        | 1.79        | 0.00        |
| VIROLOGY                            | 27.90               | 38.63        | 2.79        | 1.03        | 0.00        | 2.79        | 1.14        | 0.01        |
| WATER RESOURCES                     | 19.82               | 63.13        | 1.78        | 1.55        | 0.00        | 1.78        | 1.75        | 0.05        |
| ZOOLOGY                             | 25.08               | 48.96        | 2.44        | 1.25        | 0.04        | 2.34        | 1.45        | 0.00        |
| <b>TOTAL</b>                        | <b>24.55</b>        | <b>80.00</b> | <b>1.97</b> | <b>1.57</b> | <b>0.00</b> | <b>1.97</b> | <b>1.97</b> | <b>0.00</b> |

Table S40: Publication year 1980.

| Subject-category                                 | $\langle c \rangle$ | $\sigma$ | $z$  | $s$  | $p$  | $\tilde{z}$ | $\tilde{s}$ | $\tilde{p}$ |
|--------------------------------------------------|---------------------|----------|------|------|------|-------------|-------------|-------------|
| ACOUSTICS                                        | 14.98               | 26.03    | 2.01 | 1.18 | 0.00 | 1.81        | 1.68        | 0.00        |
| AGRICULTURAL ECONOMICS & POLICY                  | 7.26                | 10.35    | 1.43 | 1.05 | 0.00 | 1.13        | 1.55        | 0.09        |
| AGRICULTURE, DAIRY & ANIMAL SCIENCE              | 14.05               | 21.51    | 2.04 | 1.10 | 0.00 | 1.84        | 1.60        | 0.00        |
| AGRICULTURE, MULTIDISCIPLINARY                   | 12.12               | 24.95    | 1.67 | 1.29 | 0.00 | 1.17        | 1.89        | 0.01        |
| AGRONOMY                                         | 13.72               | 19.97    | 2.05 | 1.07 | 0.00 | 1.85        | 1.47        | 0.00        |
| ALLERGY                                          | 20.73               | 31.50    | 2.43 | 1.10 | 0.01 | 2.13        | 1.59        | 0.06        |
| ANATOMY & MORPHOLOGY                             | 16.05               | 15.25    | 2.45 | 0.80 | 0.09 | 2.45        | 1.00        | 0.25        |
| ANDROLOGY                                        | 17.04               | 16.85    | 2.49 | 0.82 | 0.22 | 2.49        | 1.02        | 0.53        |
| ANESTHESIOLOGY                                   | 17.23               | 37.32    | 1.98 | 1.32 | 0.00 | 1.48        | 2.12        | 0.00        |
| ASTRONOMY & ASTROPHYSICS                         | 33.02               | 68.30    | 2.67 | 1.29 | 0.00 | 2.57        | 1.59        | 0.00        |
| AUTOMATION & CONTROL SYSTEMS                     | 13.83               | 34.70    | 1.63 | 1.41 | 0.00 | 1.03        | 2.11        | 0.04        |
| BEHAVIORAL SCIENCES                              | 24.66               | 38.51    | 2.59 | 1.11 | 0.00 | 2.39        | 1.61        | 0.00        |
| BIOCHEMICAL RESEARCH METHODS                     | 35.71               | 332.22   | 1.34 | 2.11 | 0.00 | 2.24        | 1.41        | 0.00        |
| BIOCHEMISTRY & MOLECULAR BIOLOGY                 | 45.57               | 189.52   | 2.37 | 1.71 | 0.00 | 2.97        | 1.40        | 0.00        |
| BIODIVERSITY CONSERVATION                        | 10.17               | 17.34    | 1.64 | 1.17 | 0.00 | 1.14        | 1.97        | 0.00        |
| BIOLOGY                                          | 16.38               | 37.78    | 1.87 | 1.36 | 0.00 | 1.57        | 1.86        | 0.00        |
| BIOPHYSICS                                       | 30.13               | 47.40    | 2.78 | 1.12 | 0.01 | 2.78        | 1.22        | 0.01        |
| BIOTECHNOLOGY & APPLIED MICROBIOLOGY             | 24.57               | 41.12    | 2.53 | 1.16 | 0.00 | 2.53        | 1.26        | 0.00        |
| CARDIAC & CARDIOVASCULAR SYSTEMS                 | 30.71               | 57.56    | 2.67 | 1.23 | 0.00 | 2.37        | 1.73        | 0.00        |
| CELL & TISSUE ENGINEERING                        | —                   | —        | —    | —    | —    | —           | —           | —           |
| CELL BIOLOGY                                     | 49.91               | 96.31    | 3.13 | 1.24 | 0.00 | 3.03        | 1.45        | 0.00        |
| CHEMISTRY, ANALYTICAL                            | 21.30               | 197.86   | 0.82 | 2.11 | 0.00 | 1.72        | 1.51        | 0.00        |
| CHEMISTRY, APPLIED                               | 16.95               | 29.01    | 2.15 | 1.17 | 0.00 | 1.95        | 1.67        | 0.00        |
| CHEMISTRY, INORGANIC & NUCLEAR                   | 21.56               | 28.81    | 2.56 | 1.01 | 0.00 | 2.36        | 1.41        | 0.00        |
| CHEMISTRY, MEDICINAL                             | 15.60               | 34.95    | 1.85 | 1.34 | 0.00 | 2.05        | 1.34        | 0.00        |
| CHEMISTRY, MULTIDISCIPLINARY                     | 22.88               | 141.96   | 1.29 | 1.92 | 0.00 | 1.89        | 1.92        | 0.00        |
| CHEMISTRY, ORGANIC                               | 22.31               | 33.14    | 2.52 | 1.08 | 0.00 | 2.52        | 1.18        | 0.00        |
| CHEMISTRY, PHYSICAL                              | 22.21               | 46.32    | 2.26 | 1.30 | 0.00 | 2.16        | 1.69        | 0.00        |
| CLINICAL NEUROLOGY                               | 28.49               | 51.44    | 2.62 | 1.20 | 0.00 | 2.52        | 1.60        | 0.00        |
| COMPUTER SCIENCE, ARTIFICIAL INTELLIGENCE        | 29.38               | 59.46    | 2.57 | 1.28 | 0.14 | 2.27        | 1.57        | 0.81        |
| COMPUTER SCIENCE, CYBERNETICS                    | 27.90               | 177.56   | 1.47 | 1.93 | 0.25 | 0.97        | 1.93        | 0.87        |
| COMPUTER SCIENCE, HARDWARE & ARCHITECTURE        | 17.68               | 51.74    | 1.74 | 1.50 | 0.00 | 1.14        | 2.20        | 0.08        |
| COMPUTER SCIENCE, INFORMATION SYSTEMS            | 17.77               | 67.67    | 1.51 | 1.66 | 0.11 | 1.11        | 2.05        | 0.43        |
| COMPUTER SCIENCE, INTERDISCIPLINARY APPLICATIONS | 11.53               | 34.55    | 1.30 | 1.52 | 0.00 | 1.20        | 1.82        | 0.05        |
| COMPUTER SCIENCE, SOFTWARE ENGINEERING           | 15.64               | 51.42    | 1.52 | 1.57 | 0.00 | 0.82        | 2.37        | 0.02        |
| COMPUTER SCIENCE, THEORY & METHODS               | 20.19               | 57.86    | 1.90 | 1.49 | 0.26 | 1.30        | 2.09        | 0.08        |
| CONSTRUCTION & BUILDING TECHNOLOGY               | 9.48                | 20.00    | 1.40 | 1.30 | 0.00 | 1.20        | 1.60        | 0.08        |
| CRITICAL CARE MEDICINE                           | 21.74               | 211.46   | 0.80 | 2.14 | 0.00 | 1.60        | 1.73        | 0.01        |
| CRYSTALLOGRAPHY                                  | 15.47               | 101.43   | 0.85 | 1.94 | 0.00 | 1.75        | 1.35        | 0.00        |
| DENTISTRY, ORAL SURGERY & MEDICINE               | 13.67               | 22.66    | 1.95 | 1.15 | 0.00 | 1.45        | 2.05        | 0.00        |
| DERMATOLOGY                                      | 15.60               | 23.78    | 2.15 | 1.10 | 0.00 | 1.85        | 1.70        | 0.00        |
| DEVELOPMENTAL BIOLOGY                            | 33.83               | 45.47    | 3.01 | 1.01 | 0.09 | 2.91        | 1.22        | 0.50        |
| ECOLOGY                                          | 37.84               | 277.60   | 1.63 | 2.00 | 0.00 | 2.53        | 1.60        | 0.00        |
| EDUCATION, SCIENTIFIC DISCIPLINES                | 5.51                | 15.97    | 0.59 | 1.50 | 0.00 | 0.49        | 1.60        | 0.08        |
| ELECTROCHEMISTRY                                 | 21.95               | 34.76    | 2.46 | 1.12 | 0.20 | 2.46        | 1.22        | 0.03        |
| EMERGENCY MEDICINE                               | 10.52               | 19.02    | 1.63 | 1.20 | 0.00 | 1.13        | 1.91        | 0.05        |
| ENDOCRINOLOGY & METABOLISM                       | 34.10               | 126.32   | 2.18 | 1.64 | 0.00 | 2.78        | 1.34        | 0.00        |
| ENERGY & FUELS                                   | 5.21                | 12.34    | 0.71 | 1.37 | 0.00 | 0.11        | 2.17        | 0.01        |
| ENGINEERING, AEROSPACE                           | 6.73                | 26.15    | 0.52 | 1.67 | 0.00 | 0.42        | 1.87        | 0.15        |
| ENGINEERING, BIOMEDICAL                          | 17.68               | 39.33    | 1.98 | 1.33 | 0.00 | 1.78        | 1.73        | 0.01        |

Table S41: Publication year 1985.

| Subject-category                              | $\langle c \rangle$ | $\sigma$ | $z$   | $s$  | $p$  | $\tilde{z}$ | $\tilde{s}$ | $\tilde{p}$ |
|-----------------------------------------------|---------------------|----------|-------|------|------|-------------|-------------|-------------|
| ENGINEERING, CHEMICAL                         | 11.35               | 23.25    | 1.61  | 1.28 | 0.00 | 0.81        | 2.18        | 0.00        |
| ENGINEERING, CIVIL                            | 7.27                | 16.58    | 1.07  | 1.35 | 0.00 | 0.57        | 2.05        | 0.00        |
| ENGINEERING, ELECTRICAL & ELECTRONIC          | 12.39               | 32.75    | 1.48  | 1.44 | 0.00 | 1.08        | 1.94        | 0.00        |
| ENGINEERING, ENVIRONMENTAL                    | 20.03               | 43.01    | 2.13  | 1.31 | 0.03 | 1.63        | 1.81        | 0.04        |
| ENGINEERING, GEOLOGICAL                       | 15.68               | 31.99    | 1.93  | 1.28 | 0.01 | 1.53        | 1.88        | 0.24        |
| ENGINEERING, INDUSTRIAL                       | 8.80                | 17.93    | 1.35  | 1.28 | 0.00 | 0.85        | 1.98        | 0.04        |
| ENGINEERING, MANUFACTURING                    | 5.72                | 11.97    | 0.90  | 1.30 | 0.00 | 0.10        | 2.20        | 0.26        |
| ENGINEERING, MARINE                           | 0.97                | 3.62     | -1.37 | 1.64 | 0.00 | -2.07       | 2.54        | 0.76        |
| ENGINEERING, MECHANICAL                       | 10.53               | 22.59    | 1.49  | 1.31 | 0.00 | 1.19        | 1.81        | 0.00        |
| ENGINEERING, MULTIDISCIPLINARY                | 7.89                | 29.94    | 0.70  | 1.65 | 0.00 | 0.10        | 2.35        | 0.09        |
| ENGINEERING, OCEAN                            | 6.97                | 17.76    | 0.94  | 1.42 | 0.00 | 0.34        | 2.22        | 0.48        |
| ENGINEERING, PETROLEUM                        | 1.39                | 7.40     | -1.36 | 1.84 | 0.01 | -1.46       | 2.04        | 0.94        |
| ENTOMOLOGY                                    | 11.54               | 15.54    | 1.93  | 1.01 | 0.00 | 1.73        | 1.52        | 0.00        |
| ENVIRONMENTAL SCIENCES                        | 18.40               | 34.67    | 2.15  | 1.23 | 0.00 | 1.85        | 1.73        | 0.00        |
| EVOLUTIONARY BIOLOGY                          | 54.22               | 508.04   | 1.75  | 2.12 | 0.00 | 2.45        | 1.82        | 0.00        |
| FISHERIES                                     | 24.94               | 29.04    | 2.79  | 0.93 | 0.00 | 2.59        | 1.33        | 0.00        |
| FOOD SCIENCE & TECHNOLOGY                     | 16.73               | 26.02    | 2.20  | 1.11 | 0.00 | 2.00        | 1.61        | 0.00        |
| FORESTRY                                      | 12.52               | 20.64    | 1.87  | 1.14 | 0.00 | 1.27        | 2.05        | 0.00        |
| GASTROENTEROLOGY & HEPATOLOGY                 | 29.22               | 45.68    | 2.76  | 1.11 | 0.00 | 2.46        | 1.71        | 0.00        |
| GENETICS & HEREDITY                           | 39.67               | 391.03   | 1.39  | 2.14 | 0.00 | 2.29        | 1.44        | 0.00        |
| GEOCHEMISTRY & GEOPHYSICS                     | 30.50               | 52.71    | 2.73  | 1.17 | 0.00 | 2.43        | 1.77        | 0.00        |
| GEOGRAPHY, PHYSICAL                           | 16.99               | 35.38    | 2.00  | 1.29 | 0.00 | 1.80        | 1.69        | 0.01        |
| GEOLOGY                                       | 24.64               | 39.38    | 2.57  | 1.13 | 0.01 | 2.27        | 1.73        | 0.01        |
| GEOSCIENCES, MULTIDISCIPLINARY                | 19.58               | 37.51    | 2.20  | 1.24 | 0.00 | 2.00        | 1.74        | 0.00        |
| GERIATRICS & GERONTOLOGY                      | 19.89               | 39.82    | 2.18  | 1.27 | 0.00 | 2.08        | 1.57        | 0.00        |
| HEALTH CARE SCIENCES & SERVICES               | 13.26               | 24.35    | 1.85  | 1.22 | 0.01 | 1.35        | 1.92        | 0.04        |
| HEMATOLOGY                                    | 37.74               | 71.33    | 2.87  | 1.23 | 0.00 | 2.57        | 1.73        | 0.00        |
| HISTORY & PHILOSOPHY OF SCIENCE               | 7.58                | 12.66    | 1.36  | 1.15 | 0.32 | 1.16        | 1.45        | 0.60        |
| IMAGING SCIENCE & PHOTOGRAPHIC TECHNOLOGY     | 20.22               | 58.79    | 1.88  | 1.50 | 0.04 | 1.68        | 1.80        | 0.29        |
| IMMUNOLOGY                                    | 33.00               | 64.32    | 2.71  | 1.25 | 0.00 | 2.61        | 1.55        | 0.00        |
| INFECTIOUS DISEASES                           | 25.49               | 44.29    | 2.54  | 1.18 | 0.00 | 2.24        | 1.78        | 0.00        |
| INSTRUMENTS & INSTRUMENTATION                 | 10.78               | 42.66    | 0.97  | 1.68 | 0.00 | 0.97        | 1.98        | 0.00        |
| INTEGRATIVE & COMPLEMENTARY MEDICINE          | 7.98                | 10.65    | 1.57  | 1.01 | 0.37 | 1.27        | 1.61        | 0.72        |
| LIMNOLOGY                                     | 41.31               | 57.39    | 3.18  | 1.04 | 0.01 | 2.98        | 1.44        | 0.24        |
| MARINE & FRESHWATER BIOLOGY                   | 25.82               | 34.22    | 2.74  | 1.00 | 0.00 | 2.64        | 1.31        | 0.00        |
| MATERIALS SCIENCE, BIOMATERIALS               | 25.70               | 42.99    | 2.58  | 1.15 | 0.15 | 2.28        | 1.36        | 0.75        |
| MATERIALS SCIENCE, CERAMICS                   | 17.26               | 39.17    | 1.94  | 1.35 | 0.00 | 1.54        | 1.85        | 0.00        |
| MATERIALS SCIENCE, CHARACTERIZATION & TESTING | 3.02                | 15.27    | -0.53 | 1.81 | 0.00 | -0.63       | 2.21        | 0.66        |
| MATERIALS SCIENCE, COATINGS & FILMS           | 20.53               | 33.34    | 2.38  | 1.14 | 0.11 | 2.28        | 1.34        | 0.01        |
| MATERIALS SCIENCE, COMPOSITES                 | 24.80               | 32.35    | 2.71  | 0.99 | 0.03 | 2.51        | 1.30        | 0.97        |
| MATERIALS SCIENCE, MULTIDISCIPLINARY          | 14.20               | 32.21    | 1.75  | 1.35 | 0.00 | 1.55        | 1.85        | 0.00        |
| MATERIALS SCIENCE, PAPER & WOOD               | 5.51                | 11.60    | 0.86  | 1.30 | 0.00 | 0.36        | 2.00        | 0.08        |
| MATERIALS SCIENCE, TEXTILES                   | 4.97                | 7.49     | 1.01  | 1.09 | 0.04 | 0.81        | 1.39        | 0.26        |
| MATHEMATICAL & COMPUTATIONAL BIOLOGY          | 17.50               | 37.43    | 2.00  | 1.31 | 0.10 | 1.70        | 1.81        | 0.05        |
| MATHEMATICS                                   | 8.88                | 23.03    | 1.16  | 1.43 | 0.00 | 0.86        | 1.83        | 0.00        |
| MATHEMATICS, APPLIED                          | 12.62               | 32.40    | 1.52  | 1.42 | 0.00 | 1.22        | 1.82        | 0.01        |
| MATHEMATICS, INTERDISCIPLINARY APPLICATIONS   | 23.44               | 74.05    | 1.96  | 1.55 | 0.50 | 1.56        | 1.95        | 0.20        |
| MECHANICS                                     | 16.92               | 34.86    | 2.00  | 1.29 | 0.00 | 1.60        | 1.79        | 0.00        |
| MEDICAL ETHICS                                | 4.35                | 9.58     | 0.59  | 1.33 | 0.00 | 0.09        | 2.23        | 0.31        |
| MEDICAL INFORMATICS                           | 13.14               | 38.10    | 1.46  | 1.50 | 0.04 | 1.36        | 1.60        | 0.39        |

Table S42: Publication year 1985.

| Subject-category                              | $\langle c \rangle$ | $\sigma$ | $z$   | $s$  | $p$  | $\tilde{z}$ | $\tilde{s}$ | $\tilde{p}$ |
|-----------------------------------------------|---------------------|----------|-------|------|------|-------------|-------------|-------------|
| MEDICAL LABORATORY TECHNOLOGY                 | 16.10               | 27.32    | 2.10  | 1.17 | 0.00 | 2.00        | 1.46        | 0.00        |
| MEDICINE, GENERAL & INTERNAL                  | 19.27               | 77.67    | 1.53  | 1.69 | 0.00 | 0.73        | 2.49        | 0.00        |
| MEDICINE, LEGAL                               | 8.72                | 13.12    | 1.58  | 1.09 | 0.00 | 1.28        | 1.59        | 0.06        |
| MEDICINE, RESEARCH & EXPERIMENTAL             | 31.20               | 71.65    | 2.52  | 1.36 | 0.00 | 1.72        | 2.26        | 0.00        |
| METALLURGY & METALLURGICAL ENGINEERING        | 6.75                | 13.40    | 1.11  | 1.26 | 0.00 | 0.31        | 2.16        | 0.00        |
| METEOROLOGY & ATMOSPHERIC SCIENCES            | 26.52               | 44.24    | 2.61  | 1.15 | 0.00 | 2.41        | 1.55        | 0.00        |
| MICROBIOLOGY                                  | 28.19               | 45.52    | 2.70  | 1.13 | 0.00 | 2.60        | 1.43        | 0.00        |
| MICROSCOPY                                    | 17.16               | 24.55    | 2.29  | 1.05 | 0.13 | 1.99        | 1.56        | 0.34        |
| MINERALOGY                                    | 27.08               | 38.82    | 2.74  | 1.06 | 0.02 | 2.64        | 1.26        | 0.23        |
| MINING & MINERAL PROCESSING                   | 7.82                | 16.15    | 1.23  | 1.29 | 0.00 | 0.73        | 2.09        | 0.00        |
| MULTIDISCIPLINARY SCIENCES                    | 76.09               | 212.95   | 3.24  | 1.48 | 0.00 | 2.24        | 2.38        | 0.00        |
| MYCOLOGY                                      | 9.02                | 12.34    | 1.67  | 1.02 | 0.03 | 1.37        | 1.53        | 0.15        |
| NANOSCIENCE & NANOTECHNOLOGY                  | 22.78               | 27.48    | 2.68  | 0.95 | 0.01 | 2.48        | 1.35        | 0.42        |
| NEUROIMAGING                                  | 19.20               | 24.65    | 2.47  | 0.98 | 0.23 | 2.37        | 1.39        | 0.15        |
| NEUROSCIENCES                                 | 39.93               | 71.95    | 2.96  | 1.20 | 0.00 | 2.96        | 1.40        | 0.00        |
| NUCLEAR SCIENCE & TECHNOLOGY                  | 8.24                | 32.71    | 0.70  | 1.68 | 0.00 | 1.00        | 1.68        | 0.00        |
| NURSING                                       | 5.83                | 16.85    | 0.64  | 1.50 | 0.00 | 0.34        | 1.99        | 0.17        |
| NUTRITION & DIETETICS                         | 20.76               | 41.22    | 2.23  | 1.26 | 0.00 | 2.13        | 1.57        | 0.00        |
| OBSTETRICS & GYNECOLOGY                       | 19.36               | 32.78    | 2.29  | 1.16 | 0.00 | 1.99        | 1.76        | 0.00        |
| OCEANOGRAPHY                                  | 31.72               | 45.41    | 2.90  | 1.06 | 0.00 | 2.60        | 1.75        | 0.00        |
| ONCOLOGY                                      | 32.25               | 51.67    | 2.84  | 1.13 | 0.00 | 2.74        | 1.43        | 0.00        |
| OPERATIONS RESEARCH & MANAGEMENT SCIENCE      | 13.95               | 32.33    | 1.71  | 1.36 | 0.00 | 1.41        | 1.86        | 0.01        |
| OPHTHALMOLOGY                                 | 20.40               | 31.54    | 2.41  | 1.10 | 0.00 | 2.11        | 1.71        | 0.00        |
| OPTICS                                        | 24.71               | 77.39    | 2.02  | 1.54 | 0.00 | 2.22        | 1.54        | 0.00        |
| ORNITHOLOGY                                   | 16.34               | 20.57    | 2.32  | 0.97 | 0.00 | 2.12        | 1.47        | 0.07        |
| ORTHOPEDICS                                   | 20.66               | 39.16    | 2.27  | 1.23 | 0.00 | 1.97        | 1.73        | 0.00        |
| OTORHINOLARYNGOLOGY                           | 15.50               | 23.73    | 2.14  | 1.10 | 0.00 | 2.04        | 1.50        | 0.00        |
| PALEONTOLOGY                                  | 18.97               | 27.32    | 2.38  | 1.06 | 0.06 | 2.28        | 1.36        | 0.56        |
| PARASITOLOGY                                  | 17.25               | 23.18    | 2.33  | 1.01 | 0.09 | 2.23        | 1.22        | 0.08        |
| PATHOLOGY                                     | 25.17               | 44.65    | 2.51  | 1.19 | 0.00 | 2.31        | 1.59        | 0.00        |
| PEDIATRICS                                    | 19.64               | 33.15    | 2.30  | 1.16 | 0.00 | 2.00        | 1.76        | 0.00        |
| PERIPHERAL VASCULAR DISEASE                   | 38.89               | 67.62    | 2.96  | 1.18 | 0.00 | 2.66        | 1.68        | 0.00        |
| PHARMACOLOGY & PHARMACY                       | 21.65               | 39.01    | 2.35  | 1.20 | 0.00 | 2.35        | 1.40        | 0.00        |
| PHYSICS, APPLIED                              | 19.26               | 39.60    | 2.13  | 1.28 | 0.00 | 2.03        | 1.59        | 0.00        |
| PHYSICS, ATOMIC, MOLECULAR & CHEMICAL         | 33.17               | 151.49   | 1.96  | 1.75 | 0.00 | 2.56        | 1.36        | 0.00        |
| PHYSICS, CONDENSED MATTER                     | 26.35               | 62.70    | 2.32  | 1.38 | 0.00 | 2.42        | 1.48        | 0.00        |
| PHYSICS, FLUIDS & PLASMAS                     | 22.49               | 39.08    | 2.42  | 1.18 | 0.07 | 2.22        | 1.68        | 0.00        |
| PHYSICS, MATHEMATICAL                         | 19.06               | 61.38    | 1.73  | 1.56 | 0.00 | 1.63        | 1.86        | 0.01        |
| PHYSICS, MULTIDISCIPLINARY                    | 27.89               | 95.20    | 2.06  | 1.59 | 0.00 | 1.86        | 1.99        | 0.00        |
| PHYSICS, NUCLEAR                              | 20.37               | 76.11    | 1.66  | 1.65 | 0.00 | 1.96        | 1.55        | 0.00        |
| PHYSICS, PARTICLES & FIELDS                   | 29.46               | 92.06    | 2.19  | 1.54 | 0.58 | 1.99        | 1.74        | 0.02        |
| PHYSIOLOGY                                    | 38.30               | 61.08    | 3.01  | 1.12 | 0.00 | 2.91        | 1.52        | 0.00        |
| PLANT SCIENCES                                | 18.96               | 29.75    | 2.32  | 1.11 | 0.00 | 2.22        | 1.41        | 0.00        |
| POLYMER SCIENCE                               | 23.65               | 49.17    | 2.33  | 1.29 | 0.00 | 2.33        | 1.39        | 0.00        |
| PRIMARY HEALTH CARE                           | 3.87                | 17.53    | -0.18 | 1.75 | 0.00 | -0.08       | 1.95        | 0.46        |
| PSYCHIATRY                                    | 29.31               | 62.10    | 2.53  | 1.30 | 0.00 | 2.33        | 1.81        | 0.00        |
| PSYCHOLOGY                                    | 35.48               | 87.98    | 2.59  | 1.40 | 0.00 | 2.59        | 1.50        | 0.01        |
| PUBLIC, ENVIRONMENTAL & OCCUPATIONAL HEALTH   | 21.04               | 54.74    | 2.02  | 1.43 | 0.00 | 1.82        | 1.83        | 0.00        |
| RADIOLOGY, NUCLEAR MEDICINE & MEDICAL IMAGING | 20.58               | 38.04    | 2.28  | 1.22 | 0.00 | 1.98        | 1.72        | 0.00        |
| REHABILITATION                                | 14.12               | 34.84    | 1.67  | 1.40 | 0.00 | 1.37        | 1.90        | 0.11        |

Table S43: Publication year 1985.



| Subject-category                    | $\langle c \rangle$ | $\sigma$     | $z$         | $s$         | $p$         | $\tilde{z}$ | $\tilde{s}$ | $\tilde{p}$ |
|-------------------------------------|---------------------|--------------|-------------|-------------|-------------|-------------|-------------|-------------|
| REMOTE SENSING                      | 21.10               | 55.19        | 2.02        | 1.44        | 0.01        | 1.82        | 1.84        | 0.08        |
| REPRODUCTIVE BIOLOGY                | 22.81               | 32.23        | 2.58        | 1.05        | 0.00        | 2.48        | 1.45        | 0.00        |
| RESPIRATORY SYSTEM                  | 19.14               | 33.60        | 2.25        | 1.19        | 0.00        | 1.85        | 1.89        | 0.00        |
| RHEUMATOLOGY                        | 22.40               | 39.06        | 2.41        | 1.18        | 0.15        | 2.21        | 1.68        | 0.00        |
| ROBOTICS                            | 39.95               | 88.91        | 2.80        | 1.33        | 0.34        | 1.80        | 2.24        | 0.97        |
| SOIL SCIENCE                        | 20.52               | 43.75        | 2.16        | 1.31        | 0.00        | 2.26        | 1.51        | 0.00        |
| SPECTROSCOPY                        | 18.56               | 92.17        | 1.30        | 1.80        | 0.00        | 2.00        | 1.40        | 0.00        |
| SPORT SCIENCES                      | 27.90               | 44.30        | 2.70        | 1.12        | 0.00        | 2.40        | 1.72        | 0.00        |
| STATISTICS & PROBABILITY            | 19.42               | 59.66        | 1.79        | 1.53        | 0.08        | 1.39        | 2.03        | 0.02        |
| SUBSTANCE ABUSE                     | 20.19               | 25.42        | 2.53        | 0.97        | 0.28        | 2.43        | 1.27        | 0.29        |
| SURGERY                             | 21.32               | 37.87        | 2.35        | 1.19        | 0.00        | 2.05        | 1.79        | 0.00        |
| TELECOMMUNICATIONS                  | 10.89               | 34.32        | 1.19        | 1.55        | 0.00        | 0.69        | 2.25        | 0.03        |
| THERMODYNAMICS                      | 13.22               | 53.33        | 1.16        | 1.69        | 0.00        | 1.36        | 1.79        | 0.00        |
| TOXICOLOGY                          | 17.52               | 27.73        | 2.24        | 1.12        | 0.00        | 2.24        | 1.32        | 0.00        |
| TRANSPLANTATION                     | 14.53               | 27.90        | 1.90        | 1.24        | 0.20        | 1.60        | 1.64        | 0.08        |
| TRANSPORTATION SCIENCE & TECHNOLOGY | 5.47                | 14.90        | 0.63        | 1.46        | 0.00        | -0.07       | 2.36        | 0.61        |
| TROPICAL MEDICINE                   | 14.70               | 23.07        | 2.07        | 1.11        | 0.01        | 1.77        | 1.62        | 0.07        |
| UROLOGY & NEPHROLOGY                | 17.73               | 36.58        | 2.05        | 1.29        | 0.00        | 1.85        | 1.79        | 0.00        |
| VETERINARY SCIENCES                 | 11.13               | 16.73        | 1.82        | 1.09        | 0.00        | 1.52        | 1.79        | 0.00        |
| VIROLOGY                            | 34.07               | 49.33        | 2.96        | 1.06        | 0.00        | 2.86        | 1.26        | 0.03        |
| WATER RESOURCES                     | 15.58               | 29.70        | 1.98        | 1.24        | 0.00        | 1.58        | 1.84        | 0.00        |
| ZOOLOGY                             | 23.93               | 46.57        | 2.39        | 1.25        | 0.00        | 2.29        | 1.55        | 0.00        |
| <b>TOTAL</b>                        | <b>24.13</b>        | <b>93.26</b> | <b>1.80</b> | <b>1.66</b> | <b>0.00</b> | <b>2.00</b> | <b>1.86</b> | <b>0.00</b> |

Table S44: Publication year 1985.

| Subject-category                                 | $\langle c \rangle$ | $\sigma$ | $z$  | $s$  | $p$  | $\tilde{z}$ | $\tilde{s}$ | $\tilde{p}$ |
|--------------------------------------------------|---------------------|----------|------|------|------|-------------|-------------|-------------|
| ACOUSTICS                                        | 17.66               | 34.33    | 2.09 | 1.25 | 0.00 | 1.89        | 1.75        | 0.00        |
| AGRICULTURAL ECONOMICS & POLICY                  | 10.16               | 17.24    | 1.64 | 1.17 | 0.00 | 1.24        | 1.57        | 0.37        |
| AGRICULTURE, DAIRY & ANIMAL SCIENCE              | 14.95               | 22.36    | 2.12 | 1.08 | 0.00 | 1.72        | 1.68        | 0.00        |
| AGRICULTURE, MULTIDISCIPLINARY                   | 11.52               | 21.57    | 1.69 | 1.23 | 0.00 | 1.19        | 1.93        | 0.00        |
| AGRONOMY                                         | 14.13               | 21.61    | 2.05 | 1.10 | 0.00 | 1.85        | 1.50        | 0.00        |
| ALLERGY                                          | 22.90               | 43.12    | 2.37 | 1.23 | 0.03 | 2.27        | 1.53        | 0.03        |
| ANATOMY & MORPHOLOGY                             | 13.07               | 15.71    | 2.12 | 0.94 | 0.08 | 2.12        | 1.04        | 0.17        |
| ANDROLOGY                                        | 17.12               | 25.29    | 2.26 | 1.08 | 0.27 | 2.26        | 1.17        | 0.73        |
| ANESTHESIOLOGY                                   | 18.01               | 36.70    | 2.07 | 1.28 | 0.00 | 1.47        | 2.18        | 0.00        |
| ASTRONOMY & ASTROPHYSICS                         | 27.75               | 50.63    | 2.59 | 1.21 | 0.00 | 2.39        | 1.71        | 0.00        |
| AUTOMATION & CONTROL SYSTEMS                     | 14.66               | 47.75    | 1.46 | 1.57 | 0.00 | 0.96        | 2.17        | 0.01        |
| BEHAVIORAL SCIENCES                              | 25.85               | 35.80    | 2.72 | 1.03 | 0.00 | 2.52        | 1.54        | 0.00        |
| BIOCHEMICAL RESEARCH METHODS                     | 23.53               | 51.13    | 2.29 | 1.32 | 0.00 | 2.29        | 1.42        | 0.00        |
| BIOCHEMISTRY & MOLECULAR BIOLOGY                 | 47.52               | 213.07   | 2.34 | 1.75 | 0.00 | 3.04        | 1.45        | 0.00        |
| BIODIVERSITY CONSERVATION                        | 13.83               | 35.51    | 1.61 | 1.42 | 0.00 | 1.31        | 2.02        | 0.00        |
| BIOLOGY                                          | 16.65               | 43.68    | 1.78 | 1.44 | 0.00 | 1.58        | 1.84        | 0.00        |
| BIOPHYSICS                                       | 32.43               | 58.88    | 2.75 | 1.21 | 0.00 | 2.85        | 1.21        | 0.00        |
| BIOTECHNOLOGY & APPLIED MICROBIOLOGY             | 26.15               | 46.10    | 2.56 | 1.19 | 0.00 | 2.66        | 1.29        | 0.00        |
| CARDIAC & CARDIOVASCULAR SYSTEMS                 | 28.44               | 61.64    | 2.48 | 1.32 | 0.00 | 2.18        | 1.82        | 0.00        |
| CELL & TISSUE ENGINEERING                        | —                   | —        | —    | —    | —    | —           | —           | —           |
| CELL BIOLOGY                                     | 58.12               | 112.61   | 3.28 | 1.25 | 0.00 | 3.08        | 1.55        | 0.00        |
| CHEMISTRY, ANALYTICAL                            | 19.68               | 42.38    | 2.12 | 1.32 | 0.00 | 2.22        | 1.41        | 0.00        |
| CHEMISTRY, APPLIED                               | 16.64               | 26.40    | 2.18 | 1.12 | 0.00 | 1.98        | 1.62        | 0.00        |
| CHEMISTRY, INORGANIC & NUCLEAR                   | 19.82               | 27.21    | 2.46 | 1.03 | 0.00 | 2.36        | 1.33        | 0.00        |
| CHEMISTRY, MEDICINAL                             | 17.47               | 27.82    | 2.23 | 1.12 | 0.00 | 2.23        | 1.32        | 0.00        |
| CHEMISTRY, MULTIDISCIPLINARY                     | 23.59               | 78.98    | 1.91 | 1.58 | 0.00 | 1.81        | 1.98        | 0.00        |
| CHEMISTRY, ORGANIC                               | 20.91               | 28.86    | 2.51 | 1.03 | 0.00 | 2.51        | 1.13        | 0.00        |
| CHEMISTRY, PHYSICAL                              | 21.32               | 51.03    | 2.11 | 1.38 | 0.00 | 2.11        | 1.68        | 0.00        |
| CLINICAL NEUROLOGY                               | 30.88               | 52.04    | 2.76 | 1.16 | 0.00 | 2.56        | 1.76        | 0.00        |
| COMPUTER SCIENCE, ARTIFICIAL INTELLIGENCE        | 40.84               | 137.62   | 2.45 | 1.58 | 0.24 | 2.25        | 1.89        | 0.13        |
| COMPUTER SCIENCE, CYBERNETICS                    | 13.50               | 28.03    | 1.77 | 1.29 | 0.14 | 1.27        | 1.99        | 0.29        |
| COMPUTER SCIENCE, HARDWARE & ARCHITECTURE        | 13.95               | 40.01    | 1.52 | 1.49 | 0.00 | 1.12        | 2.09        | 0.04        |
| COMPUTER SCIENCE, INFORMATION SYSTEMS            | 13.92               | 61.94    | 1.12 | 1.74 | 0.00 | 1.22        | 1.84        | 0.11        |
| COMPUTER SCIENCE, INTERDISCIPLINARY APPLICATIONS | 12.37               | 57.59    | 0.95 | 1.77 | 0.00 | 0.85        | 1.87        | 0.01        |
| COMPUTER SCIENCE, SOFTWARE ENGINEERING           | 12.48               | 34.84    | 1.44 | 1.47 | 0.00 | 0.84        | 2.17        | 0.04        |
| COMPUTER SCIENCE, THEORY & METHODS               | 12.77               | 33.38    | 1.52 | 1.44 | 0.00 | 1.12        | 1.93        | 0.06        |
| CONSTRUCTION & BUILDING TECHNOLOGY               | 9.23                | 13.99    | 1.63 | 1.09 | 0.00 | 1.33        | 1.59        | 0.03        |
| CRITICAL CARE MEDICINE                           | 17.11               | 31.19    | 2.11 | 1.21 | 0.00 | 1.81        | 1.81        | 0.00        |
| CRYSTALLOGRAPHY                                  | 17.16               | 263.09   | 0.11 | 2.34 | 0.00 | 1.11        | 1.64        | 0.00        |
| DENTISTRY, ORAL SURGERY & MEDICINE               | 15.25               | 25.84    | 2.05 | 1.16 | 0.00 | 1.55        | 2.06        | 0.00        |
| DERMATOLOGY                                      | 17.34               | 25.95    | 2.27 | 1.09 | 0.00 | 2.07        | 1.58        | 0.00        |
| DEVELOPMENTAL BIOLOGY                            | 60.35               | 80.14    | 3.59 | 1.01 | 0.00 | 3.39        | 1.31        | 0.27        |
| ECOLOGY                                          | 30.74               | 46.84    | 2.83 | 1.10 | 0.00 | 2.53        | 1.70        | 0.00        |
| EDUCATION, SCIENTIFIC DISCIPLINES                | 7.13                | 36.89    | 0.30 | 1.82 | 0.00 | 0.60        | 1.72        | 0.08        |
| ELECTROCHEMISTRY                                 | 22.53               | 44.87    | 2.31 | 1.26 | 0.00 | 2.41        | 1.37        | 0.00        |
| EMERGENCY MEDICINE                               | 12.01               | 24.82    | 1.66 | 1.29 | 0.00 | 1.56        | 1.79        | 0.00        |
| ENDOCRINOLOGY & METABOLISM                       | 33.46               | 48.72    | 2.94 | 1.07 | 0.00 | 2.84        | 1.37        | 0.00        |
| ENERGY & FUELS                                   | 6.96                | 15.77    | 1.03 | 1.35 | 0.00 | 0.43        | 2.25        | 0.00        |
| ENGINEERING, AEROSPACE                           | 7.98                | 18.73    | 1.14 | 1.37 | 0.00 | 0.64        | 1.97        | 0.02        |
| ENGINEERING, BIOMEDICAL                          | 19.52               | 37.06    | 2.21 | 1.24 | 0.14 | 1.91        | 1.73        | 0.00        |

Table S45: Publication year 1990.

| Subject-category                              | $\langle c \rangle$ | $\sigma$ | $z$   | $s$  | $p$  | $\tilde{z}$ | $\tilde{s}$ | $\tilde{p}$ |
|-----------------------------------------------|---------------------|----------|-------|------|------|-------------|-------------|-------------|
| ENGINEERING, CHEMICAL                         | 12.97               | 29.85    | 1.64  | 1.36 | 0.00 | 1.14        | 2.16        | 0.00        |
| ENGINEERING, CIVIL                            | 8.42                | 17.07    | 1.32  | 1.28 | 0.00 | 0.82        | 1.98        | 0.00        |
| ENGINEERING, ELECTRICAL & ELECTRONIC          | 14.90               | 56.53    | 1.33  | 1.65 | 0.00 | 1.33        | 1.95        | 0.00        |
| ENGINEERING, ENVIRONMENTAL                    | 20.44               | 36.59    | 2.30  | 1.20 | 0.00 | 1.80        | 1.90        | 0.05        |
| ENGINEERING, GEOLOGICAL                       | 17.06               | 41.81    | 1.86  | 1.40 | 0.00 | 1.66        | 1.79        | 0.16        |
| ENGINEERING, INDUSTRIAL                       | 8.31                | 18.72    | 1.22  | 1.34 | 0.00 | 0.72        | 2.04        | 0.01        |
| ENGINEERING, MANUFACTURING                    | 9.73                | 19.80    | 1.46  | 1.28 | 0.00 | 0.86        | 2.08        | 0.11        |
| ENGINEERING, MARINE                           | 0.54                | 2.55     | -2.21 | 1.78 | 0.16 | -1.61       | 1.68        | 0.78        |
| ENGINEERING, MECHANICAL                       | 10.92               | 19.50    | 1.67  | 1.20 | 0.00 | 1.37        | 1.70        | 0.00        |
| ENGINEERING, MULTIDISCIPLINARY                | 8.50                | 24.56    | 1.02  | 1.50 | 0.00 | 0.32        | 2.30        | 0.00        |
| ENGINEERING, OCEAN                            | 12.11               | 20.37    | 1.82  | 1.16 | 0.05 | 1.22        | 1.96        | 0.53        |
| ENGINEERING, PETROLEUM                        | 1.55                | 4.97     | -0.77 | 1.56 | 0.00 | -1.47       | 2.46        | 0.60        |
| ENTOMOLOGY                                    | 11.90               | 16.71    | 1.93  | 1.04 | 0.00 | 1.73        | 1.54        | 0.00        |
| ENVIRONMENTAL SCIENCES                        | 17.87               | 32.44    | 2.15  | 1.21 | 0.00 | 1.85        | 1.71        | 0.00        |
| EVOLUTIONARY BIOLOGY                          | 30.87               | 52.23    | 2.75  | 1.16 | 0.00 | 2.45        | 1.86        | 0.00        |
| FISHERIES                                     | 21.47               | 31.64    | 2.49  | 1.07 | 0.00 | 2.49        | 1.27        | 0.01        |
| FOOD SCIENCE & TECHNOLOGY                     | 17.46               | 27.02    | 2.25  | 1.10 | 0.00 | 1.95        | 1.61        | 0.00        |
| FORESTRY                                      | 16.30               | 26.02    | 2.16  | 1.13 | 0.00 | 1.76        | 1.93        | 0.00        |
| GASTROENTEROLOGY & HEPATOLOGY                 | 25.14               | 44.15    | 2.52  | 1.19 | 0.00 | 2.22        | 1.79        | 0.00        |
| GENETICS & HEREDITY                           | 37.06               | 62.76    | 2.94  | 1.16 | 0.01 | 2.84        | 1.36        | 0.00        |
| GEOCHEMISTRY & GEOPHYSICS                     | 28.51               | 47.45    | 2.69  | 1.15 | 0.00 | 2.49        | 1.45        | 0.00        |
| GEOGRAPHY, PHYSICAL                           | 18.30               | 25.62    | 2.36  | 1.04 | 0.00 | 2.06        | 1.64        | 0.01        |
| GEOLOGY                                       | 25.70               | 31.15    | 2.79  | 0.95 | 0.00 | 2.59        | 1.35        | 0.03        |
| GEOSCIENCES, MULTIDISCIPLINARY                | 19.42               | 31.70    | 2.32  | 1.14 | 0.00 | 2.12        | 1.64        | 0.00        |
| GERIATRICS & GERONTOLOGY                      | 20.44               | 37.27    | 2.29  | 1.21 | 0.07 | 1.89        | 1.91        | 0.00        |
| HEALTH CARE SCIENCES & SERVICES               | 13.14               | 29.74    | 1.67  | 1.35 | 0.00 | 1.37        | 1.85        | 0.00        |
| HEMATOLOGY                                    | 41.52               | 79.67    | 2.95  | 1.24 | 0.00 | 2.75        | 1.64        | 0.00        |
| HISTORY & PHILOSOPHY OF SCIENCE               | 6.30                | 9.88     | 1.22  | 1.11 | 0.01 | 1.02        | 1.51        | 0.14        |
| IMAGING SCIENCE & PHOTOGRAPHIC TECHNOLOGY     | 25.71               | 53.94    | 2.40  | 1.30 | 0.54 | 2.00        | 1.80        | 0.18        |
| IMMUNOLOGY                                    | 34.43               | 57.35    | 2.87  | 1.15 | 0.00 | 2.77        | 1.45        | 0.00        |
| INFECTIOUS DISEASES                           | 27.13               | 40.78    | 2.71  | 1.09 | 0.00 | 2.41        | 1.69        | 0.00        |
| INSTRUMENTS & INSTRUMENTATION                 | 10.51               | 28.81    | 1.28  | 1.46 | 0.00 | 1.18        | 1.86        | 0.00        |
| INTEGRATIVE & COMPLEMENTARY MEDICINE          | 9.42                | 12.16    | 1.75  | 0.99 | 0.02 | 1.35        | 1.69        | 0.14        |
| LIMNOLOGY                                     | 42.90               | 52.51    | 3.30  | 0.96 | 0.00 | 3.20        | 1.26        | 0.07        |
| MARINE & FRESHWATER BIOLOGY                   | 25.14               | 29.67    | 2.79  | 0.93 | 0.00 | 2.79        | 1.14        | 0.00        |
| MATERIALS SCIENCE, BIOMATERIALS               | 29.18               | 45.99    | 2.75  | 1.12 | 0.04 | 2.55        | 1.52        | 0.67        |
| MATERIALS SCIENCE, CERAMICS                   | 25.46               | 50.42    | 2.44  | 1.26 | 0.00 | 2.24        | 1.66        | 0.00        |
| MATERIALS SCIENCE, CHARACTERIZATION & TESTING | 4.44                | 8.74     | 0.70  | 1.26 | 0.00 | 0.50        | 1.56        | 0.26        |
| MATERIALS SCIENCE, COATINGS & FILMS           | 20.12               | 40.64    | 2.19  | 1.27 | 0.00 | 2.19        | 1.47        | 0.01        |
| MATERIALS SCIENCE, COMPOSITES                 | 12.12               | 20.55    | 1.82  | 1.16 | 0.00 | 1.02        | 2.06        | 0.00        |
| MATERIALS SCIENCE, MULTIDISCIPLINARY          | 13.33               | 27.95    | 1.75  | 1.30 | 0.00 | 1.45        | 1.80        | 0.00        |
| MATERIALS SCIENCE, PAPER & WOOD               | 6.01                | 13.55    | 0.89  | 1.34 | 0.00 | 0.49        | 2.04        | 0.02        |
| MATERIALS SCIENCE, TEXTILES                   | 6.51                | 9.10     | 1.33  | 1.04 | 0.00 | 1.03        | 1.64        | 0.06        |
| MATHEMATICAL & COMPUTATIONAL BIOLOGY          | 23.79               | 68.50    | 2.05  | 1.49 | 0.00 | 1.95        | 1.79        | 0.02        |
| MATHEMATICS                                   | 7.59                | 16.68    | 1.15  | 1.33 | 0.00 | 0.75        | 1.93        | 0.00        |
| MATHEMATICS, APPLIED                          | 10.86               | 27.38    | 1.39  | 1.41 | 0.00 | 1.09        | 1.81        | 0.00        |
| MATHEMATICS, INTERDISCIPLINARY APPLICATIONS   | 20.25               | 56.39    | 1.92  | 1.47 | 0.00 | 1.62        | 1.87        | 0.00        |
| MECHANICS                                     | 15.11               | 29.58    | 1.93  | 1.26 | 0.00 | 1.53        | 1.85        | 0.00        |
| MEDICAL ETHICS                                | 3.98                | 9.95     | 0.39  | 1.41 | 0.00 | 0.19        | 1.71        | 0.60        |
| MEDICAL INFORMATICS                           | 17.24               | 39.76    | 1.93  | 1.36 | 0.24 | 1.63        | 1.86        | 0.22        |

Table S46: Publication year 1990.

| Subject-category                              | $\langle c \rangle$ | $\sigma$ | $z$  | $s$  | $p$  | $\tilde{z}$ | $\tilde{s}$ | $\tilde{p}$ |
|-----------------------------------------------|---------------------|----------|------|------|------|-------------|-------------|-------------|
| MEDICAL LABORATORY TECHNOLOGY                 | 13.83               | 25.62    | 1.88 | 1.22 | 0.00 | 1.78        | 1.52        | 0.00        |
| MEDICINE, GENERAL & INTERNAL                  | 23.42               | 89.39    | 1.78 | 1.66 | 0.00 | 0.78        | 2.56        | 0.00        |
| MEDICINE, LEGAL                               | 8.75                | 17.89    | 1.35 | 1.28 | 0.00 | 1.35        | 1.58        | 0.00        |
| MEDICINE, RESEARCH & EXPERIMENTAL             | 31.36               | 74.19    | 2.50 | 1.37 | 0.00 | 1.80        | 2.27        | 0.00        |
| METALLURGY & METALLURGICAL ENGINEERING        | 7.77                | 16.14    | 1.21 | 1.29 | 0.00 | 0.61        | 2.19        | 0.00        |
| METEOROLOGY & ATMOSPHERIC SCIENCES            | 24.77               | 45.76    | 2.47 | 1.22 | 0.00 | 2.17        | 1.82        | 0.00        |
| MICROBIOLOGY                                  | 30.40               | 60.62    | 2.61 | 1.26 | 0.00 | 2.71        | 1.37        | 0.00        |
| MICROSCOPY                                    | 12.76               | 18.50    | 1.98 | 1.06 | 0.60 | 1.88        | 1.46        | 0.17        |
| MINERALOGY                                    | 25.73               | 40.03    | 2.63 | 1.11 | 0.09 | 2.63        | 1.31        | 0.02        |
| MINING & MINERAL PROCESSING                   | 7.95                | 13.19    | 1.41 | 1.15 | 0.00 | 0.81        | 2.05        | 0.00        |
| MULTIDISCIPLINARY SCIENCES                    | 67.17               | 200.71   | 3.06 | 1.52 | 0.00 | 2.06        | 2.41        | 0.00        |
| MYCOLOGY                                      | 13.20               | 26.53    | 1.77 | 1.27 | 0.00 | 1.77        | 1.37        | 0.13        |
| NANOSCIENCE & NANOTECHNOLOGY                  | 17.74               | 29.53    | 2.21 | 1.15 | 0.04 | 2.11        | 1.35        | 0.26        |
| NEUROIMAGING                                  | 25.47               | 43.49    | 2.56 | 1.17 | 0.03 | 2.56        | 1.37        | 0.20        |
| NEUROSCIENCES                                 | 39.73               | 65.09    | 3.03 | 1.14 | 0.00 | 2.93        | 1.54        | 0.00        |
| NUCLEAR SCIENCE & TECHNOLOGY                  | 8.92                | 18.14    | 1.37 | 1.28 | 0.00 | 1.17        | 1.68        | 0.00        |
| NURSING                                       | 9.46                | 16.51    | 1.55 | 1.18 | 0.00 | 0.95        | 2.08        | 0.00        |
| NUTRITION & DIETETICS                         | 20.81               | 37.31    | 2.32 | 1.20 | 0.00 | 2.12        | 1.60        | 0.00        |
| OBSTETRICS & GYNECOLOGY                       | 18.52               | 28.61    | 2.31 | 1.10 | 0.00 | 1.91        | 1.81        | 0.00        |
| OCEANOGRAPHY                                  | 29.91               | 43.66    | 2.83 | 1.07 | 0.00 | 2.73        | 1.47        | 0.00        |
| ONCOLOGY                                      | 33.14               | 65.52    | 2.71 | 1.26 | 0.00 | 2.71        | 1.46        | 0.00        |
| OPERATIONS RESEARCH & MANAGEMENT SCIENCE      | 16.99               | 36.29    | 1.97 | 1.31 | 0.01 | 1.57        | 1.81        | 0.01        |
| OPHTHALMOLOGY                                 | 18.29               | 27.67    | 2.31 | 1.09 | 0.00 | 2.01        | 1.69        | 0.00        |
| OPTICS                                        | 18.98               | 46.25    | 1.97 | 1.39 | 0.00 | 1.97        | 1.69        | 0.00        |
| ORNITHOLOGY                                   | 17.14               | 21.34    | 2.37 | 0.97 | 0.03 | 2.27        | 1.27        | 0.14        |
| ORTHOPEDICS                                   | 24.54               | 44.53    | 2.47 | 1.21 | 0.00 | 2.17        | 1.71        | 0.00        |
| OTORHINOLARYNGOLOGY                           | 16.80               | 29.82    | 2.11 | 1.19 | 0.00 | 2.11        | 1.49        | 0.00        |
| PALEONTOLOGY                                  | 17.83               | 24.98    | 2.34 | 1.04 | 0.06 | 2.24        | 1.34        | 0.13        |
| PARASITOLOGY                                  | 16.24               | 18.60    | 2.37 | 0.92 | 0.00 | 2.17        | 1.32        | 0.01        |
| PATHOLOGY                                     | 24.83               | 51.04    | 2.39 | 1.28 | 0.00 | 2.29        | 1.69        | 0.00        |
| PEDIATRICS                                    | 17.65               | 29.42    | 2.21 | 1.15 | 0.00 | 1.91        | 1.85        | 0.00        |
| PERIPHERAL VASCULAR DISEASE                   | 39.77               | 74.01    | 2.94 | 1.22 | 0.00 | 2.64        | 1.72        | 0.00        |
| PHARMACOLOGY & PHARMACY                       | 21.25               | 37.00    | 2.36 | 1.18 | 0.00 | 2.36        | 1.38        | 0.00        |
| PHYSICS, APPLIED                              | 17.50               | 67.71    | 1.48 | 1.66 | 0.00 | 1.88        | 1.57        | 0.00        |
| PHYSICS, ATOMIC, MOLECULAR & CHEMICAL         | 26.35               | 56.32    | 2.41 | 1.31 | 0.00 | 2.51        | 1.41        | 0.00        |
| PHYSICS, CONDENSED MATTER                     | 21.94               | 91.55    | 1.63 | 1.71 | 0.00 | 2.03        | 1.61        | 0.00        |
| PHYSICS, FLUIDS & PLASMAS                     | 21.79               | 35.04    | 2.44 | 1.13 | 0.00 | 2.14        | 1.63        | 0.10        |
| PHYSICS, MATHEMATICAL                         | 17.44               | 48.72    | 1.77 | 1.48 | 0.00 | 1.47        | 1.77        | 0.01        |
| PHYSICS, MULTIDISCIPLINARY                    | 27.12               | 86.34    | 2.10 | 1.55 | 0.00 | 1.70        | 2.05        | 0.00        |
| PHYSICS, NUCLEAR                              | 15.38               | 28.03    | 2.00 | 1.21 | 0.00 | 1.80        | 1.51        | 0.00        |
| PHYSICS, PARTICLES & FIELDS                   | 21.20               | 47.90    | 2.15 | 1.35 | 0.00 | 1.75        | 1.84        | 0.01        |
| PHYSIOLOGY                                    | 33.84               | 47.69    | 2.97 | 1.04 | 0.00 | 2.87        | 1.24        | 0.00        |
| PLANT SCIENCES                                | 20.37               | 34.31    | 2.34 | 1.16 | 0.00 | 2.34        | 1.36        | 0.00        |
| POLYMER SCIENCE                               | 22.22               | 36.49    | 2.45 | 1.14 | 0.00 | 2.25        | 1.64        | 0.00        |
| PRIMARY HEALTH CARE                           | 5.04                | 12.67    | 0.62 | 1.41 | 0.00 | -0.08       | 2.31        | 0.10        |
| PSYCHIATRY                                    | 31.09               | 53.09    | 2.75 | 1.17 | 0.00 | 2.35        | 1.97        | 0.00        |
| PSYCHOLOGY                                    | 41.47               | 132.91   | 2.51 | 1.56 | 0.00 | 2.81        | 1.46        | 0.00        |
| PUBLIC, ENVIRONMENTAL & OCCUPATIONAL HEALTH   | 21.55               | 38.35    | 2.36 | 1.20 | 0.00 | 2.06        | 1.79        | 0.00        |
| RADIOLOGY, NUCLEAR MEDICINE & MEDICAL IMAGING | 21.15               | 42.63    | 2.24 | 1.27 | 0.00 | 1.94        | 1.87        | 0.00        |
| REHABILITATION                                | 15.53               | 25.12    | 2.10 | 1.14 | 0.00 | 1.50        | 2.03        | 0.00        |

Table S47: Publication year 1990.

| Subject-category                    | $\langle c \rangle$ | $\sigma$     | $z$         | $s$         | $p$         | $\tilde{z}$ | $\tilde{s}$ | $\tilde{p}$ |
|-------------------------------------|---------------------|--------------|-------------|-------------|-------------|-------------|-------------|-------------|
| REMOTE SENSING                      | 23.61               | 45.68        | 2.38        | 1.25        | 0.15        | 1.98        | 1.75        | 0.09        |
| REPRODUCTIVE BIOLOGY                | 22.08               | 29.32        | 2.59        | 1.01        | 0.00        | 2.39        | 1.51        | 0.00        |
| RESPIRATORY SYSTEM                  | 18.57               | 30.16        | 2.28        | 1.14        | 0.00        | 1.88        | 1.84        | 0.00        |
| RHEUMATOLOGY                        | 28.78               | 100.43       | 2.07        | 1.61        | 0.00        | 2.17        | 1.81        | 0.00        |
| ROBOTICS                            | 17.19               | 68.34        | 1.43        | 1.68        | 0.34        | 0.83        | 2.18        | 0.83        |
| SOIL SCIENCE                        | 20.33               | 31.74        | 2.39        | 1.11        | 0.00        | 2.29        | 1.41        | 0.00        |
| SPECTROSCOPY                        | 15.34               | 33.58        | 1.85        | 1.33        | 0.00        | 1.85        | 1.53        | 0.00        |
| SPORT SCIENCES                      | 24.00               | 34.35        | 2.62        | 1.05        | 0.00        | 2.32        | 1.56        | 0.00        |
| STATISTICS & PROBABILITY            | 17.97               | 71.06        | 1.48        | 1.68        | 0.00        | 1.38        | 1.88        | 0.01        |
| SUBSTANCE ABUSE                     | 28.48               | 39.40        | 2.81        | 1.03        | 0.38        | 2.71        | 1.23        | 0.22        |
| SURGERY                             | 21.64               | 38.23        | 2.37        | 1.19        | 0.00        | 2.17        | 1.69        | 0.00        |
| TELECOMMUNICATIONS                  | 14.11               | 46.60        | 1.41        | 1.57        | 0.00        | 0.91        | 2.07        | 0.07        |
| THERMODYNAMICS                      | 11.37               | 20.34        | 1.71        | 1.20        | 0.00        | 1.41        | 1.80        | 0.00        |
| TOXICOLOGY                          | 17.76               | 26.27        | 2.30        | 1.08        | 0.00        | 2.20        | 1.38        | 0.00        |
| TRANSPLANTATION                     | 15.43               | 24.45        | 2.11        | 1.12        | 0.00        | 1.81        | 1.62        | 0.00        |
| TRANSPORTATION SCIENCE & TECHNOLOGY | 9.51                | 22.64        | 1.30        | 1.38        | 0.00        | 0.40        | 2.28        | 0.54        |
| TROPICAL MEDICINE                   | 12.84               | 17.29        | 2.04        | 1.01        | 0.00        | 1.74        | 1.62        | 0.00        |
| UROLOGY & NEPHROLOGY                | 20.06               | 40.17        | 2.19        | 1.27        | 0.00        | 1.99        | 1.77        | 0.00        |
| VETERINARY SCIENCES                 | 11.75               | 16.50        | 1.92        | 1.04        | 0.00        | 1.62        | 1.74        | 0.00        |
| VIROLOGY                            | 40.24               | 48.34        | 3.25        | 0.94        | 0.00        | 3.15        | 1.14        | 0.00        |
| WATER RESOURCES                     | 18.20               | 31.70        | 2.20        | 1.18        | 0.00        | 1.90        | 1.68        | 0.00        |
| ZOOLOGY                             | 22.57               | 41.80        | 2.37        | 1.22        | 0.00        | 2.27        | 1.42        | 0.00        |
| <b>TOTAL</b>                        | <b>24.16</b>        | <b>75.34</b> | <b>2.00</b> | <b>1.54</b> | <b>0.00</b> | <b>2.00</b> | <b>1.84</b> | <b>0.00</b> |

Table S48: Publication year 1990.

| Subject-category                                 | $\langle c \rangle$ | $\sigma$ | $z$  | $s$  | $p$  | $\tilde{z}$ | $\tilde{s}$ | $\tilde{p}$ |
|--------------------------------------------------|---------------------|----------|------|------|------|-------------|-------------|-------------|
| ACOUSTICS                                        | 13.80               | 23.13    | 1.96 | 1.16 | 0.00 | 1.76        | 1.66        | 0.00        |
| AGRICULTURAL ECONOMICS & POLICY                  | 10.42               | 15.61    | 1.76 | 1.09 | 0.01 | 1.56        | 1.48        | 0.01        |
| AGRICULTURE, DAIRY & ANIMAL SCIENCE              | 15.90               | 25.31    | 2.14 | 1.12 | 0.00 | 1.84        | 1.72        | 0.00        |
| AGRICULTURE, MULTIDISCIPLINARY                   | 14.50               | 28.34    | 1.89 | 1.25 | 0.00 | 1.59        | 1.85        | 0.00        |
| AGRONOMY                                         | 15.42               | 23.94    | 2.12 | 1.11 | 0.00 | 1.92        | 1.51        | 0.00        |
| ALLERGY                                          | 18.94               | 29.05    | 2.34 | 1.10 | 0.00 | 2.24        | 1.50        | 0.00        |
| ANATOMY & MORPHOLOGY                             | 22.84               | 106.87   | 1.56 | 1.77 | 0.00 | 2.26        | 1.27        | 0.25        |
| ANDROLOGY                                        | 13.07               | 17.24    | 2.07 | 1.00 | 0.01 | 1.87        | 1.70        | 0.03        |
| ANESTHESIOLOGY                                   | 15.86               | 30.97    | 1.98 | 1.25 | 0.00 | 1.38        | 2.15        | 0.00        |
| ASTRONOMY & ASTROPHYSICS                         | 27.15               | 58.10    | 2.44 | 1.31 | 0.00 | 2.14        | 1.91        | 0.00        |
| AUTOMATION & CONTROL SYSTEMS                     | 14.84               | 37.26    | 1.70 | 1.41 | 0.00 | 1.30        | 1.91        | 0.00        |
| BEHAVIORAL SCIENCES                              | 26.57               | 33.86    | 2.80 | 0.98 | 0.00 | 2.70        | 1.18        | 0.00        |
| BIOCHEMICAL RESEARCH METHODS                     | 20.90               | 45.45    | 2.17 | 1.32 | 0.00 | 2.37        | 1.32        | 0.00        |
| BIOCHEMISTRY & MOLECULAR BIOLOGY                 | 43.96               | 95.07    | 2.92 | 1.32 | 0.00 | 3.02        | 1.32        | 0.00        |
| BIODIVERSITY CONSERVATION                        | 20.16               | 32.60    | 2.36 | 1.13 | 0.00 | 1.86        | 2.03        | 0.00        |
| BIOLOGY                                          | 15.92               | 36.15    | 1.86 | 1.35 | 0.00 | 1.66        | 1.75        | 0.00        |
| BIOPHYSICS                                       | 30.02               | 45.49    | 2.81 | 1.09 | 0.00 | 2.81        | 1.19        | 0.00        |
| BIOTECHNOLOGY & APPLIED MICROBIOLOGY             | 21.17               | 33.14    | 2.43 | 1.11 | 0.00 | 2.33        | 1.51        | 0.00        |
| CARDIAC & CARDIOVASCULAR SYSTEMS                 | 28.18               | 54.75    | 2.56 | 1.25 | 0.00 | 2.26        | 1.85        | 0.00        |
| CELL & TISSUE ENGINEERING                        | 17.02               | 26.64    | 2.22 | 1.11 | 0.18 | 2.22        | 1.31        | 0.60        |
| CELL BIOLOGY                                     | 54.26               | 107.66   | 3.20 | 1.26 | 0.00 | 3.10        | 1.56        | 0.00        |
| CHEMISTRY, ANALYTICAL                            | 19.87               | 32.25    | 2.34 | 1.14 | 0.00 | 2.24        | 1.44        | 0.00        |
| CHEMISTRY, APPLIED                               | 14.35               | 24.89    | 1.97 | 1.18 | 0.00 | 1.67        | 1.88        | 0.00        |
| CHEMISTRY, INORGANIC & NUCLEAR                   | 18.87               | 23.94    | 2.46 | 0.98 | 0.00 | 2.46        | 1.18        | 0.00        |
| CHEMISTRY, MEDICINAL                             | 17.22               | 28.41    | 2.19 | 1.14 | 0.00 | 2.19        | 1.24        | 0.00        |
| CHEMISTRY, MULTIDISCIPLINARY                     | 20.47               | 48.71    | 2.07 | 1.38 | 0.00 | 1.67        | 1.98        | 0.00        |
| CHEMISTRY, ORGANIC                               | 19.03               | 23.76    | 2.48 | 0.97 | 0.00 | 2.48        | 1.07        | 0.00        |
| CHEMISTRY, PHYSICAL                              | 21.55               | 35.83    | 2.41 | 1.15 | 0.00 | 2.31        | 1.35        | 0.00        |
| CLINICAL NEUROLOGY                               | 24.92               | 44.16    | 2.51 | 1.19 | 0.00 | 2.01        | 2.09        | 0.00        |
| COMPUTER SCIENCE, ARTIFICIAL INTELLIGENCE        | 22.83               | 94.49    | 1.68 | 1.70 | 0.00 | 1.68        | 1.90        | 0.00        |
| COMPUTER SCIENCE, CYBERNETICS                    | 10.59               | 35.95    | 1.10 | 1.59 | 0.00 | 0.70        | 2.19        | 0.27        |
| COMPUTER SCIENCE, HARDWARE & ARCHITECTURE        | 15.40               | 51.37    | 1.49 | 1.58 | 0.00 | 1.09        | 2.08        | 0.04        |
| COMPUTER SCIENCE, INFORMATION SYSTEMS            | 12.08               | 60.80    | 0.86 | 1.81 | 0.00 | 0.96        | 1.81        | 0.02        |
| COMPUTER SCIENCE, INTERDISCIPLINARY APPLICATIONS | 12.61               | 50.89    | 1.11 | 1.69 | 0.00 | 1.21        | 1.69        | 0.00        |
| COMPUTER SCIENCE, SOFTWARE ENGINEERING           | 12.13               | 35.09    | 1.38 | 1.50 | 0.00 | 0.88        | 2.10        | 0.03        |
| COMPUTER SCIENCE, THEORY & METHODS               | 14.68               | 46.00    | 1.50 | 1.54 | 0.00 | 1.30        | 1.84        | 0.00        |
| CONSTRUCTION & BUILDING TECHNOLOGY               | 10.32               | 14.78    | 1.78 | 1.06 | 0.00 | 1.38        | 1.75        | 0.00        |
| CRITICAL CARE MEDICINE                           | 28.32               | 56.21    | 2.54 | 1.26 | 0.00 | 2.24        | 1.86        | 0.00        |
| CRYSTALLOGRAPHY                                  | 11.70               | 84.17    | 0.48 | 1.99 | 0.00 | 1.38        | 1.49        | 0.00        |
| DENTISTRY, ORAL SURGERY & MEDICINE               | 14.93               | 23.56    | 2.08 | 1.12 | 0.00 | 1.68        | 1.92        | 0.00        |
| DERMATOLOGY                                      | 15.45               | 23.76    | 2.13 | 1.10 | 0.00 | 1.83        | 1.80        | 0.00        |
| DEVELOPMENTAL BIOLOGY                            | 62.67               | 107.81   | 3.45 | 1.17 | 0.00 | 3.35        | 1.37        | 0.05        |
| ECOLOGY                                          | 29.42               | 44.39    | 2.79 | 1.09 | 0.00 | 2.69        | 1.49        | 0.00        |
| EDUCATION, SCIENTIFIC DISCIPLINES                | 5.45                | 11.93    | 0.82 | 1.33 | 0.00 | 0.52        | 1.73        | 0.20        |
| ELECTROCHEMISTRY                                 | 20.49               | 34.06    | 2.36 | 1.15 | 0.00 | 2.16        | 1.55        | 0.00        |
| EMERGENCY MEDICINE                               | 11.16               | 17.66    | 1.79 | 1.12 | 0.00 | 1.29        | 1.92        | 0.00        |
| ENDOCRINOLOGY & METABOLISM                       | 30.50               | 45.27    | 2.84 | 1.08 | 0.00 | 2.84        | 1.28        | 0.00        |
| ENERGY & FUELS                                   | 9.14                | 16.41    | 1.49 | 1.20 | 0.00 | 0.89        | 2.10        | 0.00        |
| ENGINEERING, AEROSPACE                           | 5.86                | 11.73    | 0.96 | 1.27 | 0.00 | 0.56        | 1.87        | 0.00        |
| ENGINEERING, BIOMEDICAL                          | 19.23               | 34.69    | 2.23 | 1.20 | 0.00 | 2.03        | 1.70        | 0.00        |

Table S49: Publication year 1995.

| Subject-category                              | $\langle c \rangle$ | $\sigma$ | $z$   | $s$  | $p$  | $\tilde{z}$ | $\tilde{s}$ | $\tilde{p}$ |
|-----------------------------------------------|---------------------|----------|-------|------|------|-------------|-------------|-------------|
| ENGINEERING, CHEMICAL                         | 12.71               | 23.54    | 1.80  | 1.22 | 0.00 | 1.30        | 2.02        | 0.00        |
| ENGINEERING, CIVIL                            | 8.73                | 16.31    | 1.42  | 1.22 | 0.00 | 0.92        | 1.93        | 0.00        |
| ENGINEERING, ELECTRICAL & ELECTRONIC          | 13.78               | 40.66    | 1.49  | 1.51 | 0.00 | 1.29        | 1.91        | 0.00        |
| ENGINEERING, ENVIRONMENTAL                    | 22.69               | 33.92    | 2.54  | 1.08 | 0.00 | 2.34        | 1.58        | 0.00        |
| ENGINEERING, GEOLOGICAL                       | 11.69               | 19.09    | 1.81  | 1.14 | 0.03 | 1.61        | 1.44        | 0.04        |
| ENGINEERING, INDUSTRIAL                       | 8.94                | 15.24    | 1.51  | 1.17 | 0.00 | 1.21        | 1.77        | 0.00        |
| ENGINEERING, MANUFACTURING                    | 8.20                | 11.50    | 1.56  | 1.04 | 0.00 | 1.26        | 1.64        | 0.00        |
| ENGINEERING, MARINE                           | 0.56                | 2.12     | -1.94 | 1.65 | 0.00 | -2.04       | 2.25        | 0.92        |
| ENGINEERING, MECHANICAL                       | 9.62                | 14.99    | 1.65  | 1.11 | 0.00 | 1.25        | 1.81        | 0.00        |
| ENGINEERING, MULTIDISCIPLINARY                | 8.92                | 20.59    | 1.27  | 1.36 | 0.00 | 0.77        | 2.06        | 0.00        |
| ENGINEERING, OCEAN                            | 10.29               | 22.26    | 1.46  | 1.32 | 0.00 | 0.86        | 2.12        | 0.23        |
| ENGINEERING, PETROLEUM                        | 1.43                | 4.39     | -0.81 | 1.53 | 0.00 | -1.01       | 2.03        | 0.81        |
| ENTOMOLOGY                                    | 11.68               | 15.34    | 1.96  | 1.00 | 0.00 | 1.66        | 1.70        | 0.00        |
| ENVIRONMENTAL SCIENCES                        | 21.14               | 35.05    | 2.39  | 1.15 | 0.00 | 2.29        | 1.55        | 0.00        |
| EVOLUTIONARY BIOLOGY                          | 36.39               | 70.19    | 2.82  | 1.24 | 0.00 | 2.82        | 1.45        | 0.00        |
| FISHERIES                                     | 19.02               | 21.84    | 2.52  | 0.92 | 0.00 | 2.42        | 1.22        | 0.00        |
| FOOD SCIENCE & TECHNOLOGY                     | 17.32               | 25.53    | 2.27  | 1.08 | 0.00 | 2.07        | 1.47        | 0.00        |
| FORESTRY                                      | 16.41               | 23.58    | 2.24  | 1.06 | 0.00 | 2.04        | 1.56        | 0.00        |
| GASTROENTEROLOGY & HEPATOLOGY                 | 25.86               | 42.92    | 2.59  | 1.15 | 0.00 | 2.29        | 1.65        | 0.00        |
| GENETICS & HEREDITY                           | 41.55               | 86.94    | 2.89  | 1.30 | 0.00 | 2.89        | 1.40        | 0.00        |
| GEOCHEMISTRY & GEOPHYSICS                     | 29.80               | 51.99    | 2.70  | 1.18 | 0.00 | 2.80        | 1.28        | 0.00        |
| GEOGRAPHY, PHYSICAL                           | 22.36               | 32.03    | 2.55  | 1.06 | 0.01 | 2.45        | 1.36        | 0.01        |
| GEOLOGY                                       | 22.97               | 31.38    | 2.61  | 1.02 | 0.00 | 2.31        | 1.62        | 0.00        |
| GEOSCIENCES, MULTIDISCIPLINARY                | 17.70               | 27.42    | 2.26  | 1.10 | 0.00 | 1.86        | 1.81        | 0.00        |
| GERIATRICS & GERONTOLOGY                      | 19.73               | 33.97    | 2.29  | 1.17 | 0.00 | 1.89        | 1.87        | 0.00        |
| HEALTH CARE SCIENCES & SERVICES               | 15.18               | 30.15    | 1.92  | 1.26 | 0.00 | 1.52        | 1.87        | 0.00        |
| HEMATOLOGY                                    | 39.10               | 67.28    | 2.98  | 1.17 | 0.00 | 2.78        | 1.57        | 0.00        |
| HISTORY & PHILOSOPHY OF SCIENCE               | 5.68                | 10.62    | 0.98  | 1.22 | 0.03 | 0.78        | 1.53        | 0.20        |
| IMAGING SCIENCE & PHOTOGRAPHIC TECHNOLOGY     | 20.55               | 32.75    | 2.39  | 1.12 | 0.00 | 1.99        | 1.72        | 0.11        |
| IMMUNOLOGY                                    | 33.10               | 64.60    | 2.71  | 1.25 | 0.00 | 2.71        | 1.45        | 0.00        |
| INFECTIOUS DISEASES                           | 26.36               | 36.72    | 2.73  | 1.04 | 0.00 | 2.53        | 1.54        | 0.00        |
| INSTRUMENTS & INSTRUMENTATION                 | 10.88               | 24.13    | 1.50  | 1.33 | 0.00 | 1.40        | 1.73        | 0.00        |
| INTEGRATIVE & COMPLEMENTARY MEDICINE          | 13.32               | 16.00    | 2.14  | 0.94 | 0.00 | 1.84        | 1.55        | 0.03        |
| LIMNOLOGY                                     | 32.45               | 40.41    | 3.01  | 0.97 | 0.00 | 2.91        | 1.17        | 0.28        |
| MARINE & FRESHWATER BIOLOGY                   | 21.83               | 25.21    | 2.66  | 0.92 | 0.00 | 2.66        | 1.12        | 0.00        |
| MATERIALS SCIENCE, BIOMATERIALS               | 26.37               | 38.85    | 2.70  | 1.07 | 0.21 | 2.60        | 1.17        | 0.19        |
| MATERIALS SCIENCE, CERAMICS                   | 13.89               | 25.36    | 1.90  | 1.21 | 0.00 | 1.40        | 2.11        | 0.00        |
| MATERIALS SCIENCE, CHARACTERIZATION & TESTING | 3.69                | 7.99     | 0.44  | 1.32 | 0.00 | 0.04        | 1.92        | 0.09        |
| MATERIALS SCIENCE, COATINGS & FILMS           | 19.43               | 32.83    | 2.29  | 1.16 | 0.00 | 2.29        | 1.36        | 0.00        |
| MATERIALS SCIENCE, COMPOSITES                 | 9.57                | 12.02    | 1.79  | 0.97 | 0.00 | 1.39        | 1.67        | 0.01        |
| MATERIALS SCIENCE, MULTIDISCIPLINARY          | 14.32               | 27.09    | 1.90  | 1.23 | 0.00 | 1.70        | 1.63        | 0.00        |
| MATERIALS SCIENCE, PAPER & WOOD               | 6.59                | 11.11    | 1.21  | 1.16 | 0.00 | 0.81        | 1.86        | 0.00        |
| MATERIALS SCIENCE, TEXTILES                   | 6.19                | 10.08    | 1.17  | 1.14 | 0.00 | 0.77        | 1.84        | 0.04        |
| MATHEMATICAL & COMPUTATIONAL BIOLOGY          | 21.34               | 53.32    | 2.07  | 1.41 | 0.00 | 2.07        | 1.61        | 0.01        |
| MATHEMATICS                                   | 7.20                | 15.71    | 1.10  | 1.32 | 0.00 | 0.90        | 1.72        | 0.00        |
| MATHEMATICS, APPLIED                          | 10.04               | 24.35    | 1.34  | 1.39 | 0.00 | 1.14        | 1.79        | 0.00        |
| MATHEMATICS, INTERDISCIPLINARY APPLICATIONS   | 14.94               | 38.39    | 1.69  | 1.42 | 0.00 | 1.59        | 1.72        | 0.00        |
| MECHANICS                                     | 13.63               | 28.62    | 1.77  | 1.30 | 0.00 | 1.67        | 1.60        | 0.00        |
| MEDICAL ETHICS                                | 7.52                | 11.29    | 1.43  | 1.09 | 0.00 | 0.93        | 1.89        | 0.16        |
| MEDICAL INFORMATICS                           | 16.28               | 42.37    | 1.76  | 1.43 | 0.00 | 1.56        | 1.83        | 0.02        |

Table S50: Publication year 1995.

| Subject-category                              | $\langle c \rangle$ | $\sigma$ | $z$  | $s$  | $p$  | $\tilde{z}$ | $\tilde{s}$ | $\tilde{p}$ |
|-----------------------------------------------|---------------------|----------|------|------|------|-------------|-------------|-------------|
| MEDICAL LABORATORY TECHNOLOGY                 | 16.72               | 35.40    | 1.97 | 1.30 | 0.00 | 1.87        | 1.60        | 0.00        |
| MEDICINE, GENERAL & INTERNAL                  | 25.13               | 106.06   | 1.76 | 1.71 | 0.00 | 0.76        | 2.41        | 0.02        |
| MEDICINE, LEGAL                               | 10.81               | 14.20    | 1.88 | 1.00 | 0.00 | 1.58        | 1.50        | 0.00        |
| MEDICINE, RESEARCH & EXPERIMENTAL             | 37.40               | 86.49    | 2.70 | 1.36 | 0.00 | 2.10        | 2.16        | 0.00        |
| METALLURGY & METALLURGICAL ENGINEERING        | 9.90                | 16.14    | 1.64 | 1.14 | 0.00 | 1.14        | 1.94        | 0.00        |
| METEOROLOGY & ATMOSPHERIC SCIENCES            | 21.23               | 40.11    | 2.30 | 1.23 | 0.00 | 2.00        | 1.93        | 0.00        |
| MICROBIOLOGY                                  | 29.31               | 60.90    | 2.54 | 1.29 | 0.00 | 2.74        | 1.39        | 0.00        |
| MICROSCOPY                                    | 15.26               | 20.89    | 2.20 | 1.03 | 0.23 | 2.10        | 1.33        | 0.09        |
| MINERALOGY                                    | 17.93               | 24.66    | 2.36 | 1.03 | 0.00 | 2.26        | 1.43        | 0.00        |
| MINING & MINERAL PROCESSING                   | 8.94                | 14.37    | 1.55 | 1.13 | 0.00 | 1.15        | 1.93        | 0.00        |
| MULTIDISCIPLINARY SCIENCES                    | 78.23               | 203.64   | 3.33 | 1.43 | 0.00 | 2.33        | 2.33        | 0.00        |
| MYCOLOGY                                      | 13.68               | 42.01    | 1.44 | 1.53 | 0.00 | 1.74        | 1.43        | 0.09        |
| NANOSCIENCE & NANOTECHNOLOGY                  | 18.28               | 42.25    | 1.98 | 1.36 | 0.00 | 1.98        | 1.56        | 0.00        |
| NEUROIMAGING                                  | 27.73               | 68.27    | 2.35 | 1.40 | 0.00 | 2.45        | 1.40        | 0.00        |
| NEUROSCIENCES                                 | 36.53               | 58.90    | 2.96 | 1.13 | 0.00 | 2.96        | 1.33        | 0.00        |
| NUCLEAR SCIENCE & TECHNOLOGY                  | 7.85                | 17.35    | 1.17 | 1.33 | 0.00 | 0.97        | 1.73        | 0.00        |
| NURSING                                       | 9.67                | 15.56    | 1.63 | 1.13 | 0.00 | 1.23        | 1.83        | 0.00        |
| NUTRITION & DIETETICS                         | 21.85               | 33.47    | 2.48 | 1.10 | 0.00 | 2.18        | 1.60        | 0.00        |
| OBSTETRICS & GYNECOLOGY                       | 18.46               | 29.26    | 2.29 | 1.12 | 0.00 | 1.99        | 1.72        | 0.00        |
| OCEANOGRAPHY                                  | 29.04               | 39.88    | 2.84 | 1.03 | 0.00 | 2.74        | 1.43        | 0.00        |
| ONCOLOGY                                      | 33.17               | 56.34    | 2.82 | 1.17 | 0.00 | 2.62        | 1.57        | 0.00        |
| OPERATIONS RESEARCH & MANAGEMENT SCIENCE      | 12.76               | 23.98    | 1.79 | 1.23 | 0.00 | 1.49        | 1.63        | 0.00        |
| OPHTHALMOLOGY                                 | 19.98               | 35.94    | 2.27 | 1.20 | 0.00 | 2.07        | 1.70        | 0.00        |
| OPTICS                                        | 15.82               | 35.96    | 1.85 | 1.35 | 0.00 | 1.65        | 1.75        | 0.00        |
| ORNITHOLOGY                                   | 14.61               | 17.03    | 2.25 | 0.93 | 0.02 | 2.15        | 1.22        | 0.03        |
| ORTHOPEDICS                                   | 22.14               | 36.15    | 2.45 | 1.14 | 0.00 | 1.95        | 2.04        | 0.00        |
| OTORHINOLARYNGOLOGY                           | 13.38               | 18.47    | 2.06 | 1.03 | 0.00 | 1.76        | 1.63        | 0.00        |
| PALEONTOLOGY                                  | 17.06               | 26.93    | 2.21 | 1.12 | 0.01 | 2.11        | 1.42        | 0.01        |
| PARASITOLOGY                                  | 16.62               | 19.96    | 2.36 | 0.94 | 0.00 | 2.26        | 1.24        | 0.01        |
| PATHOLOGY                                     | 22.20               | 38.05    | 2.41 | 1.17 | 0.00 | 2.21        | 1.67        | 0.00        |
| PEDIATRICS                                    | 16.31               | 29.57    | 2.06 | 1.21 | 0.00 | 1.76        | 1.81        | 0.00        |
| PERIPHERAL VASCULAR DISEASE                   | 38.57               | 67.86    | 2.95 | 1.19 | 0.00 | 2.65        | 1.79        | 0.00        |
| PHARMACOLOGY & PHARMACY                       | 19.55               | 31.51    | 2.33 | 1.13 | 0.00 | 2.23        | 1.33        | 0.00        |
| PHYSICS, APPLIED                              | 15.76               | 31.43    | 1.96 | 1.26 | 0.00 | 1.86        | 1.57        | 0.00        |
| PHYSICS, ATOMIC, MOLECULAR & CHEMICAL         | 22.88               | 59.22    | 2.11 | 1.43 | 0.00 | 2.41        | 1.33        | 0.00        |
| PHYSICS, CONDENSED MATTER                     | 17.65               | 37.70    | 2.01 | 1.31 | 0.00 | 1.91        | 1.61        | 0.00        |
| PHYSICS, FLUIDS & PLASMAS                     | 22.31               | 42.72    | 2.33 | 1.24 | 0.00 | 2.33        | 1.44        | 0.00        |
| PHYSICS, MATHEMATICAL                         | 18.56               | 52.87    | 1.82 | 1.49 | 0.00 | 1.82        | 1.69        | 0.00        |
| PHYSICS, MULTIDISCIPLINARY                    | 26.09               | 76.18    | 2.13 | 1.50 | 0.00 | 1.73        | 2.10        | 0.00        |
| PHYSICS, NUCLEAR                              | 13.57               | 42.97    | 1.41 | 1.55 | 0.00 | 1.61        | 1.55        | 0.00        |
| PHYSICS, PARTICLES & FIELDS                   | 17.69               | 46.10    | 1.85 | 1.43 | 0.00 | 1.45        | 2.03        | 0.00        |
| PHYSIOLOGY                                    | 29.20               | 35.08    | 2.93 | 0.94 | 0.00 | 2.93        | 1.14        | 0.00        |
| PLANT SCIENCES                                | 21.66               | 34.05    | 2.45 | 1.11 | 0.00 | 2.35        | 1.41        | 0.00        |
| POLYMER SCIENCE                               | 19.74               | 41.95    | 2.13 | 1.31 | 0.00 | 2.23        | 1.41        | 0.00        |
| PRIMARY HEALTH CARE                           | 6.08                | 12.57    | 0.97 | 1.29 | 0.00 | 0.27        | 2.19        | 0.03        |
| PSYCHIATRY                                    | 27.93               | 56.42    | 2.52 | 1.28 | 0.00 | 2.22        | 1.88        | 0.00        |
| PSYCHOLOGY                                    | 33.57               | 53.37    | 2.88 | 1.12 | 0.00 | 2.88        | 1.22        | 0.01        |
| PUBLIC, ENVIRONMENTAL & OCCUPATIONAL HEALTH   | 22.45               | 40.00    | 2.40 | 1.20 | 0.00 | 2.10        | 1.79        | 0.00        |
| RADIOLOGY, NUCLEAR MEDICINE & MEDICAL IMAGING | 20.36               | 43.85    | 2.15 | 1.32 | 0.00 | 1.95        | 1.81        | 0.00        |
| REHABILITATION                                | 15.55               | 22.38    | 2.18 | 1.06 | 0.00 | 1.78        | 1.86        | 0.00        |

Table S51: Publication year 1995.



| Subject-category                    | $\langle c \rangle$ | $\sigma$     | $z$         | $s$         | $p$         | $\tilde{z}$ | $\tilde{s}$ | $\tilde{p}$ |
|-------------------------------------|---------------------|--------------|-------------|-------------|-------------|-------------|-------------|-------------|
| REMOTE SENSING                      | 21.77               | 34.22        | 2.46        | 1.11        | 0.00        | 2.16        | 1.62        | 0.20        |
| REPRODUCTIVE BIOLOGY                | 23.92               | 35.20        | 2.60        | 1.07        | 0.00        | 2.50        | 1.47        | 0.00        |
| RESPIRATORY SYSTEM                  | 25.11               | 43.50        | 2.53        | 1.18        | 0.00        | 2.23        | 1.78        | 0.00        |
| RHEUMATOLOGY                        | 25.88               | 61.74        | 2.30        | 1.38        | 0.00        | 2.20        | 1.78        | 0.00        |
| ROBOTICS                            | 11.89               | 20.18        | 1.80        | 1.17        | 0.18        | 1.40        | 1.76        | 0.12        |
| SOIL SCIENCE                        | 19.39               | 29.35        | 2.37        | 1.09        | 0.00        | 2.17        | 1.59        | 0.00        |
| SPECTROSCOPY                        | 14.71               | 80.83        | 0.97        | 1.85        | 0.00        | 1.77        | 1.46        | 0.00        |
| SPORT SCIENCES                      | 21.88               | 30.45        | 2.55        | 1.04        | 0.00        | 2.35        | 1.64        | 0.00        |
| STATISTICS & PROBABILITY            | 16.57               | 51.45        | 1.63        | 1.54        | 0.00        | 1.43        | 1.84        | 0.00        |
| SUBSTANCE ABUSE                     | 25.86               | 34.17        | 2.75        | 1.00        | 0.01        | 2.65        | 1.40        | 0.00        |
| SURGERY                             | 18.01               | 32.55        | 2.17        | 1.20        | 0.00        | 1.77        | 2.00        | 0.00        |
| TELECOMMUNICATIONS                  | 12.85               | 49.53        | 1.17        | 1.66        | 0.00        | 0.67        | 2.26        | 0.00        |
| THERMODYNAMICS                      | 11.15               | 16.29        | 1.84        | 1.07        | 0.00        | 1.64        | 1.47        | 0.00        |
| TOXICOLOGY                          | 17.79               | 23.35        | 2.38        | 1.00        | 0.00        | 2.38        | 1.20        | 0.00        |
| TRANSPLANTATION                     | 15.75               | 29.49        | 2.00        | 1.23        | 0.00        | 1.80        | 1.63        | 0.00        |
| TRANSPORTATION SCIENCE & TECHNOLOGY | 12.32               | 33.26        | 1.45        | 1.45        | 0.00        | 0.95        | 2.05        | 0.21        |
| TROPICAL MEDICINE                   | 14.00               | 19.46        | 2.10        | 1.04        | 0.00        | 1.90        | 1.54        | 0.00        |
| UROLOGY & NEPHROLOGY                | 22.61               | 34.72        | 2.51        | 1.10        | 0.00        | 2.21        | 1.80        | 0.00        |
| VETERINARY SCIENCES                 | 11.86               | 18.55        | 1.85        | 1.11        | 0.00        | 1.55        | 1.71        | 0.00        |
| VIROLOGY                            | 36.13               | 46.21        | 3.10        | 0.98        | 0.00        | 3.10        | 1.09        | 0.00        |
| WATER RESOURCES                     | 17.63               | 25.33        | 2.31        | 1.06        | 0.00        | 2.11        | 1.56        | 0.00        |
| ZOOLOGY                             | 19.21               | 27.70        | 2.39        | 1.06        | 0.00        | 2.19        | 1.46        | 0.00        |
| <b>TOTAL</b>                        | <b>22.97</b>        | <b>55.82</b> | <b>2.17</b> | <b>1.39</b> | <b>0.00</b> | <b>2.07</b> | <b>1.79</b> | <b>0.00</b> |

Table S52: Publication year 1995.

| Subject-category                                 | $\langle c \rangle$ | $\sigma$ | $z$  | $s$  | $p$  | $\tilde{z}$ | $\tilde{s}$ | $\tilde{p}$ |
|--------------------------------------------------|---------------------|----------|------|------|------|-------------|-------------|-------------|
| ACOUSTICS                                        | 12.82               | 18.77    | 1.98 | 1.07 | 0.00 | 1.78        | 1.57        | 0.00        |
| AGRICULTURAL ECONOMICS & POLICY                  | 8.69                | 11.76    | 1.64 | 1.02 | 0.01 | 1.34        | 1.52        | 0.02        |
| AGRICULTURE, DAIRY & ANIMAL SCIENCE              | 12.65               | 17.75    | 1.99 | 1.04 | 0.00 | 1.59        | 1.74        | 0.00        |
| AGRICULTURE, MULTIDISCIPLINARY                   | 17.34               | 29.81    | 2.17 | 1.17 | 0.00 | 1.97        | 1.67        | 0.00        |
| AGRONOMY                                         | 15.62               | 21.02    | 2.23 | 1.01 | 0.00 | 2.13        | 1.32        | 0.00        |
| ALLERGY                                          | 20.13               | 28.87    | 2.44 | 1.06 | 0.00 | 2.24        | 1.46        | 0.00        |
| ANATOMY & MORPHOLOGY                             | 16.06               | 22.60    | 2.23 | 1.04 | 0.17 | 2.13        | 1.45        | 0.01        |
| ANDROLOGY                                        | 15.24               | 17.08    | 2.32 | 0.90 | 0.30 | 2.22        | 1.20        | 0.74        |
| ANESTHESIOLOGY                                   | 15.04               | 26.11    | 2.02 | 1.18 | 0.00 | 1.52        | 2.08        | 0.00        |
| ASTRONOMY & ASTROPHYSICS                         | 29.09               | 56.27    | 2.59 | 1.25 | 0.00 | 2.49        | 1.65        | 0.00        |
| AUTOMATION & CONTROL SYSTEMS                     | 14.80               | 33.39    | 1.79 | 1.35 | 0.00 | 1.59        | 1.84        | 0.00        |
| BEHAVIORAL SCIENCES                              | 24.91               | 27.12    | 2.82 | 0.88 | 0.00 | 2.82        | 0.98        | 0.00        |
| BIOCHEMICAL RESEARCH METHODS                     | 23.20               | 70.69    | 1.98 | 1.53 | 0.00 | 2.48        | 1.22        | 0.00        |
| BIOCHEMISTRY & MOLECULAR BIOLOGY                 | 40.22               | 71.21    | 2.98 | 1.19 | 0.00 | 2.98        | 1.19        | 0.00        |
| BIODIVERSITY CONSERVATION                        | 20.31               | 31.23    | 2.40 | 1.10 | 0.00 | 2.00        | 1.80        | 0.00        |
| BIOLOGY                                          | 17.16               | 30.55    | 2.13 | 1.20 | 0.00 | 1.83        | 1.69        | 0.00        |
| BIOPHYSICS                                       | 28.16               | 56.17    | 2.54 | 1.27 | 0.00 | 2.84        | 1.07        | 0.00        |
| BIOTECHNOLOGY & APPLIED MICROBIOLOGY             | 24.43               | 55.57    | 2.29 | 1.35 | 0.00 | 2.39        | 1.55        | 0.00        |
| CARDIAC & CARDIOVASCULAR SYSTEMS                 | 26.36               | 52.83    | 2.47 | 1.27 | 0.00 | 2.17        | 1.87        | 0.00        |
| CELL & TISSUE ENGINEERING                        | 14.40               | 19.57    | 2.14 | 1.02 | 0.25 | 1.94        | 1.62        | 0.17        |
| CELL BIOLOGY                                     | 49.82               | 86.73    | 3.21 | 1.18 | 0.00 | 3.11        | 1.38        | 0.00        |
| CHEMISTRY, ANALYTICAL                            | 19.14               | 41.02    | 2.09 | 1.31 | 0.00 | 2.29        | 1.41        | 0.00        |
| CHEMISTRY, APPLIED                               | 16.95               | 28.06    | 2.17 | 1.15 | 0.00 | 1.87        | 1.85        | 0.00        |
| CHEMISTRY, INORGANIC & NUCLEAR                   | 15.43               | 22.00    | 2.18 | 1.05 | 0.00 | 1.98        | 1.55        | 0.00        |
| CHEMISTRY, MEDICINAL                             | 18.51               | 25.30    | 2.39 | 1.02 | 0.00 | 2.39        | 1.13        | 0.00        |
| CHEMISTRY, MULTIDISCIPLINARY                     | 23.40               | 42.97    | 2.41 | 1.22 | 0.00 | 2.01        | 1.92        | 0.00        |
| CHEMISTRY, ORGANIC                               | 18.34               | 29.08    | 2.28 | 1.12 | 0.00 | 2.38        | 1.22        | 0.00        |
| CHEMISTRY, PHYSICAL                              | 22.17               | 37.34    | 2.43 | 1.16 | 0.00 | 2.43        | 1.36        | 0.00        |
| CLINICAL NEUROLOGY                               | 24.96               | 43.49    | 2.52 | 1.18 | 0.00 | 2.32        | 1.68        | 0.00        |
| COMPUTER SCIENCE, ARTIFICIAL INTELLIGENCE        | 21.75               | 56.79    | 2.05 | 1.44 | 0.00 | 1.95        | 1.83        | 0.00        |
| COMPUTER SCIENCE, CYBERNETICS                    | 11.51               | 20.51    | 1.73 | 1.20 | 0.00 | 1.13        | 2.10        | 0.01        |
| COMPUTER SCIENCE, HARDWARE & ARCHITECTURE        | 15.32               | 51.74    | 1.47 | 1.59 | 0.00 | 1.17        | 1.99        | 0.00        |
| COMPUTER SCIENCE, INFORMATION SYSTEMS            | 14.90               | 72.55    | 1.10 | 1.79 | 0.00 | 1.10        | 1.89        | 0.00        |
| COMPUTER SCIENCE, INTERDISCIPLINARY APPLICATIONS | 12.86               | 35.82    | 1.47 | 1.47 | 0.00 | 1.37        | 1.77        | 0.00        |
| COMPUTER SCIENCE, SOFTWARE ENGINEERING           | 11.57               | 36.48    | 1.25 | 1.55 | 0.00 | 0.95        | 2.05        | 0.00        |
| COMPUTER SCIENCE, THEORY & METHODS               | 15.32               | 49.65    | 1.51 | 1.56 | 0.00 | 1.41        | 1.86        | 0.00        |
| CONSTRUCTION & BUILDING TECHNOLOGY               | 10.07               | 14.91    | 1.73 | 1.08 | 0.00 | 1.43        | 1.68        | 0.00        |
| CRITICAL CARE MEDICINE                           | 28.14               | 45.77    | 2.69 | 1.14 | 0.00 | 2.39        | 1.74        | 0.00        |
| CRYSTALLOGRAPHY                                  | 12.60               | 92.45    | 0.53 | 2.00 | 0.00 | 1.43        | 1.50        | 0.00        |
| DENTISTRY, ORAL SURGERY & MEDICINE               | 14.53               | 20.49    | 2.13 | 1.04 | 0.00 | 1.83        | 1.75        | 0.00        |
| DERMATOLOGY                                      | 13.60               | 20.42    | 2.02 | 1.09 | 0.00 | 1.82        | 1.59        | 0.00        |
| DEVELOPMENTAL BIOLOGY                            | 52.41               | 70.14    | 3.45 | 1.01 | 0.00 | 3.35        | 1.21        | 0.20        |
| ECOLOGY                                          | 27.51               | 36.61    | 2.80 | 1.01 | 0.00 | 2.80        | 1.21        | 0.00        |
| EDUCATION, SCIENTIFIC DISCIPLINES                | 7.02                | 13.91    | 1.15 | 1.26 | 0.00 | 0.75        | 1.76        | 0.01        |
| ELECTROCHEMISTRY                                 | 20.65               | 30.03    | 2.46 | 1.07 | 0.00 | 2.26        | 1.57        | 0.00        |
| EMERGENCY MEDICINE                               | 10.61               | 17.17    | 1.72 | 1.14 | 0.00 | 1.32        | 1.73        | 0.00        |
| ENDOCRINOLOGY & METABOLISM                       | 31.05               | 50.24    | 2.79 | 1.14 | 0.00 | 2.79        | 1.33        | 0.00        |
| ENERGY & FUELS                                   | 11.07               | 26.12    | 1.46 | 1.37 | 0.00 | 1.16        | 2.07        | 0.00        |
| ENGINEERING, AEROSPACE                           | 5.23                | 10.40    | 0.85 | 1.26 | 0.00 | 0.35        | 1.96        | 0.00        |
| ENGINEERING, BIOMEDICAL                          | 21.73               | 41.28    | 2.31 | 1.24 | 0.00 | 2.21        | 1.64        | 0.00        |

Table S53: Publication year 1999.

| Subject-category                              | $\langle c \rangle$ | $\sigma$ | $z$   | $s$  | $p$  | $\tilde{z}$ | $\tilde{s}$ | $\tilde{p}$ |
|-----------------------------------------------|---------------------|----------|-------|------|------|-------------|-------------|-------------|
| ENGINEERING, CHEMICAL                         | 13.72               | 26.11    | 1.85  | 1.24 | 0.00 | 1.55        | 1.84        | 0.00        |
| ENGINEERING, CIVIL                            | 9.51                | 14.93    | 1.63  | 1.11 | 0.00 | 1.13        | 1.92        | 0.00        |
| ENGINEERING, ELECTRICAL & ELECTRONIC          | 14.47               | 44.62    | 1.50  | 1.53 | 0.00 | 1.40        | 1.83        | 0.00        |
| ENGINEERING, ENVIRONMENTAL                    | 21.19               | 28.76    | 2.53  | 1.02 | 0.00 | 2.33        | 1.42        | 0.00        |
| ENGINEERING, GEOLOGICAL                       | 11.54               | 15.56    | 1.93  | 1.02 | 0.04 | 1.73        | 1.42        | 0.01        |
| ENGINEERING, INDUSTRIAL                       | 9.46                | 14.46    | 1.64  | 1.10 | 0.00 | 1.24        | 1.70        | 0.00        |
| ENGINEERING, MANUFACTURING                    | 9.74                | 14.56    | 1.69  | 1.08 | 0.00 | 1.39        | 1.68        | 0.00        |
| ENGINEERING, MARINE                           | 0.56                | 2.49     | -2.08 | 1.74 | 0.00 | -2.08       | 2.24        | 0.91        |
| ENGINEERING, MECHANICAL                       | 9.59                | 17.17    | 1.54  | 1.20 | 0.00 | 1.24        | 1.80        | 0.00        |
| ENGINEERING, MULTIDISCIPLINARY                | 9.19                | 24.17    | 1.18  | 1.44 | 0.00 | 0.88        | 1.94        | 0.00        |
| ENGINEERING, OCEAN                            | 9.58                | 14.33    | 1.67  | 1.08 | 0.00 | 1.17        | 1.88        | 0.01        |
| ENGINEERING, PETROLEUM                        | 2.57                | 6.16     | -0.01 | 1.38 | 0.00 | -0.51       | 2.08        | 0.14        |
| ENTOMOLOGY                                    | 10.63               | 13.21    | 1.90  | 0.96 | 0.00 | 1.60        | 1.57        | 0.00        |
| ENVIRONMENTAL SCIENCES                        | 21.40               | 30.57    | 2.51  | 1.05 | 0.00 | 2.41        | 1.35        | 0.00        |
| EVOLUTIONARY BIOLOGY                          | 34.59               | 66.06    | 2.78  | 1.24 | 0.00 | 2.98        | 1.24        | 0.00        |
| FISHERIES                                     | 17.47               | 20.28    | 2.43  | 0.92 | 0.00 | 2.43        | 1.12        | 0.00        |
| FOOD SCIENCE & TECHNOLOGY                     | 17.70               | 24.81    | 2.33  | 1.04 | 0.00 | 2.23        | 1.34        | 0.00        |
| FORESTRY                                      | 16.84               | 21.46    | 2.34  | 0.98 | 0.00 | 2.14        | 1.48        | 0.00        |
| GASTROENTEROLOGY & HEPATOLOGY                 | 24.34               | 43.72    | 2.47  | 1.20 | 0.00 | 2.27        | 1.70        | 0.00        |
| GENETICS & HEREDITY                           | 38.87               | 73.26    | 2.90  | 1.23 | 0.00 | 2.90        | 1.33        | 0.00        |
| GEOCHEMISTRY & GEOPHYSICS                     | 26.40               | 34.69    | 2.77  | 1.00 | 0.00 | 2.77        | 1.20        | 0.00        |
| GEOGRAPHY, PHYSICAL                           | 21.07               | 26.35    | 2.58  | 0.97 | 0.00 | 2.58        | 1.17        | 0.00        |
| GEOLOGY                                       | 18.52               | 23.63    | 2.44  | 0.98 | 0.00 | 2.24        | 1.48        | 0.00        |
| GEOSCIENCES, MULTIDISCIPLINARY                | 18.51               | 26.10    | 2.37  | 1.04 | 0.00 | 2.17        | 1.45        | 0.00        |
| GERIATRICS & GERONTOLOGY                      | 20.09               | 28.69    | 2.44  | 1.05 | 0.00 | 2.24        | 1.56        | 0.00        |
| HEALTH CARE SCIENCES & SERVICES               | 14.34               | 25.33    | 1.96  | 1.19 | 0.00 | 1.66        | 1.79        | 0.00        |
| HEMATOLOGY                                    | 36.66               | 64.14    | 2.90  | 1.18 | 0.00 | 2.70        | 1.58        | 0.00        |
| HISTORY & PHILOSOPHY OF SCIENCE               | 4.62                | 8.31     | 0.81  | 1.20 | 0.00 | 0.61        | 1.60        | 0.27        |
| IMAGING SCIENCE & PHOTOGRAPHIC TECHNOLOGY     | 25.69               | 57.02    | 2.36  | 1.33 | 0.01 | 2.16        | 1.73        | 0.03        |
| IMMUNOLOGY                                    | 30.87               | 53.15    | 2.74  | 1.17 | 0.00 | 2.74        | 1.37        | 0.00        |
| INFECTIOUS DISEASES                           | 25.36               | 36.36    | 2.67  | 1.06 | 0.00 | 2.57        | 1.46        | 0.00        |
| INSTRUMENTS & INSTRUMENTATION                 | 10.52               | 17.69    | 1.68  | 1.16 | 0.00 | 1.38        | 1.76        | 0.00        |
| INTEGRATIVE & COMPLEMENTARY MEDICINE          | 13.02               | 18.01    | 2.03  | 1.03 | 0.00 | 1.63        | 1.93        | 0.00        |
| LIMNOLOGY                                     | 25.29               | 30.99    | 2.77  | 0.96 | 0.00 | 2.77        | 1.16        | 0.04        |
| MARINE & FRESHWATER BIOLOGY                   | 18.73               | 21.97    | 2.50  | 0.93 | 0.00 | 2.50        | 1.13        | 0.00        |
| MATERIALS SCIENCE, BIOMATERIALS               | 31.26               | 49.51    | 2.81  | 1.12 | 0.19 | 2.81        | 1.32        | 0.17        |
| MATERIALS SCIENCE, CERAMICS                   | 11.99               | 23.96    | 1.68  | 1.27 | 0.00 | 1.38        | 1.97        | 0.00        |
| MATERIALS SCIENCE, CHARACTERIZATION & TESTING | 3.13                | 7.40     | 0.20  | 1.37 | 0.00 | -0.30       | 2.07        | 0.16        |
| MATERIALS SCIENCE, COATINGS & FILMS           | 16.95               | 25.42    | 2.24  | 1.09 | 0.00 | 2.14        | 1.39        | 0.00        |
| MATERIALS SCIENCE, COMPOSITES                 | 10.24               | 14.75    | 1.76  | 1.06 | 0.00 | 1.56        | 1.56        | 0.00        |
| MATERIALS SCIENCE, MULTIDISCIPLINARY          | 16.13               | 33.42    | 1.95  | 1.29 | 0.00 | 1.75        | 1.69        | 0.00        |
| MATERIALS SCIENCE, PAPER & WOOD               | 6.24                | 8.84     | 1.28  | 1.05 | 0.00 | 0.88        | 1.65        | 0.00        |
| MATERIALS SCIENCE, TEXTILES                   | 5.63                | 9.88     | 1.03  | 1.19 | 0.00 | 0.63        | 1.88        | 0.01        |
| MATHEMATICAL & COMPUTATIONAL BIOLOGY          | 23.04               | 66.07    | 2.03  | 1.49 | 0.00 | 2.23        | 1.39        | 0.00        |
| MATHEMATICS                                   | 6.44                | 12.16    | 1.10  | 1.23 | 0.00 | 0.90        | 1.63        | 0.00        |
| MATHEMATICS, APPLIED                          | 9.47                | 22.26    | 1.31  | 1.37 | 0.00 | 1.21        | 1.67        | 0.00        |
| MATHEMATICS, INTERDISCIPLINARY APPLICATIONS   | 13.82               | 33.55    | 1.66  | 1.39 | 0.00 | 1.66        | 1.59        | 0.00        |
| MECHANICS                                     | 13.03               | 24.19    | 1.82  | 1.22 | 0.00 | 1.72        | 1.52        | 0.00        |
| MEDICAL ETHICS                                | 7.62                | 13.98    | 1.29  | 1.21 | 0.00 | 1.09        | 1.71        | 0.10        |
| MEDICAL INFORMATICS                           | 13.49               | 36.15    | 1.55  | 1.45 | 0.00 | 1.35        | 1.95        | 0.00        |

Table S54: Publication year 1999.

| Subject-category                              | $\langle c \rangle$ | $\sigma$ | $z$  | $s$  | $p$  | $\tilde{z}$ | $\tilde{s}$ | $\tilde{p}$ |
|-----------------------------------------------|---------------------|----------|------|------|------|-------------|-------------|-------------|
| MEDICAL LABORATORY TECHNOLOGY                 | 14.16               | 23.27    | 2.00 | 1.14 | 0.00 | 1.90        | 1.54        | 0.00        |
| MEDICINE, GENERAL & INTERNAL                  | 25.43               | 97.70    | 1.86 | 1.66 | 0.00 | 0.96        | 2.46        | 0.01        |
| MEDICINE, LEGAL                               | 8.41                | 11.29    | 1.61 | 1.01 | 0.00 | 1.31        | 1.62        | 0.00        |
| MEDICINE, RESEARCH & EXPERIMENTAL             | 32.63               | 74.67    | 2.57 | 1.35 | 0.01 | 2.17        | 1.85        | 0.00        |
| METALLURGY & METALLURGICAL ENGINEERING        | 11.48               | 23.36    | 1.62 | 1.28 | 0.00 | 1.22        | 1.98        | 0.00        |
| METEOROLOGY & ATMOSPHERIC SCIENCES            | 23.96               | 37.17    | 2.56 | 1.11 | 0.00 | 2.36        | 1.51        | 0.00        |
| MICROBIOLOGY                                  | 28.06               | 39.05    | 2.80 | 1.04 | 0.00 | 2.70        | 1.24        | 0.00        |
| MICROSCOPY                                    | 12.22               | 20.12    | 1.85 | 1.14 | 0.00 | 1.45        | 1.94        | 0.00        |
| MINERALOGY                                    | 20.57               | 46.41    | 2.12 | 1.35 | 0.00 | 2.32        | 1.35        | 0.00        |
| MINING & MINERAL PROCESSING                   | 8.51                | 14.65    | 1.45 | 1.17 | 0.00 | 1.05        | 1.87        | 0.00        |
| MULTIDISCIPLINARY SCIENCES                    | 70.71               | 174.44   | 3.28 | 1.40 | 0.00 | 2.28        | 2.30        | 0.00        |
| MYCOLOGY                                      | 14.80               | 28.84    | 1.91 | 1.25 | 0.00 | 1.91        | 1.45        | 0.01        |
| NANOSCIENCE & NANOTECHNOLOGY                  | 21.37               | 44.02    | 2.23 | 1.29 | 0.01 | 2.13        | 1.59        | 0.00        |
| NEUROIMAGING                                  | 34.15               | 71.03    | 2.69 | 1.29 | 0.00 | 2.69        | 1.39        | 0.02        |
| NEUROSCIENCES                                 | 35.12               | 51.93    | 2.98 | 1.08 | 0.00 | 2.98        | 1.28        | 0.00        |
| NUCLEAR SCIENCE & TECHNOLOGY                  | 8.08                | 13.41    | 1.43 | 1.15 | 0.00 | 1.23        | 1.55        | 0.00        |
| NURSING                                       | 8.83                | 11.39    | 1.69 | 0.99 | 0.00 | 1.29        | 1.69        | 0.00        |
| NUTRITION & DIETETICS                         | 22.37               | 32.79    | 2.53 | 1.07 | 0.00 | 2.33        | 1.57        | 0.00        |
| OBSTETRICS & GYNECOLOGY                       | 16.47               | 22.39    | 2.28 | 1.02 | 0.00 | 2.08        | 1.62        | 0.00        |
| OCEANOGRAPHY                                  | 23.41               | 25.72    | 2.76 | 0.89 | 0.00 | 2.66        | 1.19        | 0.00        |
| ONCOLOGY                                      | 32.14               | 57.94    | 2.75 | 1.20 | 0.00 | 2.75        | 1.40        | 0.00        |
| OPERATIONS RESEARCH & MANAGEMENT SCIENCE      | 14.24               | 30.81    | 1.79 | 1.32 | 0.00 | 1.79        | 1.52        | 0.00        |
| OPHTHALMOLOGY                                 | 18.02               | 28.47    | 2.27 | 1.12 | 0.00 | 1.97        | 1.72        | 0.00        |
| OPTICS                                        | 15.59               | 27.98    | 2.03 | 1.20 | 0.00 | 1.73        | 1.70        | 0.00        |
| ORNITHOLOGY                                   | 15.62               | 65.83    | 1.28 | 1.71 | 0.00 | 2.08        | 1.21        | 0.02        |
| ORTHOPEDICS                                   | 18.77               | 26.48    | 2.38 | 1.05 | 0.00 | 1.98        | 1.85        | 0.00        |
| OTORHINOLARYNGOLOGY                           | 12.96               | 16.60    | 2.08 | 0.98 | 0.00 | 1.98        | 1.28        | 0.00        |
| PALEONTOLOGY                                  | 16.27               | 20.30    | 2.32 | 0.97 | 0.00 | 2.12        | 1.37        | 0.02        |
| PARASITOLOGY                                  | 15.52               | 21.07    | 2.22 | 1.02 | 0.00 | 2.22        | 1.12        | 0.02        |
| PATHOLOGY                                     | 21.26               | 46.69    | 2.18 | 1.33 | 0.00 | 2.18        | 1.63        | 0.00        |
| PEDIATRICS                                    | 14.91               | 24.31    | 2.05 | 1.14 | 0.00 | 1.75        | 1.64        | 0.00        |
| PERIPHERAL VASCULAR DISEASE                   | 36.95               | 69.57    | 2.85 | 1.23 | 0.00 | 2.65        | 1.63        | 0.00        |
| PHARMACOLOGY & PHARMACY                       | 19.90               | 28.87    | 2.42 | 1.06 | 0.00 | 2.32        | 1.36        | 0.00        |
| PHYSICS, APPLIED                              | 16.52               | 34.47    | 1.97 | 1.30 | 0.00 | 1.87        | 1.59        | 0.00        |
| PHYSICS, ATOMIC, MOLECULAR & CHEMICAL         | 21.36               | 35.21    | 2.40 | 1.14 | 0.00 | 2.50        | 1.14        | 0.00        |
| PHYSICS, CONDENSED MATTER                     | 16.06               | 59.48    | 1.43 | 1.64 | 0.00 | 1.73        | 1.74        | 0.00        |
| PHYSICS, FLUIDS & PLASMAS                     | 18.85               | 28.15    | 2.35 | 1.08 | 0.00 | 2.25        | 1.38        | 0.00        |
| PHYSICS, MATHEMATICAL                         | 15.62               | 32.88    | 1.90 | 1.30 | 0.00 | 1.70        | 1.70        | 0.00        |
| PHYSICS, MULTIDISCIPLINARY                    | 23.03               | 73.25    | 1.93 | 1.55 | 0.00 | 1.63        | 1.95        | 0.00        |
| PHYSICS, NUCLEAR                              | 12.43               | 22.40    | 1.80 | 1.20 | 0.00 | 1.60        | 1.60        | 0.00        |
| PHYSICS, PARTICLES & FIELDS                   | 21.17               | 51.38    | 2.09 | 1.39 | 0.00 | 1.99        | 1.69        | 0.00        |
| PHYSIOLOGY                                    | 27.12               | 29.67    | 2.91 | 0.89 | 0.00 | 2.81        | 1.09        | 0.00        |
| PLANT SCIENCES                                | 19.90               | 28.28    | 2.44 | 1.05 | 0.00 | 2.34        | 1.35        | 0.00        |
| POLYMER SCIENCE                               | 18.00               | 30.75    | 2.21 | 1.17 | 0.00 | 2.11        | 1.37        | 0.00        |
| PRIMARY HEALTH CARE                           | 7.43                | 14.27    | 1.23 | 1.24 | 0.00 | 0.53        | 2.14        | 0.00        |
| PSYCHIATRY                                    | 29.65               | 48.60    | 2.74 | 1.14 | 0.00 | 2.54        | 1.64        | 0.00        |
| PSYCHOLOGY                                    | 27.39               | 35.81    | 2.81 | 1.00 | 0.00 | 2.71        | 1.20        | 0.00        |
| PUBLIC, ENVIRONMENTAL & OCCUPATIONAL HEALTH   | 19.99               | 32.65    | 2.35 | 1.14 | 0.00 | 2.05        | 1.74        | 0.00        |
| RADIOLOGY, NUCLEAR MEDICINE & MEDICAL IMAGING | 19.94               | 42.63    | 2.13 | 1.31 | 0.00 | 2.03        | 1.71        | 0.00        |
| REHABILITATION                                | 16.11               | 25.41    | 2.15 | 1.12 | 0.00 | 1.85        | 1.72        | 0.00        |

Table S55: Publication year 1999.

| Subject-category                    | $\langle c \rangle$ | $\sigma$     | $z$         | $s$         | $p$         | $\tilde{z}$ | $\tilde{s}$ | $\tilde{p}$ |
|-------------------------------------|---------------------|--------------|-------------|-------------|-------------|-------------|-------------|-------------|
| REMOTE SENSING                      | 22.32               | 32.74        | 2.53        | 1.07        | 0.01        | 2.33        | 1.47        | 0.00        |
| REPRODUCTIVE BIOLOGY                | 23.39               | 27.95        | 2.71        | 0.94        | 0.00        | 2.61        | 1.24        | 0.00        |
| RESPIRATORY SYSTEM                  | 23.44               | 38.54        | 2.50        | 1.14        | 0.00        | 2.20        | 1.84        | 0.00        |
| RHEUMATOLOGY                        | 23.40               | 42.96        | 2.42        | 1.21        | 0.00        | 2.12        | 1.81        | 0.00        |
| ROBOTICS                            | 11.78               | 19.05        | 1.82        | 1.14        | 0.01        | 1.42        | 1.83        | 0.05        |
| SOIL SCIENCE                        | 18.42               | 22.48        | 2.46        | 0.95        | 0.00        | 2.36        | 1.36        | 0.00        |
| SPECTROSCOPY                        | 13.40               | 32.58        | 1.63        | 1.39        | 0.00        | 1.73        | 1.49        | 0.00        |
| SPORT SCIENCES                      | 19.17               | 26.22        | 2.43        | 1.02        | 0.00        | 2.13        | 1.73        | 0.00        |
| STATISTICS & PROBABILITY            | 13.00               | 33.93        | 1.54        | 1.44        | 0.00        | 1.44        | 1.73        | 0.00        |
| SUBSTANCE ABUSE                     | 23.46               | 28.59        | 2.70        | 0.95        | 0.00        | 2.70        | 1.15        | 0.05        |
| SURGERY                             | 16.72               | 28.37        | 2.14        | 1.17        | 0.00        | 1.84        | 1.76        | 0.00        |
| TELECOMMUNICATIONS                  | 13.33               | 47.42        | 1.28        | 1.62        | 0.00        | 0.68        | 2.32        | 0.00        |
| THERMODYNAMICS                      | 11.49               | 18.89        | 1.79        | 1.14        | 0.00        | 1.79        | 1.35        | 0.00        |
| TOXICOLOGY                          | 19.46               | 27.75        | 2.41        | 1.05        | 0.00        | 2.41        | 1.15        | 0.00        |
| TRANSPLANTATION                     | 14.23               | 25.88        | 1.93        | 1.21        | 0.00        | 1.73        | 1.61        | 0.00        |
| TRANSPORTATION SCIENCE & TECHNOLOGY | 12.53               | 22.56        | 1.81        | 1.20        | 0.00        | 1.41        | 1.90        | 0.00        |
| TROPICAL MEDICINE                   | 14.28               | 18.27        | 2.17        | 0.98        | 0.00        | 1.97        | 1.48        | 0.00        |
| UROLOGY & NEPHROLOGY                | 21.29               | 39.33        | 2.32        | 1.22        | 0.00        | 2.12        | 1.72        | 0.00        |
| VETERINARY SCIENCES                 | 11.17               | 16.37        | 1.84        | 1.07        | 0.00        | 1.64        | 1.67        | 0.00        |
| VIROLOGY                            | 32.74               | 39.60        | 3.04        | 0.95        | 0.00        | 3.04        | 1.05        | 0.00        |
| WATER RESOURCES                     | 17.59               | 23.96        | 2.34        | 1.02        | 0.00        | 2.24        | 1.42        | 0.00        |
| ZOOLOGY                             | 17.34               | 23.51        | 2.33        | 1.02        | 0.00        | 2.23        | 1.22        | 0.00        |
| <b>TOTAL</b>                        | <b>21.97</b>        | <b>49.06</b> | <b>2.19</b> | <b>1.34</b> | <b>0.00</b> | <b>2.09</b> | <b>1.74</b> | <b>0.00</b> |

Table S56: Publication year 1999.

| Subject-category                                 | $\langle c \rangle$ | $\sigma$ | $z$   | $s$  | $p$  | $\tilde{z}$ | $\tilde{s}$ | $\tilde{p}$ |
|--------------------------------------------------|---------------------|----------|-------|------|------|-------------|-------------|-------------|
| ACOUSTICS                                        | 8.78                | 12.02    | 1.64  | 1.03 | 0.00 | 1.44        | 1.33        | 0.00        |
| AGRICULTURAL ECONOMICS & POLICY                  | 7.87                | 8.31     | 1.69  | 0.87 | 0.00 | 1.59        | 1.17        | 0.03        |
| AGRICULTURE, DAIRY & ANIMAL SCIENCE              | 8.99                | 11.61    | 1.71  | 0.99 | 0.00 | 1.41        | 1.59        | 0.00        |
| AGRICULTURE, MULTIDISCIPLINARY                   | 12.07               | 16.68    | 1.96  | 1.03 | 0.00 | 1.76        | 1.53        | 0.00        |
| AGRONOMY                                         | 10.00               | 13.82    | 1.77  | 1.03 | 0.00 | 1.67        | 1.33        | 0.00        |
| ALLERGY                                          | 18.97               | 26.59    | 2.40  | 1.04 | 0.00 | 2.30        | 1.34        | 0.00        |
| ANATOMY & MORPHOLOGY                             | 11.79               | 15.76    | 1.96  | 1.01 | 0.01 | 1.86        | 1.21        | 0.01        |
| ANDROLOGY                                        | 11.46               | 12.55    | 2.04  | 0.89 | 0.02 | 2.04        | 1.09        | 0.12        |
| ANESTHESIOLOGY                                   | 10.06               | 16.76    | 1.64  | 1.15 | 0.00 | 1.14        | 1.95        | 0.00        |
| ASTRONOMY & ASTROPHYSICS                         | 21.41               | 38.53    | 2.34  | 1.20 | 0.00 | 2.34        | 1.40        | 0.00        |
| AUTOMATION & CONTROL SYSTEMS                     | 12.91               | 29.20    | 1.65  | 1.35 | 0.00 | 1.45        | 1.75        | 0.00        |
| BEHAVIORAL SCIENCES                              | 16.95               | 17.16    | 2.48  | 0.84 | 0.00 | 2.48        | 0.94        | 0.00        |
| BIOCHEMICAL RESEARCH METHODS                     | 20.54               | 106.59   | 1.36  | 1.82 | 0.00 | 2.26        | 1.13        | 0.00        |
| BIOCHEMISTRY & MOLECULAR BIOLOGY                 | 26.18               | 52.63    | 2.46  | 1.27 | 0.00 | 2.76        | 1.07        | 0.00        |
| BIODIVERSITY CONSERVATION                        | 14.03               | 19.32    | 2.11  | 1.03 | 0.00 | 1.71        | 1.73        | 0.00        |
| BIOLOGY                                          | 16.13               | 28.66    | 2.07  | 1.20 | 0.00 | 1.77        | 1.69        | 0.00        |
| BIOPHYSICS                                       | 19.48               | 67.74    | 1.68  | 1.60 | 0.00 | 2.48        | 1.10        | 0.00        |
| BIOTECHNOLOGY & APPLIED MICROBIOLOGY             | 19.63               | 77.20    | 1.58  | 1.67 | 0.00 | 2.28        | 1.27        | 0.00        |
| CARDIAC & CARDIOVASCULAR SYSTEMS                 | 20.21               | 40.31    | 2.20  | 1.27 | 0.00 | 2.00        | 1.77        | 0.00        |
| CELL & TISSUE ENGINEERING                        | 31.40               | 42.38    | 2.93  | 1.02 | 0.02 | 2.73        | 1.32        | 0.84        |
| CELL BIOLOGY                                     | 32.72               | 49.31    | 2.90  | 1.09 | 0.00 | 2.80        | 1.19        | 0.00        |
| CHEMISTRY, ANALYTICAL                            | 15.04               | 20.35    | 2.19  | 1.02 | 0.00 | 2.09        | 1.32        | 0.00        |
| CHEMISTRY, APPLIED                               | 11.76               | 15.77    | 1.95  | 1.01 | 0.00 | 1.75        | 1.51        | 0.00        |
| CHEMISTRY, INORGANIC & NUCLEAR                   | 12.33               | 15.74    | 2.03  | 0.98 | 0.00 | 1.93        | 1.38        | 0.00        |
| CHEMISTRY, MEDICINAL                             | 14.62               | 19.02    | 2.19  | 0.99 | 0.00 | 2.29        | 0.99        | 0.00        |
| CHEMISTRY, MULTIDISCIPLINARY                     | 21.38               | 40.73    | 2.30  | 1.24 | 0.00 | 1.90        | 1.84        | 0.00        |
| CHEMISTRY, ORGANIC                               | 14.56               | 17.46    | 2.23  | 0.94 | 0.00 | 2.23        | 1.14        | 0.00        |
| CHEMISTRY, PHYSICAL                              | 18.52               | 30.50    | 2.26  | 1.14 | 0.00 | 2.26        | 1.24        | 0.00        |
| CLINICAL NEUROLOGY                               | 16.95               | 24.50    | 2.27  | 1.06 | 0.00 | 2.07        | 1.56        | 0.00        |
| COMPUTER SCIENCE, ARTIFICIAL INTELLIGENCE        | 16.77               | 67.60    | 1.40  | 1.69 | 0.00 | 1.70        | 1.59        | 0.00        |
| COMPUTER SCIENCE, CYBERNETICS                    | 10.42               | 17.38    | 1.68  | 1.15 | 0.00 | 1.28        | 1.75        | 0.00        |
| COMPUTER SCIENCE, HARDWARE & ARCHITECTURE        | 9.83                | 22.85    | 1.36  | 1.36 | 0.00 | 1.06        | 1.86        | 0.00        |
| COMPUTER SCIENCE, INFORMATION SYSTEMS            | 11.58               | 44.23    | 1.08  | 1.66 | 0.00 | 1.18        | 1.76        | 0.00        |
| COMPUTER SCIENCE, INTERDISCIPLINARY APPLICATIONS | 10.25               | 17.01    | 1.67  | 1.15 | 0.00 | 1.47        | 1.55        | 0.00        |
| COMPUTER SCIENCE, SOFTWARE ENGINEERING           | 8.85                | 18.78    | 1.33  | 1.30 | 0.00 | 1.03        | 1.81        | 0.00        |
| COMPUTER SCIENCE, THEORY & METHODS               | 9.59                | 20.47    | 1.40  | 1.31 | 0.00 | 1.20        | 1.61        | 0.00        |
| CONSTRUCTION & BUILDING TECHNOLOGY               | 7.36                | 9.60     | 1.50  | 0.99 | 0.00 | 1.20        | 1.60        | 0.00        |
| CRITICAL CARE MEDICINE                           | 18.15               | 30.29    | 2.23  | 1.15 | 0.00 | 1.93        | 1.85        | 0.00        |
| CRYSTALLOGRAPHY                                  | 8.10                | 75.93    | -0.15 | 2.12 | 0.00 | 0.85        | 1.62        | 0.00        |
| DENTISTRY, ORAL SURGERY & MEDICINE               | 11.11               | 16.74    | 1.82  | 1.09 | 0.00 | 1.72        | 1.59        | 0.00        |
| DERMATOLOGY                                      | 10.08               | 13.33    | 1.80  | 1.00 | 0.00 | 1.50        | 1.61        | 0.00        |
| DEVELOPMENTAL BIOLOGY                            | 31.01               | 41.21    | 2.93  | 1.01 | 0.00 | 2.93        | 1.11        | 0.08        |
| ECOLOGY                                          | 18.02               | 21.70    | 2.44  | 0.95 | 0.00 | 2.44        | 1.24        | 0.00        |
| EDUCATION, SCIENTIFIC DISCIPLINES                | 6.32                | 12.06    | 1.08  | 1.24 | 0.00 | 0.88        | 1.54        | 0.00        |
| ELECTROCHEMISTRY                                 | 17.34               | 22.32    | 2.36  | 0.99 | 0.00 | 2.26        | 1.29        | 0.00        |
| EMERGENCY MEDICINE                               | 7.59                | 12.42    | 1.38  | 1.14 | 0.00 | 1.08        | 1.64        | 0.00        |
| ENDOCRINOLOGY & METABOLISM                       | 21.68               | 36.95    | 2.40  | 1.17 | 0.00 | 2.50        | 1.27        | 0.00        |
| ENERGY & FUELS                                   | 11.90               | 19.92    | 1.81  | 1.16 | 0.00 | 1.41        | 1.95        | 0.00        |
| ENGINEERING, AEROSPACE                           | 4.70                | 8.01     | 0.87  | 1.17 | 0.00 | 0.57        | 1.67        | 0.01        |
| ENGINEERING, BIOMEDICAL                          | 18.82               | 25.18    | 2.42  | 1.01 | 0.00 | 2.32        | 1.31        | 0.00        |

Table S57: Publication year 2004.

| Subject-category                              | $\langle c \rangle$ | $\sigma$ | $z$   | $s$  | $p$  | $\tilde{z}$ | $\tilde{s}$ | $\tilde{p}$ |
|-----------------------------------------------|---------------------|----------|-------|------|------|-------------|-------------|-------------|
| ENGINEERING, CHEMICAL                         | 10.78               | 16.21    | 1.79  | 1.09 | 0.00 | 1.49        | 1.69        | 0.00        |
| ENGINEERING, CIVIL                            | 7.00                | 11.36    | 1.30  | 1.14 | 0.00 | 0.90        | 1.73        | 0.00        |
| ENGINEERING, ELECTRICAL & ELECTRONIC          | 11.32               | 29.08    | 1.41  | 1.42 | 0.00 | 1.31        | 1.72        | 0.00        |
| ENGINEERING, ENVIRONMENTAL                    | 16.39               | 23.38    | 2.24  | 1.05 | 0.00 | 2.14        | 1.35        | 0.00        |
| ENGINEERING, GEOLOGICAL                       | 7.08                | 9.86     | 1.42  | 1.04 | 0.00 | 1.32        | 1.44        | 0.00        |
| ENGINEERING, INDUSTRIAL                       | 8.28                | 10.86    | 1.61  | 1.00 | 0.00 | 1.41        | 1.50        | 0.00        |
| ENGINEERING, MANUFACTURING                    | 8.28                | 11.17    | 1.59  | 1.02 | 0.00 | 1.39        | 1.42        | 0.00        |
| ENGINEERING, MARINE                           | 1.06                | 3.27     | -1.13 | 1.54 | 0.00 | -1.53       | 2.34        | 0.33        |
| ENGINEERING, MECHANICAL                       | 7.54                | 11.09    | 1.44  | 1.07 | 0.00 | 1.14        | 1.67        | 0.00        |
| ENGINEERING, MULTIDISCIPLINARY                | 7.30                | 12.04    | 1.33  | 1.14 | 0.00 | 0.93        | 1.75        | 0.00        |
| ENGINEERING, OCEAN                            | 7.50                | 13.00    | 1.32  | 1.18 | 0.00 | 1.02        | 1.68        | 0.01        |
| ENGINEERING, PETROLEUM                        | 2.14                | 4.55     | -0.09 | 1.31 | 0.00 | -0.49       | 2.01        | 0.09        |
| ENTOMOLOGY                                    | 7.76                | 8.93     | 1.63  | 0.92 | 0.00 | 1.43        | 1.42        | 0.00        |
| ENVIRONMENTAL SCIENCES                        | 14.88               | 19.95    | 2.19  | 1.01 | 0.00 | 2.09        | 1.32        | 0.00        |
| EVOLUTIONARY BIOLOGY                          | 22.88               | 29.08    | 2.65  | 0.98 | 0.00 | 2.75        | 0.98        | 0.00        |
| FISHERIES                                     | 10.79               | 10.86    | 2.03  | 0.84 | 0.00 | 2.03        | 1.03        | 0.00        |
| FOOD SCIENCE & TECHNOLOGY                     | 11.97               | 14.66    | 2.02  | 0.96 | 0.00 | 1.92        | 1.36        | 0.00        |
| FORESTRY                                      | 11.42               | 13.84    | 1.98  | 0.95 | 0.00 | 1.88        | 1.25        | 0.00        |
| GASTROENTEROLOGY & HEPATOLOGY                 | 19.03               | 30.82    | 2.30  | 1.14 | 0.00 | 2.10        | 1.63        | 0.00        |
| GENETICS & HEREDITY                           | 25.56               | 43.16    | 2.57  | 1.16 | 0.00 | 2.67        | 1.16        | 0.00        |
| GEOCHEMISTRY & GEOPHYSICS                     | 15.79               | 31.09    | 1.97  | 1.26 | 0.00 | 2.17        | 1.26        | 0.00        |
| GEOGRAPHY, PHYSICAL                           | 14.60               | 21.12    | 2.12  | 1.06 | 0.00 | 2.22        | 1.16        | 0.00        |
| GEOLOGY                                       | 12.42               | 16.08    | 2.03  | 0.99 | 0.00 | 1.93        | 1.39        | 0.00        |
| GEOSCIENCES, MULTIDISCIPLINARY                | 11.71               | 16.21    | 1.92  | 1.03 | 0.00 | 1.82        | 1.33        | 0.00        |
| GERIATRICS & GERONTOLOGY                      | 15.10               | 19.40    | 2.23  | 0.98 | 0.00 | 2.03        | 1.59        | 0.00        |
| HEALTH CARE SCIENCES & SERVICES               | 11.78               | 18.65    | 1.84  | 1.12 | 0.00 | 1.74        | 1.52        | 0.00        |
| HEMATOLOGY                                    | 25.88               | 45.76    | 2.54  | 1.19 | 0.00 | 2.34        | 1.59        | 0.00        |
| HISTORY & PHILOSOPHY OF SCIENCE               | 4.18                | 7.61     | 0.70  | 1.21 | 0.00 | 0.50        | 1.51        | 0.10        |
| IMAGING SCIENCE & PHOTOGRAPHIC TECHNOLOGY     | 16.28               | 25.75    | 2.16  | 1.12 | 0.01 | 1.86        | 1.62        | 0.00        |
| IMMUNOLOGY                                    | 22.17               | 34.49    | 2.48  | 1.11 | 0.00 | 2.48        | 1.31        | 0.00        |
| INFECTIOUS DISEASES                           | 18.47               | 26.71    | 2.35  | 1.06 | 0.00 | 2.35        | 1.26        | 0.00        |
| INSTRUMENTS & INSTRUMENTATION                 | 8.28                | 13.74    | 1.45  | 1.15 | 0.00 | 1.25        | 1.55        | 0.00        |
| INTEGRATIVE & COMPLEMENTARY MEDICINE          | 10.45               | 11.01    | 1.97  | 0.87 | 0.00 | 1.77        | 1.36        | 0.00        |
| LIMNOLOGY                                     | 13.27               | 15.46    | 2.16  | 0.93 | 0.00 | 2.06        | 1.33        | 0.00        |
| MARINE & FRESHWATER BIOLOGY                   | 12.33               | 11.89    | 2.18  | 0.81 | 0.00 | 2.18        | 1.01        | 0.00        |
| MATERIALS SCIENCE, BIOMATERIALS               | 23.02               | 28.18    | 2.68  | 0.96 | 0.00 | 2.68        | 1.16        | 0.01        |
| MATERIALS SCIENCE, CERAMICS                   | 7.87                | 11.12    | 1.51  | 1.05 | 0.00 | 1.31        | 1.65        | 0.00        |
| MATERIALS SCIENCE, CHARACTERIZATION & TESTING | 4.59                | 8.17     | 0.81  | 1.20 | 0.00 | 0.51        | 1.59        | 0.04        |
| MATERIALS SCIENCE, COATINGS & FILMS           | 11.03               | 13.54    | 1.94  | 0.96 | 0.00 | 1.84        | 1.26        | 0.00        |
| MATERIALS SCIENCE, COMPOSITES                 | 9.44                | 15.20    | 1.61  | 1.13 | 0.00 | 1.51        | 1.43        | 0.00        |
| MATERIALS SCIENCE, MULTIDISCIPLINARY          | 13.68               | 25.74    | 1.86  | 1.23 | 0.00 | 1.66        | 1.53        | 0.00        |
| MATERIALS SCIENCE, PAPER & WOOD               | 4.67                | 6.58     | 0.99  | 1.04 | 0.00 | 0.79        | 1.55        | 0.00        |
| MATERIALS SCIENCE, TEXTILES                   | 5.72                | 11.00    | 0.97  | 1.24 | 0.00 | 0.77        | 1.54        | 0.01        |
| MATHEMATICAL & COMPUTATIONAL BIOLOGY          | 20.05               | 43.32    | 2.13  | 1.32 | 0.00 | 2.23        | 1.32        | 0.01        |
| MATHEMATICS                                   | 4.61                | 8.58     | 0.78  | 1.22 | 0.00 | 0.68        | 1.52        | 0.00        |
| MATHEMATICS, APPLIED                          | 6.65                | 12.71    | 1.13  | 1.24 | 0.00 | 1.03        | 1.54        | 0.00        |
| MATHEMATICS, INTERDISCIPLINARY APPLICATIONS   | 10.37               | 19.46    | 1.58  | 1.23 | 0.00 | 1.48        | 1.53        | 0.00        |
| MECHANICS                                     | 9.49                | 13.84    | 1.68  | 1.07 | 0.00 | 1.48        | 1.47        | 0.00        |
| MEDICAL ETHICS                                | 6.27                | 9.54     | 1.24  | 1.10 | 0.00 | 0.84        | 1.69        | 0.17        |
| MEDICAL INFORMATICS                           | 11.66               | 19.14    | 1.80  | 1.14 | 0.03 | 1.70        | 1.44        | 0.02        |

Table S58: Publication year 2004.

| Subject-category                              | $\langle c \rangle$ | $\sigma$ | $z$  | $s$  | $p$  | $\tilde{z}$ | $\tilde{s}$ | $\tilde{p}$ |
|-----------------------------------------------|---------------------|----------|------|------|------|-------------|-------------|-------------|
| MEDICAL LABORATORY TECHNOLOGY                 | 11.13               | 17.04    | 1.81 | 1.10 | 0.00 | 1.61        | 1.50        | 0.00        |
| MEDICINE, GENERAL & INTERNAL                  | 19.97               | 84.77    | 1.52 | 1.72 | 0.00 | 0.92        | 2.12        | 0.00        |
| MEDICINE, LEGAL                               | 7.02                | 10.16    | 1.38 | 1.06 | 0.00 | 0.98        | 1.66        | 0.00        |
| MEDICINE, RESEARCH & EXPERIMENTAL             | 20.29               | 44.48    | 2.13 | 1.33 | 0.00 | 2.03        | 1.62        | 0.00        |
| METALLURGY & METALLURGICAL ENGINEERING        | 8.12                | 13.88    | 1.41 | 1.17 | 0.00 | 1.11        | 1.77        | 0.00        |
| METEOROLOGY & ATMOSPHERIC SCIENCES            | 15.86               | 21.70    | 2.24 | 1.03 | 0.00 | 2.14        | 1.33        | 0.00        |
| MICROBIOLOGY                                  | 19.84               | 23.71    | 2.54 | 0.94 | 0.00 | 2.54        | 1.04        | 0.00        |
| MICROSCOPY                                    | 9.90                | 13.14    | 1.78 | 1.01 | 0.00 | 1.58        | 1.31        | 0.02        |
| MINERALOGY                                    | 10.95               | 13.14    | 1.95 | 0.94 | 0.00 | 1.85        | 1.35        | 0.00        |
| MINING & MINERAL PROCESSING                   | 6.01                | 9.48     | 1.17 | 1.12 | 0.00 | 0.77        | 1.82        | 0.00        |
| MULTIDISCIPLINARY SCIENCES                    | 48.85               | 110.03   | 2.99 | 1.34 | 0.00 | 1.99        | 2.24        | 0.00        |
| MYCOLOGY                                      | 10.45               | 15.32    | 1.77 | 1.07 | 0.00 | 1.77        | 1.27        | 0.01        |
| NANOSCIENCE & NANOTECHNOLOGY                  | 20.63               | 36.07    | 2.33 | 1.18 | 0.00 | 2.13        | 1.58        | 0.00        |
| NEUROIMAGING                                  | 25.95               | 34.69    | 2.74 | 1.01 | 0.00 | 2.64        | 1.31        | 0.01        |
| NEUROSCIENCES                                 | 23.48               | 31.27    | 2.65 | 1.01 | 0.00 | 2.65        | 1.11        | 0.00        |
| NUCLEAR SCIENCE & TECHNOLOGY                  | 6.03                | 10.61    | 1.09 | 1.19 | 0.00 | 0.99        | 1.49        | 0.00        |
| NURSING                                       | 7.86                | 16.59    | 1.21 | 1.30 | 0.00 | 1.21        | 1.70        | 0.00        |
| NUTRITION & DIETETICS                         | 18.44               | 25.43    | 2.38 | 1.03 | 0.00 | 2.28        | 1.33        | 0.00        |
| OBSTETRICS & GYNECOLOGY                       | 11.78               | 19.40    | 1.81 | 1.14 | 0.00 | 1.71        | 1.55        | 0.00        |
| OCEANOGRAPHY                                  | 13.66               | 15.12    | 2.21 | 0.89 | 0.00 | 2.21        | 1.10        | 0.00        |
| ONCOLOGY                                      | 23.44               | 39.33    | 2.48 | 1.16 | 0.00 | 2.48        | 1.36        | 0.00        |
| OPERATIONS RESEARCH & MANAGEMENT SCIENCE      | 10.69               | 15.73    | 1.79 | 1.07 | 0.00 | 1.69        | 1.37        | 0.00        |
| OPHTHALMOLOGY                                 | 11.97               | 19.12    | 1.85 | 1.13 | 0.00 | 1.65        | 1.53        | 0.00        |
| OPTICS                                        | 12.16               | 19.35    | 1.87 | 1.12 | 0.00 | 1.67        | 1.62        | 0.00        |
| ORNITHOLOGY                                   | 8.36                | 11.28    | 1.61 | 1.02 | 0.00 | 1.51        | 1.32        | 0.00        |
| ORTHOPEDICS                                   | 13.00               | 18.67    | 2.01 | 1.06 | 0.00 | 1.81        | 1.56        | 0.00        |
| OTORHINOLARYNGOLOGY                           | 9.01                | 10.45    | 1.77 | 0.92 | 0.00 | 1.57        | 1.42        | 0.00        |
| PALEONTOLOGY                                  | 9.70                | 11.22    | 1.85 | 0.92 | 0.00 | 1.75        | 1.32        | 0.00        |
| PARASITOLOGY                                  | 11.06               | 13.19    | 1.96 | 0.94 | 0.00 | 1.96        | 1.14        | 0.00        |
| PATHOLOGY                                     | 14.42               | 19.37    | 2.15 | 1.01 | 0.00 | 1.95        | 1.52        | 0.00        |
| PEDIATRICS                                    | 10.69               | 16.21    | 1.77 | 1.09 | 0.00 | 1.47        | 1.59        | 0.00        |
| PERIPHERAL VASCULAR DISEASE                   | 25.41               | 45.74    | 2.51 | 1.20 | 0.00 | 2.41        | 1.60        | 0.00        |
| PHARMACOLOGY & PHARMACY                       | 14.65               | 17.58    | 2.24 | 0.94 | 0.00 | 2.14        | 1.24        | 0.00        |
| PHYSICS, APPLIED                              | 14.24               | 27.63    | 1.88 | 1.25 | 0.00 | 1.78        | 1.55        | 0.00        |
| PHYSICS, ATOMIC, MOLECULAR & CHEMICAL         | 14.32               | 20.54    | 2.10 | 1.06 | 0.00 | 2.10        | 1.16        | 0.00        |
| PHYSICS, CONDENSED MATTER                     | 13.39               | 27.74    | 1.76 | 1.29 | 0.00 | 1.56        | 1.59        | 0.00        |
| PHYSICS, FLUIDS & PLASMAS                     | 12.31               | 17.96    | 1.94 | 1.07 | 0.00 | 1.94        | 1.27        | 0.00        |
| PHYSICS, MATHEMATICAL                         | 11.38               | 20.47    | 1.71 | 1.20 | 0.00 | 1.61        | 1.50        | 0.00        |
| PHYSICS, MULTIDISCIPLINARY                    | 16.17               | 33.00    | 1.96 | 1.28 | 0.00 | 1.56        | 1.88        | 0.00        |
| PHYSICS, NUCLEAR                              | 10.24               | 17.27    | 1.65 | 1.16 | 0.00 | 1.45        | 1.56        | 0.00        |
| PHYSICS, PARTICLES & FIELDS                   | 14.33               | 26.23    | 1.93 | 1.21 | 0.00 | 1.63        | 1.71        | 0.00        |
| PHYSIOLOGY                                    | 18.73               | 19.82    | 2.55 | 0.87 | 0.00 | 2.55        | 0.96        | 0.00        |
| PLANT SCIENCES                                | 15.45               | 23.54    | 2.14 | 1.10 | 0.00 | 2.14        | 1.30        | 0.00        |
| POLYMER SCIENCE                               | 14.16               | 18.65    | 2.15 | 1.00 | 0.00 | 2.05        | 1.30        | 0.00        |
| PRIMARY HEALTH CARE                           | 6.93                | 11.16    | 1.30 | 1.13 | 0.00 | 0.70        | 2.03        | 0.00        |
| PSYCHIATRY                                    | 20.88               | 27.61    | 2.53 | 1.00 | 0.00 | 2.33        | 1.51        | 0.00        |
| PSYCHOLOGY                                    | 17.93               | 21.34    | 2.45 | 0.94 | 0.00 | 2.45        | 1.14        | 0.00        |
| PUBLIC, ENVIRONMENTAL & OCCUPATIONAL HEALTH   | 15.31               | 22.65    | 2.15 | 1.08 | 0.00 | 2.05        | 1.48        | 0.00        |
| RADIOLOGY, NUCLEAR MEDICINE & MEDICAL IMAGING | 15.78               | 23.34    | 2.18 | 1.08 | 0.00 | 1.98        | 1.58        | 0.00        |
| REHABILITATION                                | 11.45               | 13.36    | 2.01 | 0.93 | 0.00 | 1.81        | 1.43        | 0.00        |

Table S59: Publication year 2004.



| Subject-category                    | $\langle c \rangle$ | $\sigma$     | $z$         | $s$         | $p$         | $\tilde{z}$ | $\tilde{s}$ | $\tilde{p}$ |
|-------------------------------------|---------------------|--------------|-------------|-------------|-------------|-------------|-------------|-------------|
| REMOTE SENSING                      | 14.94               | 22.64        | 2.11        | 1.09        | 0.07        | 1.91        | 1.49        | 0.01        |
| REPRODUCTIVE BIOLOGY                | 15.26               | 23.22        | 2.13        | 1.10        | 0.00        | 2.23        | 1.30        | 0.00        |
| RESPIRATORY SYSTEM                  | 16.34               | 24.94        | 2.19        | 1.10        | 0.00        | 1.99        | 1.70        | 0.00        |
| RHEUMATOLOGY                        | 18.28               | 29.21        | 2.27        | 1.13        | 0.00        | 1.97        | 1.73        | 0.00        |
| ROBOTICS                            | 11.17               | 17.35        | 1.80        | 1.11        | 0.02        | 1.50        | 1.61        | 0.04        |
| SOIL SCIENCE                        | 11.08               | 12.70        | 1.99        | 0.92        | 0.00        | 1.89        | 1.32        | 0.00        |
| SPECTROSCOPY                        | 9.56                | 13.38        | 1.71        | 1.04        | 0.00        | 1.51        | 1.44        | 0.00        |
| SPORT SCIENCES                      | 13.44               | 16.51        | 2.14        | 0.96        | 0.00        | 2.04        | 1.36        | 0.00        |
| STATISTICS & PROBABILITY            | 9.04                | 21.90        | 1.24        | 1.39        | 0.00        | 1.24        | 1.49        | 0.00        |
| SUBSTANCE ABUSE                     | 16.99               | 21.11        | 2.37        | 0.96        | 0.00        | 2.37        | 1.17        | 0.01        |
| SURGERY                             | 12.25               | 19.60        | 1.87        | 1.13        | 0.00        | 1.67        | 1.63        | 0.00        |
| TELECOMMUNICATIONS                  | 9.97                | 26.84        | 1.24        | 1.45        | 0.00        | 0.84        | 2.05        | 0.00        |
| THERMODYNAMICS                      | 9.76                | 13.53        | 1.74        | 1.03        | 0.00        | 1.64        | 1.33        | 0.00        |
| TOXICOLOGY                          | 13.82               | 18.32        | 2.12        | 1.00        | 0.00        | 2.22        | 1.11        | 0.00        |
| TRANSPLANTATION                     | 13.21               | 19.69        | 2.00        | 1.08        | 0.00        | 1.90        | 1.48        | 0.00        |
| TRANSPORTATION SCIENCE & TECHNOLOGY | 5.44                | 11.31        | 0.86        | 1.29        | 0.00        | 0.36        | 1.99        | 0.05        |
| TROPICAL MEDICINE                   | 11.39               | 13.41        | 2.00        | 0.93        | 0.00        | 1.80        | 1.43        | 0.00        |
| UROLOGY & NEPHROLOGY                | 15.58               | 23.99        | 2.14        | 1.10        | 0.00        | 1.94        | 1.60        | 0.00        |
| VETERINARY SCIENCES                 | 7.64                | 10.73        | 1.49        | 1.04        | 0.00        | 1.29        | 1.54        | 0.00        |
| VIROLOGY                            | 21.66               | 23.79        | 2.68        | 0.89        | 0.00        | 2.68        | 0.99        | 0.00        |
| WATER RESOURCES                     | 10.86               | 13.89        | 1.90        | 0.98        | 0.00        | 1.80        | 1.39        | 0.00        |
| ZOOLOGY                             | 10.07               | 13.12        | 1.81        | 0.99        | 0.00        | 1.61        | 1.50        | 0.00        |
| <b>TOTAL</b>                        | <b>15.79</b>        | <b>34.42</b> | <b>1.88</b> | <b>1.32</b> | <b>0.00</b> | <b>1.88</b> | <b>1.62</b> | <b>0.00</b> |

Table S60: Publication year 2004.
